# Supplementary material
Source: PubMed Central journal article supplement (PMC9979631)

## Supporting Information

# **Elucidating the Mechanism of Excited State Bond Homolysis in Nickel–Bipyridine Photoredox Catalysts**

David A. Cagan<sup>a</sup>, Daniel Bím<sup>a</sup>, Breno Silva<sup>a,b</sup>, Nathanael P. Kazmierczak<sup>a</sup>, Brendon J.

McNicholas<sup>a</sup>, and Ryan G. Hadt<sup>a,\*</sup>

<sup>a</sup>Division of Chemistry and Chemical Engineering, Arthur Amos Noyes Laboratory of Chemical Physics, California  
Institute of Technology, Pasadena, California 91125, United States

<sup>b</sup>Department of Chemistry and Biochemistry, Suffolk University, Boston, Massachusetts 02108, United States

\*Corresponding Author: [rghadt@caltech.edu](mailto:rghadt@caltech.edu)

## Table of Contents

|                                                               |            |
|---------------------------------------------------------------|------------|
| <b>S1. Experimental Section.....</b>                          | <b>2</b>   |
| S1.1. General Considerations. ....                            | 2          |
| S1.2. Photochemical Setup. ....                               | 3          |
| S1.3. Synthetic Details.....                                  | 4          |
| S1.4. X-ray Crystallography.....                              | 12         |
| S1.5. Steady-State UV-vis Spectroscopy. ....                  | 14         |
| S1.6. Photolysis Experiments. ....                            | 20         |
| S1.7. Wavelength Dependence Studies. ....                     | 28         |
| S1.8. Thermal Dependence Studies – Eyring Analysis.....       | 31         |
| S1.9. Global Analysis Modeling of Kinetics.....               | 33         |
| S1.10. Kinetic Trends and Miscellaneous Photolysis Data. .... | 51         |
| S1.11. Quantum Yield Determination. ....                      | 57         |
| <b>S2. Computational Section. ....</b>                        | <b>60</b>  |
| S2.1. General Computational Considerations.....               | 60         |
| S2.2 Limitations of the Computational Methods.....            | 64         |
| S2.3 Ground-State Calculated Properties .....                 | 68         |
| S2.4 Excited-State Calculated Properties. ....                | 76         |
| S2.5 Additional Calculated Properties.....                    | 94         |
| <b>S3. References.....</b>                                    | <b>204</b> |
| <b>S4. NMR Spectra.....</b>                                   | <b>207</b> |

## S1. Experimental Section.

### S1.1. General Considerations.

All purchased compounds were used as received unless otherwise noted. Bis-(1,5-cyclooctadiene) nickel(0) and bis(triphenylphosphino)(2-methylphenyl)chloronickel(II) were purchased from Strem Chemicals. Ligands 4,4'-dimethoxy-2,2'-bipyridine (<sup>MeO</sup>bpy), 4,4'-di-*tert*-butyl-2,2'-bipyridine (<sup>tBu</sup>bpy), 2,2'-bipyridine (bpy), and dimethyl-2,2'-bipyridine-4,4'-dicarboxylate (<sup>MeOOC</sup>bpy), and *N,N,N',N'*-tetramethyl ethylenediamine (TMEDA) were purchased from Sigma-Aldrich. Aryl halide compounds, 2-chlorotoluene, chlorobenzene, 2-chloroanisole, 1-chloro-2-fluorobenzene, 2-chlorobenzotrifluoride, and 2-bromotoluene were also obtained from Sigma-Aldrich. Solids were dried under vacuum and brought into a nitrogen-atmosphere glove box; liquids were sparged (N<sub>2</sub>) and degassed via freeze-pump-thaw techniques, brought into the glove box, and stored over 3 Å molecular sieves. All solvents were air-free and collected from the solvent purification system (SPS), then stored in the glove box over 3 Å molecular sieves. Tetrahydrofuran (THF) was inhibitor-free. All synthesized compounds were made using air-free Schlenk techniques or made in the glove box. Compounds **1A–1C**, **2B**, **1B–Br**, and precatalyst, Ni(TMEDA)(CH<sub>3</sub>Ph)Cl, were prepared following a modified literature procedure<sup>1,2</sup> (details below). All synthesized complexes are considered air and moisture sensitive. Light sensitivity was also seen even in the solid state if left exposed for extended time.

UV-vis spectra of the complexes were obtained on a Varian Cary 500 spectrophotometer using Starna Cells air free 9-SOG or 6-Q 10 mm path length cuvettes. Deuterated solvents were dried and stored over activated 3 Å molecular sieves in a nitrogen-filled glove box. Proton nuclear magnetic resonance (<sup>1</sup>H NMR) and fluorine nuclear magnetic resonance (<sup>19</sup>F NMR) spectra were recorded on a 400 MHz Varian Spectrometer with broadband auto-tune OneProbe. All <sup>13</sup>C NMR spectra were collected on a Bruker AV-III HD 400 MHz spectrometer. <sup>13</sup>C NMR spectra were <sup>1</sup>H decoupled. Chemical shifts are reported in parts per million (δ in ppm, s: singlet, d: doublet, t: triplet, m: multiplet) and are referenced to residual solvent signal (CD<sub>2</sub>Cl<sub>2</sub> = δ 5.32 ppm, THF-*d*<sub>8</sub> = 3.58 ppm). Fluorine NMR were externally referenced to neat fluorobenzene (δ = -113.15 ppm). Fourier transform infrared (FTIR) spectra were collected using a Thermo Scientific Nicolet iS5 FTIR spectrometer with an iD5 diamond ATR accessory in an inert-atmosphere glove box.

### S1.2. Photochemical Setup.

Photochemical stocks were prepared in a nitrogen-filled glove box and distributed into separate spectroscopic cuvettes (Starna Cells, 10 mm path length) with air-tight seals. Each cuvette cell had volume of 2.5 mL as determined by syringe and were placed 5 cm away from a Kessil PR160L LED ( $\lambda_{\text{max}} = 390 \text{ nm}$  unless otherwise specified) on highest setting (Figure S1). Reactions were run in triplicate. A cooling fan was used to maintain room temperature irradiation during the experiment. Sample positions were rotated periodically to ensure even irradiation throughout the entire duration of the experiment.

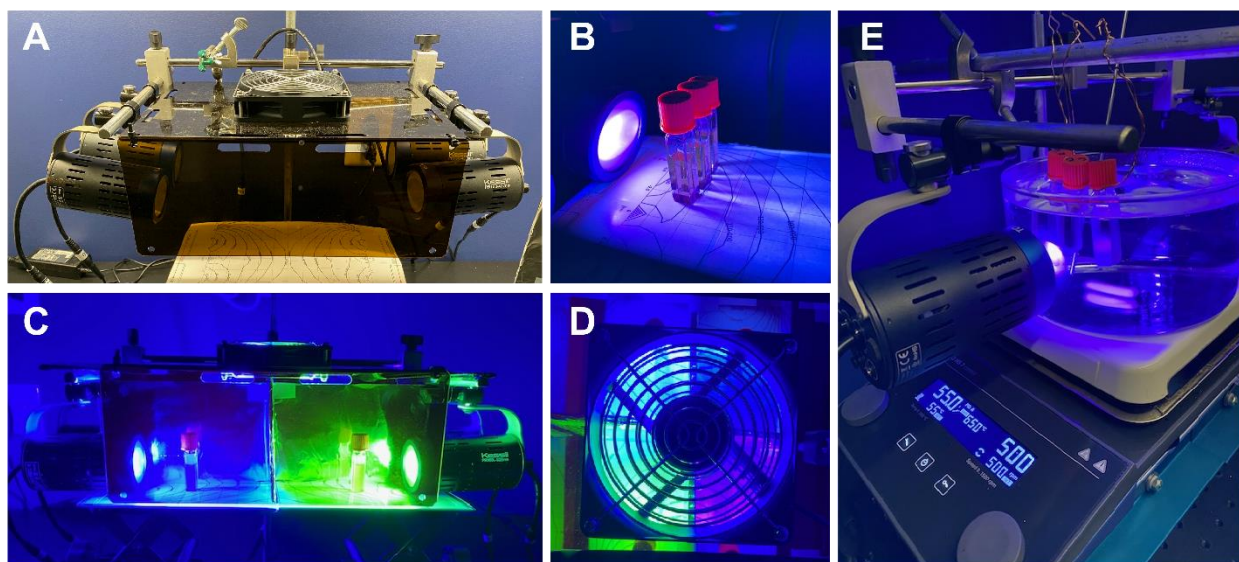

**Figure S1.** Photochemical setup. (A) Side view of Kessil LEDs with cooling fan on top. (B) Typical irradiation setup with cuvettes placed on isopower curves 5 cm away from the light source. (C) Wavelength dependence experiment. (D) Top-down view of wavelength dependent experiment (LEDs 390 nm, 427 nm, 456 nm, and 525 nm). (E) Thermal dependence experiment using suspended cuvettes in a water bath.

### S1.3. Synthetic Details.

Two primary approaches were utilized when undertaking the synthesis of the nickel complexes, the method of oxidative addition and the method of ligand substitution.<sup>1-3</sup> In the former, bis-(1,5-cyclooctadiene) nickel(0) was pre-stirred with a bipyridine ligand, then reacted with aryl halide resulting in the desired complex. The latter method called for either bis(triphenylphosphino)(2-methylphenyl)chloronickel(II) or the independent preparation of a pre-catalyst complex, Ni(TMEDA)(R'-Ph)Cl, R' = CH<sub>3</sub> or CF<sub>3</sub>.<sup>3,4</sup> These compounds afforded more labile ligands which could be substituted by bipyridine. The pre-catalyst complexes themselves were prepared by the method of oxidative addition. The method of ligand substitution was used in cases where oxidative addition proved slow, yielded inconsistent results, or would not produce the desired product.

*The Method of Oxidative Addition:*

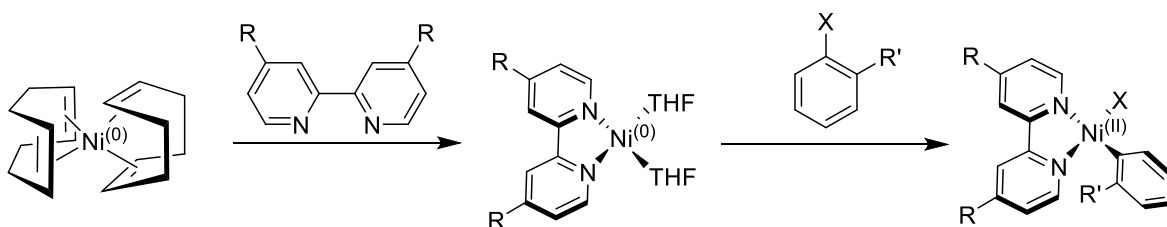

*The Method of Ligand Substitution:*

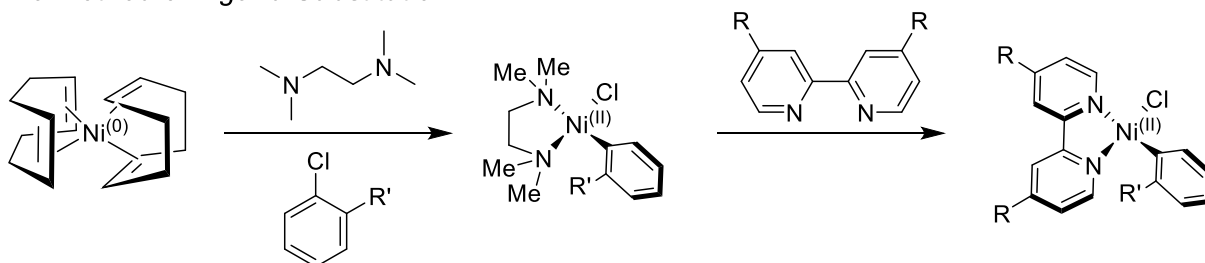

**Scheme S1.** The two general synthetic strategies employed in this study are shown.

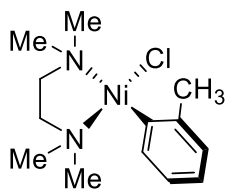

*Ni(TMEDA)(CH<sub>3</sub>Ph)Cl. Method of oxidative addition.* In a nitrogen filled glove box, a 20 mL scintillation vial was charged with a Teflon coated stir bar and 1.0 g (1 eq., 3.6 mmol) of bis-(1,5-cyclooctadiene) nickel(0). Via micro syringe, 0.48 mL (1.3 eq., 1.95 mmol) of *N,N,N',N'*-tetramethyl ethylenediamine was added along with 7.2 mL of 2-chlorotoluene (excess). After 6 hours stirring at room temperature, an orange solid could be seen in the vial. Hexanes was added (10 mL) to precipitate the solid and the mixture was left overnight. The solid was collected by vacuum filtration where it was rinsed with copious hexanes and dried, affording a yellow/orange solid (650 mg, 60% yield). Diffraction quality crystals were attempted from a concentrated solution of the complex in methylene chloride via vapor diffusion with hexanes,

however, green cubic-like crystals were yielded instead. These were identified as paramagnetic  $\mu_3$ -chloro- $\mu_3$ -hydroxo-tris( $\mu$ -chloro)tris(tetramethylethylenediamine-nickel(II)) chloride, which has been reported to develop upon recrystallization of Ni(TMEDA)(CH<sub>3</sub>Ph)Cl in chlorinated solvents. UV-vis (THF):  $\lambda = 470$  nm,  $\epsilon_{470\text{nm}} = 180 \text{ M}^{-1} \text{ cm}^{-1}$ . <sup>1</sup>H NMR (400 MHz, CD<sub>2</sub>Cl<sub>2</sub>):  $\delta$  7.38 (dd,  $J = 7.4, 1.4$  Hz, 1H), 6.72 – 6.56 (m, 3H), 3.43 (s, 3H), 2.66 – 2.35 (m, 12H), 2.17 (s, 2H), 1.83 (s, 2H). <sup>13</sup>C{<sup>1</sup>H} NMR (100 MHz, CD<sub>2</sub>Cl<sub>2</sub>)  $\delta$  146.1, 143.6, 135.5, 126.5, 122.4, 122.07, 61.5, 57.2, 50.4, 48.2, 48.0, 46.4, 25.9. FT-IR (ATR, cm<sup>-1</sup>): 3355, 3038, 2975, 2893, 2872, 2841, 2787, 1559, 1458, 1403, 1370, 1277, 1194, 1122, 1019, 955, 806, 736, 650, 601.

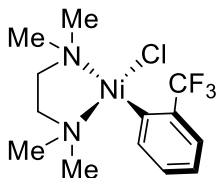

*Ni(TMEDA)(CF<sub>3</sub>Ph)Cl. Method of oxidative addition.* In a nitrogen filled glove box, a 20 mL scintillation vial was charged with a Teflon coated stir bar and 0.41 g (1 eq., 1.5 mmol) of bis-(1,5-cyclooctadiene) nickel(0). Via micro syringe, 0.30 mL (1.3 eq., 1.95 mmol) of *N,N,N',N'*-tetramethyl ethylenediamine was added along with 3.75 mL of 2-chlorobenzotrifluoride (excess). After 5 hours stirring at room temperature, a light red solid could be seen in the vial. Hexanes was added (10 mL) to precipitate the solid and the mixture was left overnight. The red/pink solid was collected by vacuum filtration where it was rinsed with copious hexanes and dried (464 mg, 87% yield). Diffraction quality crystals (red/orange and needle-like) were grown by vapor diffusion from a concentrated solution of the complex in methylene chloride with hexanes. UV-vis (THF):  $\lambda = 481$  nm,  $\epsilon_{481\text{nm}} = 180 \text{ M}^{-1} \text{ cm}^{-1}$ . <sup>1</sup>H NMR (400 MHz, CD<sub>2</sub>Cl<sub>2</sub>):  $\delta$  7.88 (d,  $J = 7.7$  Hz, 1H), 7.13 (d,  $J = 8.1$  Hz, 1H), 7.00 (t,  $J = 7.4$  Hz, 1H), 6.82 (t,  $J = 7.5$  Hz, 1H), 3.27–1.39 (m,  $J = 114.6$  Hz, 16H). <sup>13</sup>C{<sup>1</sup>H} NMR (100 MHz, CD<sub>2</sub>Cl<sub>2</sub>)  $\delta$  145.9 (q,  $J_{\text{CF}} = 4$  Hz), 137.1, 136.8 (q,  $J_{\text{CF}} = 28$  Hz), 127.0, 126.0 (q,  $J_{\text{CF}} = 273$  Hz), 125.2 (q,  $J_{\text{CF}} = 4$  Hz), 122.2, 61.1, 57.6, 50.9, 48.2. <sup>19</sup>F NMR (400 MHz, CD<sub>2</sub>Cl<sub>2</sub>):  $\delta$  -56.58 (s). FT-IR (ATR, cm<sup>-1</sup>): 3355, 3034, 2980, 2899, 2841, 2792, 1578, 1522, 1470, 1423, 1308, 1275, 1234, 1155, 1092, 1024, 951, 808, 777, 739, 674, 642, 604.

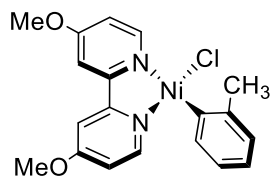

*Ni<sup>(MeO)bpy</sup>(CH<sub>3</sub>Ph)Cl, 1A. Method of ligand substitution.* In a nitrogen filled glove box, a 20 mL scintillation vial was charged with a Teflon coated stir bar and bis(triphenylphosphino)(2-methylphenyl)chloronickel(II) (0.200 g, 0.281 mmol, 1 eq.). To this vial, 4,4'-dimethoxy-2,2'-bipyridine (0.061 g, 0.281 mmol, 1 eq.) and diethyl ether (6 mL) were added. The red/orange mixture was stirred for 6 hours affording an orange solid. This solid was washed with diethyl ether (2x1 mL) and hexanes (3x3 mL), then collected and dried under vacuum (0.081 g, 71% yield). UV-vis (THF):  $\lambda = 462$  nm,  $\epsilon_{462\text{nm}} = 3640 \text{ M}^{-1} \text{ cm}^{-1}$ . UV-vis (Toluene):  $\lambda = 479$  nm,  $\epsilon_{479\text{nm}} = 2000 \text{ M}^{-1} \text{ cm}^{-1}$ . <sup>1</sup>H NMR (400 MHz, CD<sub>2</sub>Cl<sub>2</sub>):  $\delta$  8.91 (d,  $J = 6.5$  Hz, 1H), 7.53 (d,

$J = 6.9$  Hz, 1H), 7.32 (d,  $J = 13.7$  Hz, 2H), 7.01 (s, 2H), 6.77 (d,  $J = 6.8$  Hz, 3H), 6.59 (s, 1H), 3.98 (s, 3H), 3.88 (s, 3H), 3.07 (s, 3H).  $^{13}\text{C}\{^1\text{H}\}$  NMR (100 MHz,  $\text{CD}_2\text{Cl}_2$ )  $\delta$  168.1, 167.3, 157.5, 154.2, 153.1, 151.1, 150.5, 142.8, 135.6, 127.4, 123.2, 122.7, 111.5, 111.1, 108.1, 107.5, 56.7, 25.2. FT-IR (ATR,  $\text{cm}^{-1}$ ): 3115, 3068, 3032, 3012, 2975, 2953, 2929, 2843, 1608, 1557, 1493, 1473, 1455, 1436, 1419, 1338, 1312, 1277, 1245, 1226, 1105, 1038, 1026, 1007, 870, 837, 743, 695, 649, 596, 573.

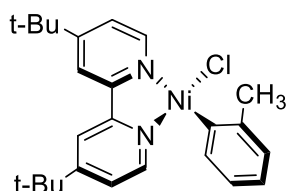

$\text{Ni}(\text{t-Bubpy})(\text{CH}_3\text{Ph})\text{Cl}$ , **1B**. *Method of oxidative addition.* In a nitrogen filled glove box, a 20 mL scintillation vial was charged with a Teflon coated stir bar, bis-(1,5-cyclooctadiene) nickel(0) (0.225 g, 1.0 mmol, 1 eq.), and 4,4'-tert-butyl-2,2'-bipyridine (0.268 g, 1.0 mmol, 1.0 eq.). To this vial, 3.0 mL THF was added, and the mixture was stirred for one hour affording a deep purple solution. Subsequently, 6.0 mL of 2-chlorotoluene (excess) was added, affording a red solution after 30 minutes of stirring at room temperature. Hexanes (10 mL) was used to precipitate the red solid. The vial was placed in the freezer ( $-35$  °C) for ten minutes to complete precipitation. The red solid was collected by filtration, washed with hexanes (3x3 mL), diethyl ether (2x1 mL), and hexanes again (3x3 mL), then dried under vacuum (0.375 g, 83% yield). Diffraction quality crystals (deep red and needle-like) were grown by slow evaporation from THF.<sup>5</sup> UV-vis (THF):  $\lambda = 475$  nm,  $\epsilon_{475\text{nm}} = 4970$   $\text{M}^{-1} \text{cm}^{-1}$ . UV-vis (Toluene):  $\lambda = 493$  nm,  $\epsilon_{493\text{nm}} = 3790$   $\text{M}^{-1} \text{cm}^{-1}$ .  $^1\text{H}$  NMR (400 MHz,  $\text{CD}_2\text{Cl}_2$ ):  $\delta$  9.03 (d,  $J = 5.8$  Hz, 1H), 7.85 (s, 1H), 7.80 (d,  $J = 2.1$  Hz, 1H), 7.56 – 7.49 (m, 2H), 7.15 (d,  $J = 6.2$  Hz, 1H), 7.10 (dd,  $J = 6.2, 2.1$  Hz, 1H), 6.79 (dd,  $J = 7.6, 3.1$  Hz, 3H), 3.04 (s, 3H), 1.42 (s, 9H), 1.34 (s, 9H).  $^{13}\text{C}\{^1\text{H}\}$  NMR (100 MHz,  $\text{CD}_2\text{Cl}_2$ )  $\delta$  164.0, 162.9, 156.3, 152.9, 151.3, 149.3, 142.6, 135.7, 127.5, 123.9, 123.6, 123.2, 122.7, 117.8, 117.0, 35.7, 30.4, 30.2, 25.1. FT-IR (ATR,  $\text{cm}^{-1}$ ): 3037, 2961, 2903, 2869, 1616, 1543, 1480, 1456, 1435, 1410, 1364, 1253, 1201, 1094, 1017, 863, 839, 736, 691, 601.

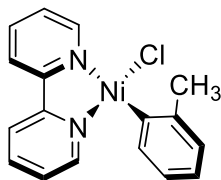

$\text{Ni}(\text{Hbpy})(\text{CH}_3\text{Ph})\text{Cl}$ , **1C**. *Method of ligand substitution.* In a nitrogen filled glove box, a 20 mL scintillation vial was charged with a Teflon coated stir bar and bis(triphenylphosphino)(2-methylphenyl)chloronickel(II) (0.450 g, 0.634 mmol, 1 eq.). To this vial, 2,2'-bipyridine (0.100 g, 0.641 mmol, 1 eq.) and diethyl ether (13 mL) was added. The red/orange mixture was stirred for 4 hours affording a bright red solid. This solid was washed with diethyl ether (2x5 mL) and hexanes (2x10 mL), then collected and dried under vacuum (0.193 g, 89% yield). UV-vis (THF):  $\lambda = 483$  nm,  $\epsilon_{483\text{nm}} = 4070$   $\text{M}^{-1} \text{cm}^{-1}$ . UV-vis (Toluene):  $\lambda = 502$  nm,  $\epsilon_{502\text{nm}} = 1600$   $\text{M}^{-1} \text{cm}^{-1}$ .  $^1\text{H}$  NMR (400 MHz,  $\text{CD}_2\text{Cl}_2$ ):  $\delta$  9.21 (s, 1H), 8.01 (s, 1H), 7.96 – 7.86 (m,

5H), 7.54 (d,  $J = 21.2$  Hz, 2H), 7.32 (s, 1H), 7.13 (s, 1H), 6.81 (s, 3H), 3.04 (s, 3H).  $^{13}\text{C}\{^1\text{H}\}$  NMR (100 MHz,  $\text{CD}_2\text{Cl}_2$ )  $\delta$  156.3, 152.9, 151.9, 150.2, 149.8, 142.6, 139.2, 138.1, 135.77, 127.7, 126.9, 126.4, 123.4, 123.0, 121.2, 120.5, 25.1. FT-IR (ATR,  $\text{cm}^{-1}$ ): 3103, 3041, 2973, 1600, 1568, 1468, 1422, 1311, 1241, 1155, 1059, 1024, 899, 756, 727, 649, 637, 605.

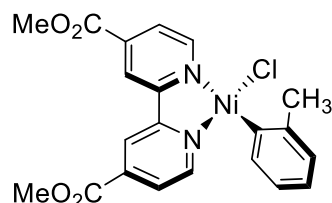

$\text{Ni}(\text{CH}_3\text{OOCbpy})(\text{CH}_3\text{Ph})\text{Cl}$ , **1D**. *Method of ligand substitution.* In a nitrogen filled glove box, a 25 mL Schlenk flask was charged with a Teflon coated stir bar and  $\text{Ni}(\text{TMEDA})(\text{CH}_3\text{Ph})\text{Cl}$  (0.051 g, 0.168 mmol, 1 eq.). To this vial, dimethyl-2,2'-bipyridine-4,4'-dicarboxylate (0.053 g, 0.176 mmol, 1 eq.) was added along with 4.81 mL of heptane and 0.81 mL toluene (6:1 heptane/toluene). The flask was attached to the nitrogen Schlenk line, and the brown/orange mixture was stirred at  $60^\circ\text{C}$ . After two hours the mixture became a deep purple solution. After 10 hours the Schlenk flask was brought back into the glove box where it was cooled in the freezer ( $-35^\circ\text{C}$ ) for ten minutes precipitating a purple solid. This solid was collected by vacuum filtration, washed with pentanes (2x5 mL), ether (2x5 mL), and hexanes (2x5 mL), then was dried under vacuum (0.063 g, 84% yield). UV-vis (THF):  $\lambda = 532$  nm,  $\epsilon_{532\text{nm}} = 5259 \text{ M}^{-1} \text{ cm}^{-1}$ . UV-vis (Toluene):  $\lambda = 551$  nm,  $\epsilon_{551\text{nm}} = 1637 \text{ M}^{-1} \text{ cm}^{-1}$ .  $^1\text{H}$  NMR (400 MHz,  $\text{CD}_2\text{Cl}_2$ ):  $\delta$  9.50 (dd,  $J = 5.7, 1.1$  Hz, 1H), 8.59 (d,  $J = 1.8$  Hz, 1H), 8.53 – 8.48 (m, 1H), 8.17 – 8.11 (m, 1H), 7.72 – 7.65 (m, 1H), 7.57 (dd,  $J = 6.0, 1.1$  Hz, 1H), 7.49 – 7.43 (m, 1H), 6.87 – 6.81 (m, 3H), 4.04 (s, 3H), 3.97 (s, 3H), 2.98 (s, 3H).  $^{13}\text{C}\{^1\text{H}\}$  NMR (100 MHz,  $\text{CD}_2\text{Cl}_2$ )  $\delta$  164.5, 164.3, 156.3, 153.1, 152.6, 151.0, 149.3, 142.3, 140.3, 138.7, 135.3, 128.1, 126.7, 126.1, 123.8, 123.5, 121.2, 120.4, 25.0. FT-IR (ATR,  $\text{cm}^{-1}$ ): 2981, 2961, 2852, 1730, 1618, 1557, 1434, 1398, 1358, 1295, 1252, 1233, 1190, 1124, 1012, 958, 764, 722, 698.

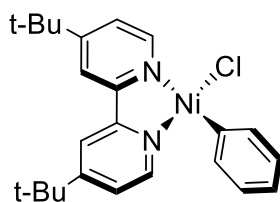

$\text{Ni}(\text{tBu}bpy)(\text{Ph})\text{Cl}$ , **2B**. *Method of oxidative addition.* The general procedure for the synthesis of **1B** was followed, except 0.4 mL of chlorobenzene was used as aryl halide. After 30 minutes of stirring at room temperature, the mixture became a red solution. Hexanes (10 mL) was used to precipitate the orange solid. The vial was placed in the freezer ( $-35^\circ\text{C}$ ) for ten minutes to complete precipitation. The solid was collected by filtration, washed with hexanes (3x3 mL) and pentanes (3x3 mL), then dried under vacuum (0.290 g, 91% yield). UV-vis (THF):  $\lambda = 471$  nm,  $\epsilon_{471\text{nm}} = 3530 \text{ M}^{-1} \text{ cm}^{-1}$ . UV-vis (Toluene):  $\lambda = 489$  nm,  $\epsilon_{489\text{nm}} = 3905 \text{ M}^{-1} \text{ cm}^{-1}$ .  $^1\text{H}$  NMR (400 MHz,  $\text{CD}_2\text{Cl}_2$ ):  $\delta$  9.01 (d,  $J = 5.9$  Hz, 1H), 7.85 (s, 1H), 7.80 (s, 1H), 7.53 – 7.47 (m, 3H), 7.30 (d,  $J = 6.3$  Hz, 1H), 7.12 (d,  $J = 6.2$  Hz, 1H), 6.94 (t,  $J = 7.4$  Hz, 2H), 6.85 – 6.79 (m, 1H), 1.41 (s, 9H), 1.34 (s, 9H).  $^{13}\text{C}\{^1\text{H}\}$  NMR (100 MHz,  $\text{CD}_2\text{Cl}_2$ )  $\delta$  163.7, 162.7, 151.9, 150.3, 149.2, 141.4, 136.3,



128.8, 128.5, 127.3, 127.1, 126.1, 125.8, 122.3, 117.5, 116.8, 35.4, 30.1, 29.9. FT-IR (ATR,  $\text{cm}^{-1}$ ): 3048, 2961, 2904, 2868, 1611, 1562, 1458, 1407, 1366, 1249, 1202, 1060, 1018, 897, 856, 731, 694, 602, 555.

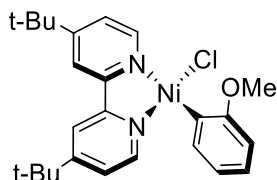

$\text{Ni}(\text{tBu})_2\text{bpy}(\text{CH}_3\text{OPh})\text{Cl}$ , **3B**. *Method of oxidative addition.* The general procedure for the synthesis of **1B** was followed, except 0.5 mL of 2-chloroanisole was added as aryl halide. Upon stirring for 30 minutes at room temperature, a red solution was seen. Hexanes (10 mL) was added to precipitate the airy red solid (which clung to the sides of the glass). The vial was left in the freezer ( $-35\text{ }^\circ\text{C}$ ) for ten minutes to complete precipitation. The solid was collected by filtration, washed with hexanes (2x2 mL), diethyl ether (2x2 mL), and hexanes again (2x2 mL), then dried under vacuum (0.298 g, 88% yield). UV-vis (THF):  $\lambda = 464\text{ nm}$ ,  $\epsilon_{464\text{nm}} = 2660\text{ M}^{-1}\text{ cm}^{-1}$ . UV-vis (Toluene):  $\lambda = 479\text{ nm}$ ,  $\epsilon_{479\text{nm}} = 2000\text{ M}^{-1}\text{ cm}^{-1}$ .  $^1\text{H}$  NMR (400 MHz,  $\text{CD}_2\text{Cl}_2$ ):  $\delta$  9.01 (s, 1H), 7.83 (s, 1H), 7.80 (s, 1H), 7.51 (s, 1H), 7.42 (dd,  $J = 7.2, 1.7\text{ Hz}$ , 1H), 7.23 (s, 1H), 7.09 (s, 1H), 6.90 (td,  $J = 7.6, 1.8\text{ Hz}$ , 1H), 6.69 (td,  $J = 7.2, 1.4\text{ Hz}$ , 1H), 6.46 (dd,  $J = 8.0, 1.3\text{ Hz}$ , 1H), 3.94 (s, 3H), 1.41 (s, 9H), 1.34 (s, 9H).  $^{13}\text{C}\{^1\text{H}\}$  NMR (100 MHz,  $\text{CD}_2\text{Cl}_2$ )  $\delta$  163.3, 151.9, 137.8, 134.5, 128.3, 124.1, 123.5, 119.8, 117.8, 117.0, 109.8, 56.2, 35.7, 30.4, 30.2. FT-IR (ATR,  $\text{cm}^{-1}$ ): 3113, 3067, 3042, 2956, 2904, 2869, 1610, 1558, 1493, 1473, 1454, 1442, 1419, 1408, 1367, 1337, 1278, 1247, 1226, 1175, 1038, 1020, 898, 869, 854, 838, 783, 744, 720, 603, 571.

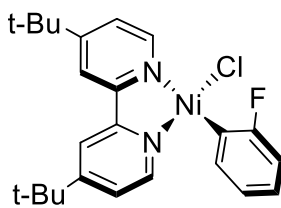

$\text{Ni}(\text{tBu})_2\text{bpy}(\text{FPh})\text{Cl}$ , **4B**. *Method of oxidative addition.* The general procedure for the synthesis of **1B** was followed, save 0.6 mL of 1-chloro-2-fluorobenzene was added as aryl halide. A red solution was afforded upon stirring for 30 minutes at room temperature. The solid was precipitated with pentanes (10 mL), washed with copious hexanes and pentane (3x5 mL), then dried (0.279 g, 84% yield). UV-vis (THF):  $\lambda = 447\text{ nm}$ ,  $\epsilon_{447\text{nm}} = 1699\text{ M}^{-1}\text{ cm}^{-1}$ . UV-vis (Toluene):  $\lambda = 463\text{ nm}$ ,  $\epsilon_{463\text{nm}} = 857\text{ M}^{-1}\text{ cm}^{-1}$ .  $^1\text{H}$  NMR (400 MHz,  $\text{CD}_2\text{Cl}_2$ ):  $\delta$  8.98 (s, 1H), 7.85 – 7.81 (m, 2H), 7.55 – 7.45 (m, 2H), 7.28 – 7.22 (m, 1H), 7.15 (dd,  $J = 17.0, 7.8\text{ Hz}$ , 1H), 6.93 – 6.85 (m, 2H), 6.63 – 6.58 (m, 1H), 1.42 – 1.33 (m, 18H).  $^{13}\text{C}\{^1\text{H}\}$  NMR (100 MHz,  $\text{CD}_2\text{Cl}_2$ )  $\delta$  165.7 (d,  $J_{\text{CF}} = 227\text{ Hz}$ ), 163.4, 162.8, 155.4, 151.21, 148.6, 138.1 (d,  $J_{\text{CF}} = 17\text{ Hz}$ ), 128.0 (d,  $J_{\text{CF}} = 80\text{ Hz}$ ), 123.8 (d,  $J_{\text{CF}} = 7\text{ Hz}$ ), 122.9, 121.8, 117.3, 116.6, 112.6 (d,  $J_{\text{CF}} = 28\text{ Hz}$ ), 34.8, 29.4.  $^{19}\text{F}$  NMR (400 MHz,  $\text{CD}_2\text{Cl}_2$ ):  $\delta$  -95.60 (s). FT-IR (ATR,  $\text{cm}^{-1}$ ): 3351, 3052, 2959, 2871, 1618, 1579, 1545, 1462, 1411, 1312, 1239, 1154, 1111, 1091, 1075, 1018, 901, 860, 838, 763, 735, 677, 639, 602.

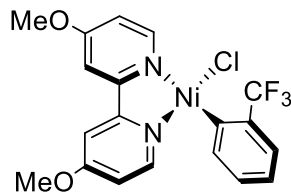

$Ni^{(MeO)bpy}(CF_3Ph)Cl$ , **5A**. *Method of ligand substitution.* In a nitrogen filled glove box, a 20 mL scintillation vial was charged with a Teflon coated stir bar and  $Ni(TMEDA)(CF_3Ph)Cl$  (0.150 g, 0.42 mmol, 1 eq.). To this vial, 4,4'-dimethoxy-2-2'-bipyridine (0.091 g, 0.42 mmol, 1 eq.) and diethyl ether (6 mL) was added. The red/orange mixture was stirred overnight (~12 hrs.) affording a bright yellow solid. The solid was washed with hexanes (2x10 mL) and pentane (2x3 mL), then collected under vacuum (0.150 g, 78% yield). UV-vis (THF):  $\lambda = 432$  nm,  $\epsilon_{432nm} = 1090$  M<sup>-1</sup> cm<sup>-1</sup>. UV-vis (Toluene):  $\lambda = 445$  nm,  $\epsilon_{445nm} = 2400$  M<sup>-1</sup> cm<sup>-1</sup>. <sup>1</sup>H NMR (400 MHz, CD<sub>2</sub>Cl<sub>2</sub>):  $\delta$  8.87 (s, 1H), 8.07 (dd,  $J = 7.5, 1.4$  Hz, 1H), 7.33 – 7.28 (m, 3H), 7.14 – 7.08 (m, 1H), 7.04 – 6.93 (m, 2H), 6.84 (s, 1H), 6.57 (s, 1H), 3.97 (s, 3H), 3.90 (s, 3H). <sup>13</sup>C{<sup>1</sup>H} NMR (100 MHz, CD<sub>2</sub>Cl<sub>2</sub>)  $\delta$  168.3, 167.6, 157.5, 154.5, 153.5, 151.4, 149.5, 138.0, 135.8 (q,  $J_{CF} = 29$  Hz), 128.0, 125.7 (q,  $J_{CF} = 273$  Hz), 125.4, 125.3, 122.8, 111.2, 111.2, 108.1, 107.7. <sup>19</sup>F NMR (400 MHz, CD<sub>2</sub>Cl<sub>2</sub>):  $\delta$  -58.13 (s). FT-IR (ATR, cm<sup>-1</sup>): 3074, 3031, 2980, 2944, 2842, 1611, 1557, 1494, 1471, 1427, 1337, 1309, 1257, 1228, 1157, 1102, 1044, 1023, 923, 854, 768, 735, 677, 639, 576.

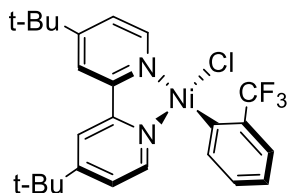

$Ni^{(tBu)bpy}(CF_3Ph)Cl$ , **5B**. *Method of ligand substitution.* In a nitrogen filled glove box, a 20 mL scintillation vial was charged with a Teflon coated stir bar and  $Ni(TMEDA)(CF_3Ph)Cl$  (0.150 g, 0.42 mmol, 1 eq.). To this vial, 4,4'-tert-butyl-2-2'-bipyridine (0.113 g, 0.42 mmol, 1 eq.) and diethyl ether (6 mL) was added. The red/orange mixture was stirred overnight (~12 hrs.) affording a yellow/orange solid. This solid was washed with hexanes (2x10 mL) and pentane (2x3 mL), then collected under vacuum (0.153 g, 72% yield). UV-vis (THF):  $\lambda = 443$  nm,  $\epsilon_{443nm} = 1220$  M<sup>-1</sup> cm<sup>-1</sup>. UV-vis (Toluene):  $\lambda = 461$  nm,  $\epsilon_{461nm} = 1890$  M<sup>-1</sup> cm<sup>-1</sup>. <sup>1</sup>H NMR (400 MHz, CD<sub>2</sub>Cl<sub>2</sub>):  $\delta$  8.99 (s, 1H), 8.05 (d,  $J = 7.6$  Hz, 1H), 7.82 (s, 2H), 7.52 (s, 1H), 7.31 (d,  $J = 7.8$  Hz, 1H), 7.11 (q,  $J = 11.0, 9.2$  Hz, 2H), 6.98 (t,  $J = 7.5$  Hz, 2H), 1.41 (s, 9H), 1.34 (s, 9H). <sup>13</sup>C{<sup>1</sup>H} NMR (100 MHz, CD<sub>2</sub>Cl<sub>2</sub>)  $\delta$  164.3, 163.6, 156.1, 153.1, 151.7, 149.8, 149.5, 137.8, 135.6 (q,  $J_{CF} = 29$  Hz), 128.0, 125.6 (q,  $J_{CF} = 273$  Hz) 125.4, 123.6, 122.8, 117.9, 117.3, 35.7, 30.3. <sup>19</sup>F NMR (400 MHz, CD<sub>2</sub>Cl<sub>2</sub>):  $\delta$  -58.08 (s). FT-IR (ATR, cm<sup>-1</sup>): 2961, 2906, 2869, 1618, 1579, 1545, 1411, 1365, 1312, 1239, 1154, 1111, 1091, 1075, 1018, 901, 860, 838, 763, 735, 677, 640, 602.

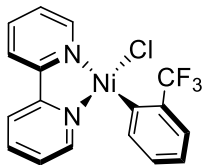

$Ni(Hbpy)(CF_3Ph)Cl$ , **5C**. *Method of ligand substitution.* In a nitrogen filled glove box, a 20 mL scintillation vial was charged with a Teflon coated stir bar and  $Ni(TMEDA)(CF_3Ph)Cl$  (0.130 g, 0.37 mmol, 1 eq.). To this vial, 2-2'-bipyridine (0.060 g, 0.38 mmol, 1 eq.) and diethyl ether (6 mL) was added. The red/orange mixture was stirred overnight (~12 hrs.) affording an orange solid. This solid was washed with hexanes (2x10 mL) and pentane (2x3 mL), then collected under vacuum (0.110 g, 75% yield). UV-vis (THF):  $\lambda = 453$  nm,  $\epsilon_{453nm} = 1110$  M<sup>-1</sup> cm<sup>-1</sup>. UV-vis (Toluene):  $\lambda = 470$  nm,  $\epsilon_{470nm} = 930$  M<sup>-1</sup> cm<sup>-1</sup>. <sup>1</sup>H NMR (400 MHz, CD<sub>2</sub>Cl<sub>2</sub>):  $\delta$  9.17 (s, 1H), 8.04 (d,  $J = 7.5$  Hz, 2H), 7.91 (s, 3H), 7.56 (s, 1H), 7.37 – 7.27 (m, 1H), 7.13 (d,  $J = 7.0$  Hz, 3H), 7.00 (t,  $J = 7.6$  Hz, 1H). <sup>19</sup>F NMR (400 MHz, CD<sub>2</sub>Cl<sub>2</sub>):  $\delta$  -58.11 (s). <sup>13</sup>C{<sup>1</sup>H} NMR (100 MHz, CD<sub>2</sub>Cl<sub>2</sub>)  $\delta$  156.2, 153.1, 152.4, 150.3, 148.9, 139.6, 138.8, 137.8, 135.6 (q,  $J_{CF} = 29$  Hz), 128.3, 126.6, 125.6 (q,  $J_{CF} = 4$  Hz), 125.6 (q,  $J_{CF} = 273$  Hz), 123.1, 121.2, 120.6. FT-IR (ATR, cm<sup>-1</sup>): 3113, 3054, 3033, 1607, 1578, 1553, 1473, 1446, 1425, 1308, 1237, 1163, 1150, 1098, 1074, 1021, 759, 735, 727, 675, 638.

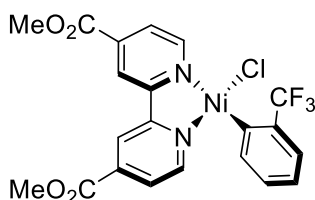

$Ni(CH_3OOCbpy)(CF_3Ph)Cl$ , **5D**. *Method of ligand substitution.* In a nitrogen filled glove box, a 25 mL Schlenk flask was charged with a Teflon coated stir bar and  $Ni(TMEDA)(CF_3Ph)Cl$  (0.110 g, 0.309 mmol, 1 eq.). To this vial, dimethyl-2,2'-bipyridine-4,4'-dicarboxylate (0.108 g, 0.396 mmol, 1.3 eq.) was added along with 10 mL of 6:1 heptane/toluene solution. The flask was attached to the nitrogen Schlenk line, and the brown/orange mixture was stirred at 65 °C. After 10 hours, the Schlenk flask was brought back into the glove box where it was cooled in the freezer (-35 °C) for ten minutes precipitating a pale red/purple solid. This solid was collected by vacuum filtration, washed with pentanes (3x5 mL), ether (2x3 mL), and hexanes (3x5 mL). The solid was dried under vacuum (0.110 g, 72% yield). UV-vis (THF):  $\lambda = 497$  nm,  $\epsilon_{497nm} = 1830$  M<sup>-1</sup> cm<sup>-1</sup>. UV-vis (Toluene):  $\lambda = 513$  nm,  $\epsilon_{513nm} = 2370$  M<sup>-1</sup> cm<sup>-1</sup>. <sup>1</sup>H NMR (400 MHz, CD<sub>2</sub>Cl<sub>2</sub>):  $\delta$  9.44 (s, 1H), 8.58 (s, 1H), 8.53 (s, 1H), 8.13 (s, 1H), 8.05 – 7.94 (m, 1H), 7.67 (s, 1H), 7.36 (d,  $J = 8.5$  Hz, 2H), 7.18 (d,  $J = 8.9$  Hz, 1H), 7.04 (s, 1H), 4.03 (s, 3H), 3.98 (s, 3H). <sup>13</sup>C{<sup>1</sup>H} NMR (100 MHz, CD<sub>2</sub>Cl<sub>2</sub>)  $\delta$  164.3, 164.1, 156.3, 153.3, 153.1, 151.4, 147.5, 140.7, 139.5, 137.4, 135.4 (q,  $J_{CF} = 29$  Hz) 129.5, 128.7, 126.4, 126.1, 125.9 (q,  $J_{CF} = 4$  Hz), 125.5 (q,  $J_{CF} = 273$  Hz), 123.5, 121.4, 121.2, 120.6. <sup>19</sup>F NMR (400 MHz, CD<sub>2</sub>Cl<sub>2</sub>):  $\delta$  -58.21 (s). FT-IR (ATR, cm<sup>-1</sup>): 3088, 3063, 3044, 2981, 2961, 2860, 1725, 1578, 1558, 1435, 1401, 1326, 1309, 1254, 1232, 1150, 1092, 1022, 952, 902, 842, 765, 715, 677, 639.

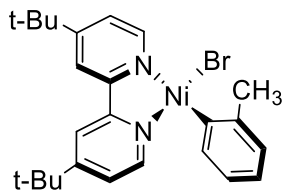

$Ni^{(tBu)_2bpy}(CH_3Ph)Br$ , **1B-Br**. *Method of oxidative addition.* The general procedure for the synthesis of **1B** was followed, except 0.6 mL of 2-bromotoluene was used as aryl halide. After 30 minutes of stirring at room temperature, the mixture became a red solution. Pentanes (10 mL) was used to precipitate the orange solid. The vial was placed in the freezer (-35 °C) for ten minutes to complete precipitation. The solid was collected by filtration, washed with hexanes (3x3 mL) and pentanes (3x3 mL), then dried under vacuum (0.348 g, 96% yield). UV-vis (THF):  $\lambda = 479$  nm.  $^1H$  NMR (400 MHz,  $CD_2Cl_2$ ):  $\delta$  9.25 (d,  $J = 5.9$  Hz, 1H), 7.85 (d,  $J = 2.0$  Hz, 1H), 7.81 (d,  $J = 2.1$  Hz, 1H), 7.52 (dd,  $J = 8.3, 6.5, 1.8$  Hz, 2H), 7.12 (dd,  $J = 6.2, 2.1$  Hz, 1H), 7.03 (d,  $J = 6.2$  Hz, 1H), 6.84 – 6.70 (m, 3H), 3.02 (s, 3H), 1.41 (s, 9H), 1.34 (s, 9H).  $^{13}C\{^1H\}$  NMR (100 MHz,  $CD_2Cl_2$ )  $\delta$  162.7, 162.4, 162.4, 156.5, 154.5, 152.1, 152.0, 139.1, 138.9, 124.7, 123.8, 122.7, 113.6, 113.3, 35.7, 30.3, 25.6. FT-IR (ATR,  $cm^{-1}$ ): 3038, 2961, 2903, 2868, 1615, 1543, 1455, 1408, 1363, 1251, 1201, 1016, 899, 862, 839, 735, 650, 601.

#### S1.4. X-ray Crystallography.

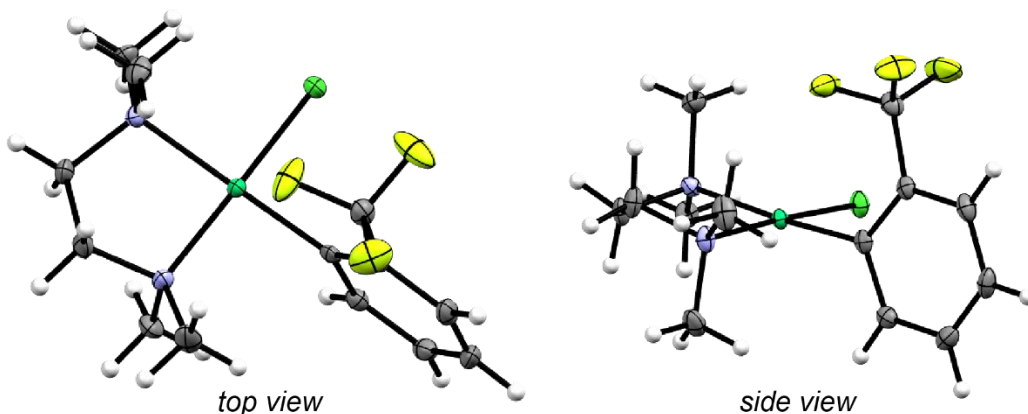

**Figure S2.** Top down and side views of the refined crystal structure of Ni(TMEDA)(CF<sub>3</sub>Ph)Cl. Structure resembled refinement from a previous report.<sup>4</sup>

#### Collection and refinement details for Ni(TMEDA)(CF<sub>3</sub>Ph)Cl.

Low-temperature diffraction data ( $\phi$ - and  $\omega$ -scans) were collected on a Bruker AXS D8 VENTURE KAPPA diffractometer coupled to a PHOTON II CPAD detector with Mo  $K_{\alpha}$  radiation ( $\lambda = 0.71073 \text{ \AA}$ ) from an  $I\mu\text{S}$  micro-source. The structure was solved by direct methods using SHELXS and refined against  $F^2$  on all data by full-matrix least squares with SHELXL-2017 using established refinement techniques. All non-hydrogen atoms were refined anisotropically. All hydrogen atoms were included into the model at geometrically calculated positions and refined using a riding model. The isotropic displacement parameters of all hydrogen atoms were fixed to 1.2 times the  $U$  value of the atoms they are linked to (1.5 times for methyl groups). The compound crystallizes in the monoclinic space group  $P2_1/n$  with one molecule in the asymmetric unit. These data are provided free of charge from The Cambridge Crystallographic Data Centre by The Cambridge Crystallographic Data Centre.

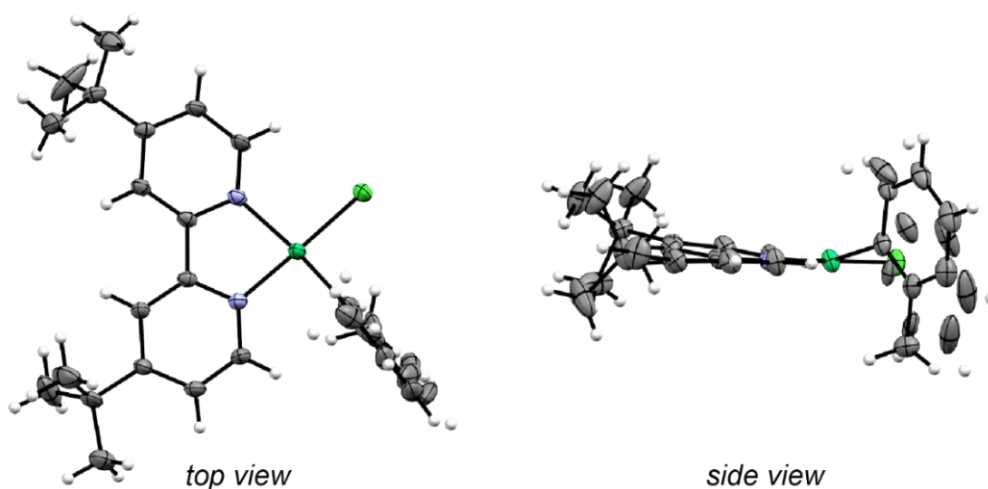

**Figure S3.** Top down and side views of the refined crystal structure of 1B. Structure resembles previous refinement.<sup>5</sup>

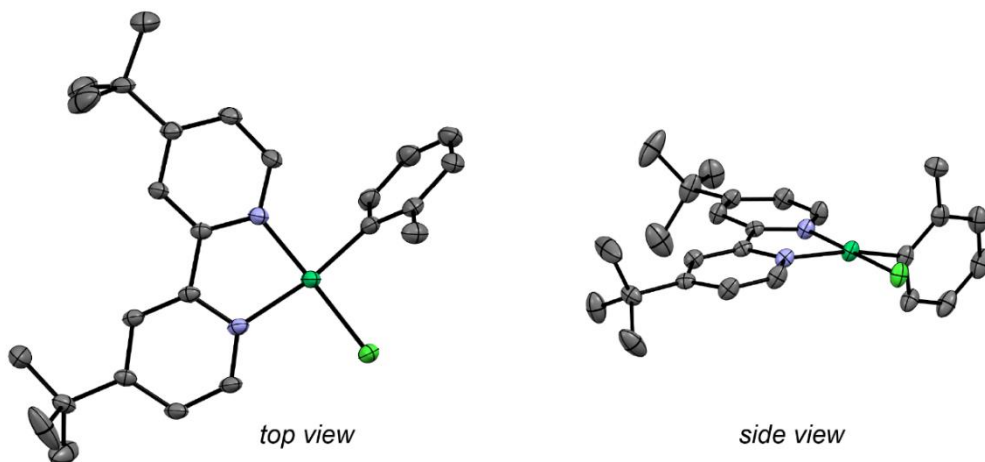

**Figure S4.** Top down and side views of the refined crystal structure of **1B**, showing only one aryl ligand conformer with hydrogens hidden for clarity.

**Collection and refinement details for Ni(<sup>tbu</sup>bpy)(CH<sub>3</sub>Ph)Cl, **1B**.**

Low-temperature diffraction data ( $\phi$ - and  $\omega$ -scans) were collected on a Bruker AXS KAPPA APEX II diffractometer coupled to a PHOTON 100 CMOS detector with graphite monochromated Mo  $K\alpha$  radiation ( $\lambda = 0.71073 \text{ \AA}$ ). The structure was solved by direct methods using SHELXS and refined against  $F^2$  on all data by full-matrix least squares with SHELXL-2017 using established refinement techniques. All non-hydrogen atoms were refined anisotropically. All hydrogen atoms were included into the model at geometrically calculated positions and refined using a riding model. The isotropic displacement parameters of all hydrogen atoms were fixed to 1.2 times the  $U$  value of the atoms they are linked to (1.5 times for methyl groups). All disordered atoms were refined with the help of similarity restraints on the 1,2- and 1,3-distances and displacement parameters as well as enhanced rigid bond restraints for anisotropic displacement parameters. Compound **1B** crystallizes in the monoclinic space group  $P2_1/c$  with one molecule in the asymmetric unit. One of the ligands is disordered over two positions. The highest residual electron density is located in a position that indicates additional disorder in one of the *tert*-butyl groups. Refinement of additional disorder did not lead to a stable refinement. These data are provided free of charge from The Cambridge Crystallographic Data Centre by The Cambridge Crystallographic Data Centre.

### S1.5. Steady-State UV-vis Spectroscopy.

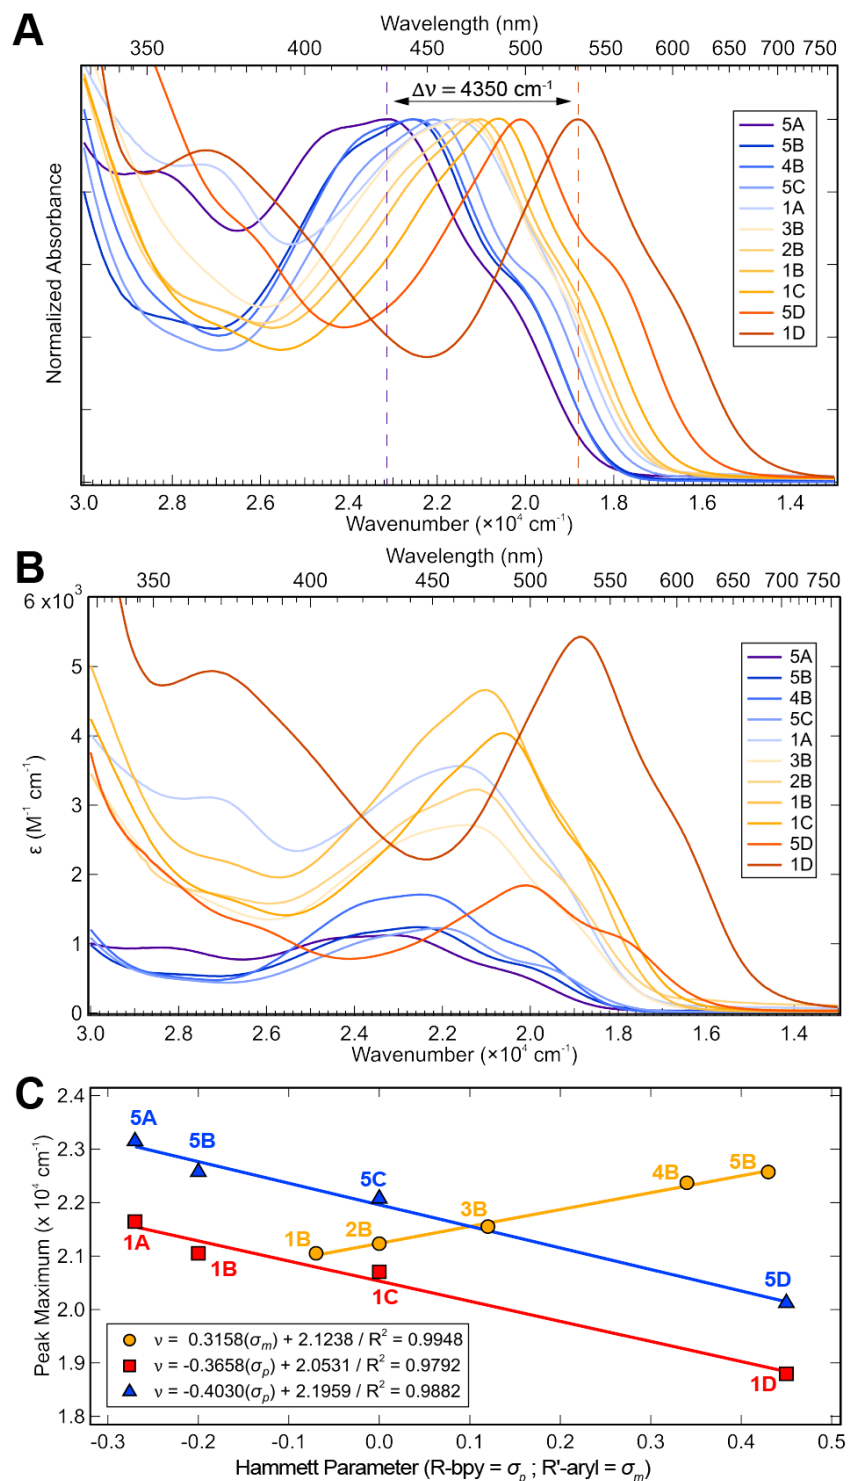

**Figure S5.** (A) Normalized and (B) extinction coefficient scaled UV-vis spectra in tetrahydrofuran (THF) of complexes synthesized here. (C) Correlation between the absorption peak maxima (dashed lines) in THF and the Hammett parameter ( $\sigma_p$ ) for each bpy substituent or ( $\sigma_m$ ) for each aryl substituent.<sup>6</sup> In part duplicated from main text Figure 3 for ease of comparison.

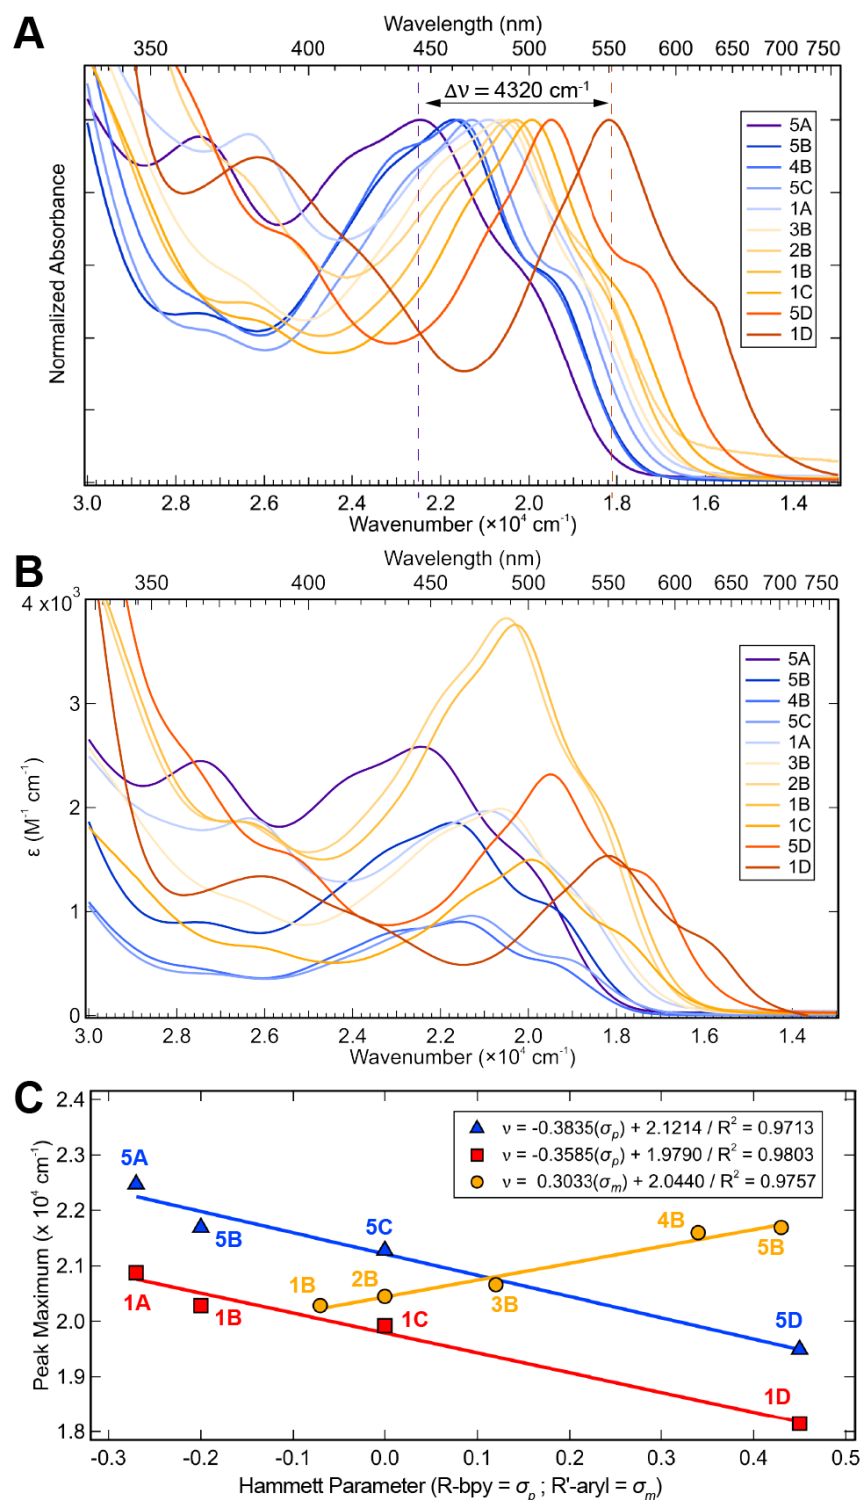

**Figure S6.** (A) Normalized and (B) extinction coefficient scaled UV-vis spectra in toluene of complexes synthesized here. (C) Correlation between the absorption peak maxima (dashed lines) in THF and the Hammett parameter ( $\sigma_p$ ) for each bpy substituent or ( $\sigma_m$ ) for each aryl substituent.<sup>6</sup>



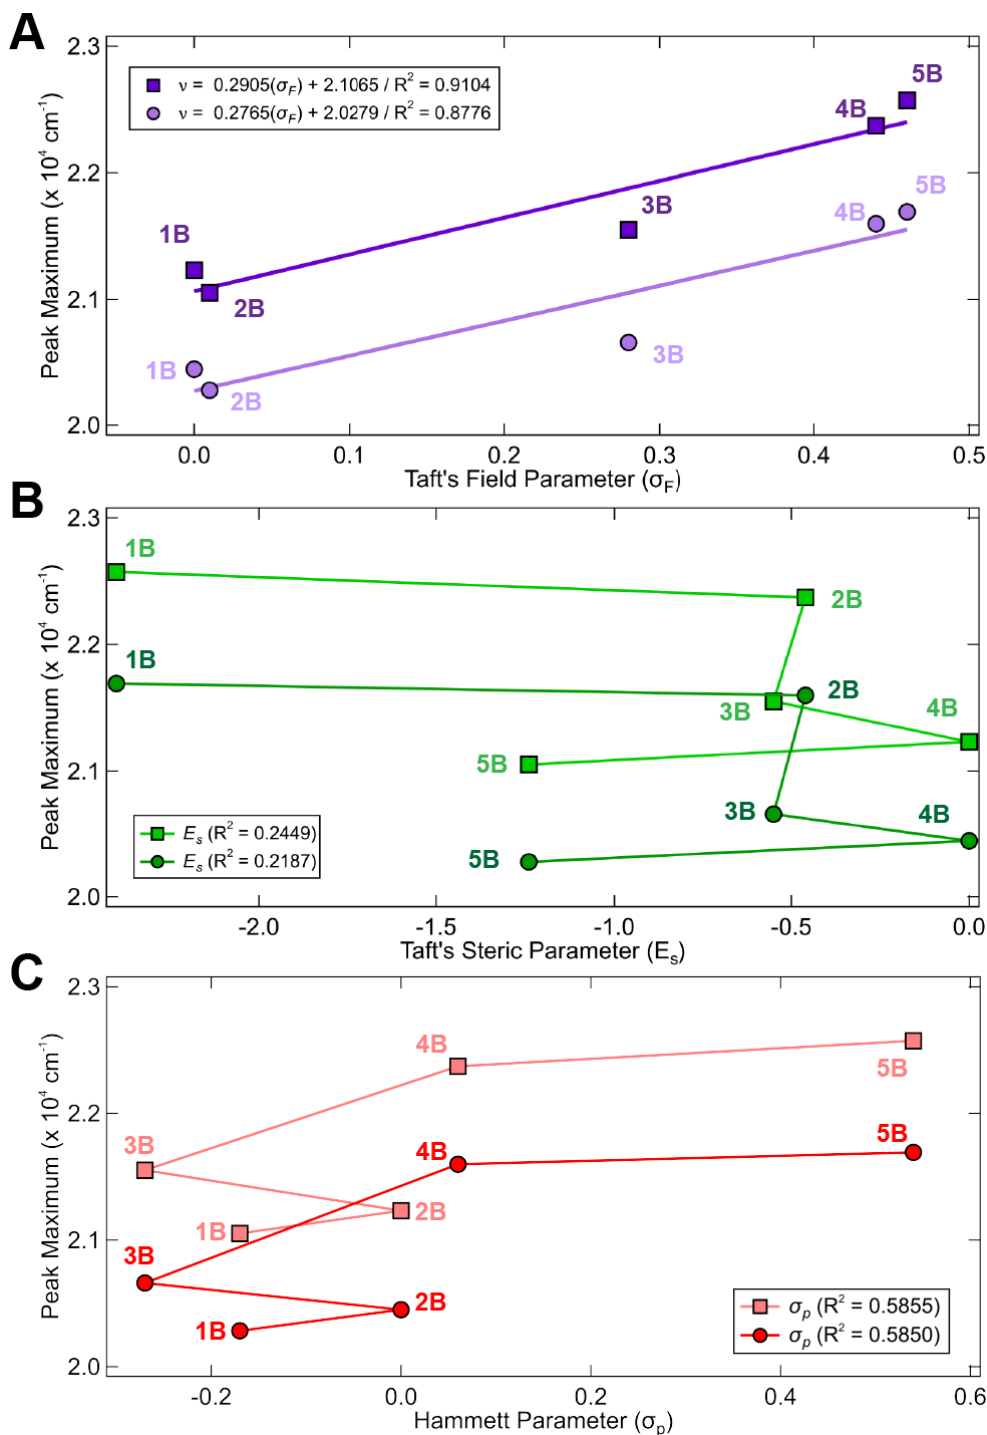

**Figure S7.** (A) Correlation between the absorption peak maxima in THF (dark purple, squares) and toluene (light purple, circles) and Taft's Field parameter ( $\sigma_F$ ) for each aryl substituent. (B) Correlation between the absorption peak maxima in THF (light green, squares) and toluene (dark green, circles) and Taft's steric parameter ( $E_s$ ) for each aryl substituent. (C) Correlation between the absorption peak maxima in THF (pink, squares) and toluene (red, circles) and Hammett's parameter ( $\sigma_p$ ) for each aryl substituent.<sup>6</sup> Correlation coefficients ( $R^2$ ) are given for linear fits.

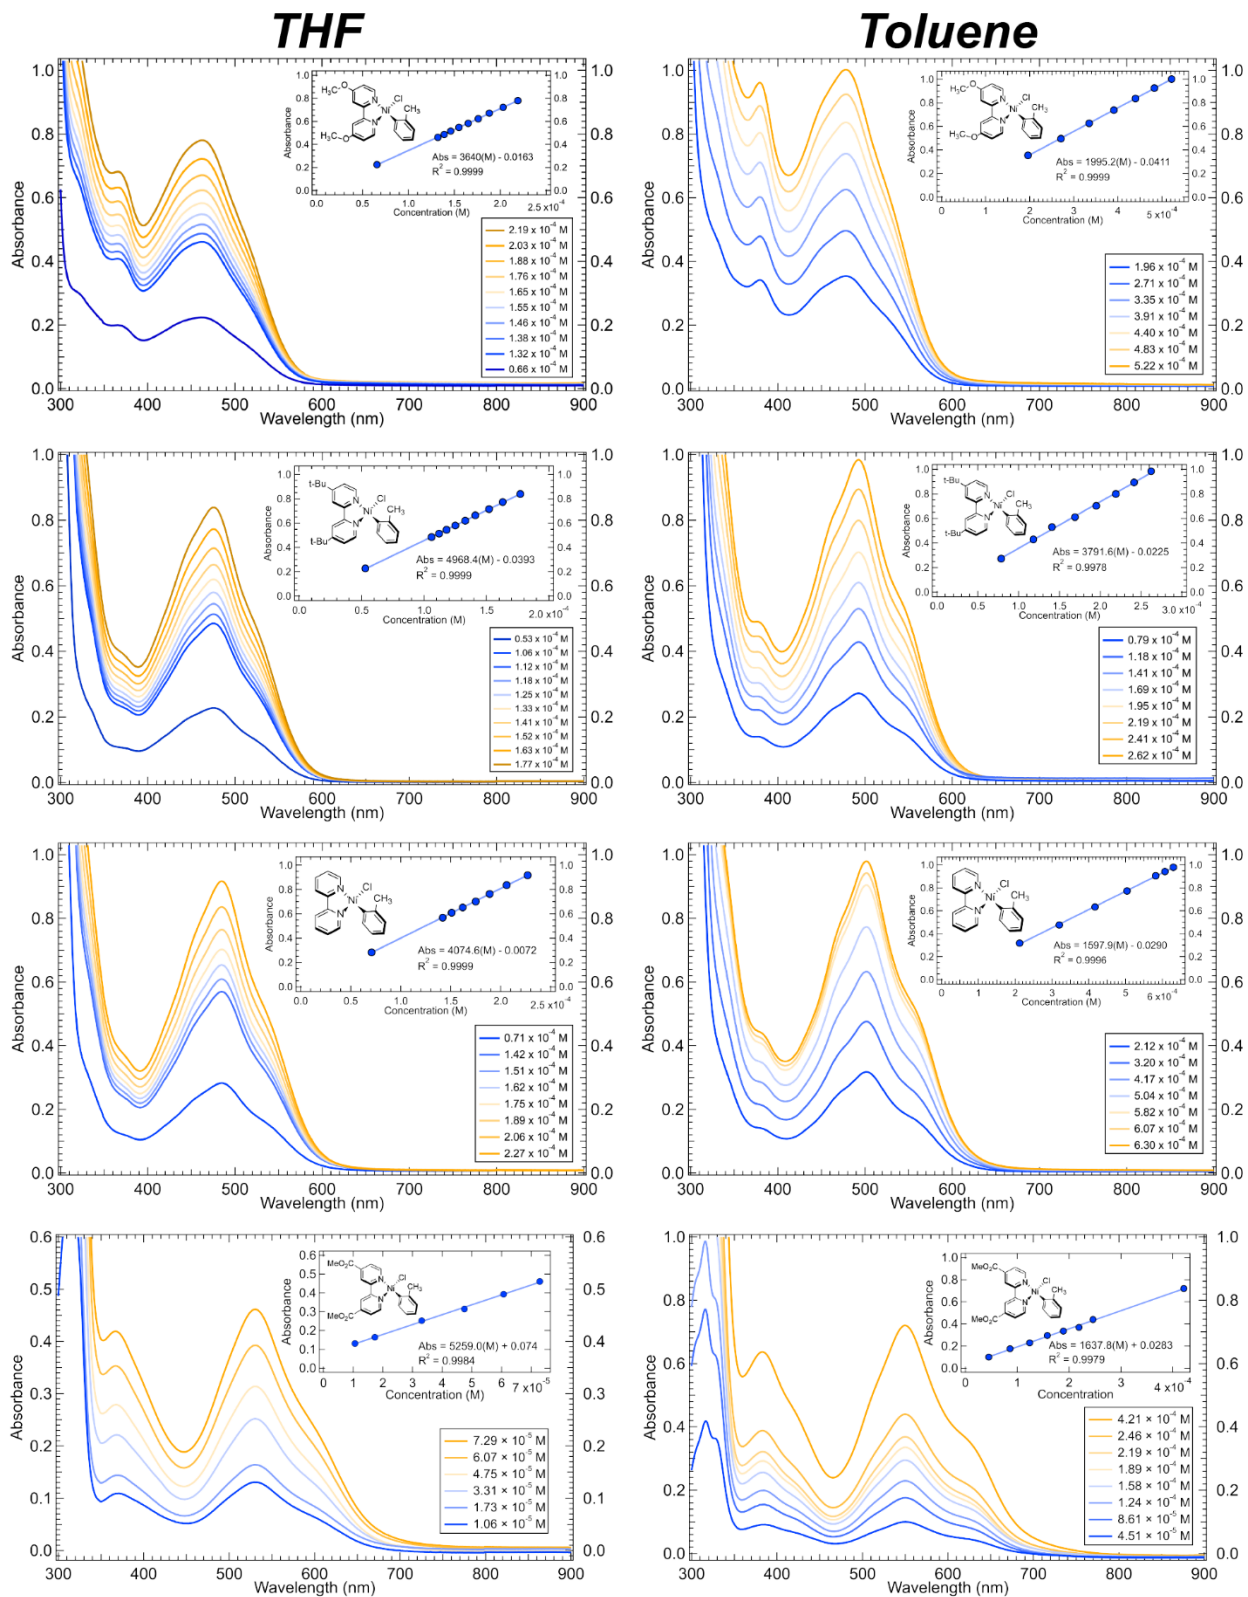

**Figure S8.** Concentration dependent UV-vis spectra in THF (left) and toluene (right) for **1A–1D**. Single wavelength molar absorptivity calibration curves are given as insets on each plot.

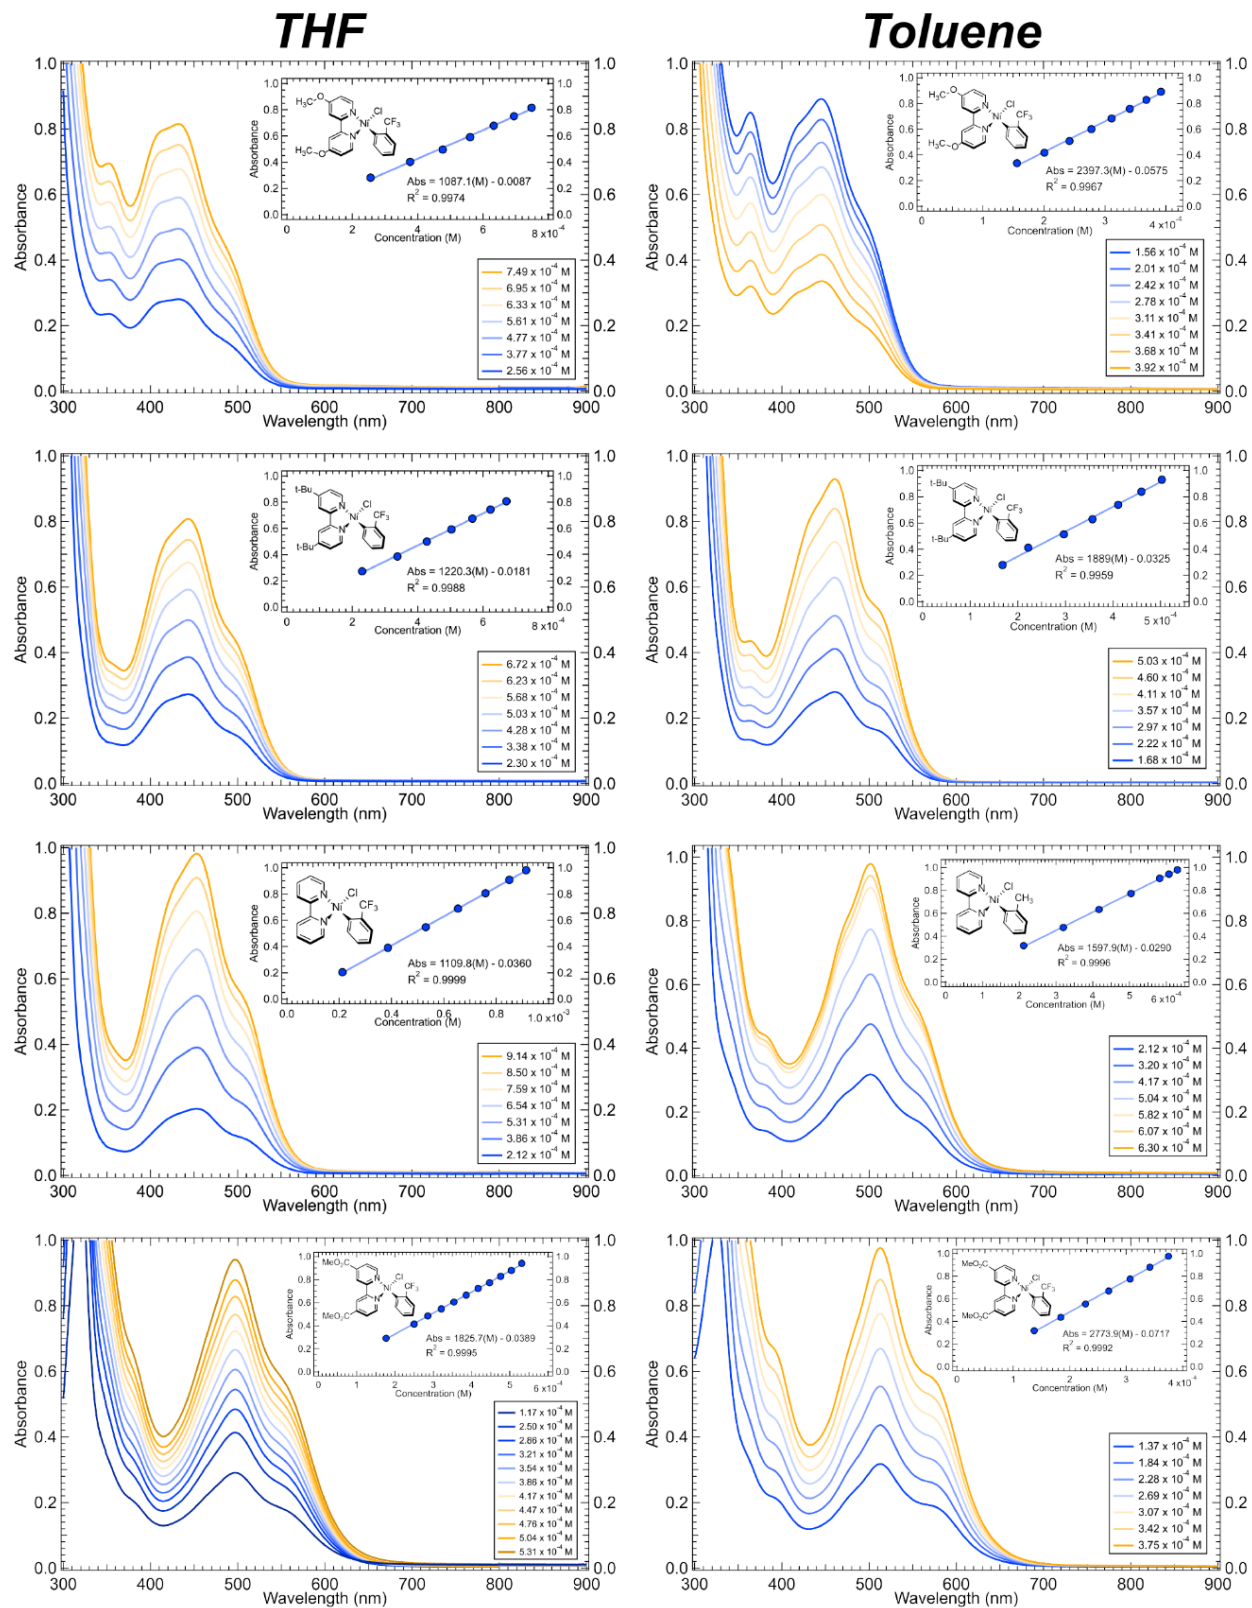

**Figure S9.** Concentration dependent UV-vis spectra in THF (left) and toluene (right) for **5A–5D**. Single wavelength molar absorptivity calibration curves are given as insets on each plot.

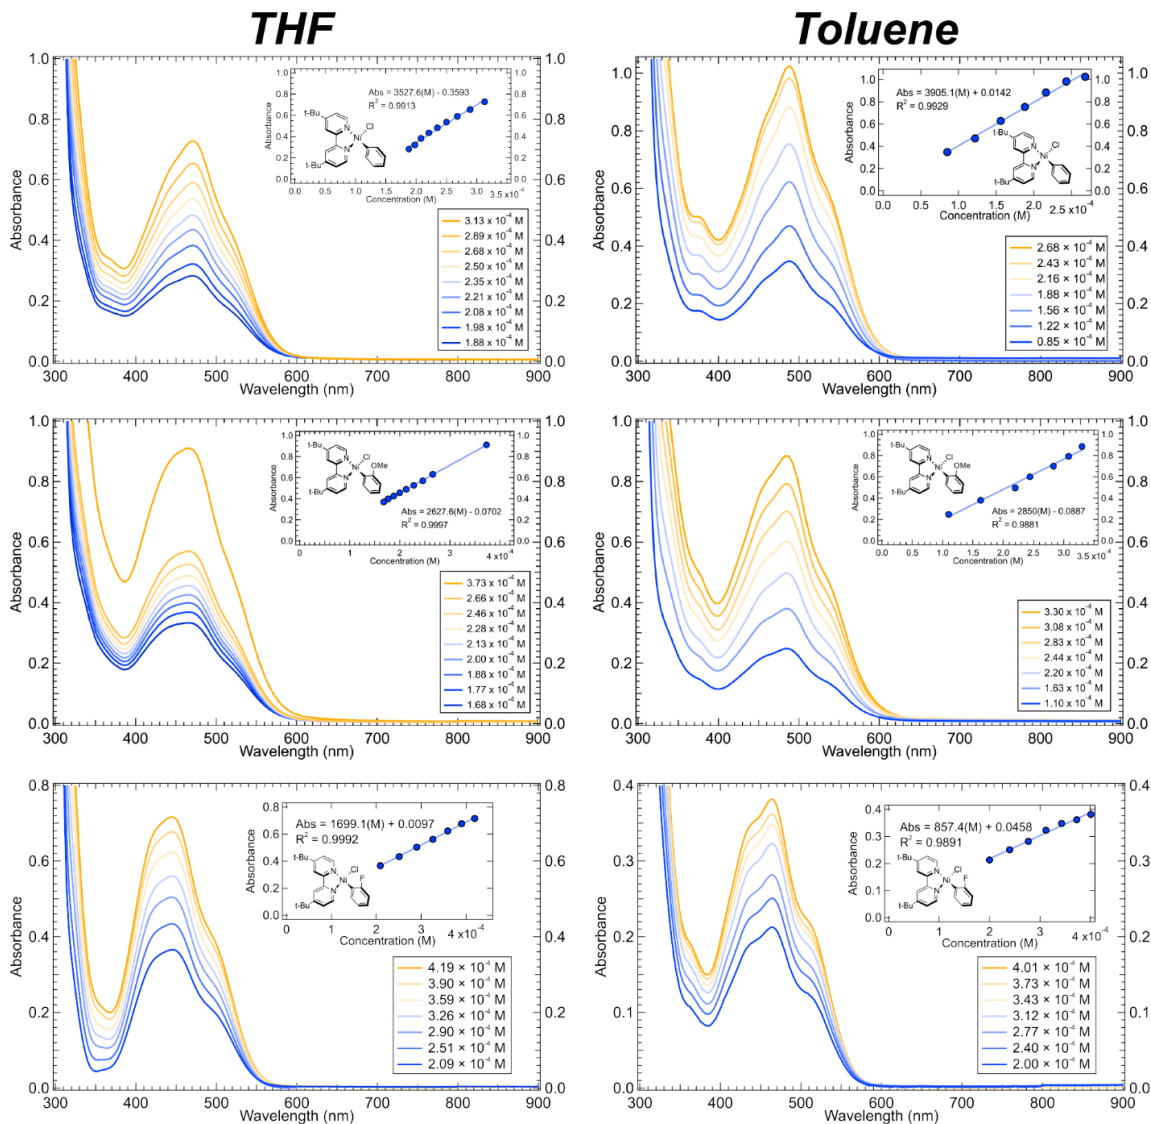

**Figure S10.** Concentration dependent UV-vis spectra in THF (left) and toluene (right) for **2B–4B**. Single wavelength molar absorptivity calibration curves are given as insets on each plot.

**Table S1.** Summary of molar extinction coefficients for **1A–5D** in THF and Toluene.

| Compound  | Solvent = Tetrahydrofuran |                                 | Solvent = Toluene         |                                 |
|-----------|---------------------------|---------------------------------|---------------------------|---------------------------------|
|           | MLCT $\lambda_{max}$ (nm) | $\epsilon$ ( $M^{-1} cm^{-1}$ ) | MLCT $\lambda_{max}$ (nm) | $\epsilon$ ( $M^{-1} cm^{-1}$ ) |
| <b>1A</b> | 462                       | 3640                            | 479                       | 2000                            |
| <b>1B</b> | 475                       | 4970                            | 493                       | 3790                            |
| <b>1C</b> | 483                       | 4070                            | 502                       | 1600                            |
| <b>1D</b> | 532                       | 5259                            | 551                       | 1637                            |
| <b>2B</b> | 471                       | 3530                            | 489                       | 3905                            |
| <b>3B</b> | 464                       | 2660                            | 479                       | 2000                            |
| <b>4B</b> | 447                       | 1699                            | 463                       | 857                             |
| <b>5A</b> | 432                       | 1090                            | 445                       | 2400                            |
| <b>5B</b> | 443                       | 1220                            | 461                       | 1890                            |
| <b>5C</b> | 453                       | 1110                            | 470                       | 930                             |
| <b>5D</b> | 497                       | 1830                            | 513                       | 2370                            |

### S1.6. Photolysis Experiments.

We sought to confirm the formation of aryl radicals upon irradiation of our complexes. To do this, we selected the well characterized compound, **1B**,<sup>2,5,7</sup> as well as the novel compound, **5B**. These span a wide range of photolysis rates and are representative of the entire matrix of complexes, **1A-5D**. Solutions of **1B** and **5B** were prepared in the glovebox (solvent = THF-*d*<sub>8</sub>) and transferred to J-Young tubes. Samples were placed 5 cm away from the Kessil PR160L 390 nm light source, as was typical for a photolysis experiment. Irradiation of **1B** afforded the previously identified radical products, toluene, 2-(*o*-tolyl)tetrahydrofuran, and 2,2'-dimethyl-1,1'-biphenyl (see Figure S11).<sup>5</sup> A concomitant loss of the diagnostic methyl singlet of the *o*-tolyl group at 3.0 ppm was observed. Similarly, the characteristic bipyridine peaks also decrease in intensity, illustrating the loss of the diamagnetic starting material (Figure S12). In the absence of light, however, no degradation of the starting material is observed. At elevated temperatures (55 °C), only minimal degradation is seen. However, thermal degradation does not result in the new product formation, evidenced by the lack of peak formation at 660 nm (Figure S13).

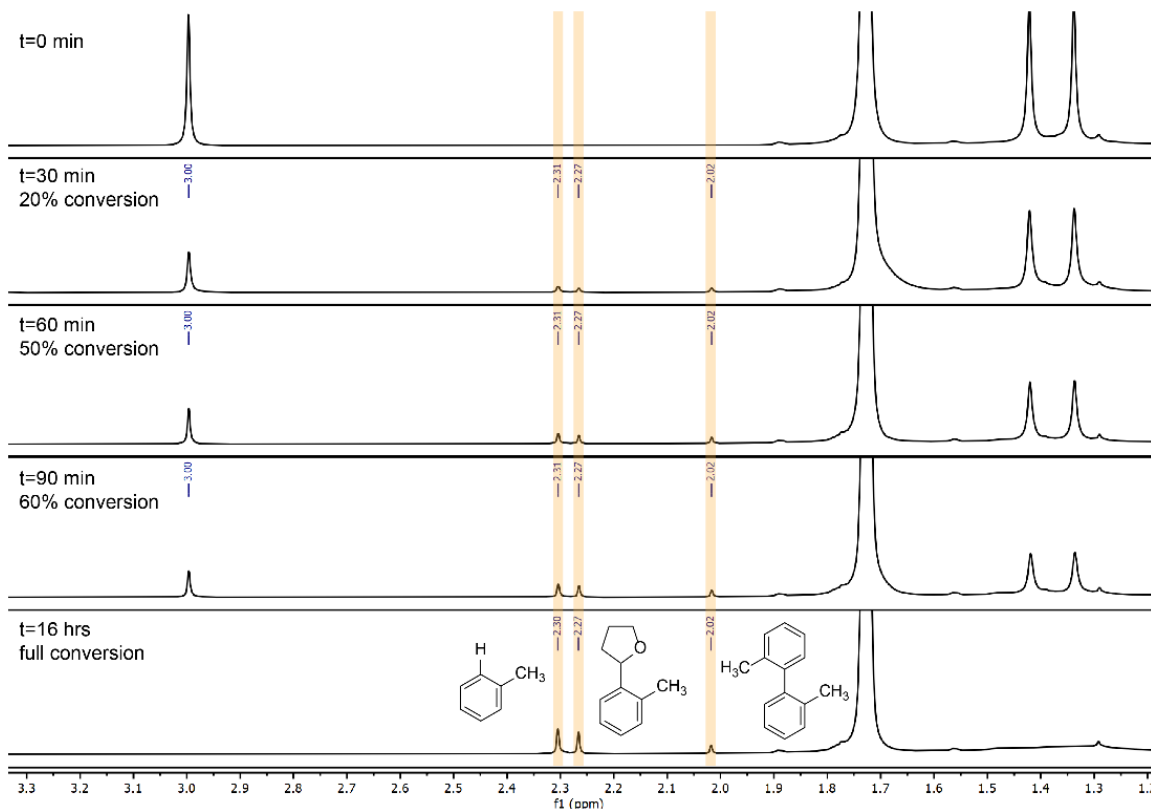

**Figure S11.** Aliphatic region <sup>1</sup>H NMR spectra of the irradiation of **1B** in THF-*d*<sub>8</sub> over time. Aryl radical products are observed at 2.3, 2.27, and 2.02 ppm.

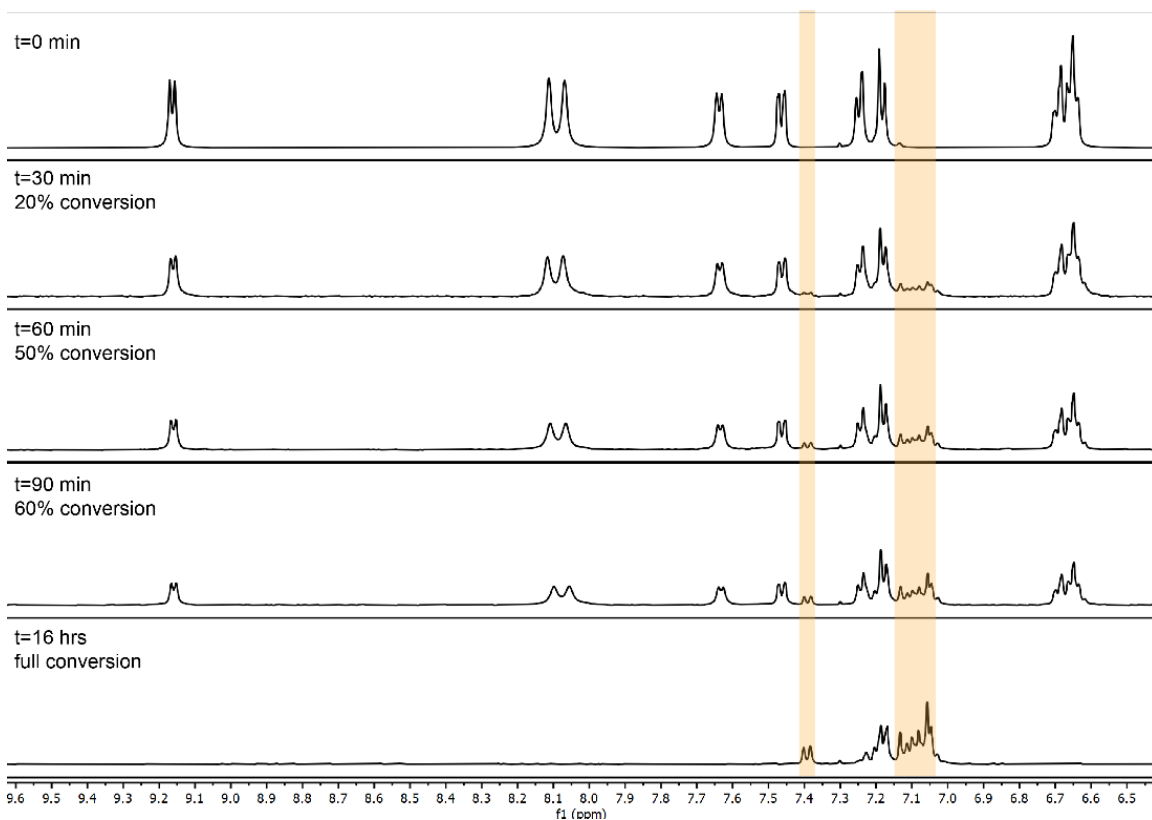

**Figure S12.** Aromatic region  $^1\text{H}$  NMR spectra of the irradiation of **1B** in  $\text{THF-}d_8$  over time. Starting material peaks give way to aryl radical products (highlighted in yellow).

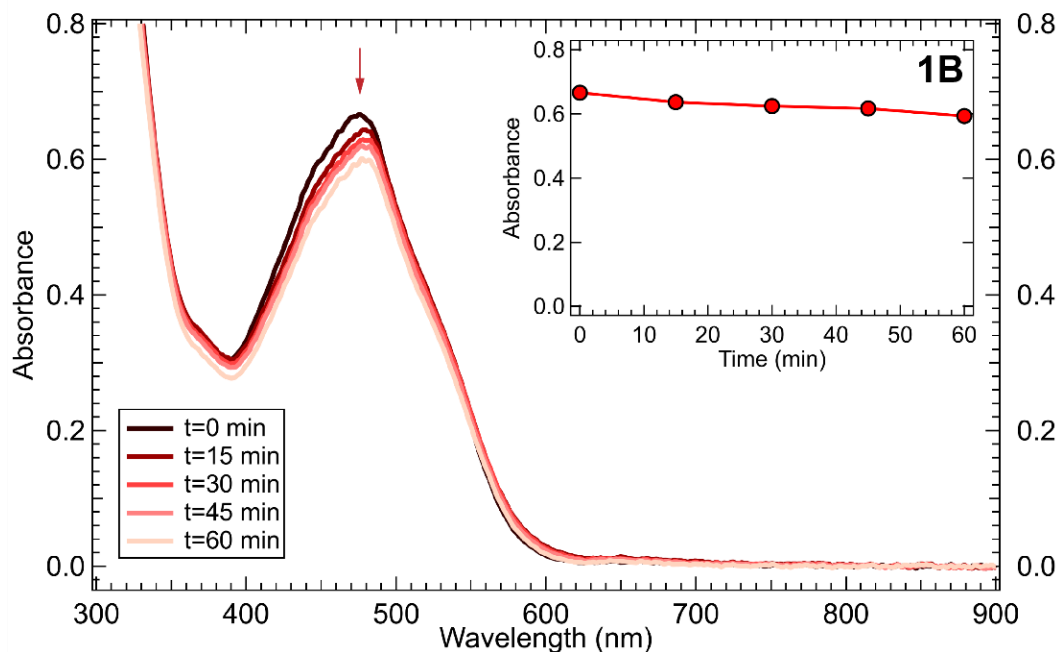

**Figure S13.** Thermal degradation of **1B** in THF at  $55\text{ }^\circ\text{C}$  monitored over an hour. Approximately 10% of the starting material is lost, but no new feature at 660 nm (or elsewhere) is seen.

We also tracked the photolysis of **5B** by  $^{19}\text{F}$  NMR, identifying the aryl radical products,  $\alpha,\alpha,\alpha$ -trifluorotoluene and 2-(2-(trifluoromethyl)phenyl)tetrahydrofuran upon irradiation (Figure S14). The homo-coupled bis-aryl product was not seen, likely the result of the slower photolysis rate for **5B**. Lower production of radicals more significantly impacts the rate of formation of the bis-aryl as it is a second-order kinetic product.

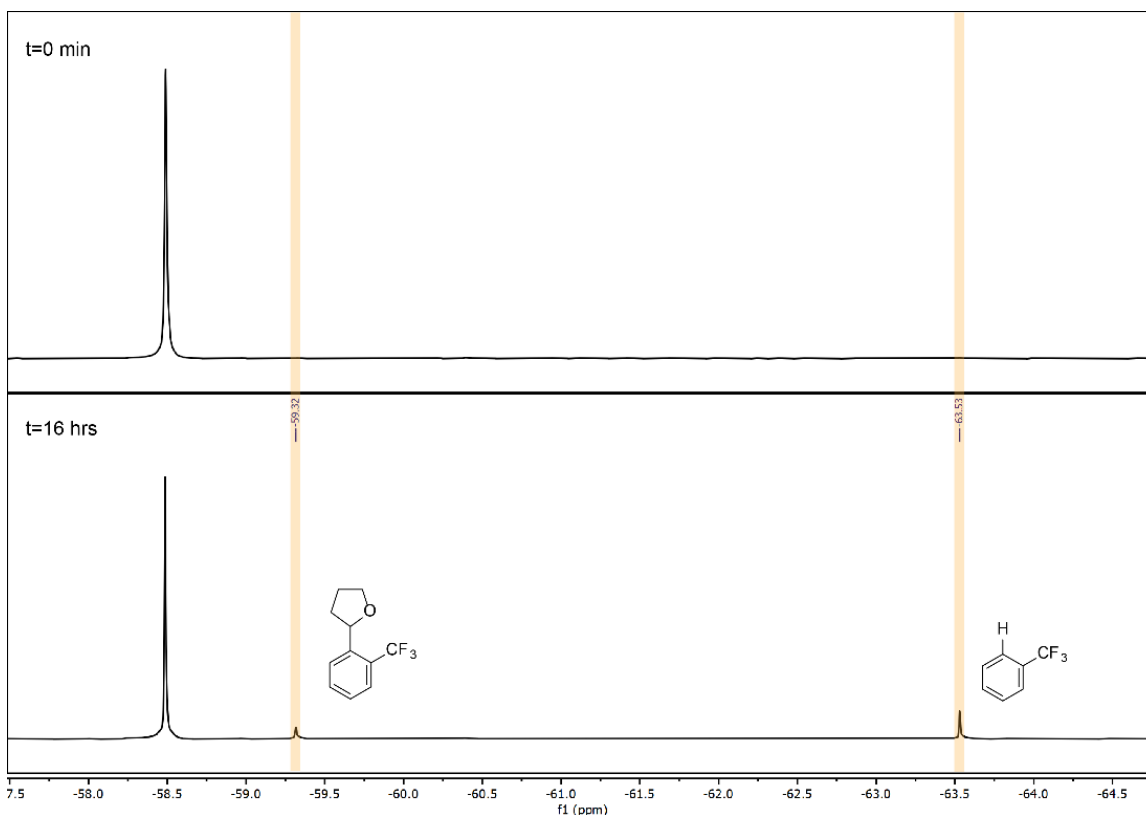

**Figure S14.**  $^{19}\text{F}$  NMR spectra of the irradiation of **5B** in  $\text{THF-}d_8$  over time. Starting material peaks give way to aryl radical products (highlighted in yellow).

Finally, we investigated the photolysis of the pre-catalyst compounds,  $\text{Ni}(\text{TMEDA})(\text{R}'\text{Ph})\text{Cl}$ , ( $\text{R}' = \text{CH}_3, \text{CF}_3$ ). Although these compounds do not contain  $\pi^*$  acceptor orbitals to facilitate a metal-to-ligand charge transfer, we noted a spin-allowed ligand field band at 470 and 483 nm, for  $\text{CH}_3$  and  $\text{CF}_3$  respectively (Figure S15). We conceptualized a possible ligand field [ $\text{Ni } d \rightarrow d(x^2-y^2)$ ] transition, followed by a ligand-to-metal electron transfer step [bonding  $d(x^2-y^2)/\text{C}(sp^2) \rightarrow \text{Ni } d$ ], which would result a reduction of the  $\text{Ni}(\text{II})\text{-C}$  bond order and subsequent bond cleavage. Irradiation of the complexes with 390 nm incident light produces an insoluble precipitate which coats the cuvette walls with an opaque film. Accordingly, we observe an increase in the peak maxima upon irradiation due to light scattering effects (Figure S16). Note that similar behavior is seen when irradiating nearer to the peak maxima (using incident light of 456 nm).

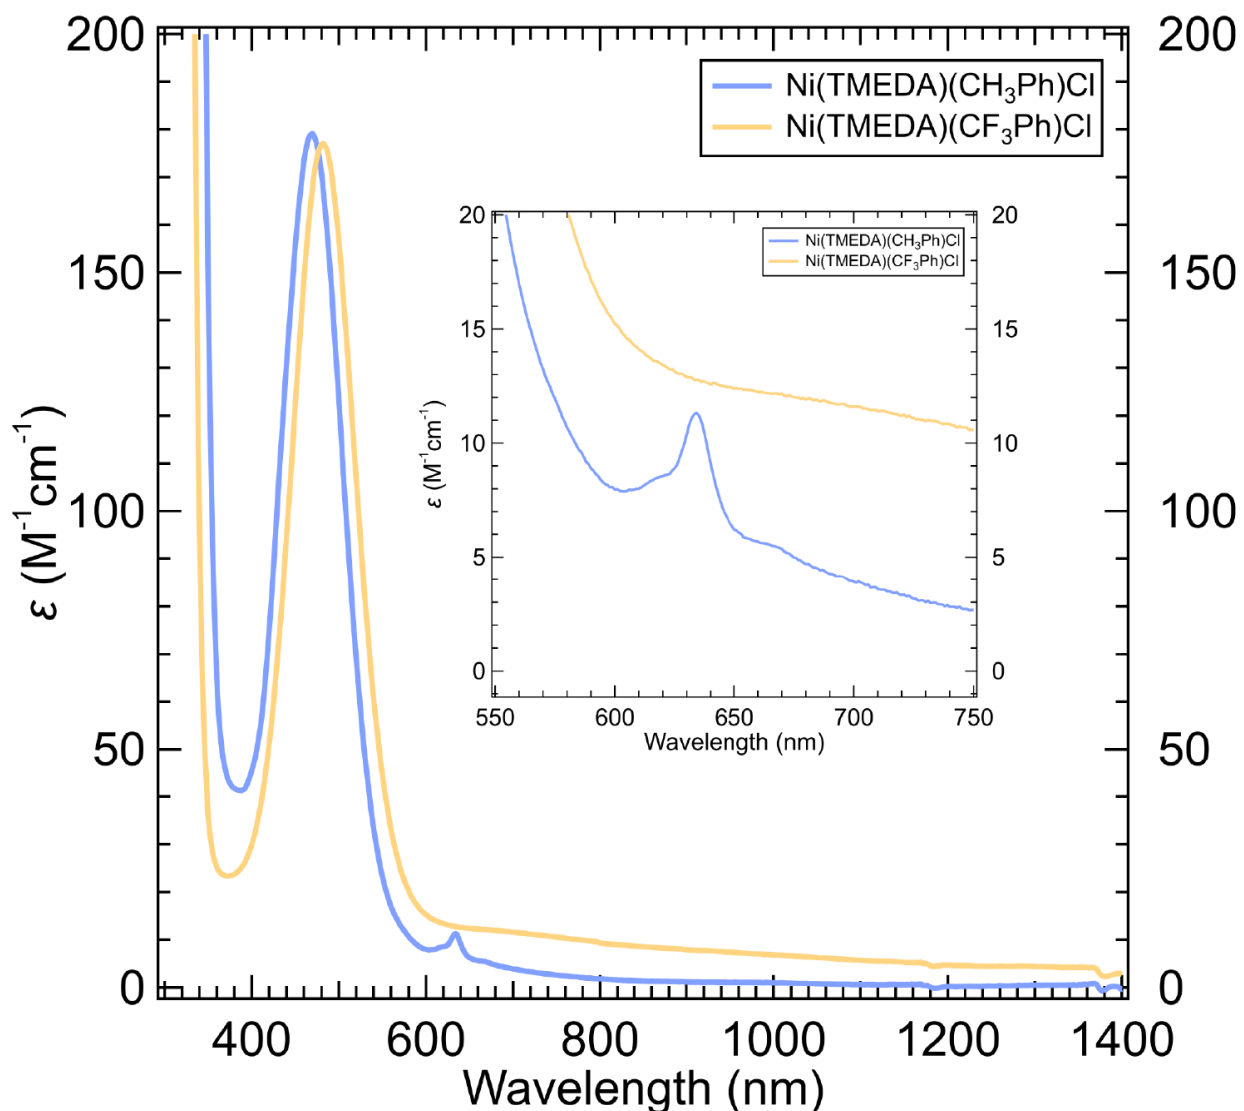

**Figure S15.** UV-vis absorption spectra of  $\text{Ni(TMEDA)(CH}_3\text{Ph)Cl}$  (blue line) and  $\text{Ni(TMEDA)(CF}_3\text{Ph)Cl}$  (orange line) on a molar absorptivity scale. There is a small peak at 635 nm in the *o*-tolyl complex, likely owing to a spin-forbidden  $^3(\text{d-d})$  transition ( $\epsilon = 5\text{-}10 \text{ M}^{-1} \text{ cm}^{-1}$  when accounting for the shift in the baseline). TD-DFT assigns the singlet transition as  $^1[\text{d}(z^2) \rightarrow \text{d}(x^2-y^2)]$ ; the triplet transition is assigned as  $^3[\text{d}(xz) \rightarrow \text{d}(x^2-y^2)]$ . Computational details are given in Table S10.



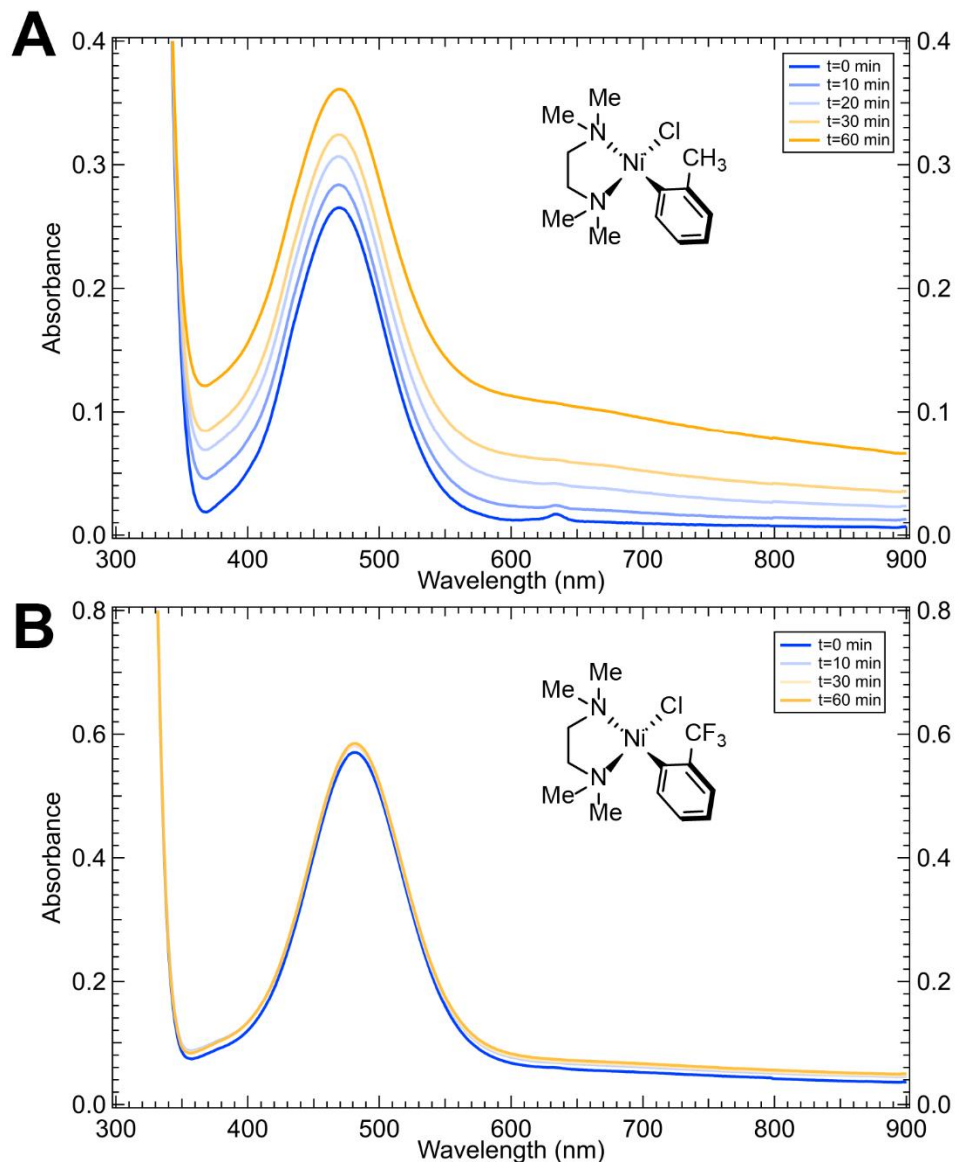

**Figure S16.** Irradiation of Ni(TMEDA)(CH<sub>3</sub>Ph)Cl (panel A) and Ni(TMEDA)(CH<sub>3</sub>Ph)Cl (panel B) using 390 nm light. Note the peak increase in both cases is likely the result of scattering upon precipitation of an insoluble species.

In the same fashion as for **1B** and **5B**, we dissolved these TMEDA complexes in THF-*d*<sub>8</sub>, transferred them to air-tight J-Young tubes, and subjected them to irradiation with 390 nm light. Herein we observed the formation of the same radical products identified previously by NMR, albeit at slower rates (Figure S17-S18). Therefore, these pre-catalyst complexes can undergo light-induced homolysis of the Ni–C bond, likely utilizing the <sup>1</sup>(d-d) state described previously. Indeed, Park et al. found repulsive <sup>1</sup>(d-d) → <sup>3</sup>LMCT photolysis pathways in related Ni(II) complexes.<sup>8</sup>

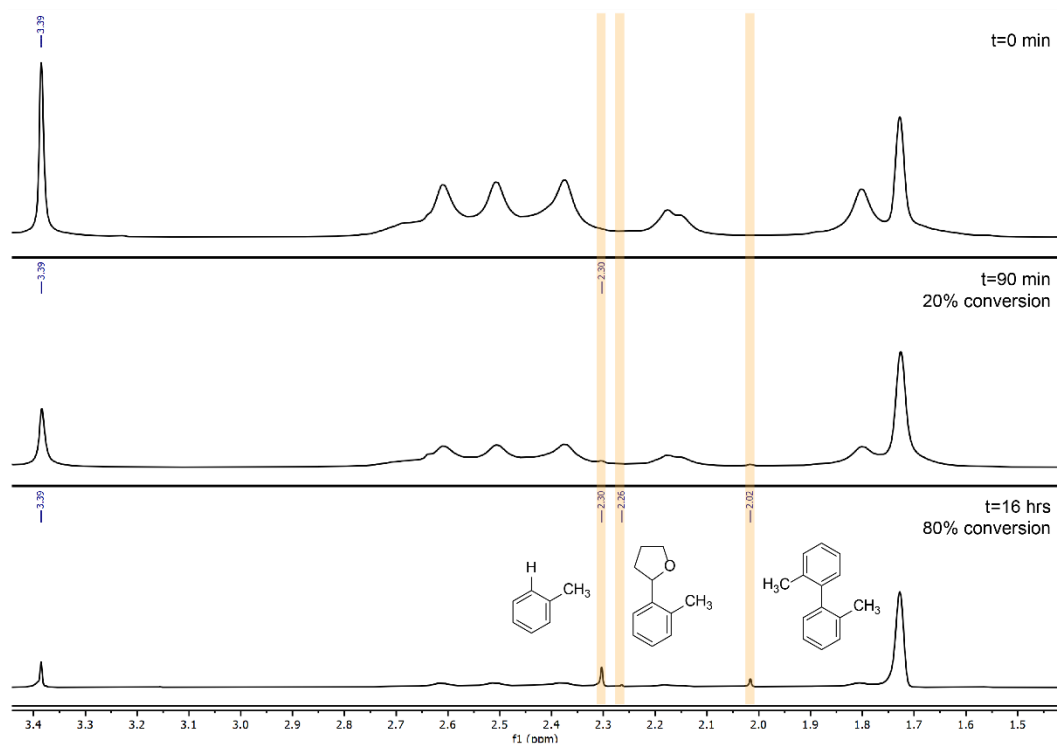

**Figure S17.** Aliphatic region  $^1\text{H}$  NMR spectra of the irradiation of  $\text{Ni}(\text{TMEDA})(\text{CH}_3\text{Ph})\text{Cl}$  in  $\text{THF-}d_8$  over time. Aryl radical products are observed at 2.3, 2.26, and 2.02 ppm.

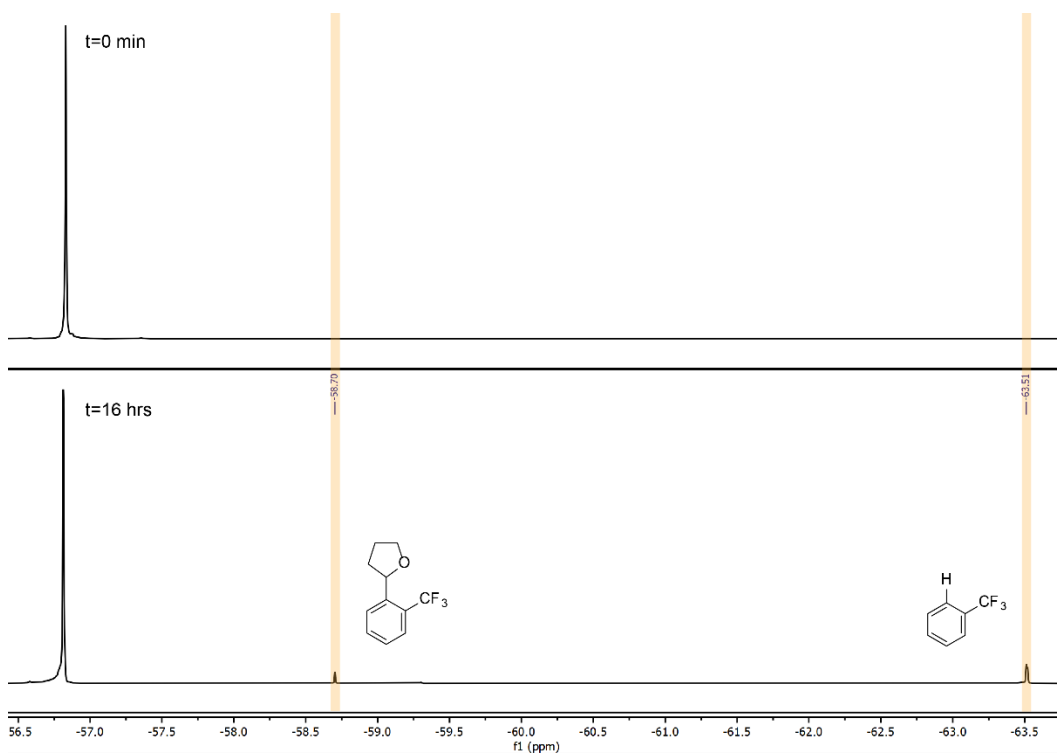

**Figure S18.**  $^{19}\text{F}$  NMR spectra of the irradiation of  $\text{Ni}(\text{TMEDA})(\text{CF}_3\text{Ph})\text{Cl}$  in  $\text{THF-}d_8$  over time. Starting material peaks give way to aryl radical products (highlighted in yellow).

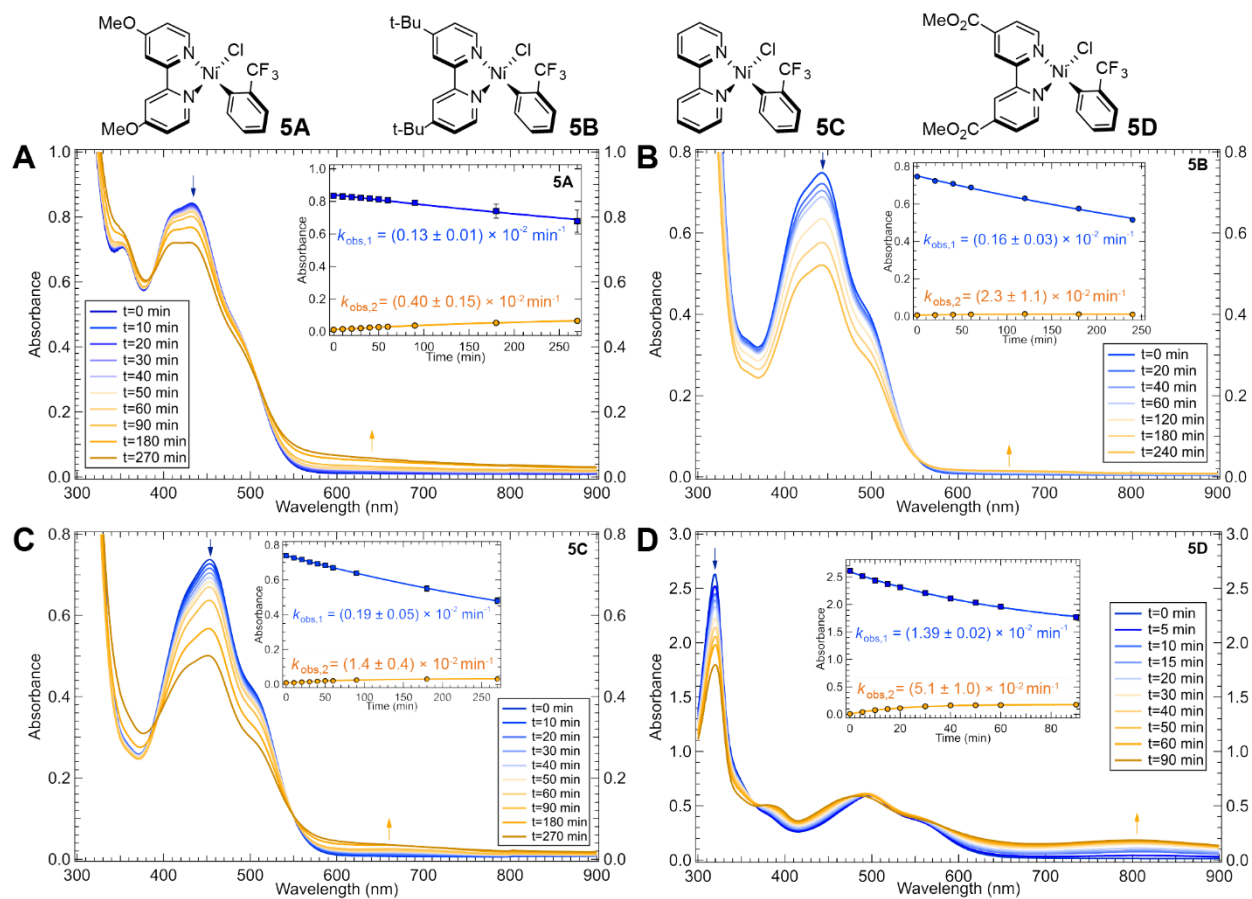

**Figure S19.** Photolysis profiles of **5A–5D** in THF for 390 nm excitation. Photolysis kinetics were monitored at two wavelengths indicated by the blue and orange arrows in each panel. Insets correspond to the fitted kinetic data (blue curve for the decay of the starting material, orange curve for the formation of the new species). Data were fit using a single exponential; error bars are one standard deviation.

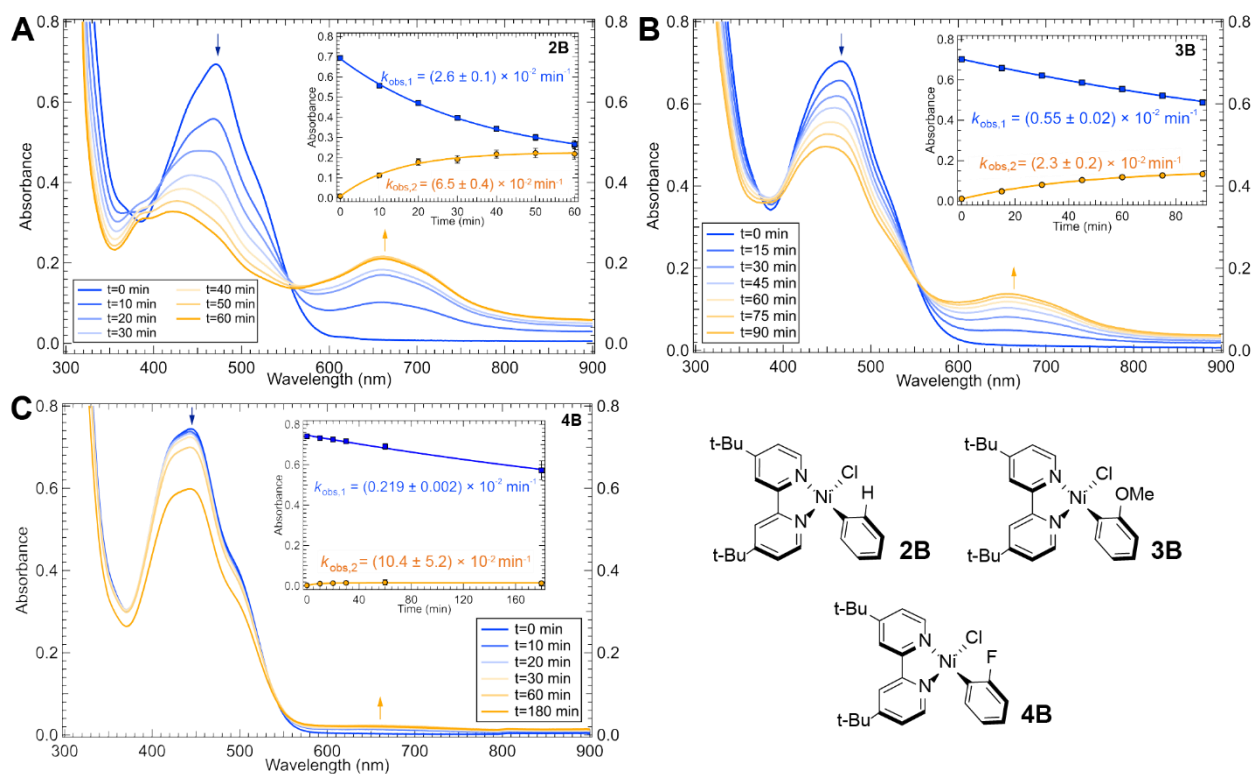

**Figure S20.** Photolysis profiles of **2B–4B** in THF using 390 nm excitation. Photolysis kinetics were monitored at two wavelengths indicated by the blue and orange arrows in each panel. Insets correspond to the fitted kinetic data (blue curve for the decay of the starting material, orange curve for the formation of the new species). Data were fit using a single exponential; error bars are one standard deviation.

### S1.7. Wavelength Dependence Studies.

We undertook wavelength dependence studies on **1B**, **1D**, and **5D**. Samples were prepared following standard protocol: solutions were prepared in the glovebox in THF, distributed into cuvettes with an air-tight seal, then placed 5 cm away from the Kessil PR160L LED light source (incident light  $\lambda_{\text{max}} = 390 \text{ nm}$ ,  $427 \text{ nm}$ ,  $456 \text{ nm}$ , and  $525 \text{ nm}$ ) on maximum intensity. Measured power using a Thorlabs S425C thermal detector power meter at 5 cm distance from the LED are as follows:  $390 \text{ nm}$  (0.49 W),  $427 \text{ nm}$  (0.54 W),  $456$  (0.54 W), and  $525 \text{ nm}$  (0.25 W). The emission spectra of these LEDs are given in Figure S21; sample photochemical setup is given in Figure S1. In all cases, there is a clear wavelength dependence observed on the photolysis step; with lowest energy incident light unable to initiate the Ni–C bond cleavage.

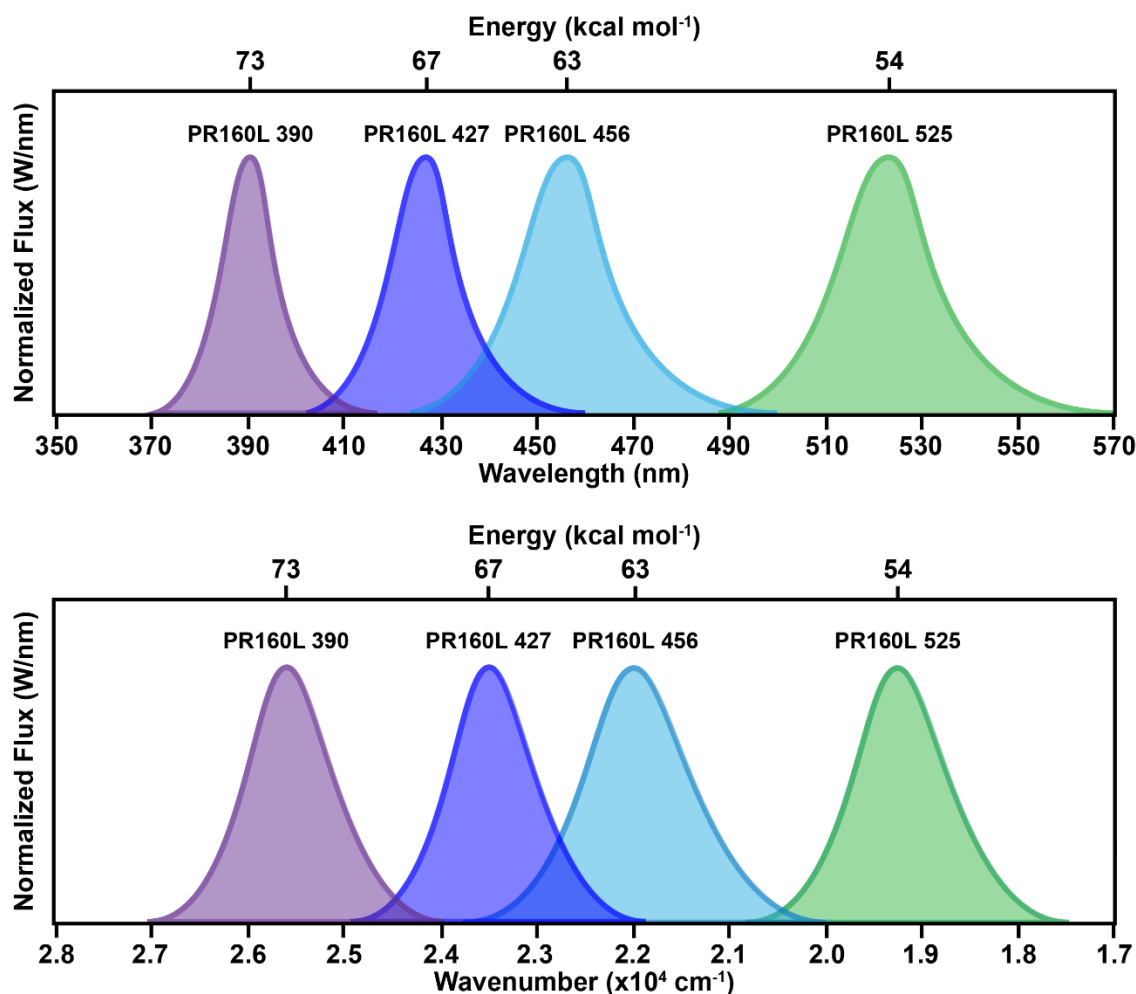

**Figure S21.** Kessil PR160L emission spectra with peak width as given by the manufacturer. Energy markers (kcal mol<sup>-1</sup>) are given at the peak maxima.

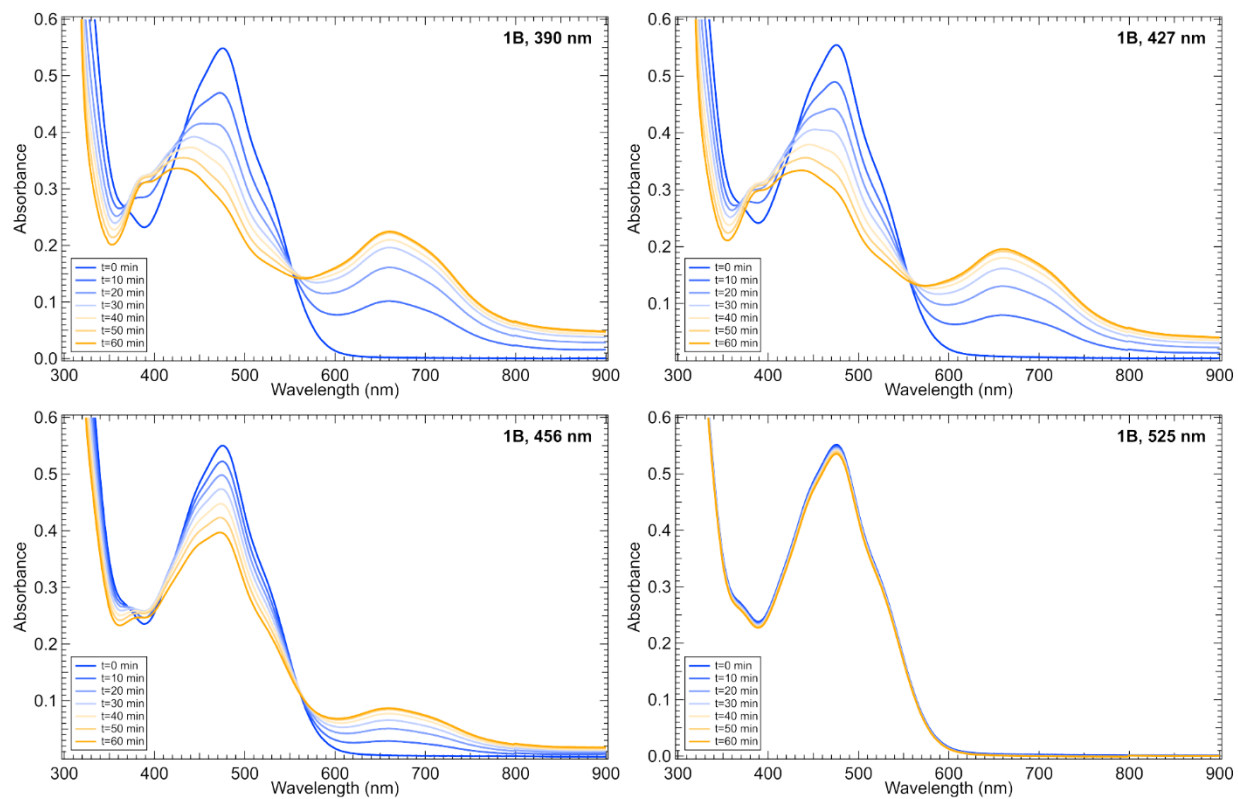

**Figure S22.** Wavelength dependent photolysis of **1B** in THF.

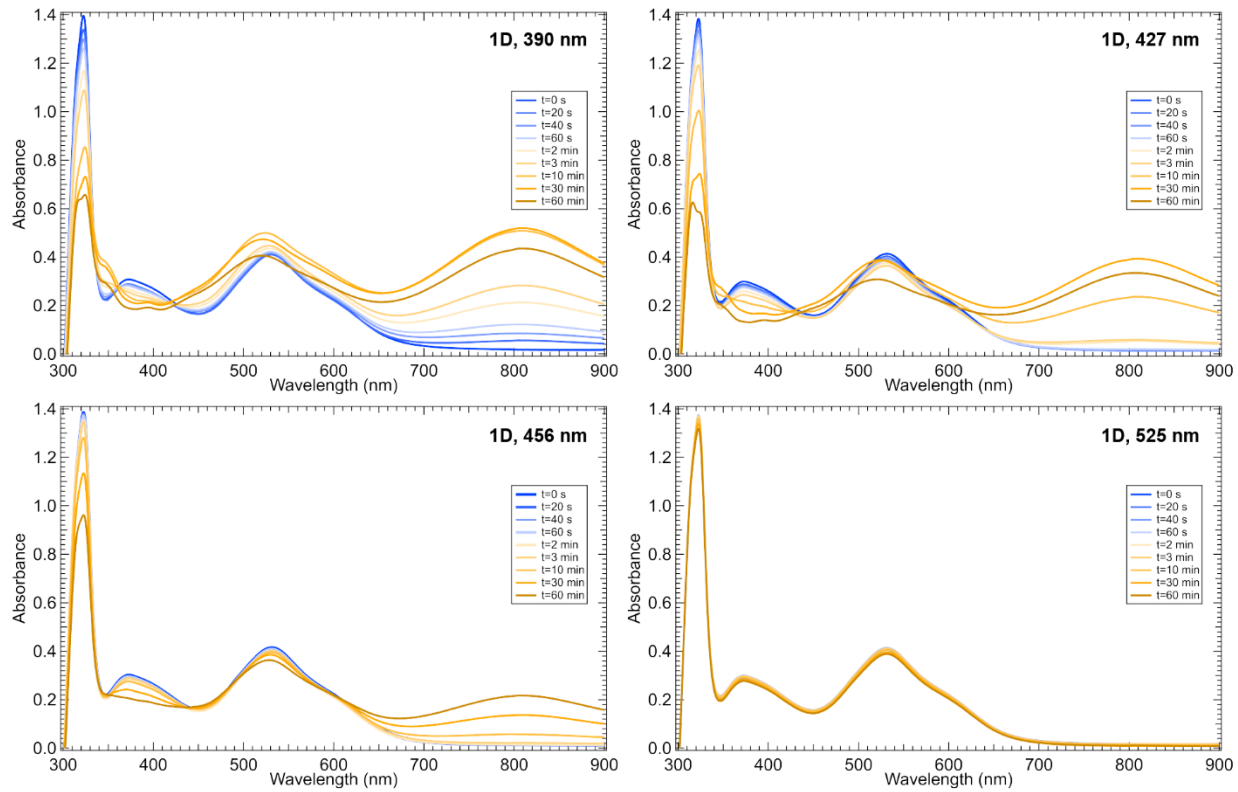

**Figure S23.** Wavelength dependent photolysis of **1D** in THF.

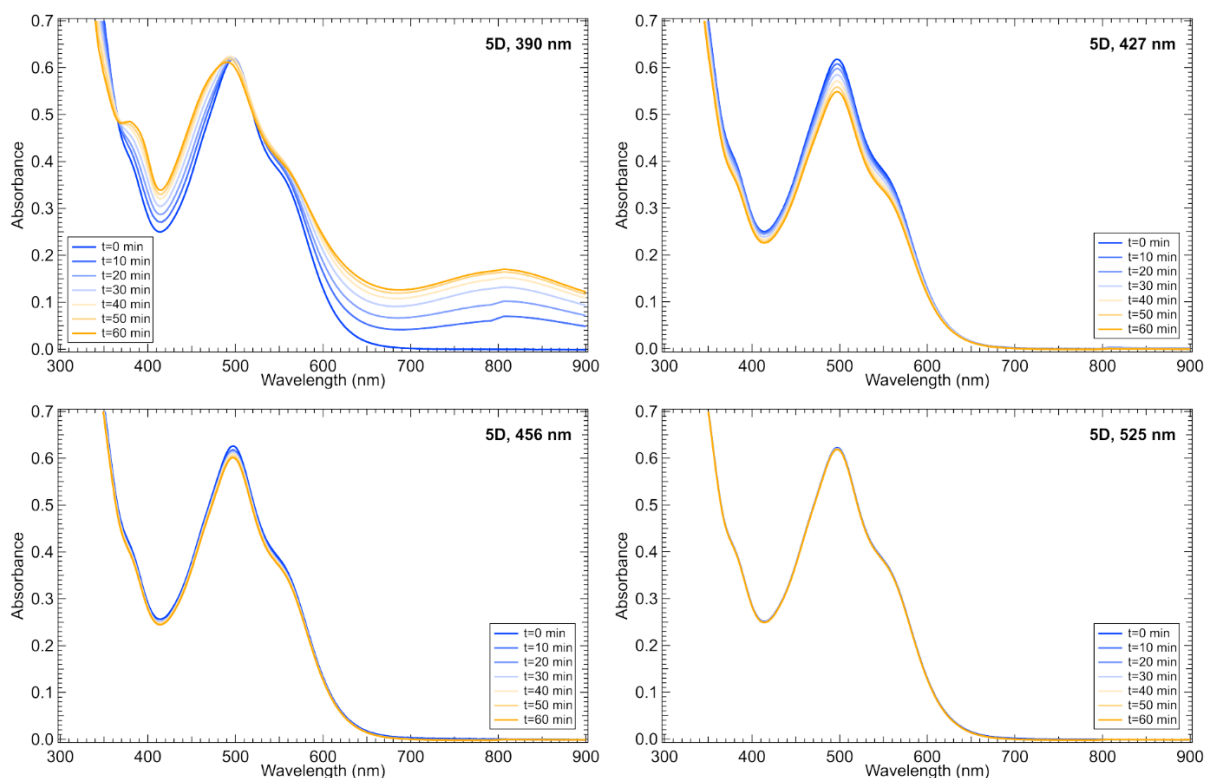

**Figure S24.** Wavelength dependent photolysis of **5D** in THF.

To more fully account for the wavelength-dependent behavior, wavelength-dependent quantum yields can be considered. Quantum yields account for power variance among the four LEDs used and the differential absorbance at each wavelength irradiated. For a more complete description of the quantum yield determination, refer to Supporting Information Section S1.11. Importantly, the wavelength-dependent quantum yields suggest the same conclusion as the kinetic fits (main text Figure 8 and Figure S25).

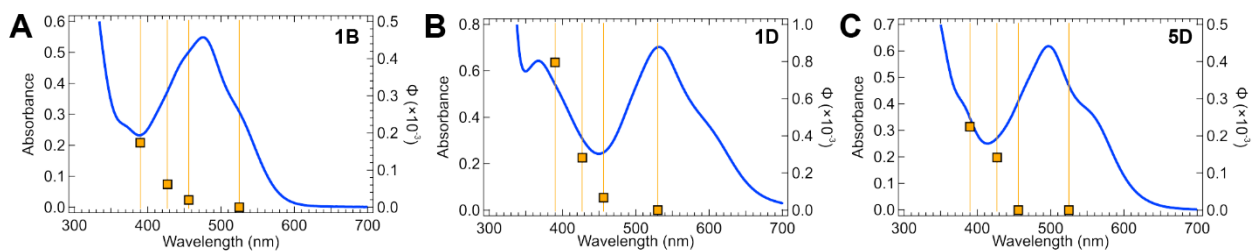

**Figure S25.** Wavelength-dependent photolysis for **1B**, **1D**, and **5D**. The absorption spectra are shown in blue; the observed photolysis quantum yields (squares) and incident wavelengths are given in orange. Quantum yields were calculated at each wavelength using equation S7.

### S1.8. Thermal Dependence Studies – Eyring Analysis.

Temperature dependent photolyses allowed for the experimental determination of the barrier for light-induced Ni–C bond homolysis. The rate of the initial excitation step (MLCT) is negligible given the time scales of these experiments, so the bond-breaking step is rate determining. A plot of  $\ln(k_{1,obs})/T$  versus  $1/T$  gives a line. We examined the well-characterized complexes, **1B** and **1B–Br**. Samples were prepared as is typical for our photolysis experiments. Cuvettes were suspended in a large water bath kept at specific temperatures. Samples were allowed to equilibrate with the water bath before irradiation was begun. Example setup is given in Figure S1.

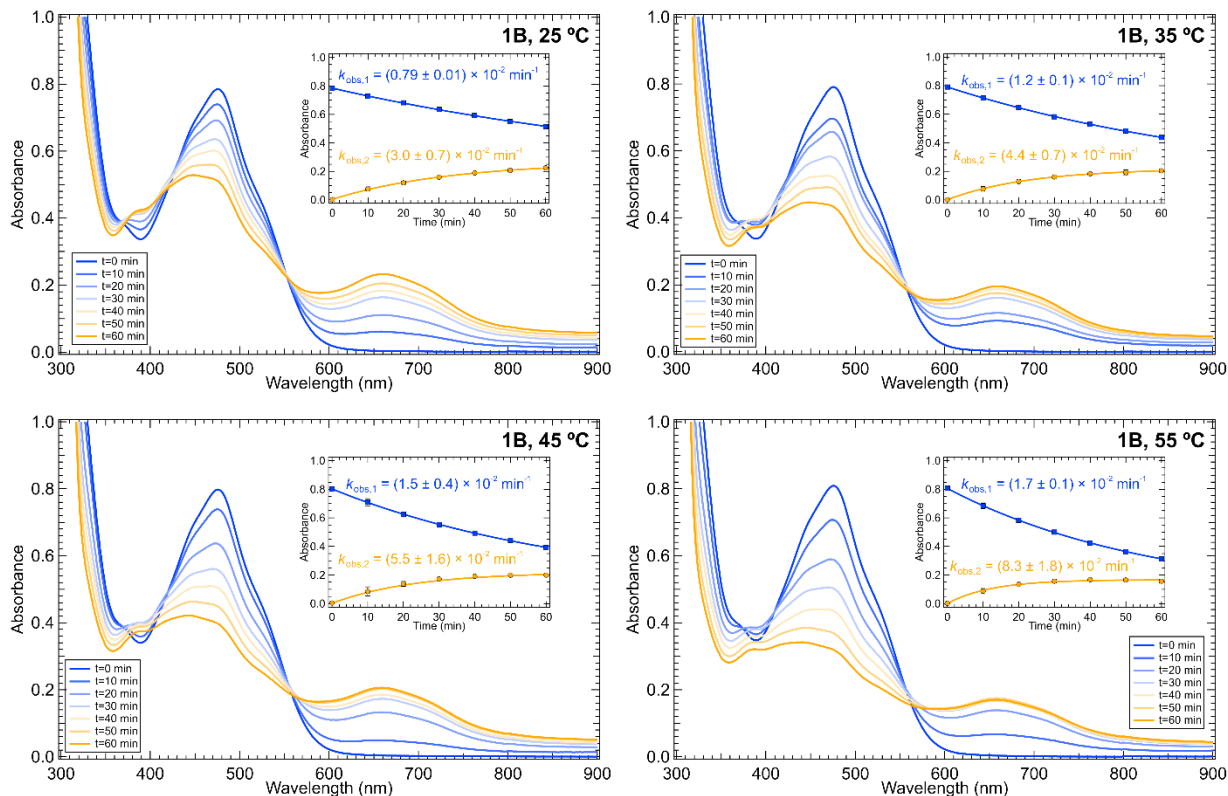

**Figure S26.** Thermal dependence on photolysis rate for **1B** in THF monitored at the  $\lambda_{\max}$  of the starting compound, 475 nm, and the new peak, 660 nm.



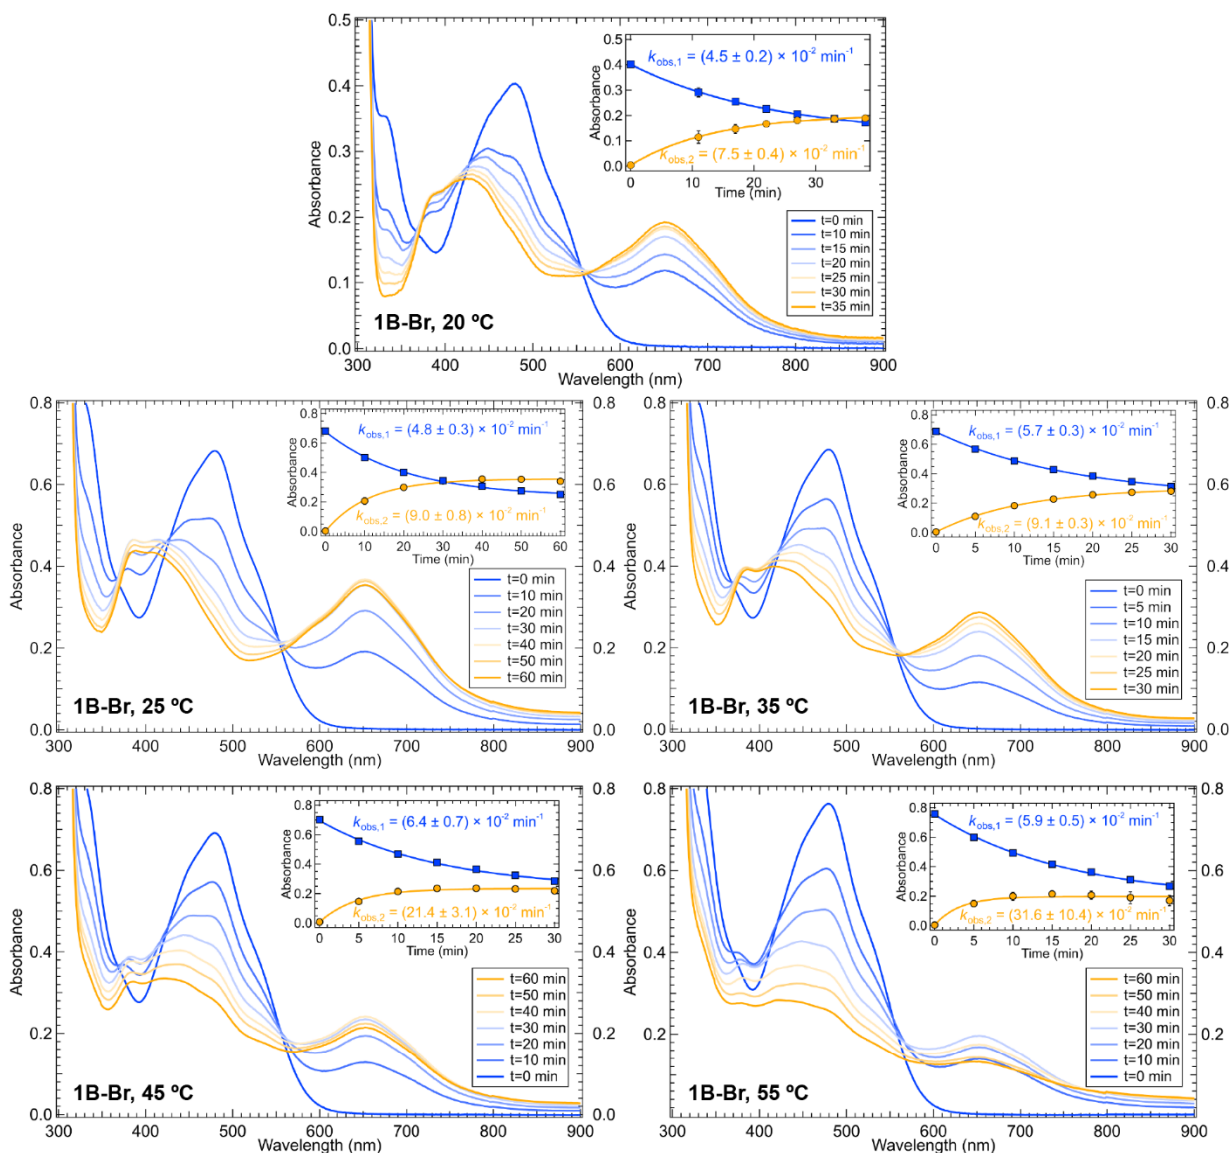

**Figure S27.** Thermal dependence on photolysis rate for **1B-Br** in THF monitored at the  $\lambda_{\text{max}}$  of the starting compound, 479 nm, and the new peak, 653 nm. Note that the thermal decomposition contributions are much more pronounced at 55 °C, causing a lack of linearity in the final Eyring analysis.

We observed linear behavior for **1B** at all temperatures studied, but a loss of linearity for **1B-Br** at the highest temperature utilized. This change in behavior is likely due to thermal degradation of the sample and was omitted from the final Eyring analysis (note that loss of linearity at high temperatures has also been seen by Bird et. al for the same complex).<sup>9</sup> Interestingly, a thermal dependence on the decomposition of the product species was also observed. Current work is underway to further investigate this new species, including the decay rate, barrier of formation, reactivity, and further characterization of the resulting compound.

### S1.9. Global Analysis Modeling of Kinetics.

The single wavelength exponential fits used in the main text may contain spectral overlap of the starting material and the photolysis product. Additionally, they cannot explain the systematic difference between  $k_{1,obs}$  and  $k_{2,obs}$ . To account for these additional complexities, time-resolved photolysis absorbance data were fit to global kinetic models using in-house Matlab scripts patterned after established programs.<sup>10,11</sup> Global kinetics modeling enables calculation of a unique molar absorptivity curve for each absorbing species in the reaction, thereby addressing potential spectral overlap. Global kinetics also calculates rate constants for elementary reaction steps ( $k_p$  and  $k_d$  in Scheme S2), whereas  $k_{2,obs}$  depends on multiple elementary reaction steps (*vide infra*). The global kinetics modeling supports all the conclusions of the single-wavelength fits, but displays moderately increased uncertainty due to the larger number of parameters to be fit. Therefore, we elected to employ  $k_{1,obs}$  in the main text.

Initial screening of the data by singular value decomposition (SVD) suggests that at least two absorbing species are required in a general kinetic model, in agreement with the two isosbestic points visible in many of the datasets. Both two- and three-absorber kinetic models were tested, but the molar absorptivity curves of the third component tended to duplicate the profiles from the first two species. We therefore employed two absorbing species in our kinetic models. Spectral non-negativity was enforced by truncation, and all rate constant fits were started from multiple initial guesses to ensure robust convergence of the nonlinear optimizer. Numerical integration was performed with the *ode15s* stiff solver to eliminate numerical noise. Initial concentration conditions were obtained using the experimental molar absorptivity coefficients from S1.5.

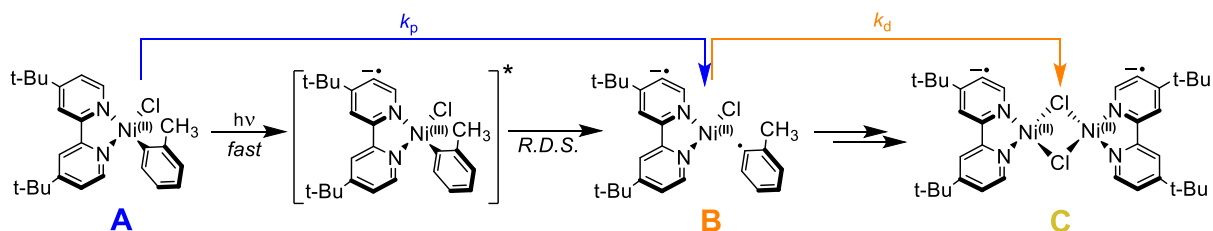

**Scheme S2.** Reaction pathway modeled using global analysis showing the photolysis of **1B** as an example. We use  $k_p$  for the photolysis step and  $k_d$  for the decay step in this model. The decomposition product, **C**, is shown as the formal Ni(I)bpy halide-bridged dimer,<sup>12</sup> but its exact identity has not yet been confirmed; investigations are ongoing.

Though two absorbing species can account for the observed data, a simple  $[A \rightarrow B]$  model provides a poor fit to the kinetics. This is manifest in the disparate values of  $k_{1,obs}$  and  $k_{2,obs}$  obtained by exponential fitting to single wavelength traces (Table 1, main text Figure 4, Figure S19-S20). We therefore tested a variety of kinetic models involving a third species, (**C**), which does not absorb in the visible region, forming from either the starting material or the photolysis product. The absorptivity of **C** was constrained to be zero over the wavelength range investigated (300-900 nm). Table S2 quantifies the goodness of fit of each model via the root-mean-square of the residual absorbance matrix (RMSR). As the RMSR values for the  $[A \rightarrow B, B \rightarrow C]$  and  $[A \rightarrow B, 2B \rightarrow C]$  models are very similar in all cases, these two models are analyzed as a pair; similarly for the models  $[A \rightarrow C, C \rightarrow B]$  and  $[A \rightarrow C, 2C \rightarrow B]$ .

**Table S2.** Root-mean-square of the residuals (RMSR) for seven kinetic models (Abs). *A* represents the starting material, *B* represents an absorbing product, and *C* represent a non-absorbing product. The best pair of overall models is surrounded by a dark black border; the best pair of models for each particular dataset highlighted in green.

| <b>Dataset</b> | $A \rightarrow B$     | $2A \rightarrow B$    | $A \rightarrow B$<br>$A \rightarrow C$ | $A \rightarrow B$<br>$B \rightarrow C$ | $A \rightarrow B$<br>$2B \rightarrow C$ | $A \rightarrow C$<br>$C \rightarrow B$ | $A \rightarrow C$<br>$2C \rightarrow B$ |
|----------------|-----------------------|-----------------------|----------------------------------------|----------------------------------------|-----------------------------------------|----------------------------------------|-----------------------------------------|
| <b>1A</b>      | $1.75 \times 10^{-2}$ | $1.78 \times 10^{-2}$ | $1.75 \times 10^{-2}$                  | $1.42 \times 10^{-2}$                  | $1.35 \times 10^{-2}$                   | $1.75 \times 10^{-2}$                  | $1.77 \times 10^{-2}$                   |
| <b>1B</b>      | $9.24 \times 10^{-3}$ | $9.15 \times 10^{-3}$ | $9.24 \times 10^{-3}$                  | $2.40 \times 10^{-3}$                  | $2.39 \times 10^{-3}$                   | $9.20 \times 10^{-3}$                  | $8.31 \times 10^{-3}$                   |
| <b>1C</b>      | $6.61 \times 10^{-3}$ | $7.13 \times 10^{-3}$ | $6.61 \times 10^{-3}$                  | $6.61 \times 10^{-3}$                  | $6.61 \times 10^{-3}$                   | $3.56 \times 10^{-3}$                  | $3.37 \times 10^{-3}$                   |
| <b>1D</b>      | $8.91 \times 10^{-3}$ | $1.18 \times 10^{-2}$ | $8.91 \times 10^{-3}$                  | $8.81 \times 10^{-3}$                  | $8.17 \times 10^{-3}$                   | $7.76 \times 10^{-3}$                  | $8.17 \times 10^{-3}$                   |
| <b>2B</b>      | $9.93 \times 10^{-3}$ | $9.79 \times 10^{-3}$ | $9.93 \times 10^{-3}$                  | $3.71 \times 10^{-3}$                  | $3.84 \times 10^{-3}$                   | $9.85 \times 10^{-3}$                  | $9.97 \times 10^{-3}$                   |
| <b>3B</b>      | $4.79 \times 10^{-3}$ | $4.78 \times 10^{-3}$ | $4.79 \times 10^{-3}$                  | $1.50 \times 10^{-3}$                  | $1.40 \times 10^{-3}$                   | $4.79 \times 10^{-3}$                  | $4.65 \times 10^{-3}$                   |
| <b>4B</b>      | $3.20 \times 10^{-3}$ | $3.58 \times 10^{-3}$ | $3.20 \times 10^{-3}$                  | $2.02 \times 10^{-3}$                  | $1.96 \times 10^{-3}$                   | $3.20 \times 10^{-3}$                  | $3.25 \times 10^{-3}$                   |
| <b>5A</b>      | $2.55 \times 10^{-3}$ | $2.75 \times 10^{-3}$ | $2.55 \times 10^{-3}$                  | $2.54 \times 10^{-3}$                  | $2.54 \times 10^{-3}$                   | $2.55 \times 10^{-3}$                  | $2.54 \times 10^{-3}$                   |
| <b>5C</b>      | $7.58 \times 10^{-3}$ | $7.78 \times 10^{-3}$ | $7.58 \times 10^{-3}$                  | $7.58 \times 10^{-3}$                  | $7.58 \times 10^{-3}$                   | $3.41 \times 10^{-3}$                  | $3.43 \times 10^{-3}$                   |
| <b>5D</b>      | $8.10 \times 10^{-3}$ | $8.49 \times 10^{-3}$ | $8.10 \times 10^{-3}$                  | $5.25 \times 10^{-3}$                  | $5.21 \times 10^{-3}$                   | $8.12 \times 10^{-3}$                  | $8.09 \times 10^{-3}$                   |
| <b>1B-Br</b>   | $4.46 \times 10^{-3}$ | $4.61 \times 10^{-3}$ | $4.46 \times 10^{-3}$                  | $2.72 \times 10^{-3}$                  | $2.65 \times 10^{-3}$                   | $4.36 \times 10^{-3}$                  | $4.11 \times 10^{-3}$                   |

Table S2 shows evidence that the non-absorbing third species (*C*) forms in sequence after the monomeric photolysis product. When the non-absorbing species is included along either a branching pathway (e.g.  $[A \rightarrow B, A \rightarrow C]$ ) or included prior to the formation of monomer, *B* (e.g.  $[A \rightarrow C, C \rightarrow B]$ ), the RMSR is worsened in most cases. Datasets **1C**, **1D**, and **5C** provide exceptions to the general trend, in which the  $[A \rightarrow C, C \rightarrow B]$  model provides an improved mathematical fit. The nearly equivalent RMSR values for the  $[A \rightarrow B, B \rightarrow C]$  and  $[A \rightarrow B, 2B \rightarrow C]$  reaction models preclude conclusive identification of the chemical identity of *C*. Although we speculate that *C* is the non-absorbing halide bridged dimeric species<sup>12</sup> shown in Scheme S2, this study is agnostic as to the identity of the decomposition product *C*. Therefore, we elected to continue with the simplest possible kinetic model, namely the first-order decay  $[A \rightarrow B, B \rightarrow C]$ . Further studies to identify monomer decomposition products, dimer or otherwise, are ongoing.

Owing to the sequential mechanism,  $[A \rightarrow B, B \rightarrow C]$ , the consumption of *A* can be described as a pure monoexponential decay, but the formation of the monomer product *B* is actually described by a sum of two exponentials expressing competing formation and decomposition processes.<sup>13</sup> That is, as a result of the competing supply and removal, *B* approaches steady state at a condition determined by the ratio of the elementary rate constants for photolysis,  $k_p [A \rightarrow B]$  and decomposition,  $k_d [B \rightarrow C]$ . The decomposition process truncates the rise of the monomer species and gives its concentration profile a sharper bend than would otherwise be obtained. The concentration of the monomer will begin to decrease if the reaction is run for a

sufficient amount of time. These effects can be seen in the modeled concentration profiles below in Figures S28–S39 (refer to the bottom left panels).

In the main text,  $k_{obs,1}$  and  $k_{obs,2}$  are monoexponential fits to the characteristic starting material and monomer absorbance features, respectively. If decomposition of the monomeric species is negligible,  $k_{obs,1}$  and  $k_{obs,2}$  should be nearly equal, and additionally the isosbestic points will show high fidelity. This is the case for the compound **1C**, for example (main text Figure 4C), which has  $k_{obs,1} = 3.6 \pm 0.6$ , and  $k_{obs,2} = 2.9 \pm 0.3$ , and comparatively clean isosbestic points. However, if the photoproduct’s decomposition is significant, then the fitted value  $k_{obs,2}$  will be elevated due to the increased curvature of the monomer’s concentration profile. For example, compound **1B** (main text Figure 4B) exhibits this feature, and has  $k_{obs,1} = 2.5 \pm 0.2$ , and  $k_{obs,2} = 7.6 \pm 0.7$ , and a 400 nm isosbestic point showing substantial drift. Since the  $k_{obs,2}$  constitutes a monoexponential fit to a concentration profile that is not a true mono-exponential process, it is additionally likely that the  $k_{obs,2}$  fits will display a higher variance than when fitting a monoexponential function to a true mono-exponential concentration profile ( $k_{obs,1}$ ).

This analysis indicates that  $k_{obs,1}$  represents the truer rate of the bond homolysis process, while  $k_{obs,2}$  is a convolution of the elementary rate constants  $k_p$  (photolysis) and  $k_d$  (decomposition) included in our global fitting kinetic model. We have therefore used  $k_{obs,1}$  in our correlations of rate constants and electronic effects. We further note that  $k_p$  gives the same qualitative trends as  $k_{1,obs}$  (Figure S40). Table S3 gives the optimized rate constants for the  $[A \rightarrow B, B \rightarrow C]$  reaction model.

**Table S3.** Optimized rate constants for the  $[A \rightarrow B, B \rightarrow C]$  reaction model compared to experimental data with first-order fits.

| Dataset      | $k_{obs,1}$<br>( $\times 10^{-2} \text{ min}^{-1}$ ) | $k_p [A \rightarrow B]$<br>( $\times 10^{-2} \text{ min}^{-1}$ ) | $k_d [B \rightarrow C]$<br>( $\times 10^{-2} \text{ min}^{-1}$ ) |
|--------------|------------------------------------------------------|------------------------------------------------------------------|------------------------------------------------------------------|
| <b>1A</b>    | <i>n.d.</i> <sup>a</sup>                             | $0.9 \pm 0.1$                                                    | $0.84 \pm 0.2$                                                   |
| <b>1B</b>    | $2.5 \pm 0.2$                                        | $4.1 \pm 0.4$                                                    | $0.70 \pm 0.03$                                                  |
| <b>1C</b>    | $3.6 \pm 0.6$                                        | $3.3 \pm 0.5$                                                    | 0                                                                |
| <b>1D</b>    | $17.0 \pm 0.7$                                       | $15.0 \pm 0.8$                                                   | $0.27 \pm 0.06$                                                  |
| <b>2B</b>    | $2.6 \pm 0.1$                                        | $4.4 \pm 0.1$                                                    | $0.64 \pm 0.1$                                                   |
| <b>3B</b>    | $0.55 \pm 0.02$                                      | $1.6 \pm 0.1$                                                    | $0.32 \pm 0.05$                                                  |
| <b>4B</b>    | $0.219 \pm 0.002$                                    | $0.14 \pm 0.18$                                                  | $4.9 \pm 2.5$                                                    |
| <b>5A</b>    | $0.13 \pm 0.01$                                      | $0.08 \pm 0.03$                                                  | $0.003 \pm 0.04$                                                 |
| <b>5B</b>    | $0.16 \pm 0.03$                                      | <i>n.d.</i> <sup>b</sup>                                         | <i>n.d.</i> <sup>b</sup>                                         |
| <b>5C</b>    | $0.19 \pm 0.05$                                      | $0.16 \pm 0.01$                                                  | 0                                                                |
| <b>5D</b>    | $1.39 \pm 0.02$                                      | $3.0 \pm 0.5$                                                    | $0.22 \pm 0.05$                                                  |
| <b>1B–Br</b> | $6.9 \pm 0.4$                                        | $8.1 \pm 0.8$                                                    | $0.26 \pm 0.09$                                                  |

<sup>a</sup>Because the new species formed upon Ni(II)–C bond homolysis has absorption underneath that of the starting material, we were unable to obtain  $k_{1,obs}$  for this compound. <sup>b</sup>Complex **5B** was omitted owing to poor convergence of the global kinetics model.

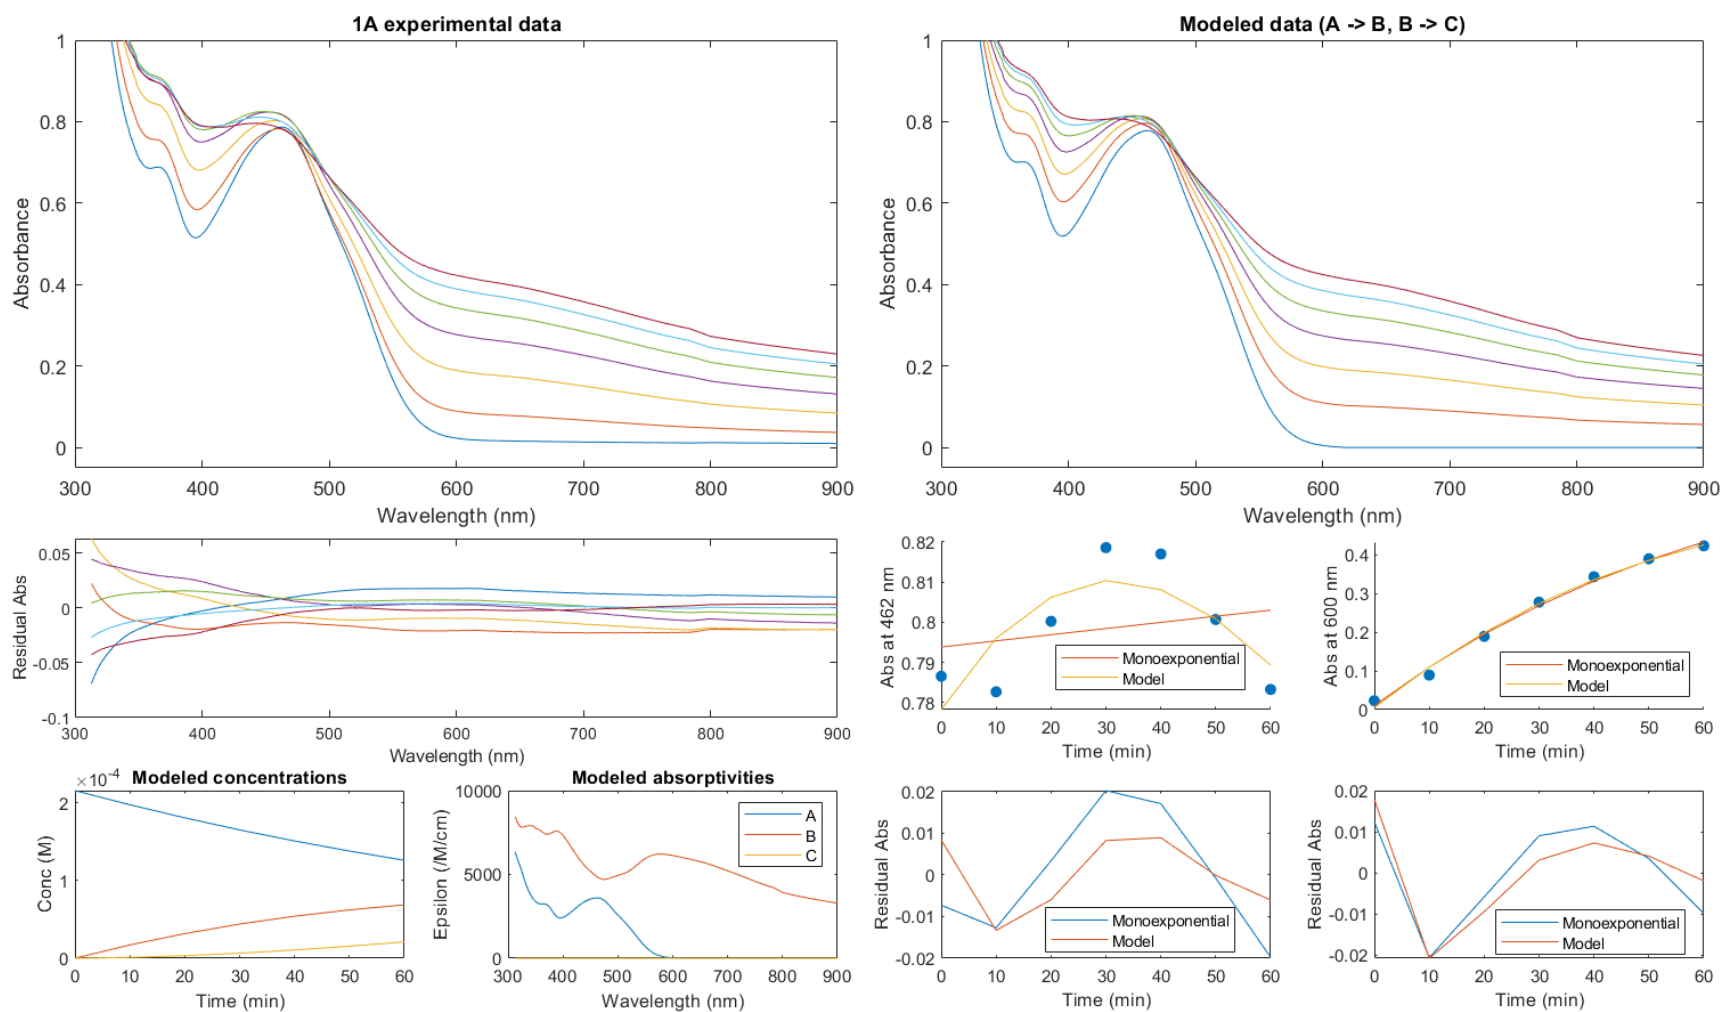

**Figure S28.** Kinetic modeling fit to **1A**. Top left: raw experimental absorbance data. Top right: absorbance data reproduced by the  $[A \rightarrow B, B \rightarrow C]$  kinetic model. Center left: model residuals as a function of wavelength. Bottom left: concentration profiles and molar absorptivity curves reconstructed by the kinetic model. Center right: single-wavelength absorbance traces at 462 nm and 600 nm as a function of time, with monoexponential ( $k_{1,obs}$ ,  $k_{2,obs}$ ) and kinetic model ( $k_p$ ,  $k_d$ ) fits superimposed. Bottom right: single-wavelength residuals as a function of time.

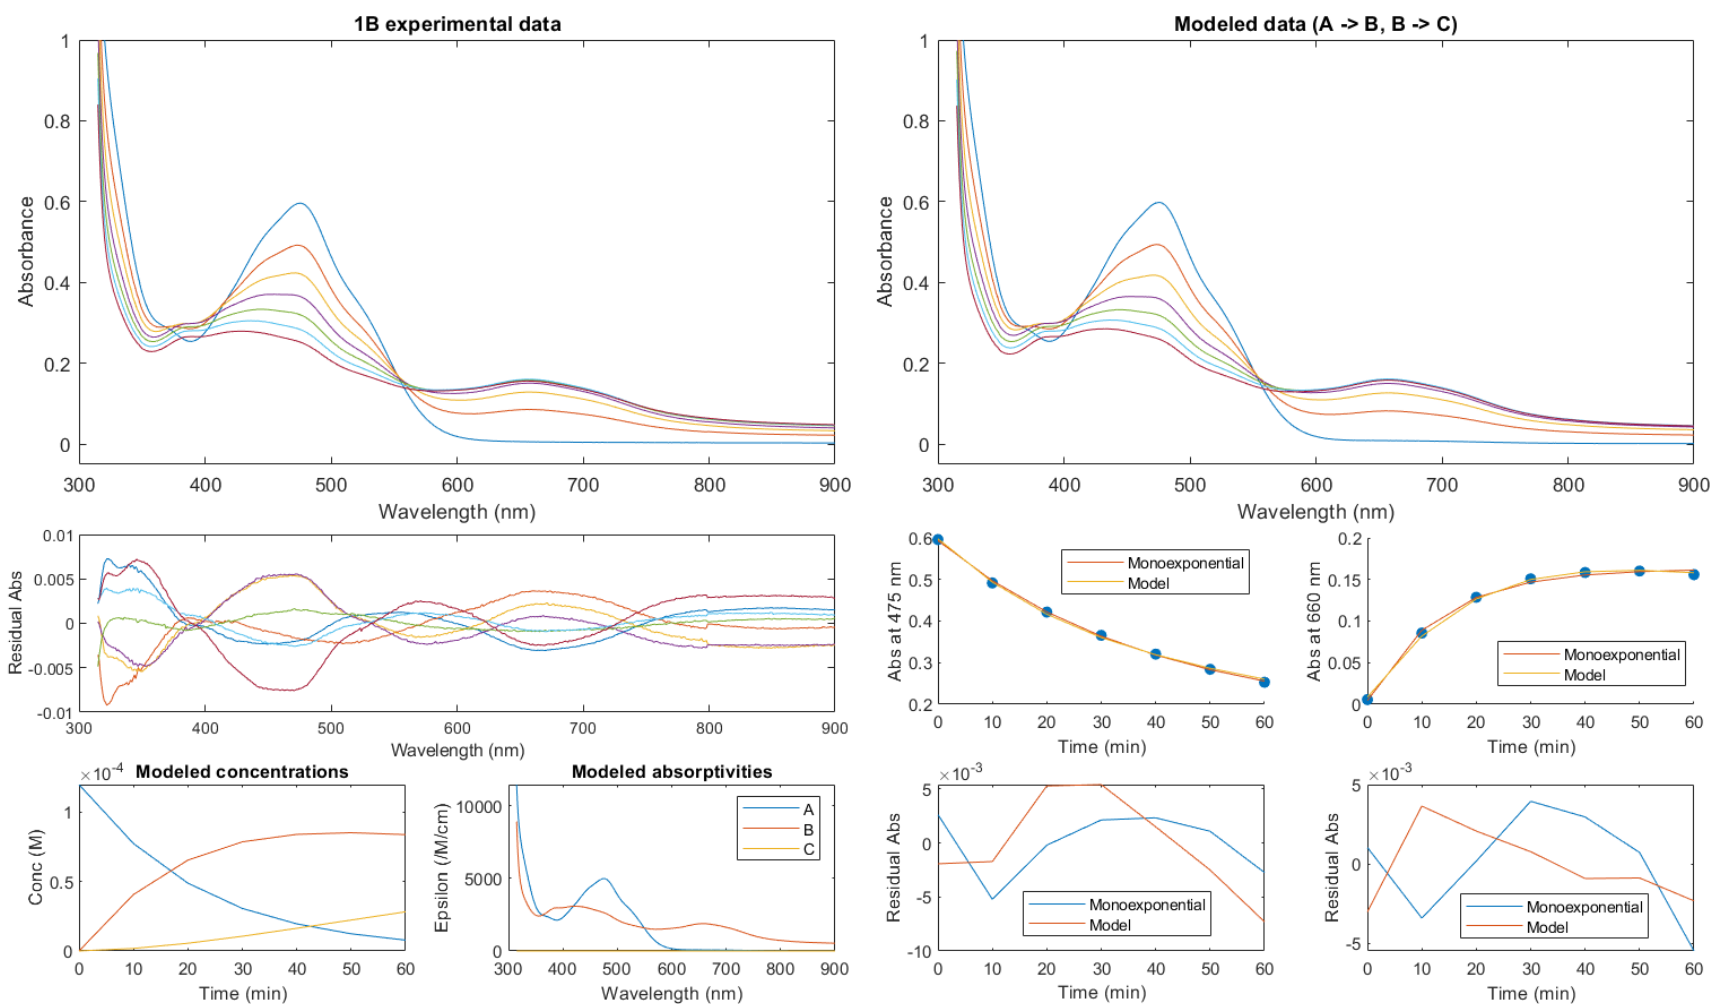

**Figure S29.** Kinetic modeling fit to **1B**. Top left: raw experimental absorbance data. Top right: absorbance data reproduced by the  $[A \rightarrow B, B \rightarrow C]$  kinetic model. Center left: model residuals as a function of wavelength. Bottom left: concentration profiles and molar absorptivity curves reconstructed by the kinetic model. Center right: single-wavelength absorbance traces at 475 nm and 660 nm as a function of time, with monoexponential ( $k_{1,obs}$ ,  $k_{2,obs}$ ) and kinetic model ( $k_p$ ,  $k_d$ ) fits superimposed. Bottom right: single-wavelength residuals as a function of time.

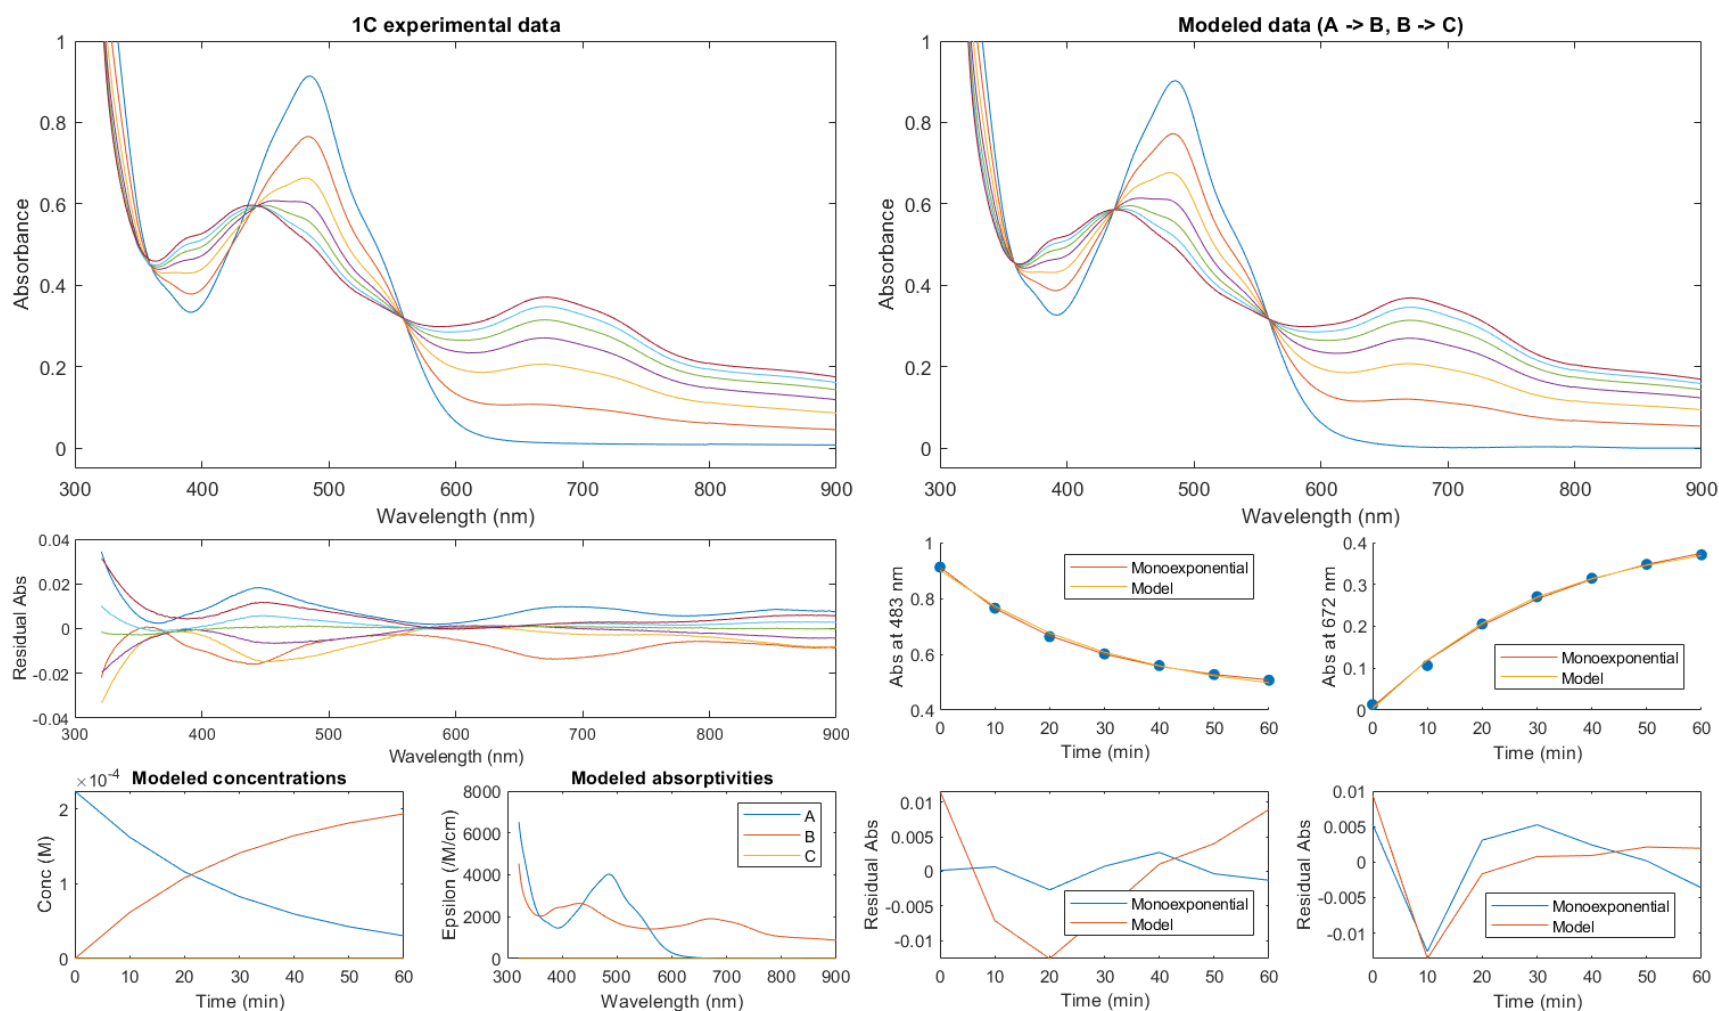

**Figure S30.** Kinetic modeling fit to **1C**. Top left: raw experimental absorbance data. Top right: absorbance data reproduced by the  $[A \rightarrow B, B \rightarrow C]$  kinetic model. Center left: model residuals as a function of wavelength. Bottom left: concentration profiles and molar absorptivity curves reconstructed by the kinetic model. Center right: single-wavelength absorbance traces at 483 nm and 672 nm as a function of time, with monoexponential ( $k_{1,obs}$ ,  $k_{2,obs}$ ) and kinetic model ( $k_p$ ,  $k_d$ ) fits superimposed. Bottom right: single-wavelength residuals as a function of time.

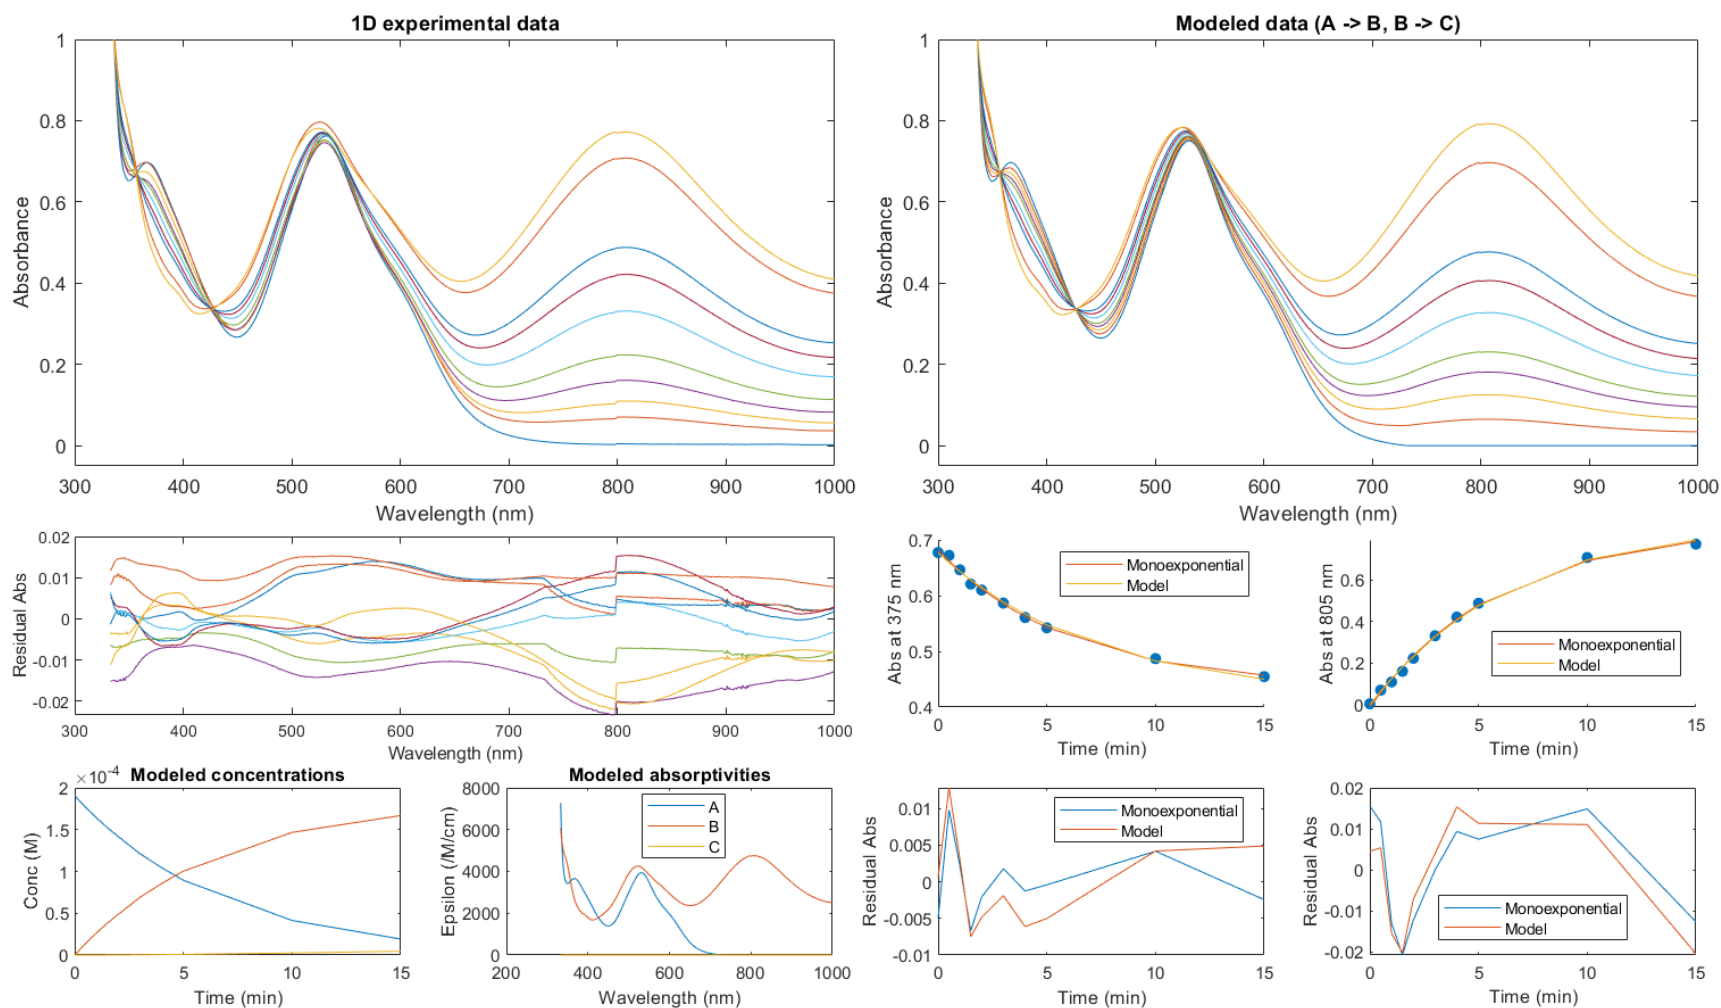

**Figure S31.** Kinetic modeling fit to **1D**. Top left: raw experimental absorbance data. Top right: absorbance data reproduced by the  $[A \rightarrow B, B \rightarrow C]$  kinetic model. Center left: model residuals as a function of wavelength. Bottom left: concentration profiles and molar absorptivity curves reconstructed by the kinetic model. Center right: single-wavelength absorbance traces at 375 nm and 805 nm as a function of time, with monoexponential ( $k_{1,obs}$ ,  $k_{2,obs}$ ) and kinetic model ( $k_p$ ,  $k_d$ ) fits superimposed. Bottom right: single-wavelength residuals as a function of time.



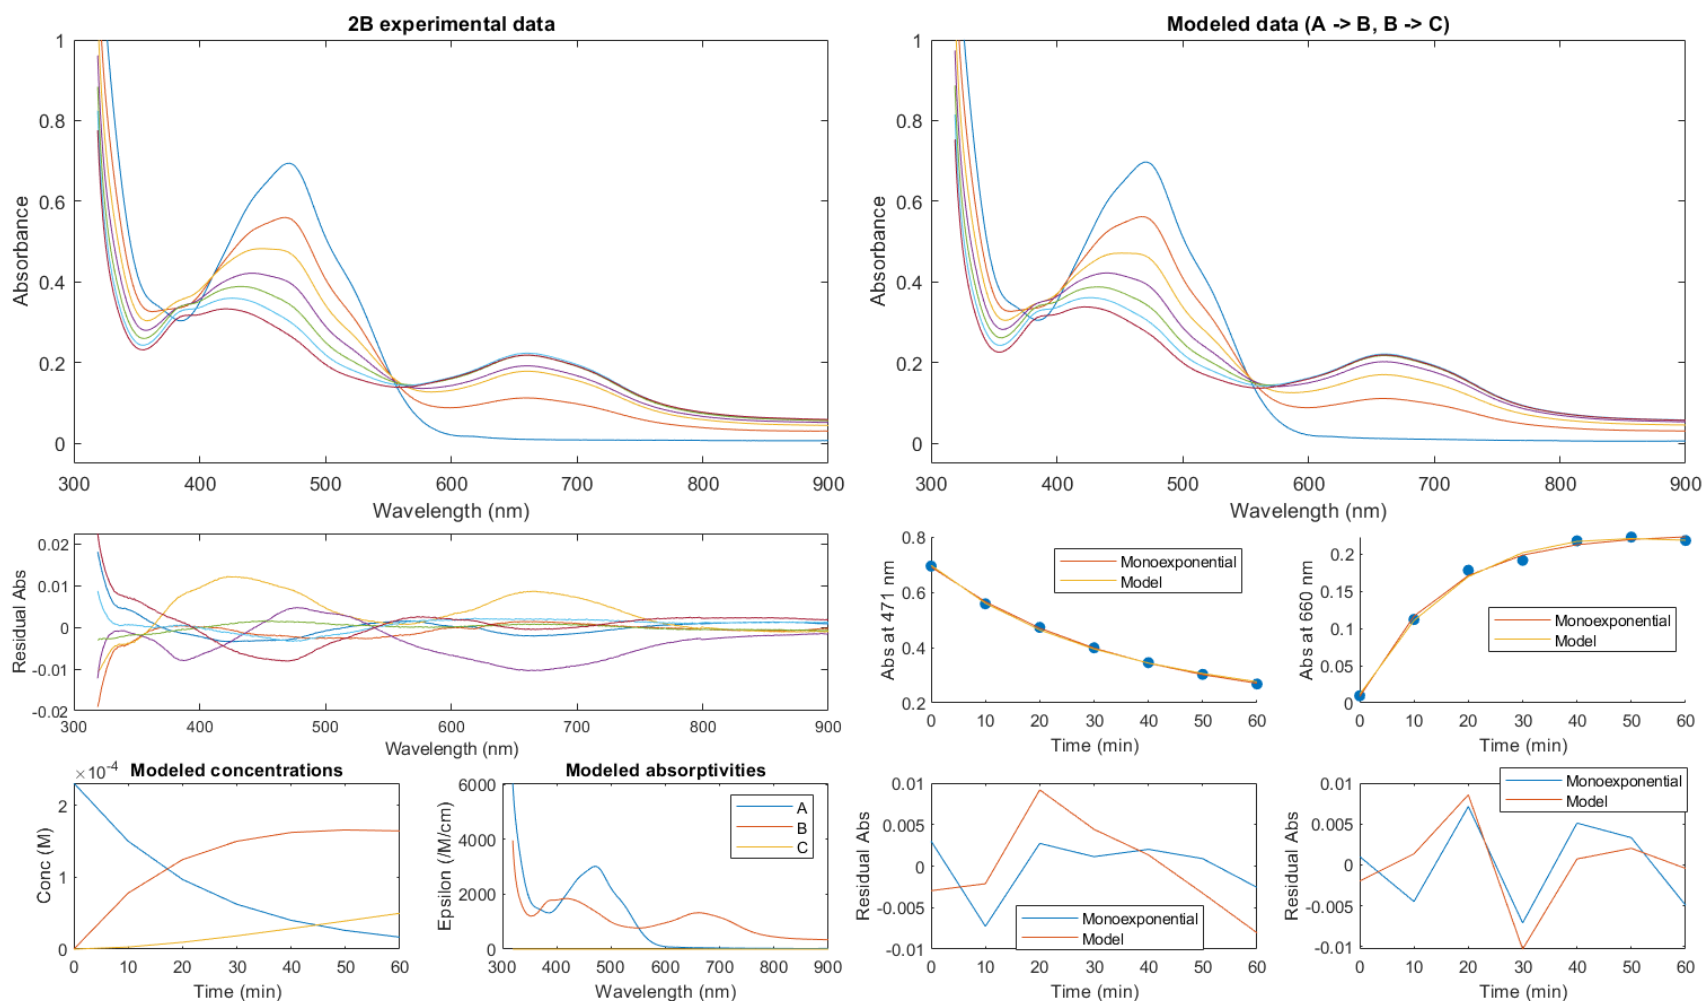

**Figure S32.** Kinetic modeling fit to **2B**. Top left: raw experimental absorbance data. Top right: absorbance data reproduced by the  $[A \rightarrow B, B \rightarrow C]$  kinetic model. Center left: model residuals as a function of wavelength. Bottom left: concentration profiles and molar absorptivity curves reconstructed by the kinetic model. Center right: single-wavelength absorbance traces at 471 nm and 660 nm as a function of time, with monoexponential ( $k_{1,obs}$ ,  $k_{2,obs}$ ) and kinetic model ( $k_p$ ,  $k_d$ ) fits superimposed. Bottom right: single-wavelength residuals as a function of time.

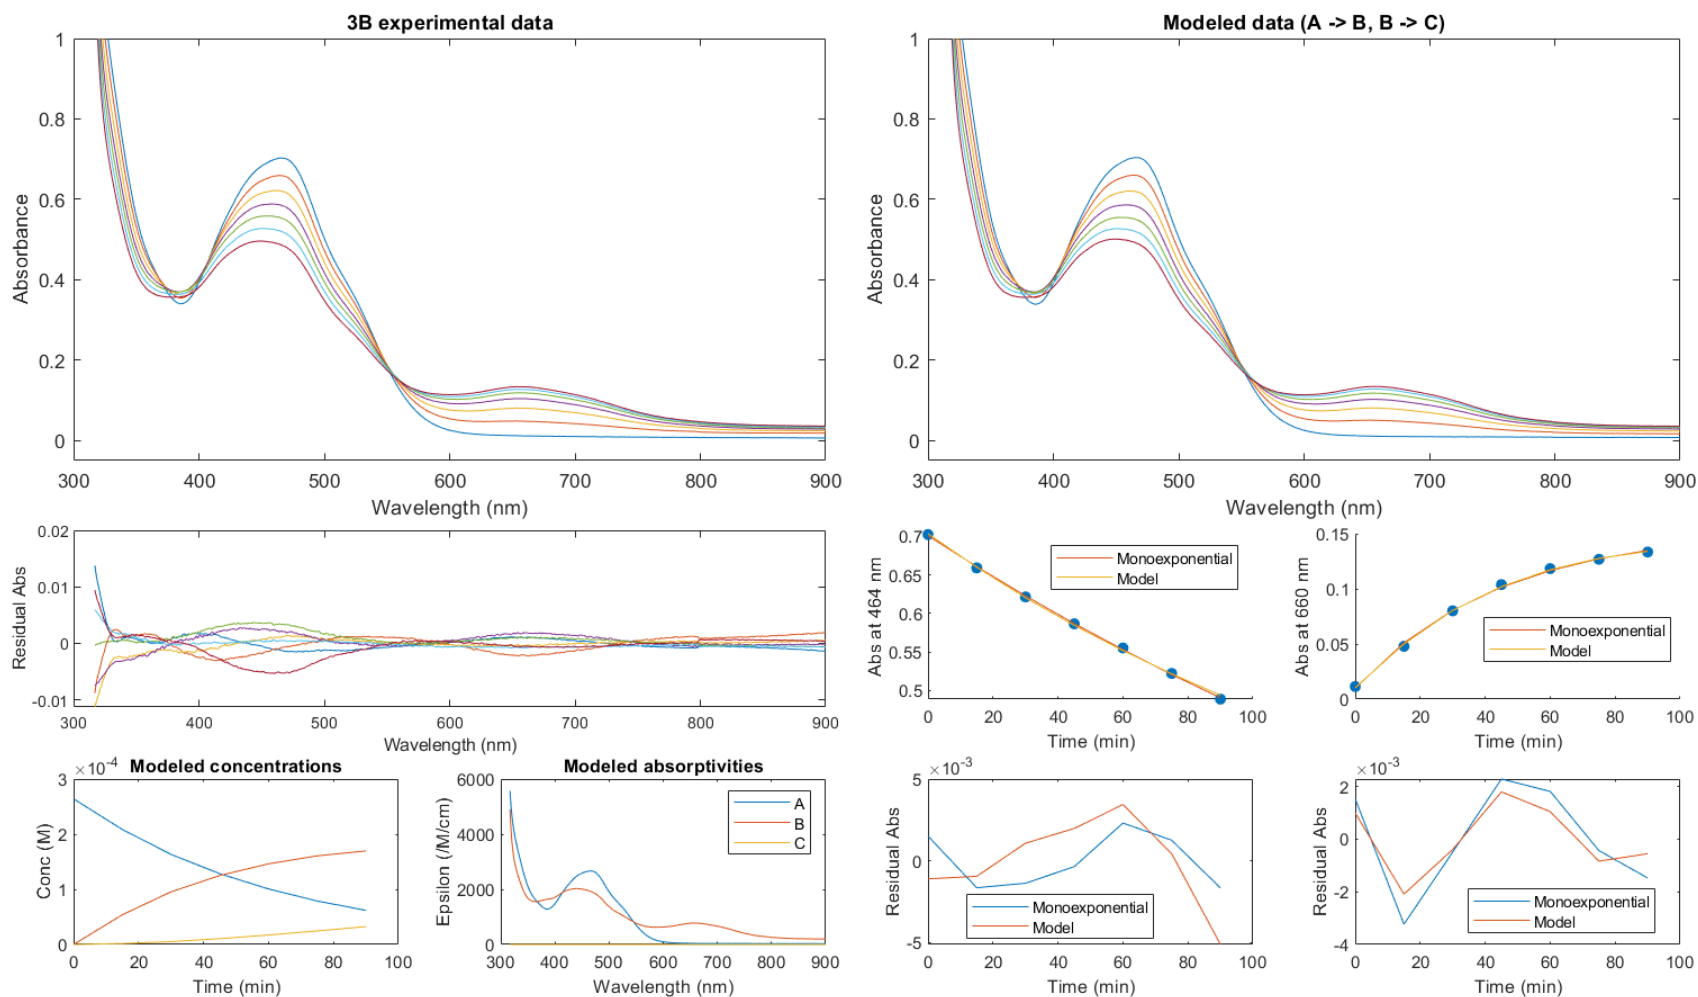

**Figure S33.** Kinetic modeling fit to **3B**. Top left: raw experimental absorbance data. Top right: absorbance data reproduced by the  $[A \rightarrow B, B \rightarrow C]$  kinetic model. Center left: model residuals as a function of wavelength. Bottom left: concentration profiles and molar absorptivity curves reconstructed by the kinetic model. Center right: single-wavelength absorbance traces at 464 nm and 660 nm as a function of time, with monoexponential ( $k_{1,obs}$ ,  $k_{2,obs}$ ) and kinetic model ( $k_p$ ,  $k_d$ ) fits superimposed. Bottom right: single-wavelength residuals as a function of time.

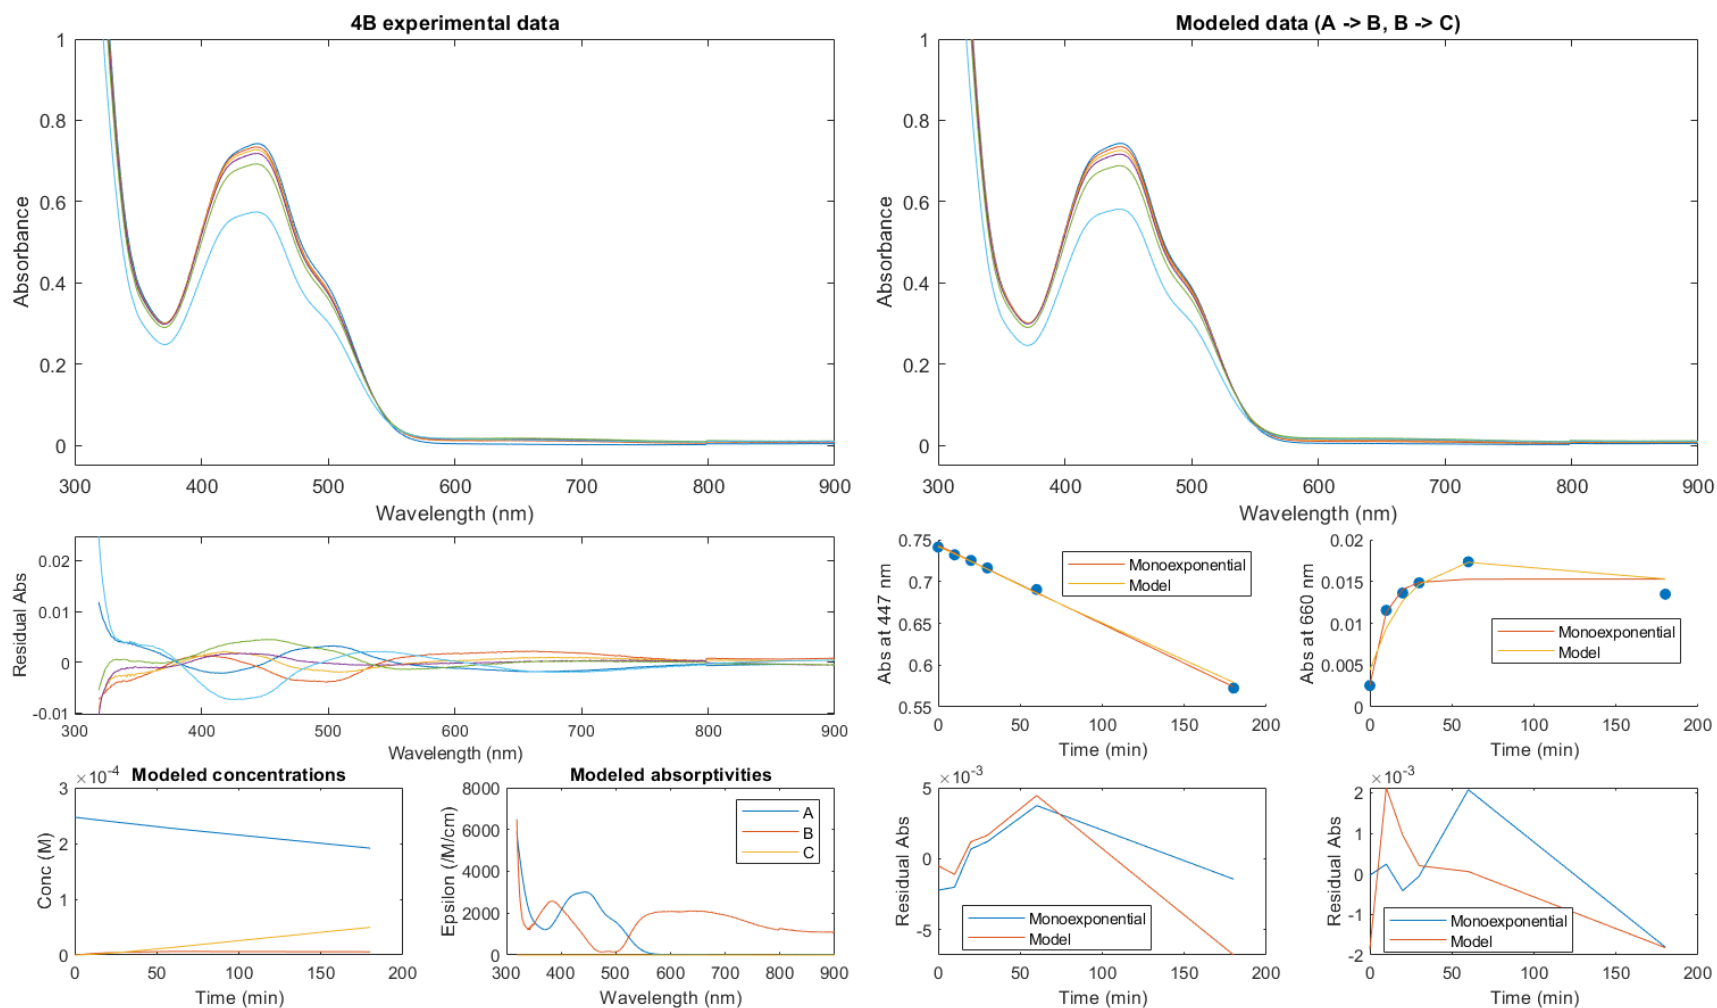

**Figure S34.** Kinetic modeling fit to **4B**. Top left: raw experimental absorbance data. Top right: absorbance data reproduced by the  $[A \rightarrow B, B \rightarrow C]$  kinetic model. Center left: model residuals as a function of wavelength. Bottom left: concentration profiles and molar absorptivity curves reconstructed by the kinetic model. Center right: single-wavelength absorbance traces at 447 nm and 660 nm as a function of time, with monoexponential ( $k_{1,obs}$ ,  $k_{2,obs}$ ) and kinetic model ( $k_p$ ,  $k_d$ ) fits superimposed. Bottom right: single-wavelength residuals as a function of time.

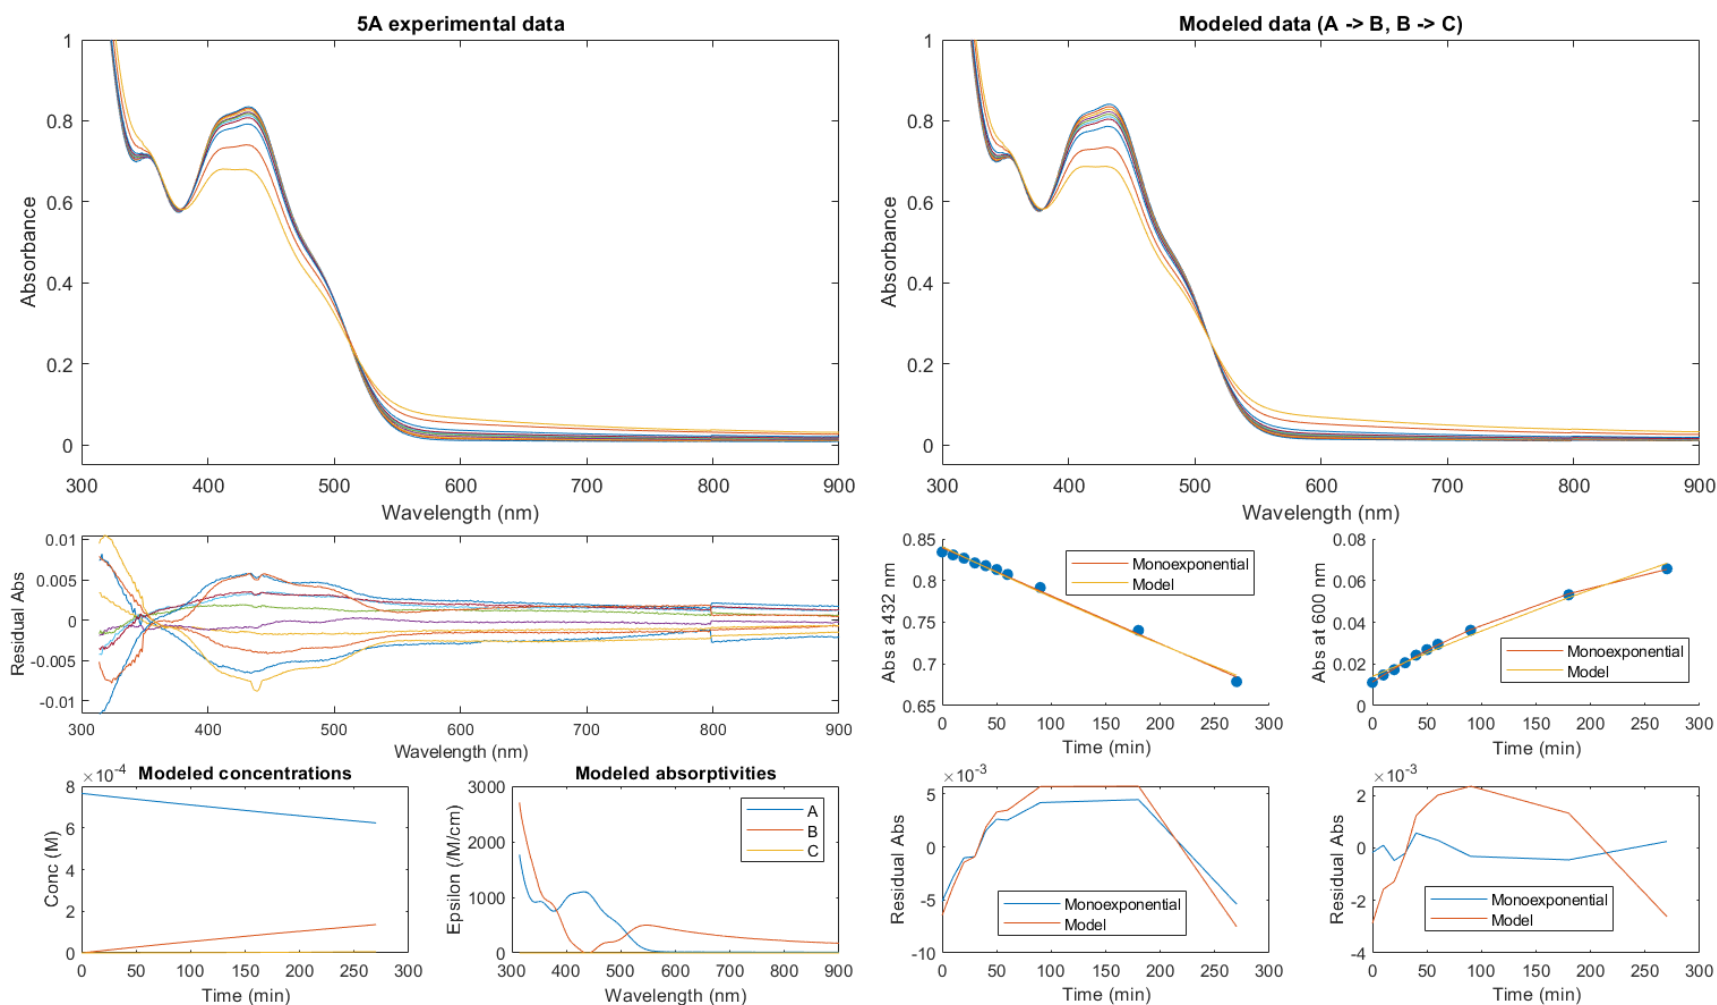

**Figure S35.** Kinetic modeling fit to **5A**. Top left: raw experimental absorbance data. Top right: absorbance data reproduced by the  $[A \rightarrow B, B \rightarrow C]$  kinetic model. Center left: model residuals as a function of wavelength. Bottom left: concentration profiles and molar absorptivity curves reconstructed by the kinetic model. Center right: single-wavelength absorbance traces at 432 nm and 600 nm as a function of time, with monoexponential ( $k_{1,obs}$ ,  $k_{2,obs}$ ) and kinetic model ( $k_p$ ,  $k_d$ ) fits superimposed. Bottom right: single-wavelength residuals as a function of time.

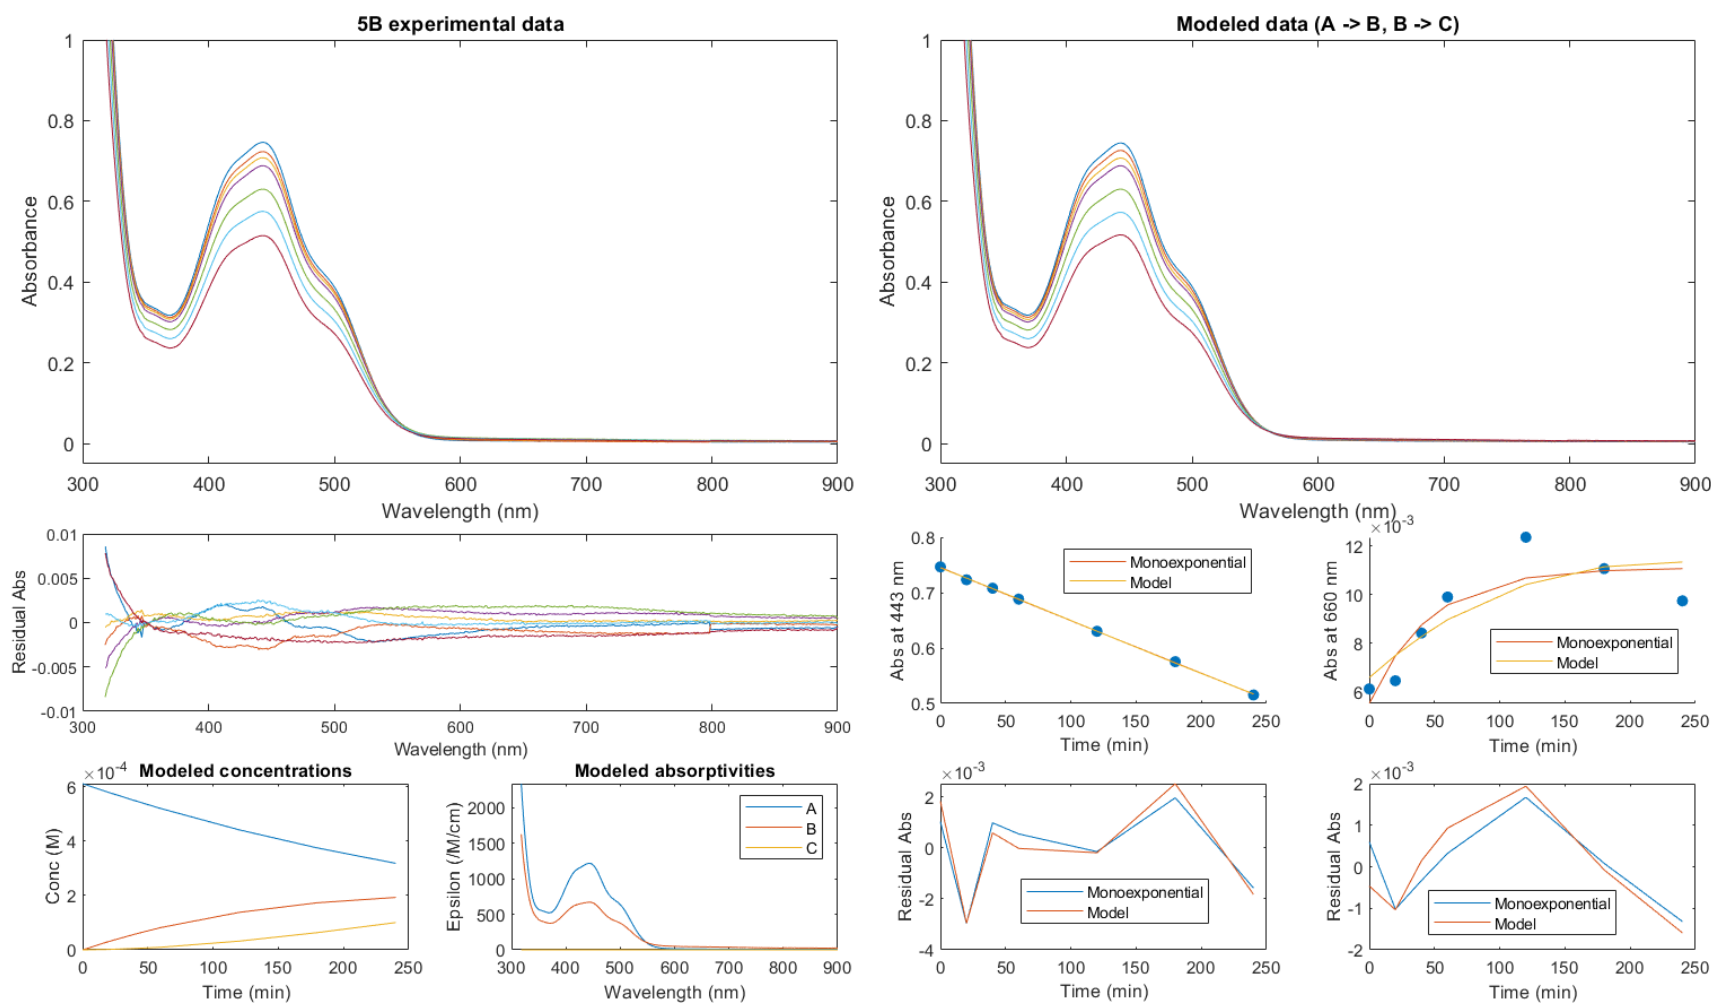

**Figure S36.** Kinetic modeling fit to **5B**. Top left: raw experimental absorbance data. Top right: absorbance data reproduced by the  $[A \rightarrow B, B \rightarrow C]$  kinetic model. Center left: model residuals as a function of wavelength. Bottom left: concentration profiles and molar absorptivity curves reconstructed by the kinetic model. Center right: single-wavelength absorbance traces at 443 nm and 660 nm as a function of time, with monoexponential ( $k_{1,obs}$ ,  $k_{2,obs}$ ) and kinetic model ( $k_p$ ,  $k_d$ ) fits superimposed. Bottom right: single-wavelength residuals as a function of time.

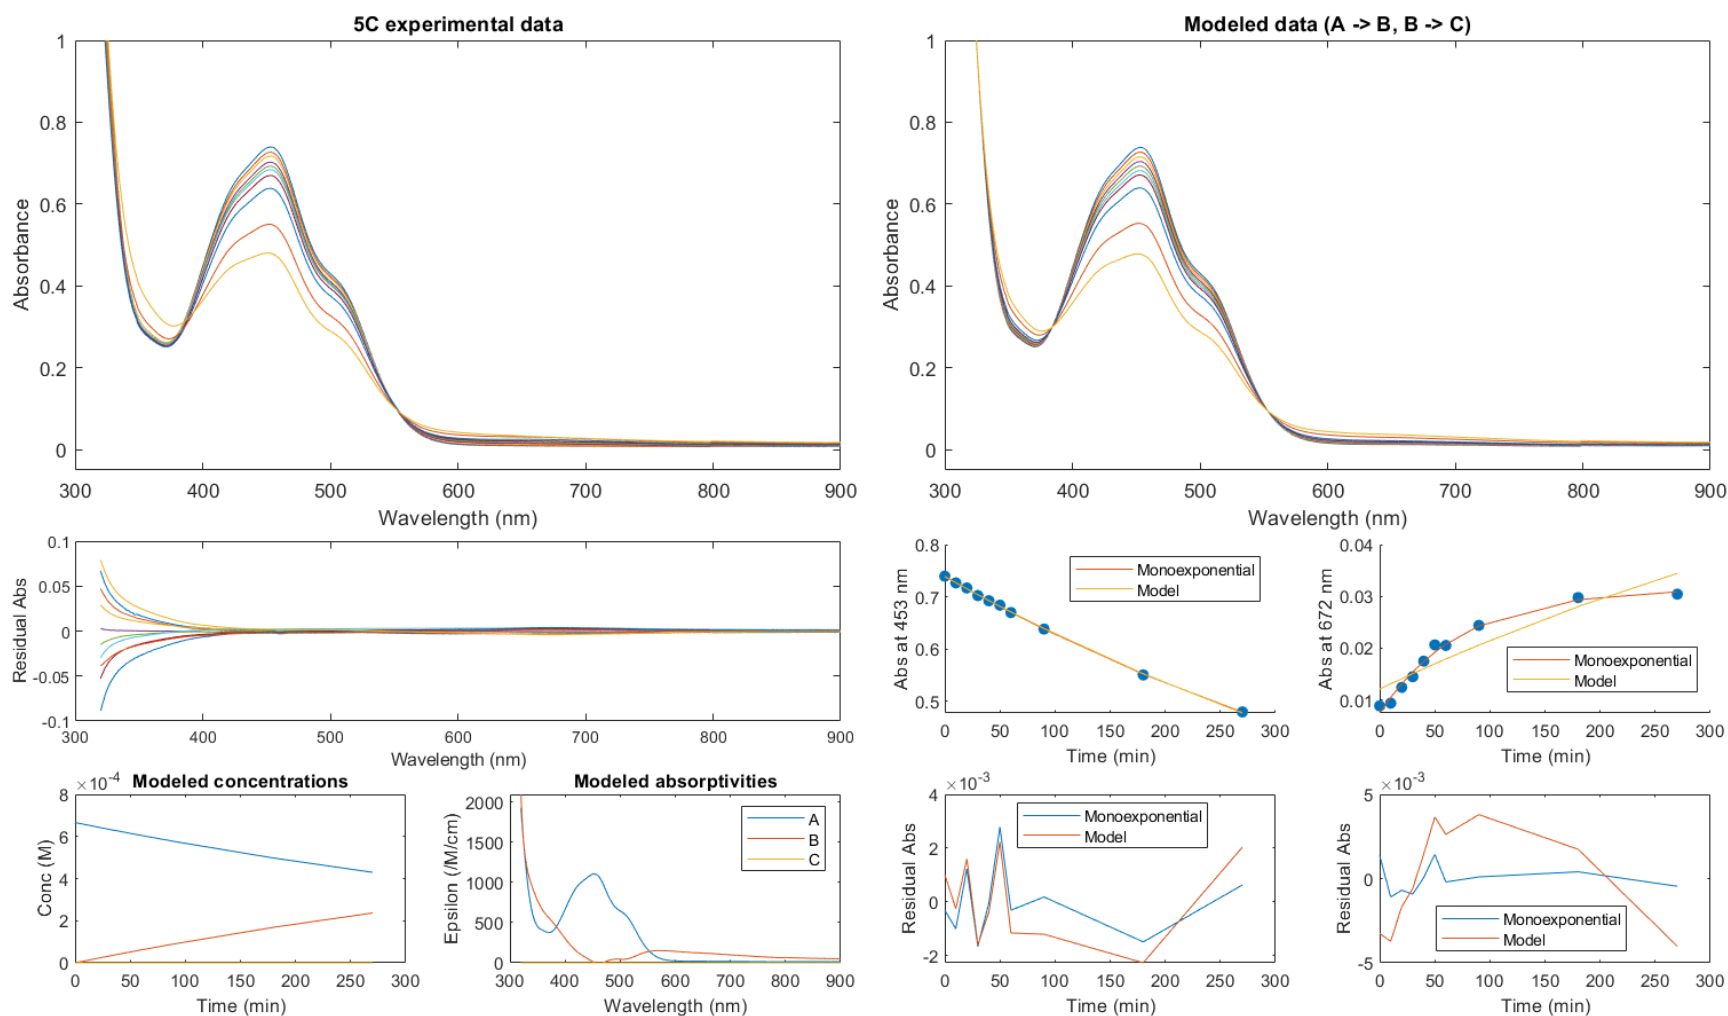

**Figure S37.** Kinetic modeling fit to **5C**. Top left: raw experimental absorbance data. Top right: absorbance data reproduced by the  $[A \rightarrow B, B \rightarrow C]$  kinetic model. Center left: model residuals as a function of wavelength. Bottom left: concentration profiles and molar absorptivity curves reconstructed by the kinetic model. Center right: single-wavelength absorbance traces at 453 nm and 672 nm as a function of time, with monoexponential ( $k_{1,obs}$ ,  $k_{2,obs}$ ) and kinetic model ( $k_p$ ,  $k_d$ ) fits superimposed. Bottom right: single-wavelength residuals as a function of time.

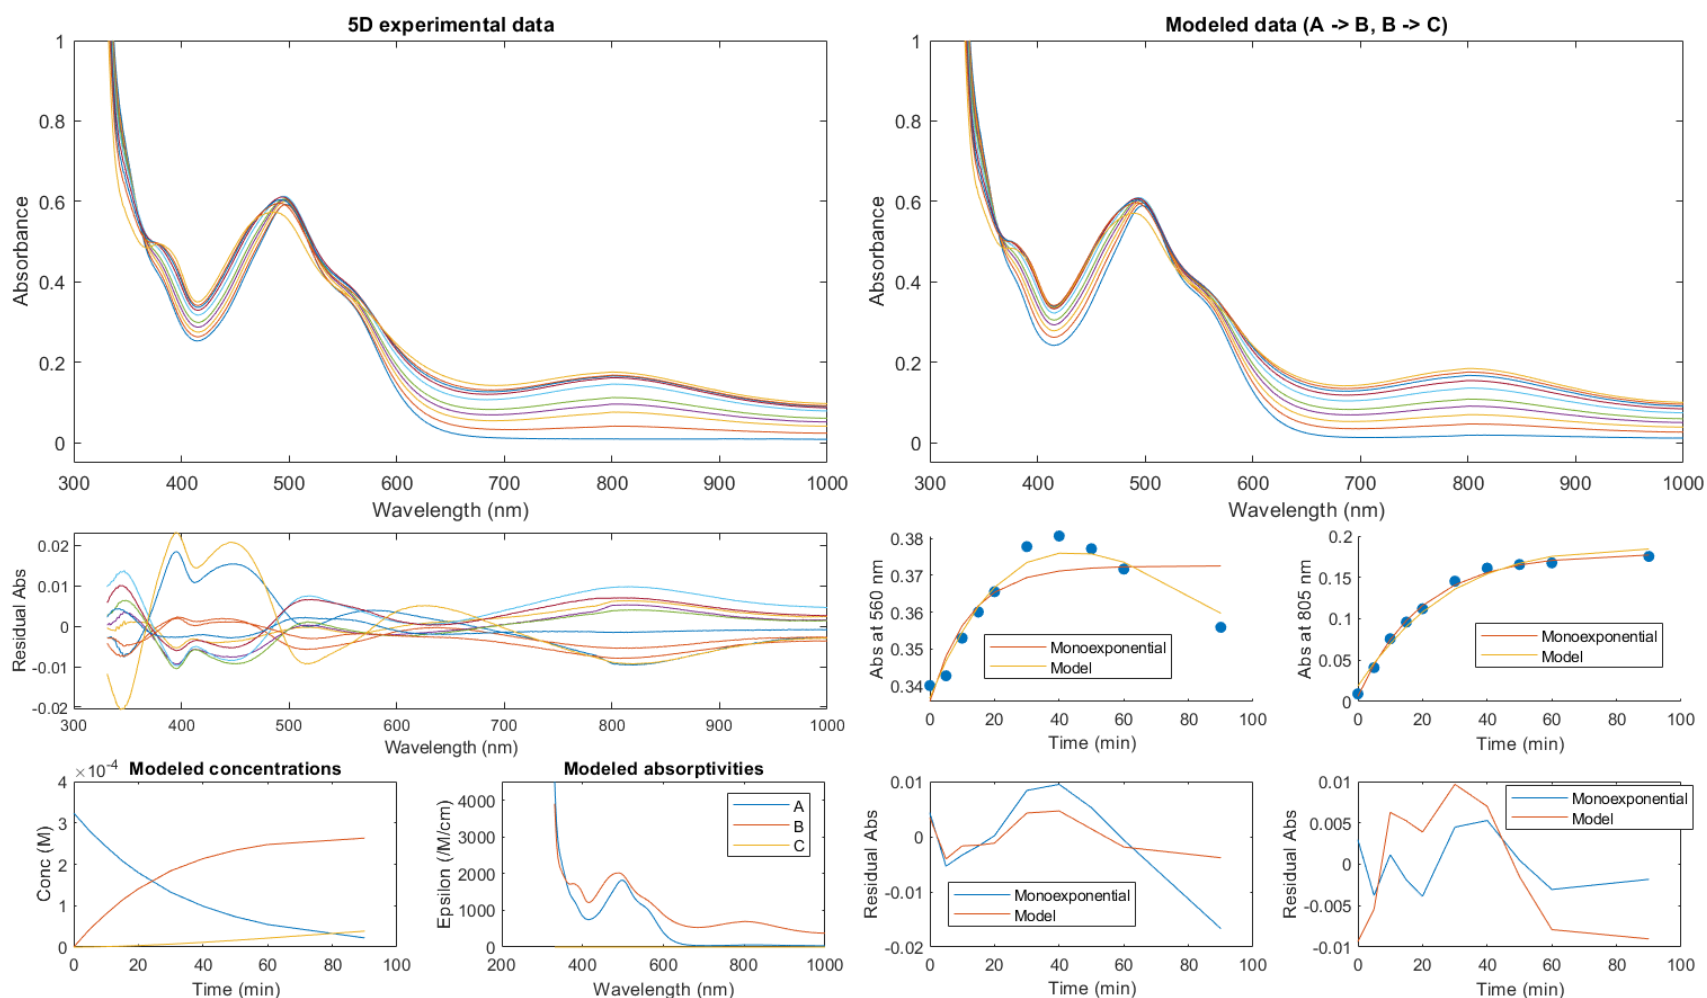

**Figure S38.** Kinetic modeling fit to **5D**. Top left: raw experimental absorbance data. Top right: absorbance data reproduced by the  $[A \rightarrow B, B \rightarrow C]$  kinetic model. Center left: model residuals as a function of wavelength. Bottom left: concentration profiles and molar absorptivity curves reconstructed by the kinetic model. Center right: single-wavelength absorbance traces at 560 nm and 805 nm as a function of time, with monoexponential ( $k_{1,obs}$ ,  $k_{2,obs}$ ) and kinetic model ( $k_p$ ,  $k_d$ ) fits superimposed. Bottom right: single-wavelength residuals as a function of time.

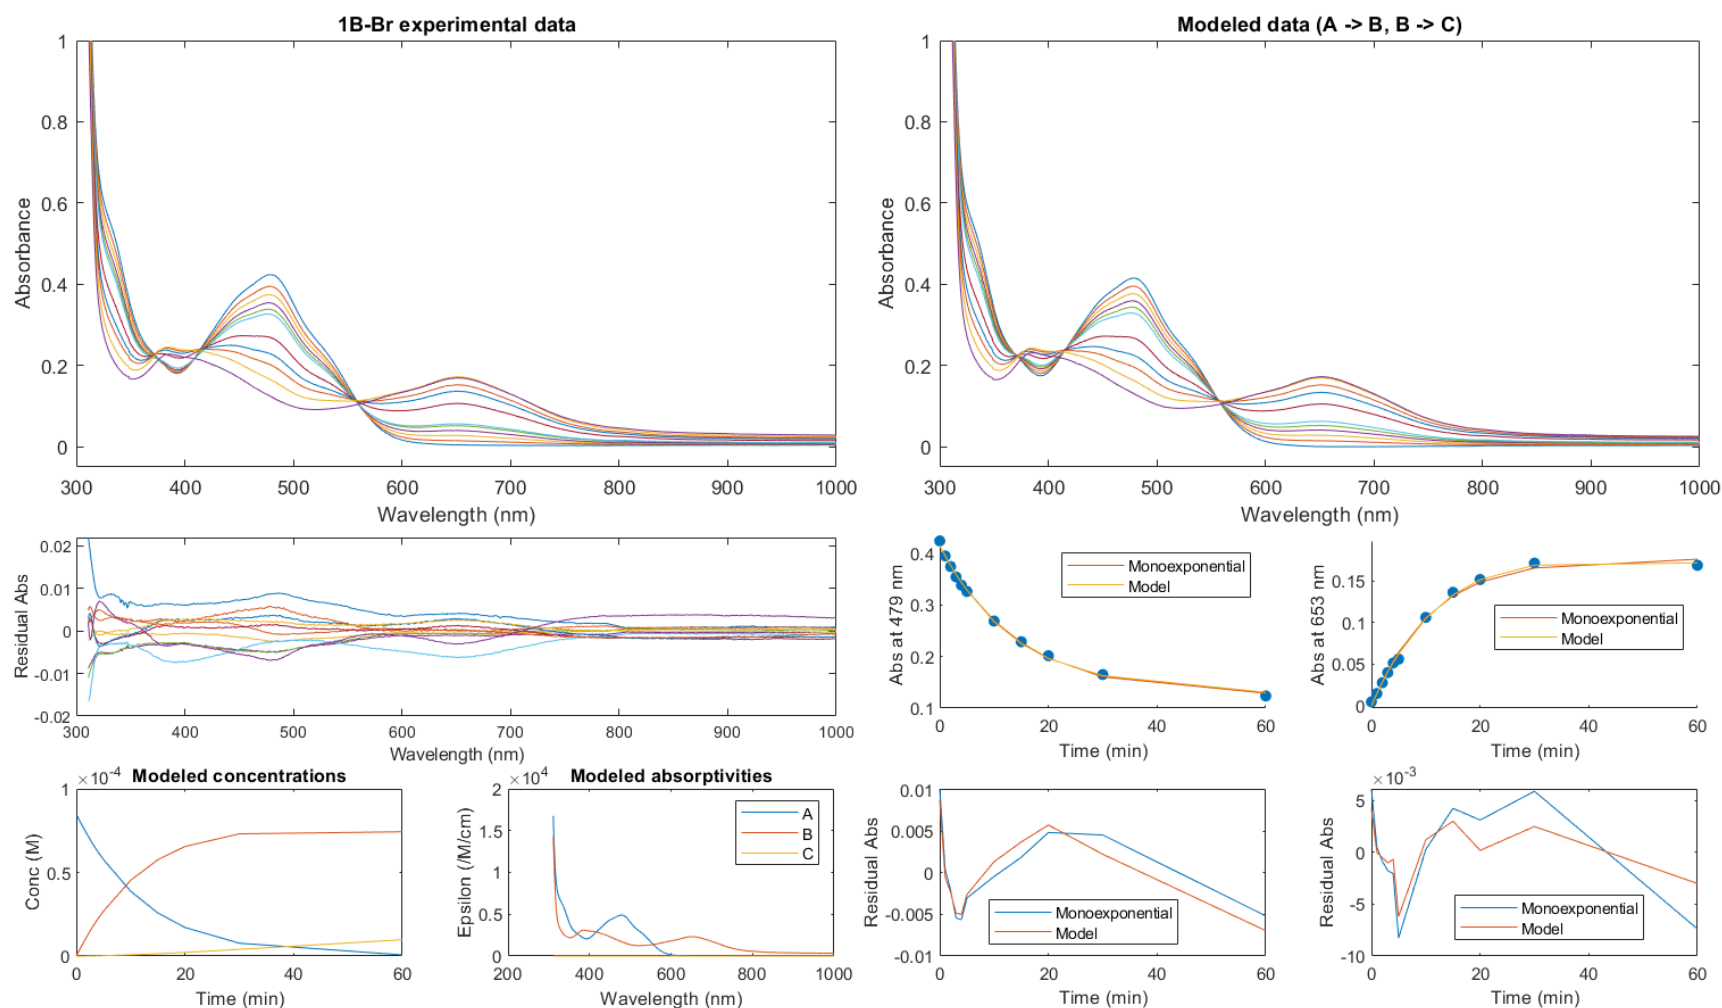

**Figure S39.** Kinetic modeling fit to **1B-Br**. Top left: raw experimental absorbance data. Top right: absorbance data reproduced by the  $[A \rightarrow B, B \rightarrow C]$  kinetic model. Center left: model residuals as a function of wavelength. Bottom left: concentration profiles and molar absorptivity curves reconstructed by the kinetic model. Center right: single-wavelength absorbance traces at 479 nm and 653 nm as a function of time, with monoexponential ( $k_{1,obs}$ ,  $k_{2,obs}$ ) and kinetic model ( $k_p$ ,  $k_d$ ) fits superimposed. Bottom right: single-wavelength residuals as a function of time.



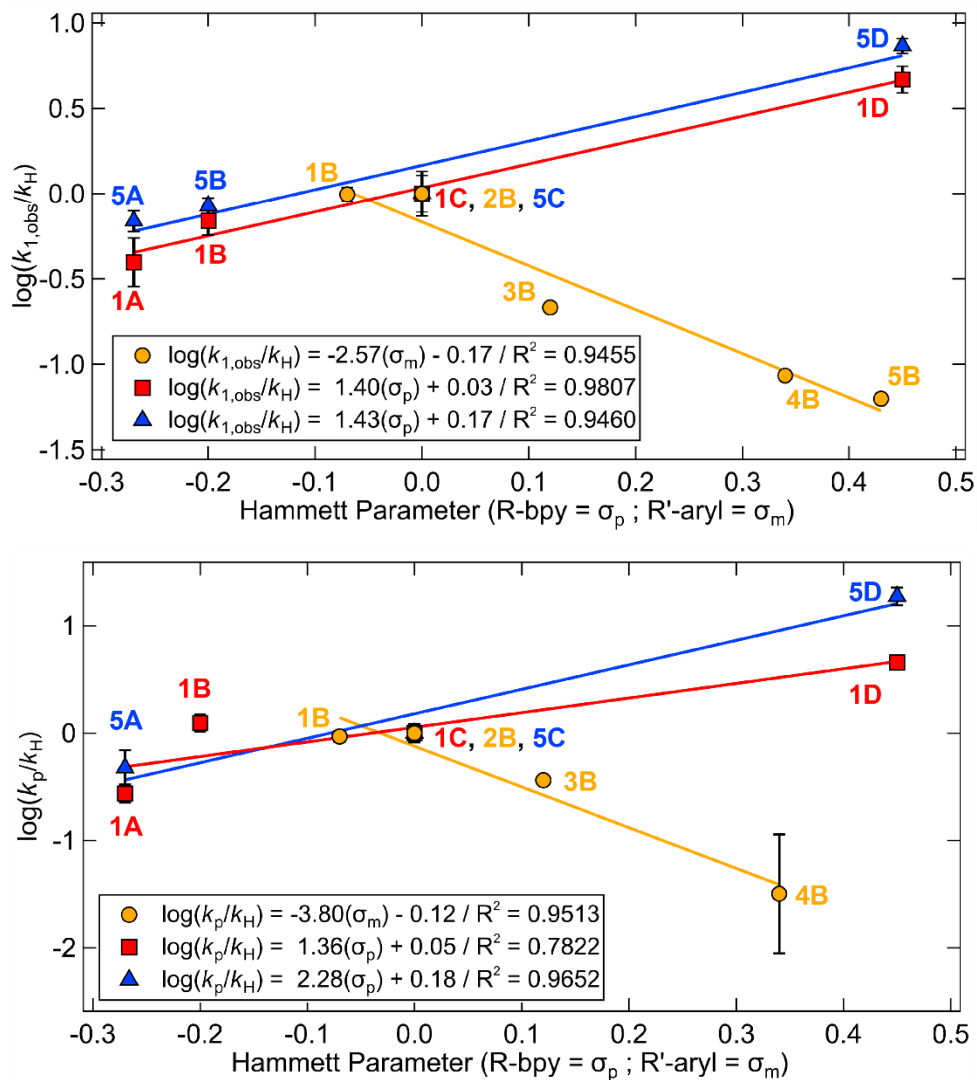

**Figure S40.** Comparison between Hammett plots made using experimentally obtained rate constants,  $\log(k_{1,obs}/k_H)$  (top, from main text Figure 5), and rate constants obtained via the global kinetics model,  $\log(k_p/k_H)$  (bottom). For  $k_{1,obs}$ , compound **1A** is approximated by  $k_{2,obs}$ ; for  $k_p$ , compound **5B** was omitted owing to poor convergence of the global kinetics model.

Molar absorptivity curves for the monomer **B** can also be extracted from the global analysis model. The extracted curves have the correct magnitude and a characteristic two-peaked shape. The normalized **B** absorptivity curves obtained from the model for the long-wavelength feature (~660 nm) are nearly identical to those obtained from the final time point of the kinetics absorbance data as expected (Figure S41), as only **B** absorbs in this spectral window. However, the global analysis also resolves the short-wavelength feature (~400 nm) in the spectral window where starting material and photolysis product overlap. By obtaining the peak maxima for both features (Table S4) and plotting against the appropriate Hammett parameters (see Figure 3B in the text), we can then further support the three-coordinate monomeric identity of the photolysis product.

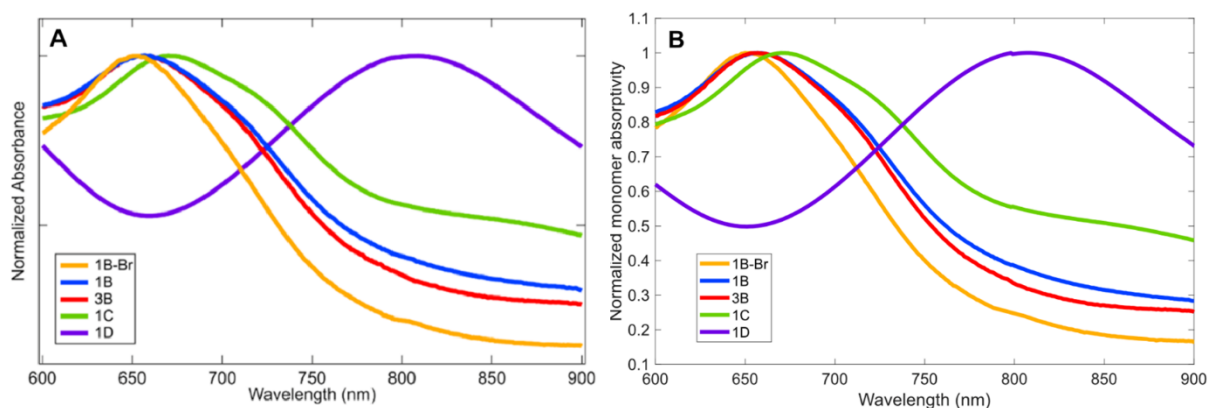

**Figure S41.** Comparison of normalized absorptivity curves obtained from (A) the normalized final absorbance traces from each experimental dataset and (B) the normalized absorptivity curve for species **B** in the  $[A \rightarrow B, B \rightarrow C]$  global kinetics model.

**Table S4.** Peak maxima for photolysis product **B** absorption features obtained from global kinetic fitting. Molar absorptivity curves extracted from the  $[A \rightarrow B, B \rightarrow C]$  reaction model with nonabsorbing **C**.

| Dataset | Peak 1 ( $\text{cm}^{-1}$ ) | Peak 2 ( $\text{cm}^{-1}$ ) |
|---------|-----------------------------|-----------------------------|
| 1A      | 25840                       | 17330                       |
| 1B      | 23700                       | 15220                       |
| 1C      | 23200                       | 14930                       |
| 1D      | 19120                       | 12390                       |
| 2B      | 23920                       | 15110                       |
| 3B      | 22620                       | 15220                       |
| 4B      | 26400                       | 15337                       |
| 5A      | 27170                       | 18280                       |
| 5C      | 26730                       | 17610                       |
| 5D      | 20530                       | 12500                       |
| 1B-Br   | 25906                       | 15380                       |

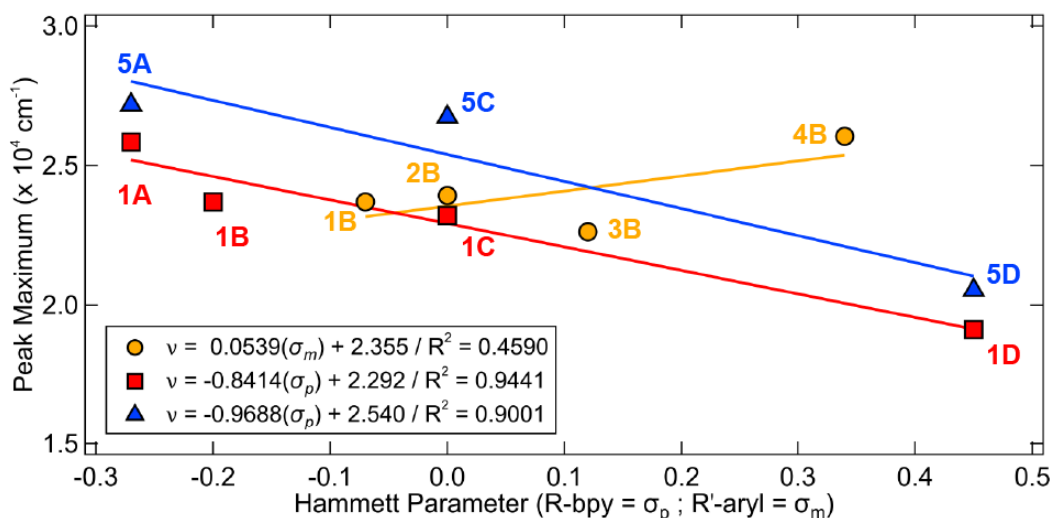

**Figure S42.** Hammett plot of monomer absorption peak 1 (higher energy). Complex **5B** was omitted owing to poor convergence of the global kinetics model.

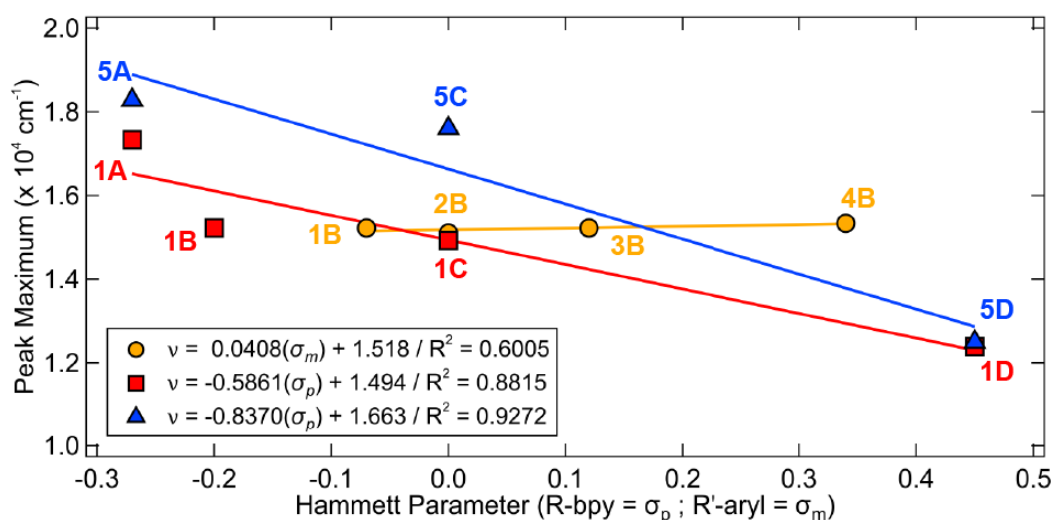

**Figure S43.** Hammett plot of monomer absorption peak 2 (lower energy). Complex **5B** was omitted owing to poor convergence of the global kinetics model.

Figures S42–S43 show that both absorbance features of **B** shift linearly with a similar slope against the Hammett parameter when varying the bpy ligand (**1A–1D** and **5A–5D**). This observation is consistent with the inclusion of the bpy ligand in the photolysis product **B**. However, the absorbance features of **B** show no systematic shift when varying the aryl substituent in the starting material (**1B–5B**). This result is consistent with the loss of the aryl in the photolysis step prior to the formation of **B**, supporting its identity as three-coordinate monomeric  $\text{Ni}(\text{R}^{\text{bpy}})\text{X}$ ,  $\text{X} = \text{Cl}, \text{Br}$ .<sup>9</sup>

### S1.10. Kinetic Trends and Miscellaneous Photolysis Data.

Concentration dependence studies were conducted on a range of starting absorbances (Figure S44). Again, **1B** was selected as a representative compound. The slight decrease in rate constant at the highest concentration is attributed to the inner filter effect. Overall, no appreciable change in the rate constant was detected across the range of concentrations tested ( $5.1 \times 10^{-5} \text{ M} - 2.1 \times 10^{-4} \text{ M}$ ). Kinetic analysis yields a unimolecular, first order decay for the reaction.

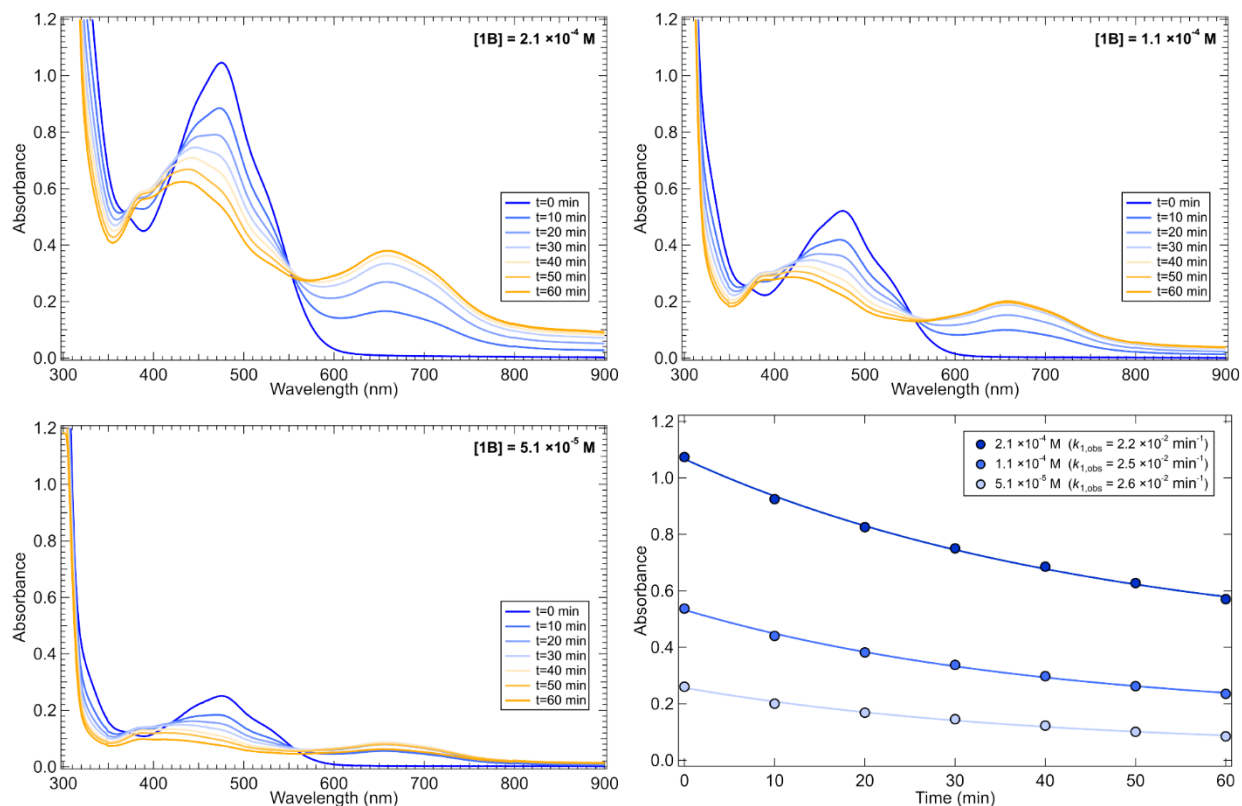

**Figure S44.** Concentration dependence studies on **1B** in THF. Decay of the complex was measured at 475 nm.

**Table S5.** Concentration dependence kinetic data for **1B** in THF.

| Experiment | [ <b>1B</b> ] <sub>0</sub> ( $\times 10^{-4} \text{ M}$ ) | Initial Rate ( $\times 10^{-6} \text{ M min}^{-1}$ ) |
|------------|-----------------------------------------------------------|------------------------------------------------------|
| 1          | 2.11                                                      | 4.64                                                 |
| 2          | 1.05                                                      | 2.63                                                 |
| 3          | 0.51                                                      | 1.33                                                 |

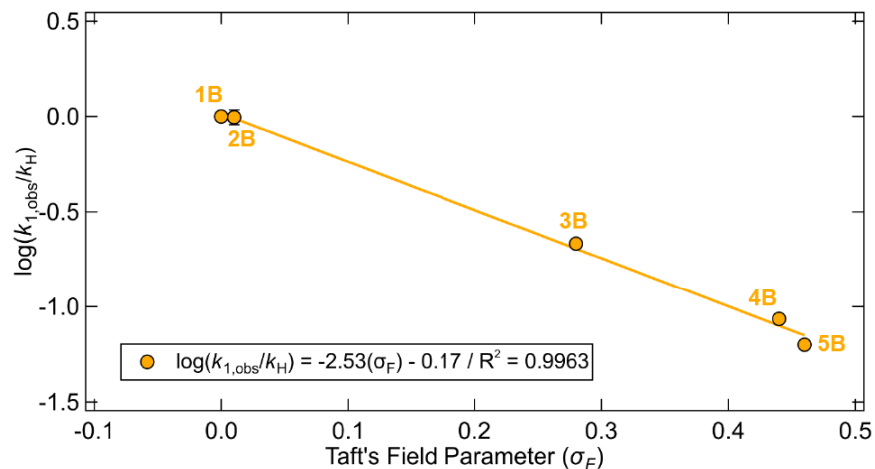

**Figure S45.** Correlation between normalized rates of homolysis of the aryl series (**1B–5B**) and Taft's field parameter,  $\sigma_F$ .<sup>6</sup>

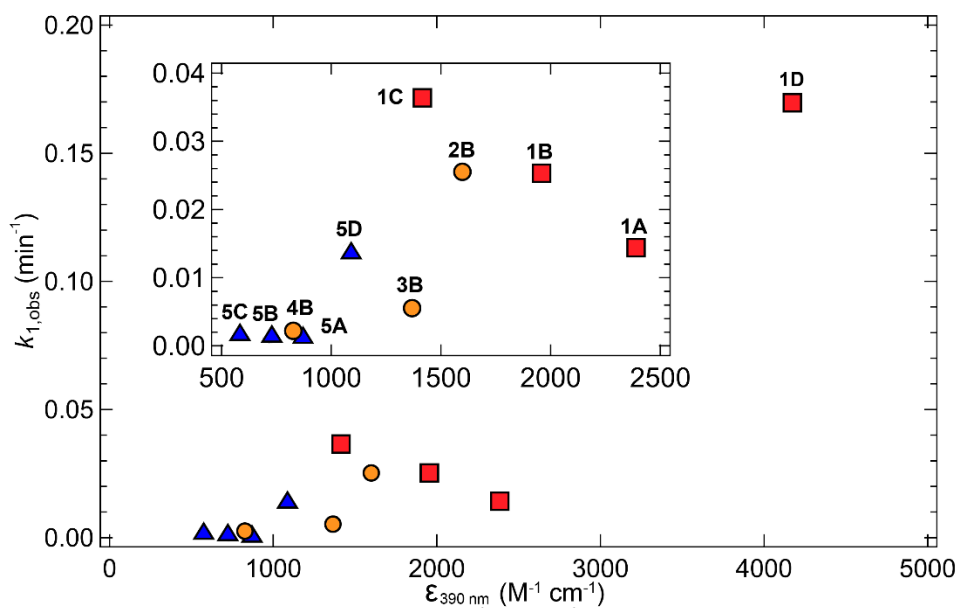

**Figure S46.** Plot of the observed photolysis rate constant versus the molar absorptivity at the incident light wavelength (390 nm). A linear trend (likely with positive slope) is expected if there is a rate dependence on the molar absorptivity. However, complexes **1A–1D** and **5A–5D** do not see this trend. Compounds **1B–5B** may see a trend weakly ( $R^2 = 0.80$ ).

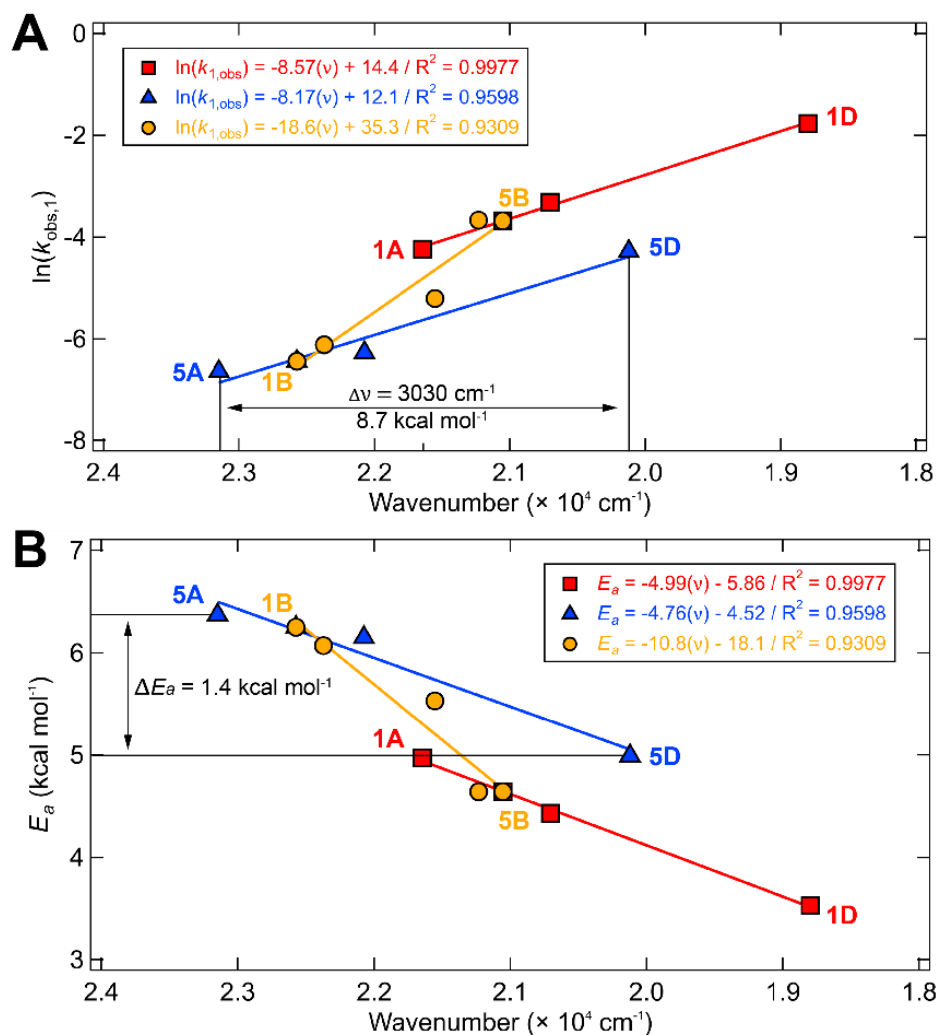

**Figure S47.** (A) Comparison between the change in energy of the MLCT peak maxima and (B) the change in energy for the energetic barrier for photolysis between **5A** and **5D**. Barriers are calculated using the Arrhenius equation assuming a uniform preexponential factor and are normalized to the experimental value obtained for **1B**.

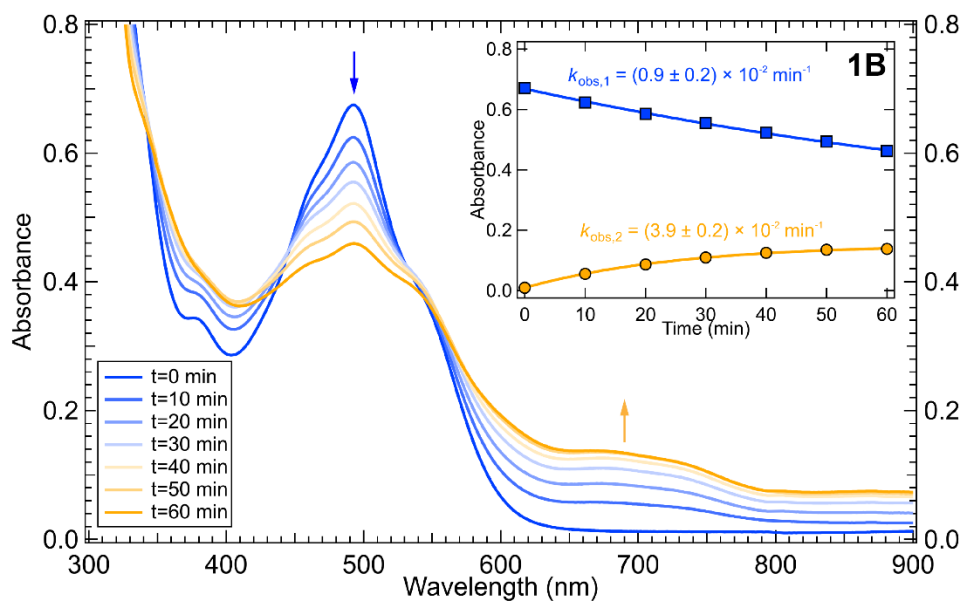

**Figure S48.** Photolysis profile of **1B** in toluene ( $\lambda_{\text{max}}$  is red shifted from 475 nm THF to 493 nm in toluene:  $\Delta\nu_{\text{max}} = 770 \text{ cm}^{-1}$ ). Photolysis kinetics were monitored at two wavelengths indicated by the blue and orange arrows in each panel. Insets correspond to the fitted kinetic data (blue curve for the decay of the starting material, orange curve for the formation of the new species). Data were fit using first-order kinetics; error bars are one standard deviation.

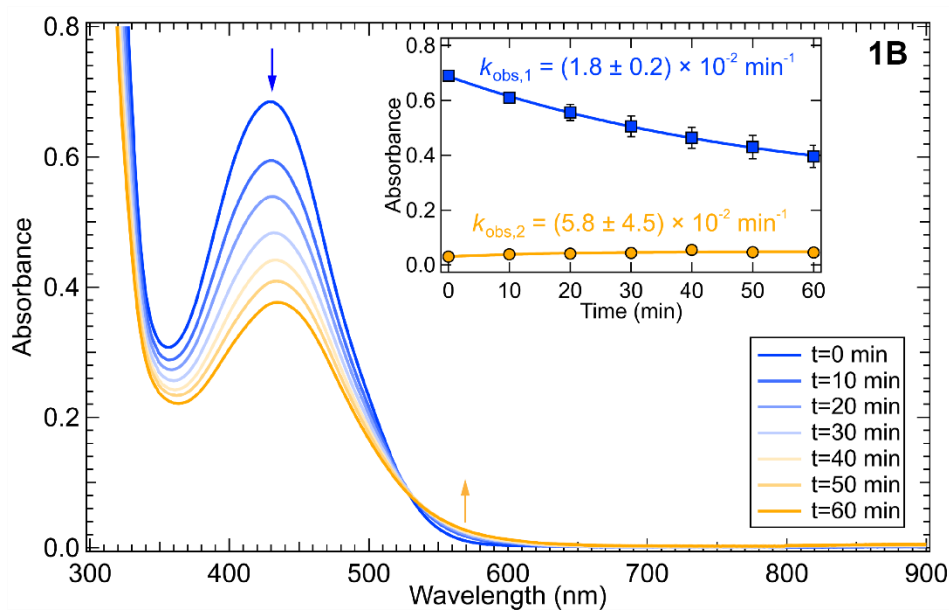

**Figure S49.** Photolysis profile of **1B** in DMF ( $\lambda_{\text{max}}$  is blue shifted from 475 nm THF to 429 nm in DMF:  $\Delta\nu_{\text{max}} = 2260 \text{ cm}^{-1}$ ). Photolysis kinetics were monitored at two wavelengths indicated by the blue and orange arrows in each panel. Insets correspond to the fitted kinetic data (blue curve for the decay of the starting material, orange curve for the formation of the new species). Data were fit using first-order kinetics; error bars are one standard deviation. Note that the absorption of the new species is seen only in small amounts, possibly the result of a competing supply and removal via a decomposition pathway (see kinetics model,  $k_d [\mathbf{B} \rightarrow \mathbf{C}]$ ) or other solvent effect.

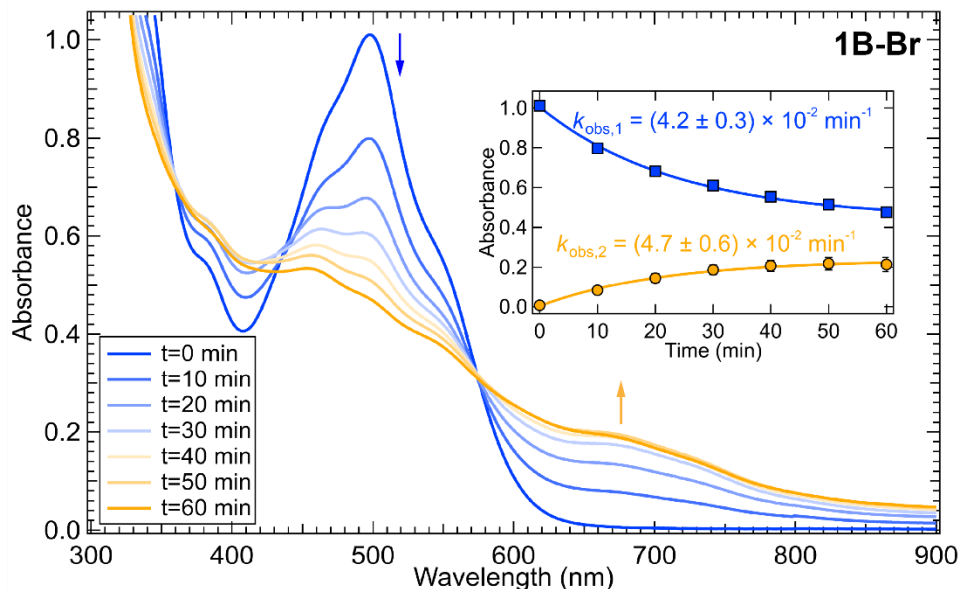

**Figure S50.** Photolysis profile of **1B-Br** in toluene ( $\lambda_{\text{max}}$  is red shifted from 479 nm in THF to 499 nm in toluene:  $\Delta\nu_{\text{max}} = 840 \text{ cm}^{-1}$ ). Photolysis kinetics were monitored at two wavelengths indicated by the blue and orange arrows in each panel. Insets correspond to the fitted kinetic data (blue curve for the decay of the starting material, orange curve for the formation of the new species). Data were fit using first-order kinetics; error bars are one standard deviation.

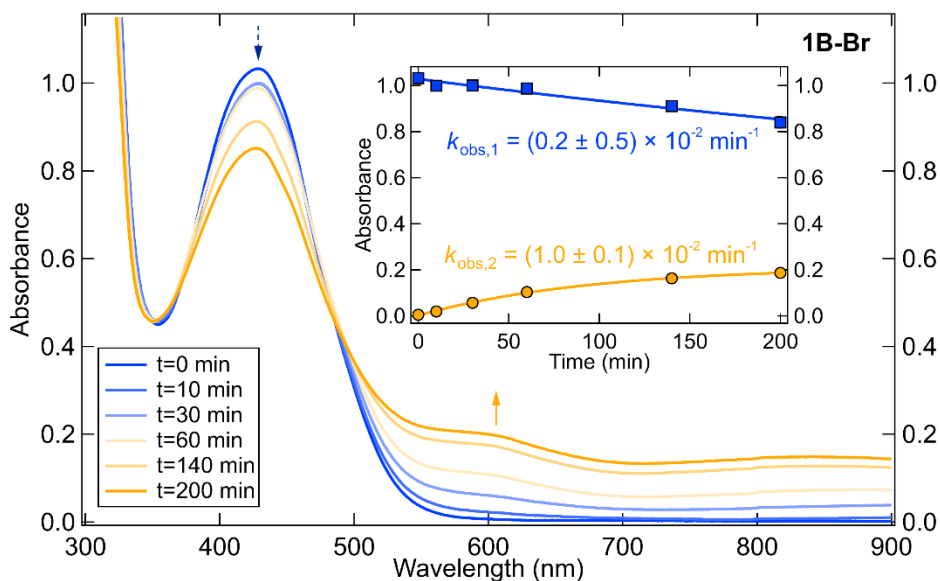

**Figure S51.** Photolysis profile of **1B-Br** in dimethylformamide, DMF ( $\lambda_{\text{max}}$  is blue shifted from 479 nm in THF to 428 nm in DMF:  $\Delta\nu_{\text{max}} = 2490 \text{ cm}^{-1}$ ). Photolysis kinetics were monitored at two wavelengths indicated by the blue and orange arrows in each panel. Inset corresponds to the first-order kinetics fitted data (blue curve for the decay of the starting material, orange curve for the formation of the new species). Error bars are one standard deviation. Note that the absorption of the new species precludes definitive assignment of  $k_{1,\text{obs}}$  for this compound from  $\lambda_{\text{max}}$  of the starting material. Nevertheless, a slower photolysis rate is observed for this complex in DMF than in THF (main text, Figure 6).



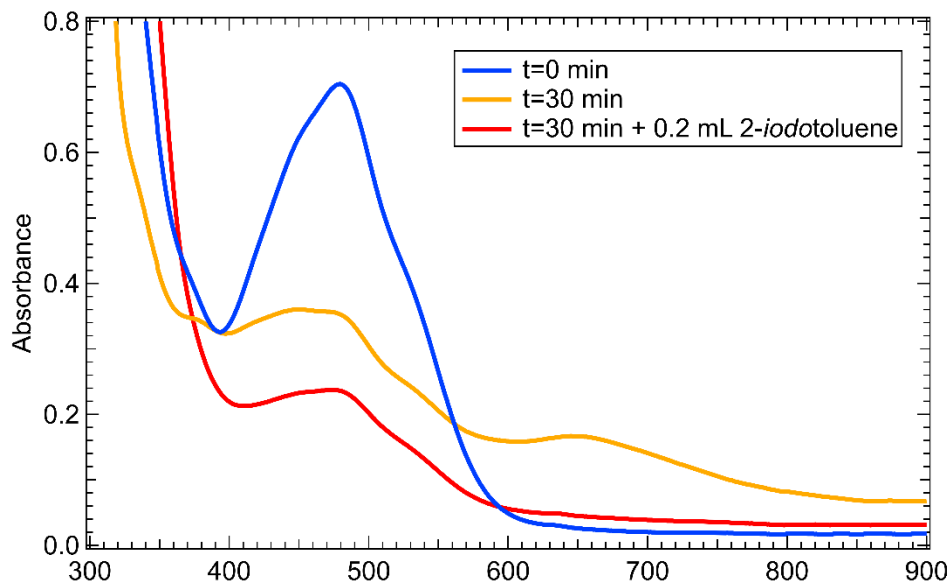

**Figure S52.** Photolysis experiment of **1B-Br** in THF showing the formation of the photoproduct (orange line, primary peak at 653 nm) which is subsequently quenched by the addition of 0.2 mL of 2-iodotoluene (red line). The resultant spectrum shows broadened absorbance features tailing to long wavelengths.

### S1.11. Quantum Yield Determination.

Quantum yields were calculated using the method developed by Gescheidt et al.<sup>13</sup> For the unimolecular, first order photolysis reaction given in equation S1, the following rate expression may be written (eq. S2):

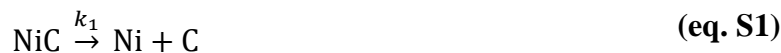

$$\text{rate} = -\frac{d[\text{NiC}]}{dt} = k_1[\text{NiC}] \quad (\text{eq. S2})$$

The rate of the reaction is proportional to the intensity of photons absorbed by the starting material,  $I_{Abs}^{\text{NiC}}$  (in mol L<sup>-1</sup> s<sup>-1</sup>), and the quantum yield for the photochemical conversion process,  $\Phi$ . Therefore, the rate can also be written as equation S3.

$$-\frac{d[\text{NiC}]}{dt} = I_{Abs}^{\text{NiC}} \Phi \quad (\text{eq. S3})$$

Combining equations S2 and S3 and rearranging gives equation S4.

$$\Phi = \frac{k_1[\text{NiC}]}{I_{Abs}^{\text{NiC}}} \quad (\text{eq. S4})$$

Application of the Beer-Lambert law gives equation S5, where  $I_0^{\text{NiC}}$  is the initial intensity of photons received by the reactant solution from the light source (i.e., the photon flux in mol L<sup>-1</sup> s<sup>-1</sup>). Combining eq. S4 and eq. S5 and considering initial starting conditions ( $t = 0$ , more details are provided in reference 11) gives equation S6, where  $\lambda$  is the primary wavelength of the light source (in meters),  $P_{LED}$  is the power of the light source (in J s<sup>-1</sup>),  $h$  is Planck's constant,  $c$  is the speed of light in a vacuum,  $N_A$  is Avogadro's constant, and  $V$  is the volume of the reactant solution irradiated (in liters). Note that the value,  $Abs_{\text{NiC}}^{390}$ , is the measured absorbance of the reactant solution at the primary light source wavelength (most commonly 390 x10<sup>-9</sup> m in our study).

$$I_{Abs}^{\text{NiC}} = I_0^{\text{NiC}} \left(1 - 10^{-Abs_{\text{NiC}}^{390}}\right) \quad (\text{eq. S5})$$

$$\Phi = \frac{k_1[\text{NiC}]}{I_0^{\text{NiC}} \left(1 - 10^{-Abs_{\text{NiC}}^{390}}\right)}; I_0^{\text{NiC}} = \frac{\lambda P_{LED}}{hcN_a V} \quad (\text{eq. S6})$$

Rearranging and bringing the constants to the front yields equation S7. Note that in our case, all standard photolysis experiments were conducted with a constant volume (0.0025 L) and at a constant distance from the same light source (i.e., constant  $P_{LED}$ ). Therefore, these are also brought to the front of the equation.

$$\Phi = \frac{hcN_a V}{\lambda P_{LED}} \frac{k_1[\text{NiC}]}{1 - 10^{-Abs_{\text{NiC}}^{390}}} \quad (\text{eq. S7})$$

Absolute quantum yield determination by equation S7 necessitates the careful identification of the power of the light source through actinometry or calibrated instruments. Using a Thorlabs S425C thermal detector power meter 5 cm away from the light source, we determined the power of the PR160L 390 nm LED to be 198 W cm<sup>-2</sup>. Given an irradiation surface area of 2.5 cm<sup>2</sup>, we found  $P_{LED} = 0.494$  W. We further note that eq. S7 assumes the absorption band monitored ( $Abs_{NiC}^{390}$ ) is comprised of only one transition. A recent report by Park et al.<sup>8</sup> proposes possible low intensity ligand field transitions which overlap with the dominant MLCT bands in the absorption spectra of related Ni–bipyridine complexes. While we cannot rule out the presence of an obscured ligand field transition at 390 nm, computational analysis suggests that the observed absorption band is a charge transfer transition ( $d(yz) \rightarrow \pi^*(2)$ , for more details see Tables S10-S11). Therefore, we tentatively calculate the quantum yields of our complexes (Figure S53).

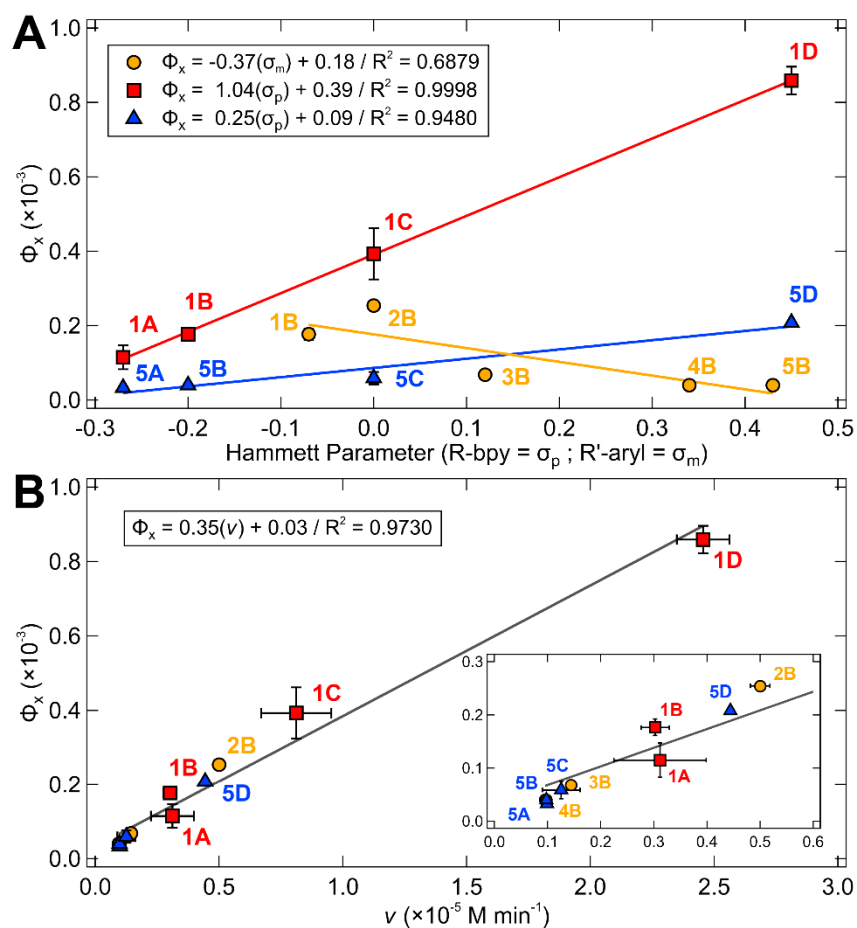

**Figure S53.** (A) Plot of the quantum yield in THF obtained by equation S7 using  $P_{LED} = 0.494$  W and the experimentally measured absorbance at 390 nm for each complex versus the Hammett  $\sigma$  parameter for a given complex. The error in the aryl series (1B–5B, orange line) likely arises from an overestimation in rate for 2B, which is also our most air/moisture sensitive compound. (B) The calculated quantum yields trend linearly with the observed rate of decay of the Ni(II)–bpy complexes ( $R^2 = 0.9730$ ).

By normalizing the quantum yield of a given reactant,  $\Phi_x$ , to that of its unsubstituted counterpart,  $\Phi_H$ , (both defined in equation S8), we arrive at equation S9 in the same style as a Hammett kinetic analysis. These relative quantum yields allow for the examination of substituent effects and trends across our three series of complexes, **1A-1D**, **5A-5D**, and **1B-5B**.

$$\Phi_x = \frac{hcN_aV}{\lambda P_{LED}} \frac{k_{1,x}[\text{NiC}]_x}{1 - 10^{-Abs_{\text{NiC}_x}^{390}}}; \Phi_H = \frac{hcN_aV}{\lambda P_{LED}} \frac{k_{1,H}[\text{NiC}]_H}{1 - 10^{-Abs_{\text{NiC}_H}^{390}}} \quad (\text{eq. S8})$$

$$\frac{\Phi_x}{\Phi_H} = \frac{k_{1,x}[\text{NiC}]_x}{k_{1,H}[\text{NiC}]_H} \left( \frac{1 - 10^{-Abs_{\text{NiC}_H}^{390}}}{1 - 10^{-Abs_{\text{NiC}_x}^{390}}} \right) \quad (\text{eq. S9})$$

Notably, the relative kinetic trends are mirrored by the relative quantum yield trends (Figure S54).

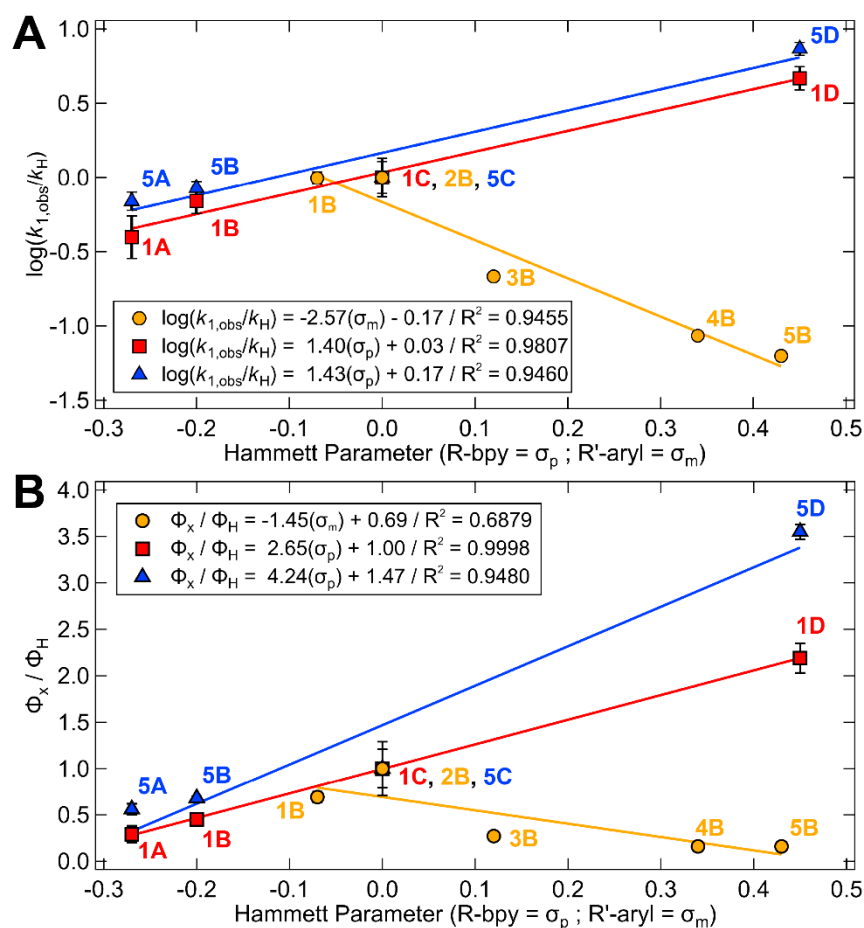

**Figure S54.** (A) Correlation between normalized rates of excited state bond homolysis and specific Hammett  $\sigma$  parameters of the bpy and aryl ligands. Note that in **1A**, the rate is approximated by  $k_{2,obs}$ . Reproduced from main text Figure 5 for ease of comparison. (B) Relative quantum yields for each series plotted against the Hammett parameter for each complex. The error in the aryl series (**1B-5B**, orange line) likely arises from an overestimation in rate for **2B**, which is also our most air/moisture sensitive compound.

## S2. Computational Section.

### S2.1. General Computational Considerations.

All the computations were performed using ORCA 5.0 software.<sup>14,15</sup>

#### *Density Functional Theory Calculations.*

The molecular structures were optimized with DFT using the BP86<sup>16,17</sup> functional with def2-TZVPP(Ni)+def2-TZVP basis set,<sup>18</sup> D3BJ dispersion correction,<sup>19,20</sup> and the CPCM solvation model (THF).<sup>21,22</sup> The calculations were expedited by expanding the Coulomb integrals in an auxiliary basis set, the resolution-of-identity (RI-J) approximation.<sup>23</sup> The unrestricted Kohn-Sham formalism was used to approximate the lowest-energy broken-symmetry singlet (BSS) and triplet spin states, which were confirmed by performing the Löwdin spin population analysis.<sup>24</sup> The Ni–C bond homolysis reaction coordinate was obtained from the relaxed one-dimensional PES scans by incrementally increasing the Ni–C bond distance by 0.2 Å from 1.90 Å (equilibrium distance) to 3.50 Å. On top of the optimized geometries, the electronic energy terms and molecular properties were evaluated using the hybrid B3LYP<sup>25,26</sup> functional with the same def2-TZVPP(Ni)+def2-TZVP basis set, D3BJ dispersion correction, CPCM solvation model, and RIJCOSX approximation.<sup>27</sup>

#### *Time-Dependent Density Functional Theory*

To inspect the excited-state PESs and compare computations with the experimental UV/Vis spectra, we have performed TD-DFT calculations (total of 150 roots) on top of the BSS geometries. Additionally, the triplet excited-state surfaces were obtained from the TD-DFT calculations in the triplet spin state on top of the BSS geometries.

#### *Multireference Calculations*

As implemented in ORCA 5.0, multiconfigurational/multireference approximations to wave function theory such as CASSCF,<sup>28,29</sup> NEVPT2,<sup>30–32</sup> QD-NEVPT2<sup>33,34</sup> were applied in the combination with the def2-TZVPP(Ni)+def2-TZVP basis set and CPCM (THF) on top of the DFT-optimized BSS geometries. State-averaged calculations with 15 singlets and 25 triplets were used. Complete active spaces included 10 electrons in 9 orbitals (10e, 9o): Ni d(yz), d(z<sup>2</sup>), d(xy), d(xz), a pair of bonding and antibonding Ni d(x<sup>2</sup>-y<sup>2</sup>)/aryl C(sp<sup>2</sup>) orbitals, and three bpy π\* orbitals.

#### *RI-SCS-MP2 and DLPNO-CCSD(T) Calculations*

For **1B**, we have also computed the Ni–C bond dissociation coordinate using RI-SCS-MP2<sup>35</sup> and DLPNO-CCSD(T)<sup>36,37</sup> methods, which were performed on top of the reference UHF wave functions. For these calculations, we have used the larger def2-QZVPP(Ni)+def2-QZVP basis set.<sup>15</sup>

Optimized structures of all of the studied complexes are attached as the XYZ coordinates in a separate zip archive.

## Sample Inputs

### Example DFT Geometry Optimization

```
! UKS BP86 def2-TZVP def2/J
!RI D3BJ Opt CPCM(THF)
!SlowConv MORead
%moinp "orca.ges"
%basis
newgto Ni "def2-TZVPP" end
end
%maxcore 3000

*xyzfile 0 1 orca.xyz
```

### Example TD-DFT Calculation

```
! UKS B3LYP def2-TZVP def2/J
!RIJCOSX TightSCF CPCM(THF)
!Normalprint MORead
%moinp "orca.ges"
%basis
newgto Ni "def2-TZVPP" end
end
%pal
nprocs 8
end
%maxcore 3000
%tddft
maxdim 5
nroots 150
end

*xyzfile 0 1 orca.xyz
```

### Example CASSCF/QD-NEVPT2 Calculation

```
! def2-TZVP AutoAUX RIJCOSX
!TightSCF CPCM(THF)
!MORead NormalPrint
%basis
newgto Ni "def2-TZVPP" end
end
%moinp "orca.ges"
%casscf
nel 10
norb 8
nroots 25,15
mult 3,1
TrafoStep RI
orbstep SuperCI
switchstep DIIS
MaxIter 500
etol 3e-7
printwf 1
ptmethod sc_nevpt2
ptsettings
qdtype qd_vanvleck
end
rel
printlevel 3
dosoc true
gtensor true
dtensor true
end
end
%pal
nprocs 8
end
%maxcore 16000

* xyzfile 0 1 orca.xyz
```

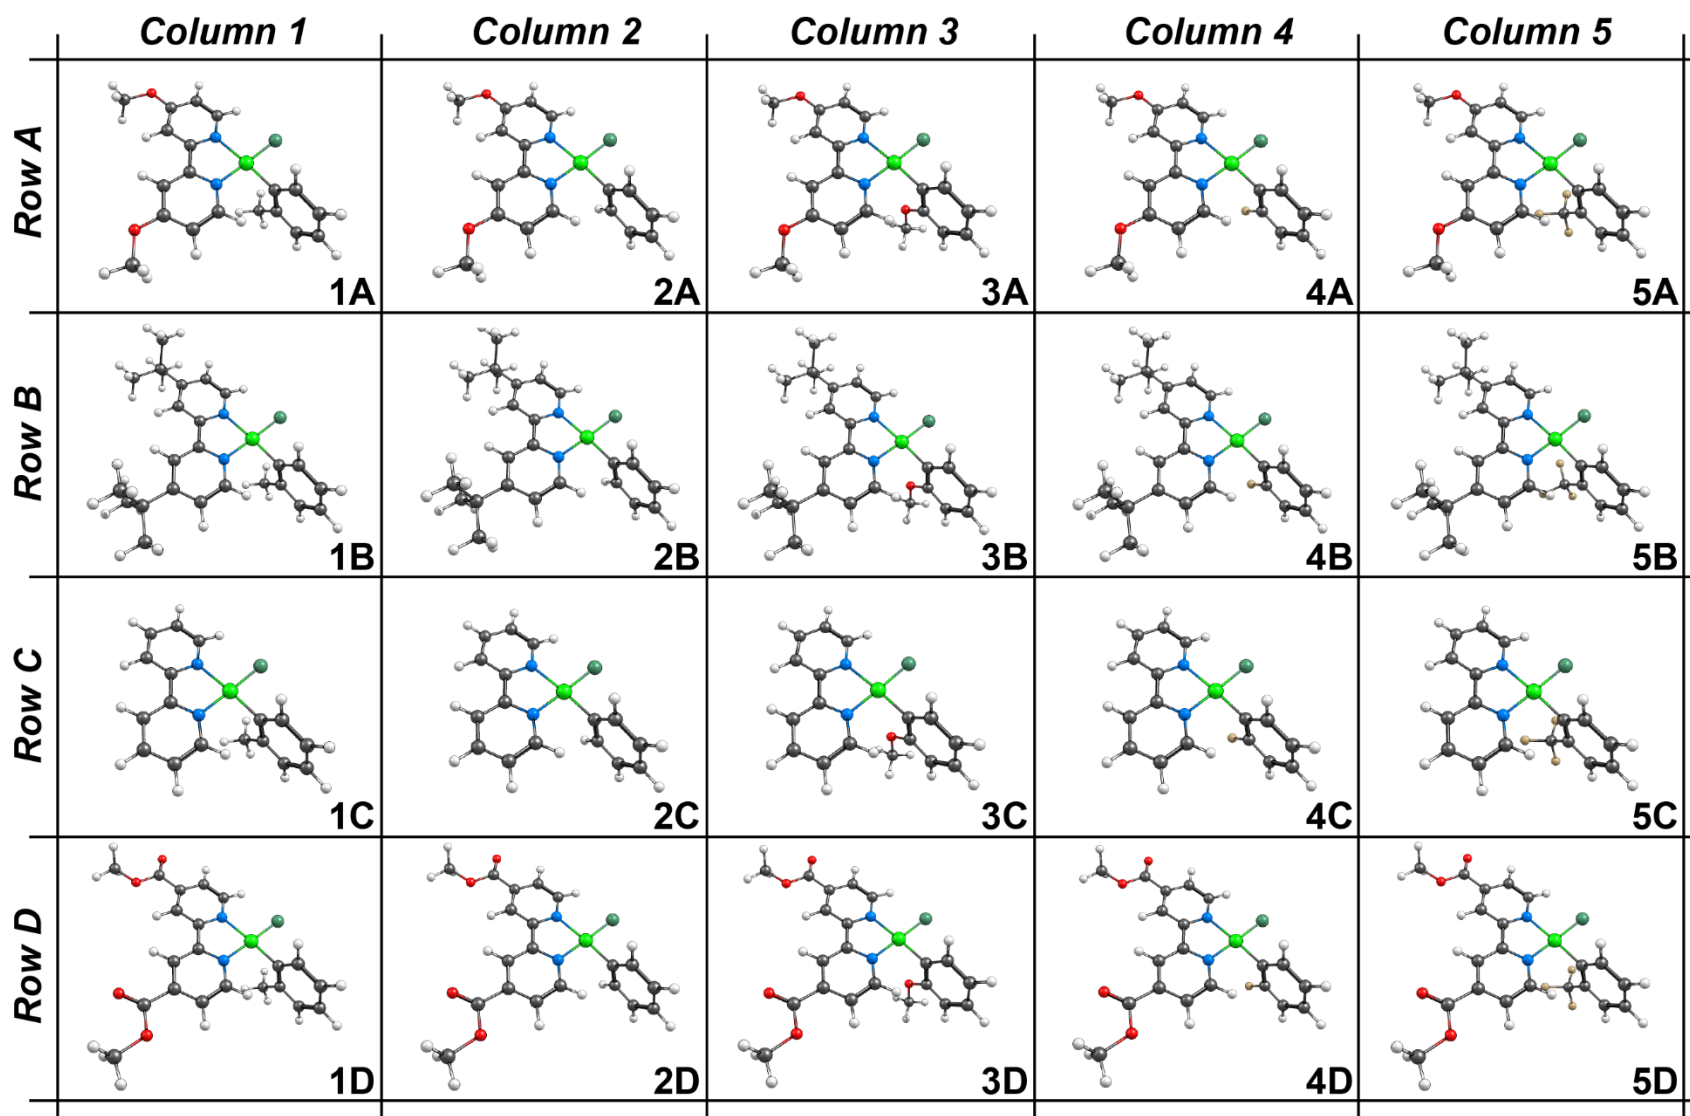

**Figure S55.** All DFT optimized structures ( $S = 0$ ) for the matrix of  $\text{Ni}(\text{R}^i\text{bpy})(\text{R}'\text{Ph})\text{Cl}$  ( $\text{R} = \text{CH}_3\text{O}$ ,  $t\text{-Bu}$ ,  $\text{H}$ ,  $\text{CH}_3\text{OOC}$ ;  $\text{R}' = \text{CH}_3$ ,  $\text{H}$ ,  $\text{OCH}_3$ ,  $\text{F}$ ,  $\text{CF}_3$ ) examined in this study.

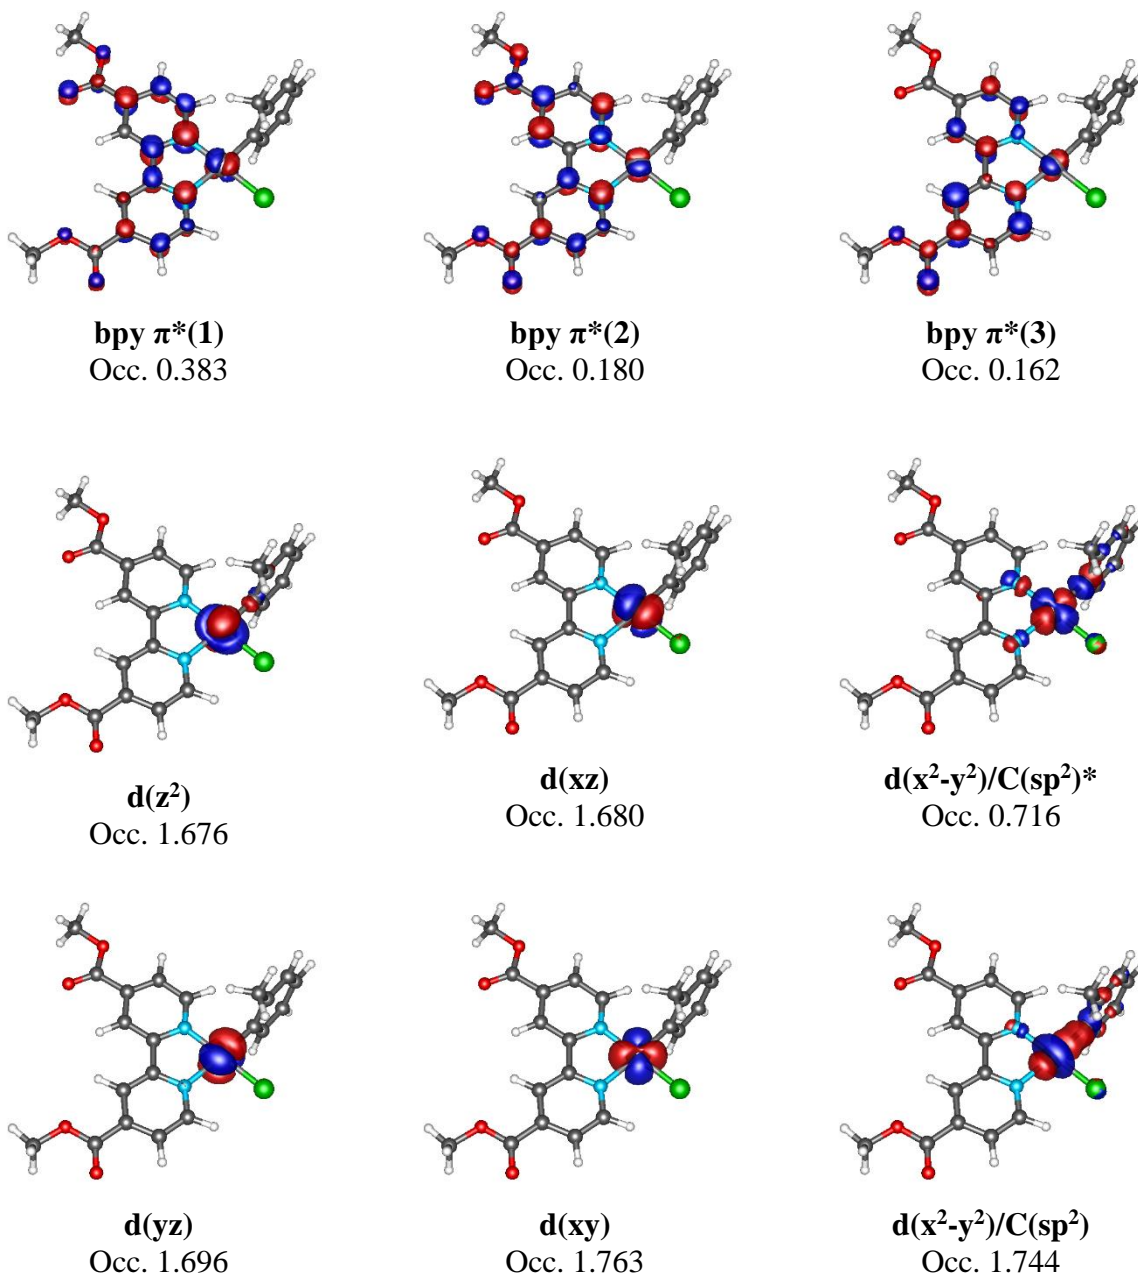

**Figure S56.** An example active space given for the **1D** complex, with x-axis along the Ni–halide bond and y-axis along the Ni–aryl bond. The CASSCF complete active space consists of 10 electrons in 9 orbitals (10e, 9o): Ni  $d(yz)$ ,  $d(z^2)$ ,  $d(xy)$ ,  $d(xz)$ , a pair of bonding and antibonding Ni  $d(x^2-y^2)$ /aryl  $C(sp^2)$  orbitals, and three bpy  $\pi^*$  orbitals.



## S2.2 Limitations of the Computational Methods.

### *Multireference methods*

The ground state wave functions of **1A–5D** exhibited a substantial multiconfigurational character. However, except for **1D**, the CASSCF/QD-NEVPT2 calculations predict only minor differences in the amount of closed-shell singlet (CSS) contribution in the configuration interaction (CI) vectors among the series of studied complexes, with the maximum CSS weight of ~60 % (Figure S57; *bottom*). This contrasts with the description at the CASSCF-only level, where the CSS contribution responds linearly to the Hammett parameters (Figure S57; *top*). Following the CASSCF trend, **1D** is predicted with the CSS weight of only 13 %, whereas the <sup>1</sup>MLCT [d(xz) → π\*(1)] becomes the dominant configuration in the ground state wave function (with the weight of ~51 %). We believe that such a different description of the CASSCF reference wave function eventually renders an incomplete description of **1D** at the CASSCF/QD-NEVPT2 level; exhibited, e.g., by a deviation of **1D** from the CASSCF/QD-NEVPT2 composition trend in Figure S57; *bottom*.

As discussed in the main text, there is also a significant discrepancy in the activation energies obtained with TD-DFT and CASSCF/QD-NEVPT2 for the same photolysis mechanism, i.e., exploiting the <sup>3</sup>(MLCT+LMCT) pathway. This is likely due to the higher Ni(II)–C BDEs predicted with CASSCF/QD-NEVPT2 (Table S6), raising the energies of the repulsive one-photon, two-electron excited-state surfaces. In this respect, we note that the calculated BDEs vary significantly with the amount of the exact exchange (Table S7); the BDE from S = 0 ground state decreases with increasing exchange (e.g., in **1B**, the BDE is ~54 kcal mol<sup>-1</sup> for pure BP86, ~48 kcal mol<sup>-1</sup> for BP86+10% of exact exchange, ~39 kcal mol<sup>-1</sup> for BP86+25%, and ~27 kcal mol<sup>-1</sup> for BP86+50%). Notably, the Hartree-Fock and CASSCF methods severely underestimate the BDE at ~10 kcal mol<sup>-1</sup> and ~5 kcal mol<sup>-1</sup> for **1A–5D**, respectively.

Further exhibited by the excessive corrections of the second-order perturbation theory (UHF/RI-SCS-MP2, CASSCF/QD-NEVPT2) and domain based local pair natural orbital coupled-cluster theory (UHF/DLPNO-CCSD(T)) (Table S7), we believe that description of the **1A–5D** complexes is rather incomplete at the UHF and CASSCF level. In particular, we note the absence of the <sup>3</sup>[d(x<sup>2</sup>-y<sup>2</sup>)/C(sp<sup>2</sup>) → d(x<sup>2</sup>-y<sup>2</sup>)/C(sp<sup>2</sup>)\*] state in the CASSCF calculation. This state is not observed even when increasing the number of triplet excited states present in the state-averaged CASSCF calculation to 100.

While this excited state is predicted at the TD-DFT level from the triplet state (*vide supra*) at ~80-90 kcal mol<sup>-1</sup> for **1A–5D** in their singlet equilibrium geometries, the excited state was not observed in the lowest 25 triplets in our CASSCF reference wave functions (accounting for the excited states within ~100 kcal mol<sup>-1</sup>). Note that the surface can be detected in CASSCF after excluding the bpy π\* orbitals in the state-averaged calculations with 15 singlets/15 triplets and the 10e, 6o active spaces (Table S8). However, the corresponding excited states are raised up to the energies of ~170-190 kcal mol<sup>-1</sup>, hence the absence in the calculations with 25 triplets/15 singlets and the 10e, 9o active spaces. In addition, the NEVPT2 and QD-NEVPT2 corrections predict an excited state energy for the <sup>3</sup>[d(x<sup>2</sup>-y<sup>2</sup>)/C(sp<sup>2</sup>) → d(x<sup>2</sup>-y<sup>2</sup>)/C(sp<sup>2</sup>)\*] transition of ~0.5-8 kcal mol<sup>-1</sup> and ~22-32 kcal mol<sup>-1</sup>, respectively, indicative of a rather deficient description at the CASSCF level. Finally, we note that the <sup>3</sup>[d(x<sup>2</sup>-y<sup>2</sup>)/C(sp<sup>2</sup>) → d(x<sup>2</sup>-y<sup>2</sup>)/C(sp<sup>2</sup>)\*] configuration decreases in the CI vectors of the lowest-lying singlet states along the Ni–C bond dissociation coordinates (Section S2.5), which is consistent with underestimated (CASSCF) or overestimated (CASSCF/NEVPT2 and CASSCF/QD-NEVPT2) BDEs as compared to the DFT methods.

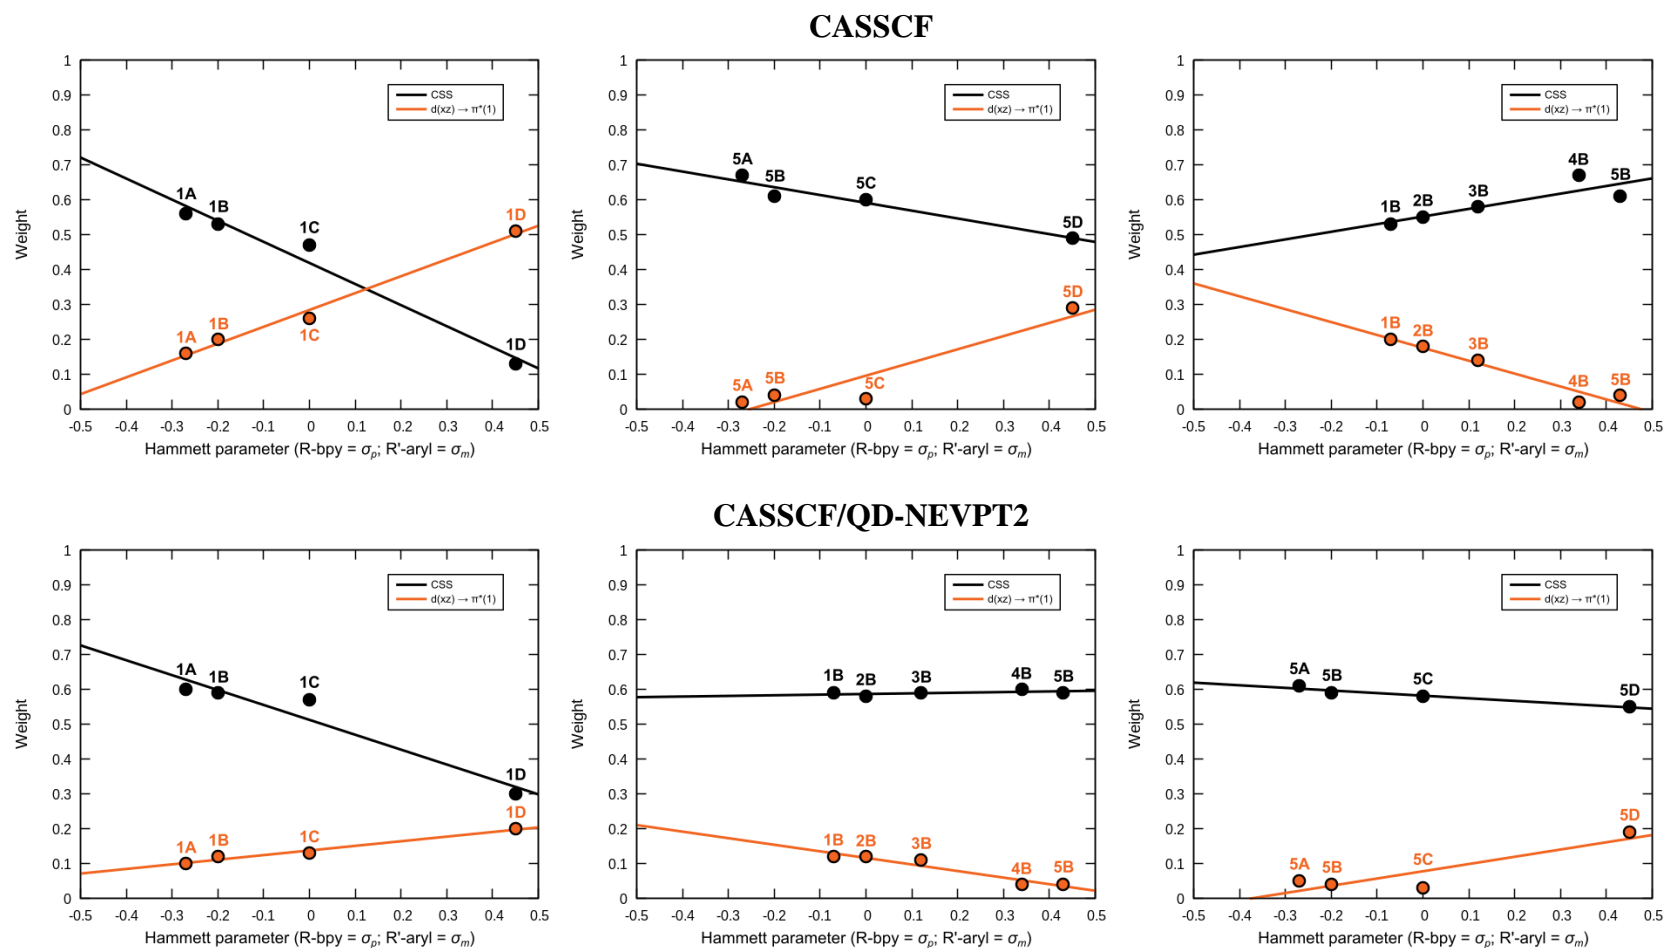

**Figure S57.** Hammett correlations for the weights of the closed-shell singlet (CSS) and Ni  $d(xz) \rightarrow bpy \pi^*(1)$  configurations in the lowest-energy singlet CI vectors of the equilibrium-geometry structures at the CASSCF (top) and CASSCF/QD-NEVPT2 (bottom) levels with the CPCM(THF) solvation model; 10e,9o Active Space – 25 triplet roots, 15 singlet roots.

**Table S6.** Difference in the BDEs for **1A–5D** and Ni(TMEDA)(CH<sub>3</sub>Ph)Cl complexes obtained at the DFT (B3LYP) and CASSCF/QD-NEVPT2 level. The BDEs are significantly increased with CASSCF/QD-NEVPT2 method. The energies are referenced to the energies of the singlet ground states at their equilibrium geometries.

| Compound                        | B3LYP | CASSCF/QD-NEVPT2 |
|---------------------------------|-------|------------------|
| 1A                              | 41.3  | 90.1             |
| 1B                              | 40.3  | 87.7             |
| 1C                              | 38.9  | 84.6             |
| 1D                              | 38.9  | 58.4             |
| 2A                              | 42.0  | ---              |
| 2B                              | 41.5  | 85.2             |
| 2C                              | 41.6  | ---              |
| 2D                              | 39.9  | ---              |
| 3A                              | 42.2  | ---              |
| 3B                              | 40.5  | 91.5             |
| 3C                              | 41.9  | ---              |
| 3D                              | 39.1  | ---              |
| 4A                              | 44.4  | ---              |
| 4B                              | 41.8  | 92.3             |
| 4C                              | 44.5  | ---              |
| 4D                              | 40.3  | ---              |
| 5A                              | 43.6  | 91.6             |
| 5B                              | 41.8  | 92.8             |
| 5C                              | 42.2  | 90.3             |
| 5D                              | 40.3  | 77.3             |
| Ni(TMEDA)(CH <sub>3</sub> Ph)Cl | 43.8  | 62.7             |

**Table S7.** Comparison of the BDEs for **1B** obtained using different methods. The BDE is demonstrated to be related to the amount of HF exchange. The energies are given in kcal mol<sup>-1</sup>

|          | BP86 | BP86<br>+10%HF | BP86<br>+25%HF | BP86<br>+50%HF | UHF  | CASSCF | SCS-MP2 | DLPNO-<br>CCSD(T) |
|----------|------|----------------|----------------|----------------|------|--------|---------|-------------------|
| 1B (S=0) | 53.7 | 48.0           | 39.2           | 27.2           | 12.3 | 3.1    | 52.3    | 52.8              |

**Table S8.** Energy of the <sup>3</sup>[d(x<sup>2</sup>-y<sup>2</sup>)/C(sp<sup>2</sup>) → d(x<sup>2</sup>-y<sup>2</sup>)/C(sp<sup>2</sup>)\*] excited state (in kcal mol<sup>-1</sup>) at different levels of theory.

| Compound | CASSCF | CASSCF/NEVPT2 | CASSCF/QD-NEVPT2 |
|----------|--------|---------------|------------------|
| 1A       | 175.5  | 3.5           | 28.7             |
| 1B       | 174.7  | 3.0           | 29.4             |
| 1C       | 173.2  | 2.7           | 30.3             |
| 1D       | 170.3  | 0.5           | 31.9             |
| 5A       | 189.2  | 5.7           | 22.0             |
| 5B       | 188.7  | 7.8           | 27.0             |
| 5C       | 186.5  | 6.8           | 27.1             |
| 5D       | 183.5  | 5.2           | 27.6             |

#### TD-DFT

A standard TD-DFT approach does not allow two-electron excitations. Therefore, it is not possible to inspect the ‘one-photon, two-electron’ triplet repulsive surfaces, denoted in the main text as <sup>3</sup>(MLCT+LMCT), from the singlet ground states. Additionally, the spin-forbidden one-electron

excitations to generate ‘one-photon, one-electron’ triplet excited-state surfaces (including, e.g., <sup>3</sup>LMCT proposed to be operative for Ni–TMEDA complexes) can be generated only via spin-flip transitions from the restricted Kohn-Sham orbitals. For that reason, we have also performed TD-DFT from the triplet excited states (at the singlet geometries) to complement the singlet TD-DFT computations of the conventional <sup>1</sup>MLCT bands.

Note that the lowest-energy triplet reference state has the electronic configuration described in Figure S58 with the singly-occupied d(z<sup>2</sup>) and d(x<sup>2</sup>-y<sup>2</sup>)/C(sp<sup>2</sup>)\* orbitals. This represents limitations to our computational model, since only one single-electron (spin-allowed; β-to-β) excitation can produce the two-electron <sup>3</sup>(MLCT+LMCT) repulsive surface, d(x<sup>2</sup>-y<sup>2</sup>)/C(sp<sup>2</sup>) → bpy π\*(1) (blue panel in Figure S58). This contrasts with the CASSCF/QD-NEVPT2 method, for which all four <sup>3</sup>(MLCT+LMCT) surfaces with different MLCT donor-orbital components are in principle attainable.

|                                                                                                                                                                                                                                                                                                                                                                        |                                                                                                                                                                                                                                                                                                                                                                           |                                                                                                                                                                                                                                                                                                                                                                        |                                                                                                                                                                                                                                                                                                                                                                           |
|------------------------------------------------------------------------------------------------------------------------------------------------------------------------------------------------------------------------------------------------------------------------------------------------------------------------------------------------------------------------|---------------------------------------------------------------------------------------------------------------------------------------------------------------------------------------------------------------------------------------------------------------------------------------------------------------------------------------------------------------------------|------------------------------------------------------------------------------------------------------------------------------------------------------------------------------------------------------------------------------------------------------------------------------------------------------------------------------------------------------------------------|---------------------------------------------------------------------------------------------------------------------------------------------------------------------------------------------------------------------------------------------------------------------------------------------------------------------------------------------------------------------------|
| $[d(x^2-y^2)/C(sp^2)] \uparrow \text{---}$<br>$bpy \pi^*(3) \text{---}$<br>$bpy \pi^*(2) \text{---}$<br>$bpy \pi^*(1) \text{---}$<br>$d(z^2) \uparrow \text{---}$<br>$d(xz) \uparrow \downarrow$<br>$d(yz) \uparrow \downarrow$<br>$d(xy) \uparrow \downarrow$<br>$[d(x^2-y^2)/C(sp^2)] \uparrow \downarrow$<br>$\alpha \quad \beta$<br><i>triplet reference state</i> | $[d(x^2-y^2)/C(sp^2)] \uparrow \text{---}$<br>$bpy \pi^*(3) \text{---}$<br>$bpy \pi^*(2) \text{---}$<br>$bpy \pi^*(1) \text{---}$<br>$d(z^2) \uparrow \downarrow$<br>$d(xz) \uparrow \downarrow$<br>$d(yz) \uparrow \downarrow$<br>$d(xy) \uparrow \downarrow$<br>$[d(x^2-y^2)/C(sp^2)] \uparrow \downarrow$<br>$\alpha \quad \beta$<br><i>‘one-photon, one-electron’</i> | $[d(x^2-y^2)/C(sp^2)] \uparrow \text{---}$<br>$bpy \pi^*(3) \text{---}$<br>$bpy \pi^*(2) \text{---}$<br>$bpy \pi^*(1) \text{---}$<br>$d(z^2) \uparrow \text{---}$<br>$d(xz) \uparrow \downarrow$<br>$d(yz) \uparrow \downarrow$<br>$d(xy) \uparrow \downarrow$<br>$[d(x^2-y^2)/C(sp^2)] \uparrow \downarrow$<br>$\alpha \quad \beta$<br><i>triplet reference state</i> | $[d(x^2-y^2)/C(sp^2)] \uparrow \text{---}$<br>$bpy \pi^*(3) \text{---}$<br>$bpy \pi^*(2) \text{---}$<br>$bpy \pi^*(1) \downarrow$<br>$d(z^2) \uparrow \text{---}$<br>$d(xz) \uparrow \downarrow$<br>$d(yz) \uparrow \downarrow$<br>$d(xy) \uparrow \downarrow$<br>$[d(x^2-y^2)/C(sp^2)] \uparrow \downarrow$<br>$\alpha \quad \beta$<br><i>‘one-photon, two-electron’</i> |
| <b>Triplet Repulsive Transitions</b>                                                                                                                                                                                                                                                                                                                                   |                                                                                                                                                                                                                                                                                                                                                                           | <b>TDDFT</b>                                                                                                                                                                                                                                                                                                                                                           | <b>CASSCF/QD-NEVPT2</b>                                                                                                                                                                                                                                                                                                                                                   |
| $d(x^2-y^2)/C(sp^2) \rightarrow d(x^2-y^2)/C(sp^2)^*$                                                                                                                                                                                                                                                                                                                  |                                                                                                                                                                                                                                                                                                                                                                           | ✓                                                                                                                                                                                                                                                                                                                                                                      | <i>not found</i>                                                                                                                                                                                                                                                                                                                                                          |
| $d(x^2-y^2)/C(sp^2) + d(z^2) \rightarrow d(x^2-y^2)/C(sp^2)^* + bpy \pi^*(1)$                                                                                                                                                                                                                                                                                          |                                                                                                                                                                                                                                                                                                                                                                           | ✓                                                                                                                                                                                                                                                                                                                                                                      | ✓                                                                                                                                                                                                                                                                                                                                                                         |
| $d(x^2-y^2)/C(sp^2) + d(xz) \rightarrow d(x^2-y^2)/C(sp^2)^* + bpy \pi^*(1)$                                                                                                                                                                                                                                                                                           |                                                                                                                                                                                                                                                                                                                                                                           | ✗                                                                                                                                                                                                                                                                                                                                                                      | ✓                                                                                                                                                                                                                                                                                                                                                                         |
| $d(x^2-y^2)/C(sp^2) + d(yz) \rightarrow d(x^2-y^2)/C(sp^2)^* + bpy \pi^*(1)$                                                                                                                                                                                                                                                                                           |                                                                                                                                                                                                                                                                                                                                                                           | ✗                                                                                                                                                                                                                                                                                                                                                                      | ✓                                                                                                                                                                                                                                                                                                                                                                         |
| $d(x^2-y^2)/C(sp^2) + d(xy) \rightarrow d(x^2-y^2)/C(sp^2)^* + bpy \pi^*(1)$                                                                                                                                                                                                                                                                                           |                                                                                                                                                                                                                                                                                                                                                                           | ✗                                                                                                                                                                                                                                                                                                                                                                      | ✓                                                                                                                                                                                                                                                                                                                                                                         |

**Figure S58.** The lowest-energy triplet reference state has the electronic configuration with the singly-occupied d(z<sup>2</sup>) and d(x<sup>2</sup>-y<sup>2</sup>)/C(sp<sup>2</sup>)\* orbitals. Using the TD-DFT from the triplet reference, two energetically accessible triplet repulsive excited-state surfaces can be described: <sup>3</sup>LMCT surface (d(x<sup>2</sup>-y<sup>2</sup>)/C(sp<sup>2</sup>) → d(x<sup>2</sup>-y<sup>2</sup>)/C(sp<sup>2</sup>)\* and <sup>3</sup>(MLCT+LMCT) surface (d(x<sup>2</sup>-y<sup>2</sup>)/C(sp<sup>2</sup>) + d(z<sup>2</sup>) → d(x<sup>2</sup>-y<sup>2</sup>)/C(sp<sup>2</sup>)\* + bpy π\*(1)). In contrast, four different <sup>3</sup>(MLCT+LMCT) triplet repulsive surfaces can be obtained using the CASSCF/QD-NEVPT2 method. However, due to deficiencies in the CASSCF reference wave function (as described above), the <sup>3</sup>LMCT surface cannot be identified.

Overall, the TD-DFT and CASSCF/QD-NEVPT2 trends are relatively consistent. However, both of the methods are assumed to be more reliable at the equilibrium geometries, which is exhibited by their good correlations with the experimental UV/Vis absorption spectra and Hammett parameters and calculated activation energies vs. the experimental rates of Ni–C homolysis. Since the multiconfigurational character of **1A–5D** complexes increases by moving from the equilibrium geometry, the deficient CASSCF reference wave functions appear to be less reliable. Similarly, the multiconfigurational nature and the large spin-population build-up at the near-dissociation limit present complications for the single-determinant TD-DFT method.

### S2.3 Ground-State Calculated Properties

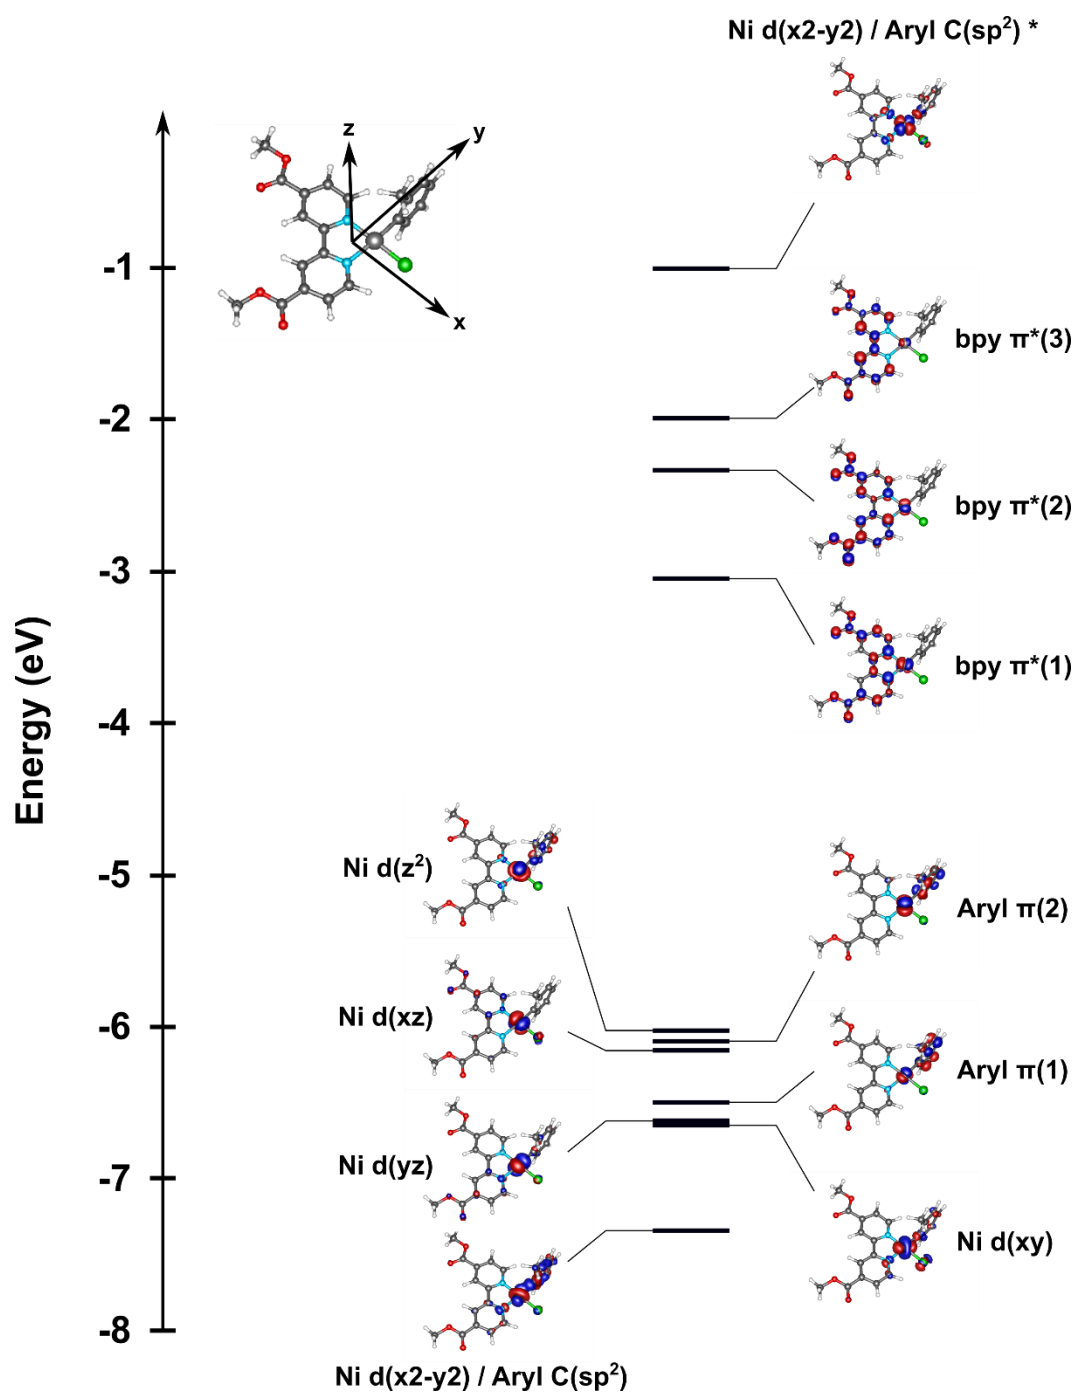

**Figure S59.** An example molecular orbital diagram given for the **1D** complex at the DFT level, with x-axis along the Ni–halide bond and y-axis along the Ni–aryl bond.

Columns:

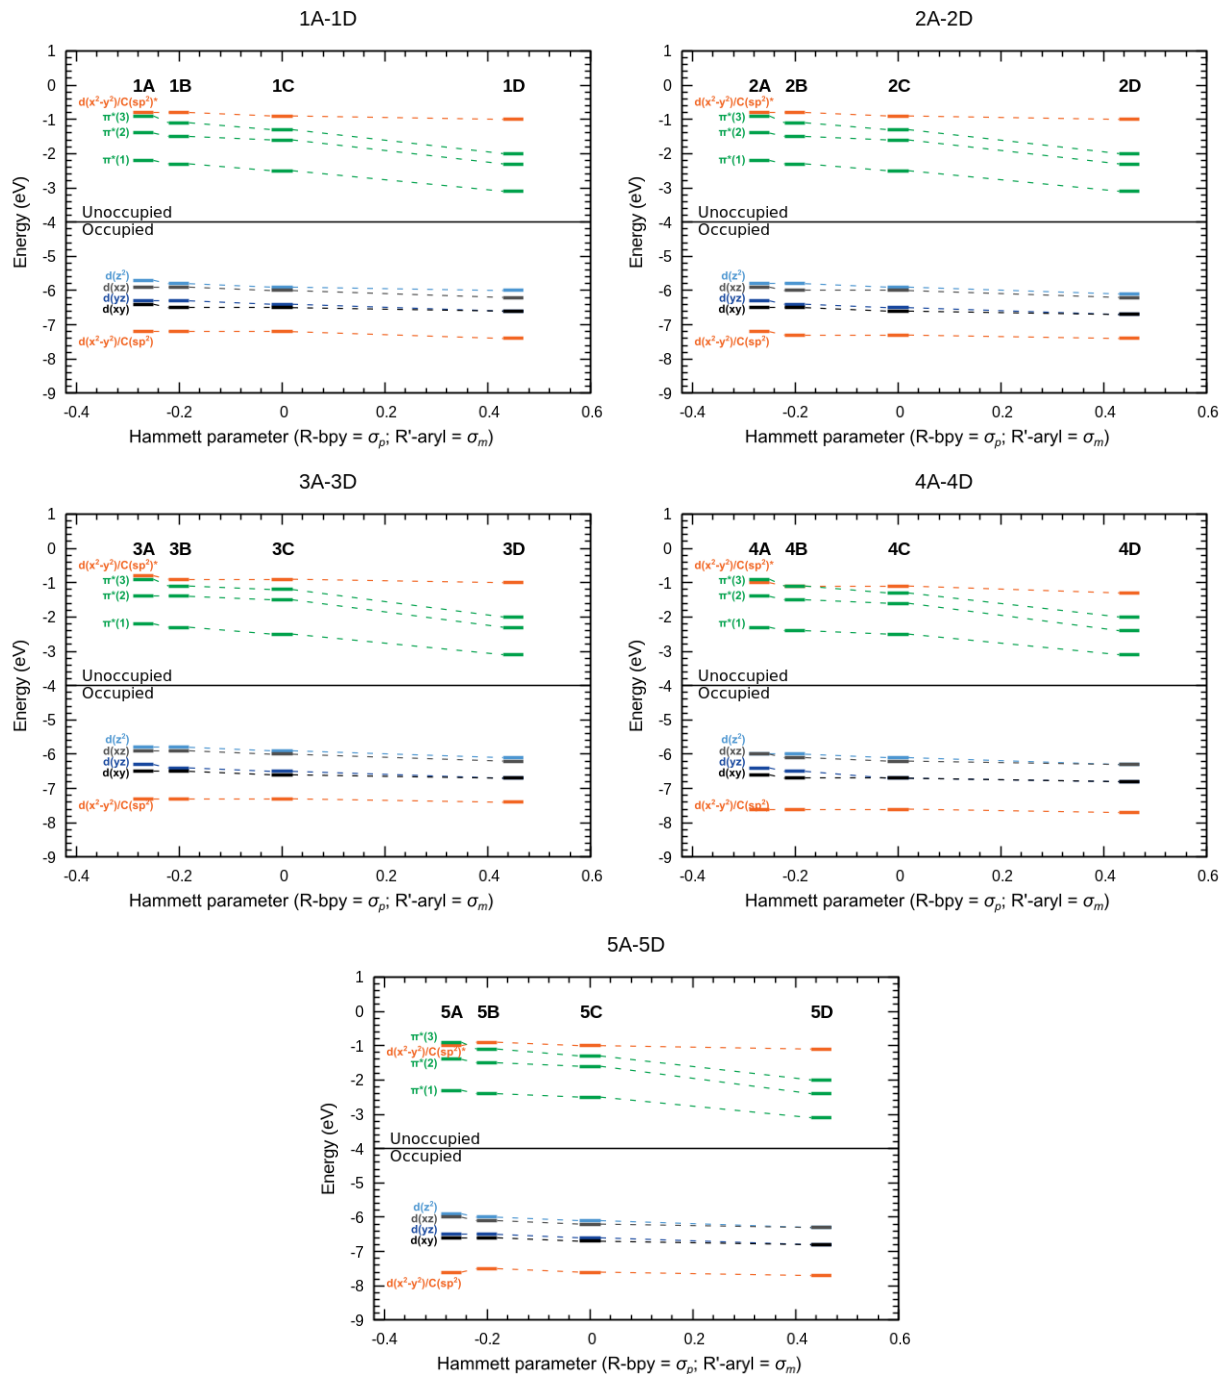

**Figure S60.** Comparison of the ground-state orbital energies for **1A-5D**, **1B-Br**, and Ni(TMEDA)(CH<sub>3</sub>Ph)Cl complexes in their equilibrium geometries at the DFT (B3LYP) level with the CPCM(THF) solvation model.

Rows:

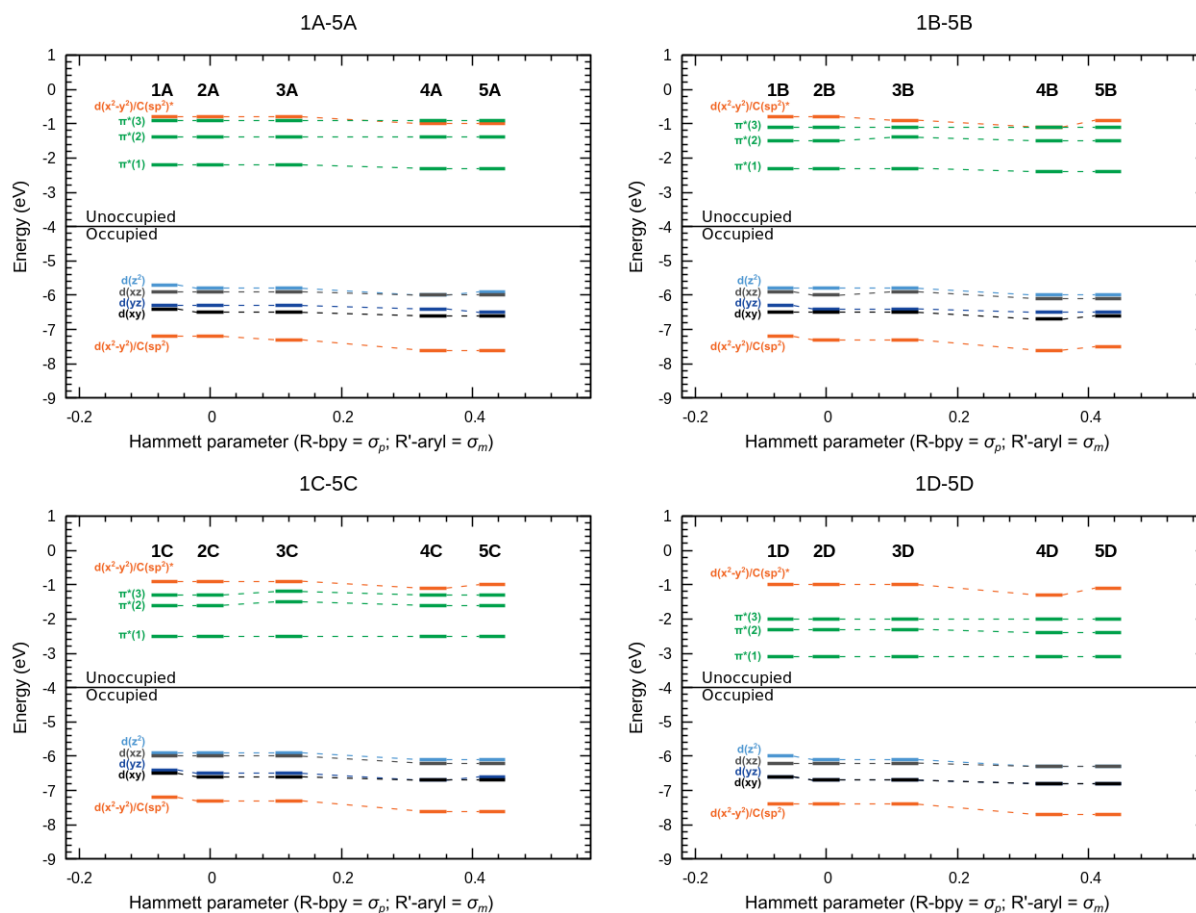

1B-Br and Ni(II)TMEDA:

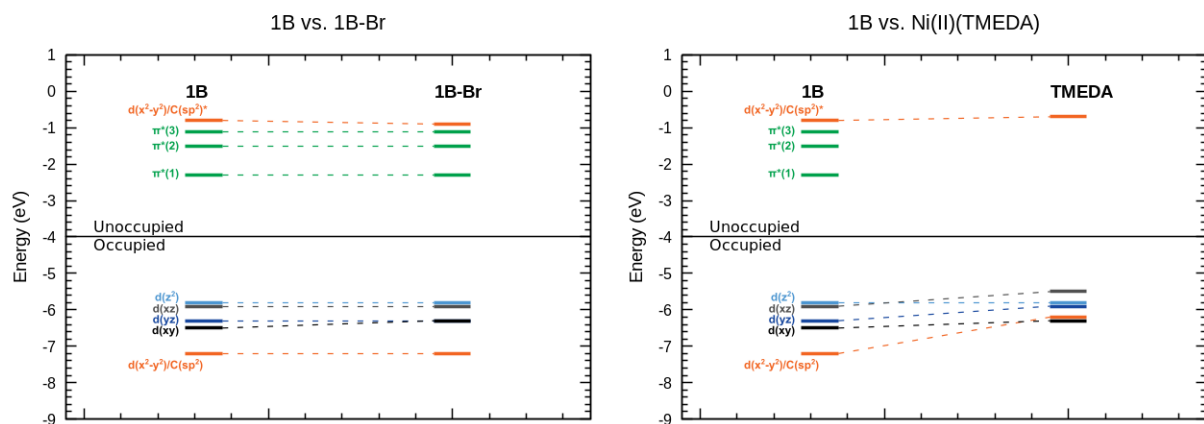

**Figure S60, cont.** Comparison of the ground-state orbital energies for **1A-5D**, **1B-Br**, and Ni(TMEDA)(CH<sub>3</sub>Ph)Cl complexes in their equilibrium geometries at the DFT (B3LYP) level with the CPCM(THF) solvation model.

**Table S9.** Covalency of the low-spin  $d(x^2-y^2)$  ground states of **1A–5D** at the DFT (left) and CASSCF/QD-NEVPT2 (right) level. States with weights > 1% were included in the sum.

| Compound  | Ni character (%) | bpy character (%) | CSS (%) | Sum of all MLCT states (%) | Sum of all d-d states (%) | Sum of mixed MLCT + d-d states (%) |
|-----------|------------------|-------------------|---------|----------------------------|---------------------------|------------------------------------|
| <b>1A</b> | 53               | 12                | 60      | 16                         | 17                        | 1                                  |
| <b>1B</b> | 53               | 11                | 59      | 18                         | 16                        | 2                                  |
| <b>1C</b> | 52               | 11                | 57      | 20                         | 15                        | 2                                  |
| <b>1D</b> | 53               | 11                | 30      | 47                         | 8                         | 5                                  |
| <b>2A</b> | 53               | 12                | ---     | ---                        | ---                       | ---                                |
| <b>2B</b> | 53               | 11                | 58      | 19                         | 16                        | 2                                  |
| <b>2C</b> | 53               | 11                | ---     | ---                        | ---                       | ---                                |
| <b>2D</b> | 53               | 11                | ---     | ---                        | ---                       | ---                                |
| <b>3A</b> | 47               | 20                | ---     | ---                        | ---                       | ---                                |
| <b>3B</b> | 53               | 11                | 59      | 18                         | 15                        | 1                                  |
| <b>3C</b> | 53               | 12                | ---     | ---                        | ---                       | ---                                |
| <b>3D</b> | 53               | 11                | ---     | ---                        | ---                       | ---                                |
| <b>4A</b> | 54               | 12                | ---     | ---                        | ---                       | ---                                |
| <b>4B</b> | 54               | 12                | 60      | 18                         | 14                        | 1                                  |
| <b>4C</b> | 54               | 12                | ---     | ---                        | ---                       | ---                                |
| <b>4D</b> | 54               | 11                | ---     | ---                        | ---                       | ---                                |
| <b>5A</b> | 53               | 13                | 61      | 15                         | 18                        | 0                                  |
| <b>5B</b> | 51               | 13                | 59      | 18                         | 15                        | 0                                  |
| <b>5C</b> | 53               | 12                | 58      | 20                         | 13                        | 1                                  |
| <b>5D</b> | 53               | 12                | 55      | 24                         | 11                        | 1                                  |



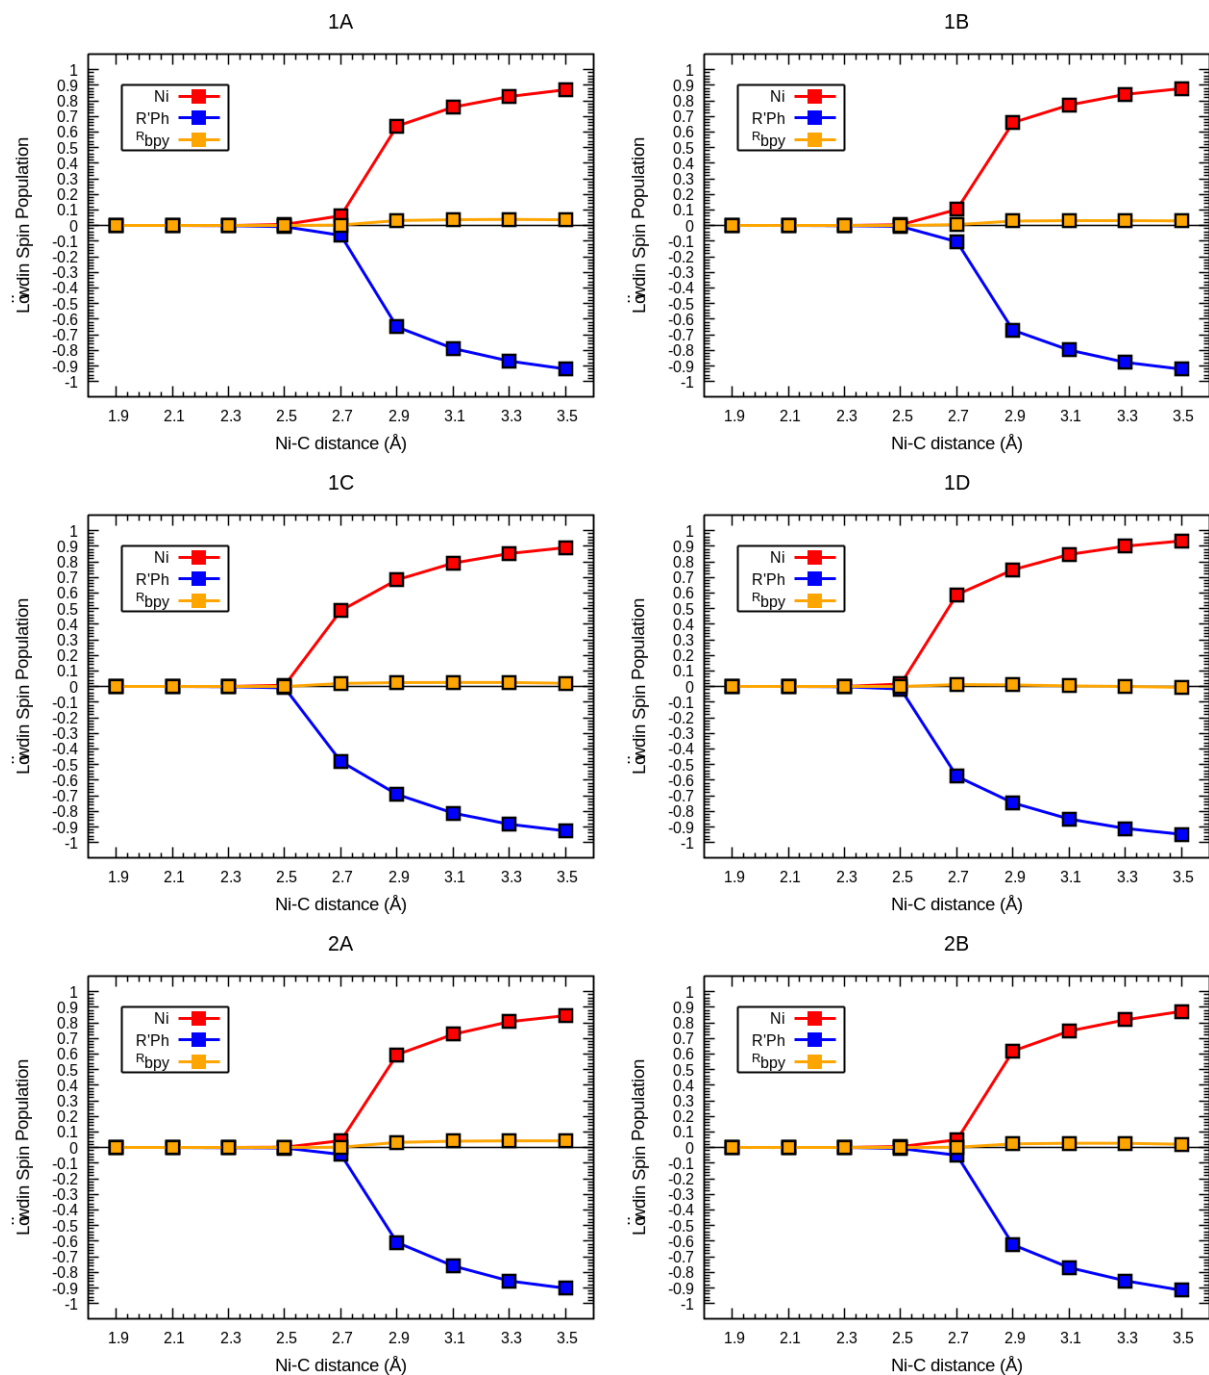

**Figure S61.** Evolution of the Löwdin spin populations for the BSS singlet state along the Ni-C bond dissociation coordinate at the DFT (B3LYP) level with the CPCM(THF) solvation model.

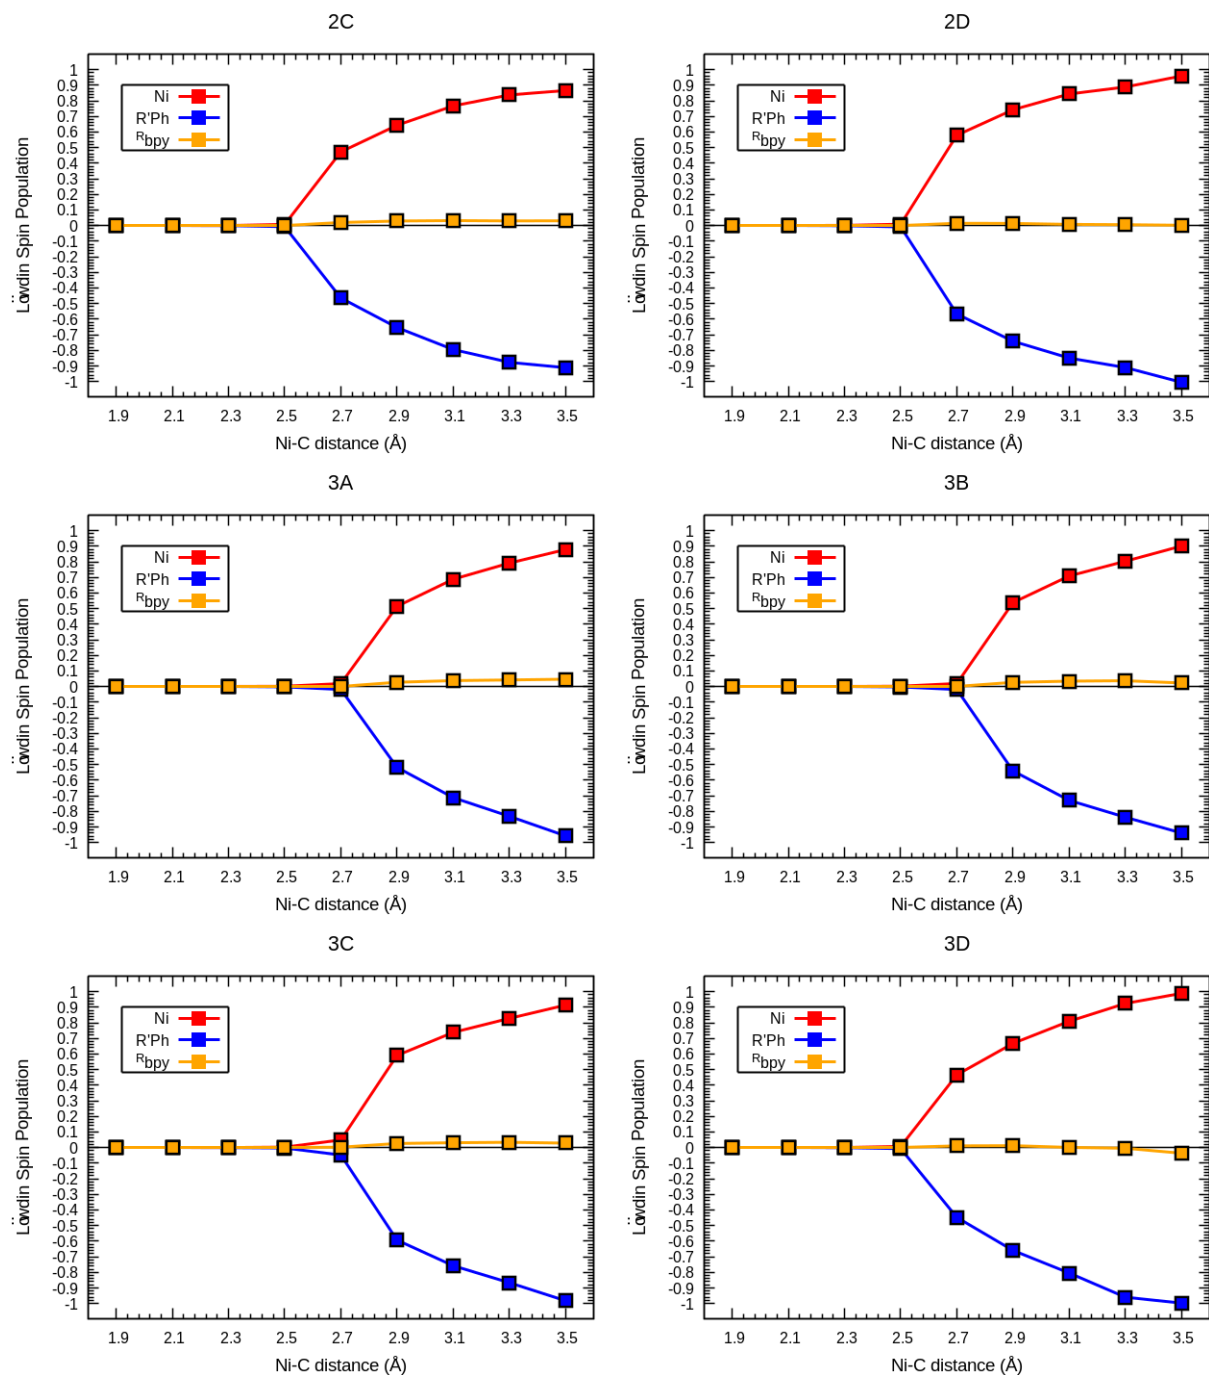

**Figure S61, cont.** Evolution of the Löwdin spin populations for the BSS singlet state along the Ni-C bond dissociation coordinate at the DFT (B3LYP) level with the CPCM(THF) solvation model.

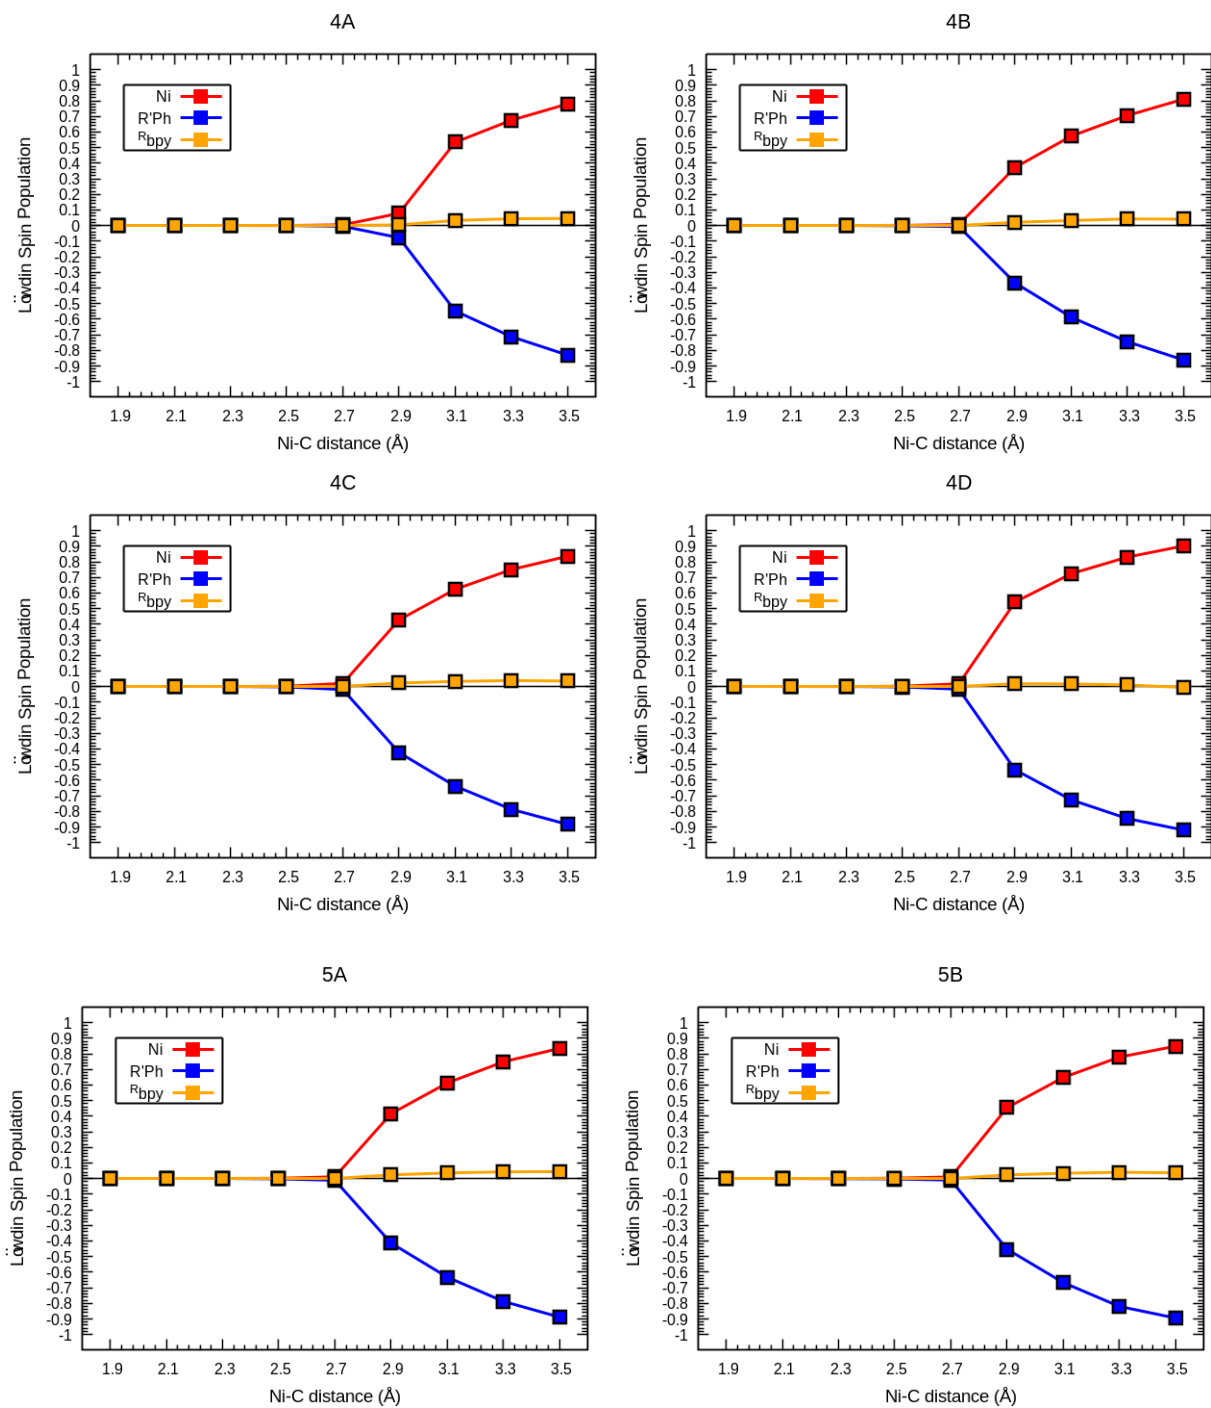

**Figure S61, cont.** Evolution of the Löwdin spin populations for the BSS singlet state along the Ni-C bond dissociation coordinate at the DFT (B3LYP) level with the CPCM(THF) solvation model.

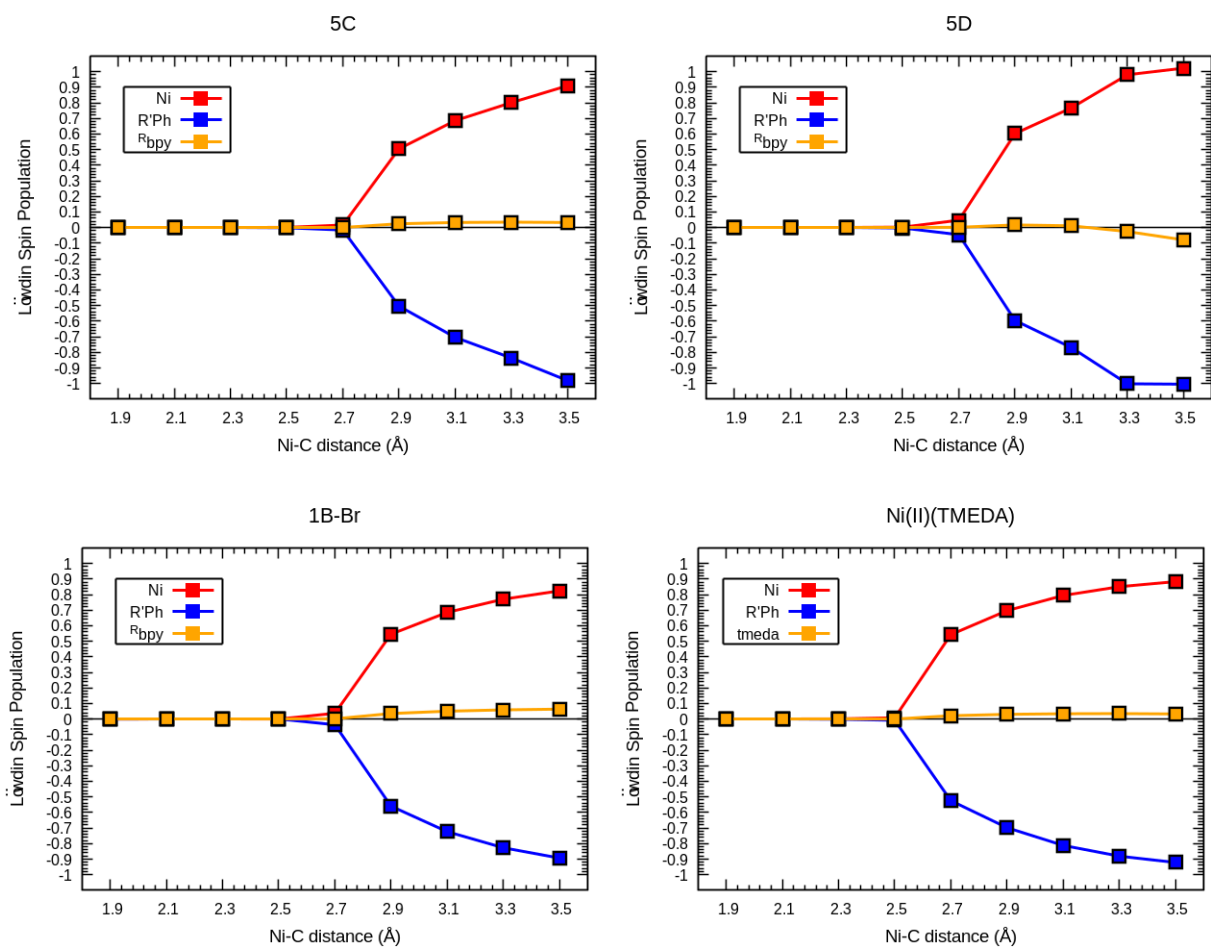

**Figure S61, cont.** Evolution of the Löwdin spin populations for the BSS singlet state along the Ni–C bond dissociation coordinate at the DFT (B3LYP) level with the CPCM(THF) solvation model.

## S2.4 Excited-State Calculated Properties.

**Table S10.** Comparison of selected excited-states energies (kcal mol<sup>-1</sup>) for **1A-5D**, **1B-Br**, and Ni(TMEDA)(CH<sub>3</sub>Ph)Cl (abbreviated as Ni-TMEDA) complexes in their equilibrium geometries at the TD-DFT (UKS; B3LYP) level with the CPCM(THF) solvation model.

| Transition                                                                                                                                           | 1A    | 1B    | 1C    | 1D   | 2B    | 3B    | 4B    | 5A    | 5B    | 5C    | 5D    | 1B-Br | Ni-TMEDA |
|------------------------------------------------------------------------------------------------------------------------------------------------------|-------|-------|-------|------|-------|-------|-------|-------|-------|-------|-------|-------|----------|
| <b>S = 0</b>                                                                                                                                         |       |       |       |      |       |       |       |       |       |       |       |       |          |
| d(x <sup>2</sup> -y <sup>2</sup> )/C(sp <sup>2</sup> ) → d(x <sup>2</sup> -y <sup>2</sup> )/C(sp <sup>2</sup> )*                                     | ---   | ---   | ---   | ---  | ---   | ---   | ---   | ---   | ---   | ---   | 99.7  | ---   | ---      |
| d(x <sup>2</sup> -y <sup>2</sup> )/C(sp <sup>2</sup> ) → π*(1)                                                                                       | 85.5  | 84.9  | 82.0  | 71.2 | 84.8  | 88.0  | 95.4  | 97.1  | 92.4  | 89.1  | 79.4  | 85.0  | ---      |
| d(x <sup>2</sup> -y <sup>2</sup> )/C(sp <sup>2</sup> ) → π*(2)                                                                                       | 106.1 | 105.3 | 108.5 | 89.9 | 106.5 | 109.5 | 115.6 | 119.7 | 114.2 | 113.0 | 97.3  | 105.6 | ---      |
| d(yz) → d(x <sup>2</sup> -y <sup>2</sup> )/C(sp <sup>2</sup> )*                                                                                      | 62.3  | 62.9  | 63.1  | 63.7 | 63.1  | 61.8  | 60.7  | 60.3  | 64.1  | 64.5  | 63.5  | 61.6  | 60.1     |
| d(yz) → π*(1)                                                                                                                                        | 62.1  | 61.4  | 64.1  | 49.5 | 62.0  | 62.6  | 69.4  | 67.0  | 64.5  | 62.9  | 53.5  | 61.7  | ---      |
| d(yz) → π*(2)                                                                                                                                        | 84.3  | 86.2  | 83.8  | 72.9 | 86.9  | 86.1  | 90.7  | 89.1  | 91.9  | 89.3  | 79.0  | 85.6  | ---      |
| d(xy) → d(x <sup>2</sup> -y <sup>2</sup> )/C(sp <sup>2</sup> )*                                                                                      | ---   | 62.6  | 62.7  | 63.0 | 63.2  | 60.9  | 61.4  | 61.6  | 65.4  | 65.1  | 66.8  | 61.2  | 58.8     |
| d(xy) → π*(1)                                                                                                                                        | 65.6  | 64.4  | 61.4  | 51.3 | 65.4  | 65.0  | 67.0  | 69.8  | 68.4  | 66.5  | 55.5  | 61.6  | ---      |
| d(xy) → π*(2)                                                                                                                                        | 86.2  | 85.2  | 84.1  | 69.5 | 85.3  | ---   | 85.8  | 95.2  | 89.7  | 88.6  | 76.4  | 82.6  | ---      |
| d(z <sup>2</sup> ) → d(x <sup>2</sup> -y <sup>2</sup> )/C(sp <sup>2</sup> )*                                                                         | 56.0  | 56.2  | 55.9  | 60.5 | 56.7  | 54.7  | 54.7  | 54.3  | 57.2  | 56.3  | 62.1  | 54.9  | 53.7     |
| d(z <sup>2</sup> ) → π*(1)                                                                                                                           | 48.2  | 47.5  | 44.9  | 37.5 | 47.6  | 48.1  | 51.4  | 53.0  | 51.5  | 49.3  | 40.6  | 48.0  | ---      |
| d(z <sup>2</sup> ) → π*(2)                                                                                                                           | 69.3  | 69.0  | 68.6  | 55.0 | 69.0  | 69.7  | 72.8  | 74.1  | 73.8  | 73.5  | 61.1  | 69.5  | ---      |
| d(xz) → d(x <sup>2</sup> -y <sup>2</sup> )/C(sp <sup>2</sup> )*                                                                                      | 57.2  | 58.2  | 58.9  | 60.4 | 57.7  | 56.2  | 56.2  | 55.5  | 58.8  | 59.3  | 60.8  | 55.9  | 55.9     |
| d(xz) → π*(1)                                                                                                                                        | 52.6  | 51.7  | 48.8  | 38.9 | 51.9  | 52.5  | 55.3  | 56.6  | 54.9  | 52.3  | 42.7  | 51.5  | ---      |
| d(xz) → π*(2)                                                                                                                                        | 78.8  | 77.9  | 72.3  | 64.1 | 73.3  | 78.8  | 81.4  | 82.3  | 82.2  | 80.1  | 62.9  | 77.0  | ---      |
| <b>S = 1</b>                                                                                                                                         |       |       |       |      |       |       |       |       |       |       |       |       |          |
| d(z <sup>2</sup> ) → d(x <sup>2</sup> -y <sup>2</sup> )/C(sp <sup>2</sup> )*                                                                         | 31.5  | 32.1  | 32.5  | 33.6 | 32.4  | 29.9  | 29.5  | 28.9  | 32.4  | 33.0  | 34.7  | 31.2  | 29.3     |
| d(x <sup>2</sup> -y <sup>2</sup> )/C(sp <sup>2</sup> ) → d(x <sup>2</sup> -y <sup>2</sup> )/C(sp <sup>2</sup> )*                                     | 83.7  | 83.5  | 83.4  | 83.0 | 85.9  | 77.7  | 84.3  | 89.3  | 91.8  | 90.5  | 91.7  | 82.2  | 69.3     |
| [d(x <sup>2</sup> -y <sup>2</sup> )/C(sp <sup>2</sup> ) + d(z <sup>2</sup> )]<br>→ [π*(1) + d(x <sup>2</sup> -y <sup>2</sup> )/C(sp <sup>2</sup> )*] | 109.1 | 108.2 | 105.1 | 96.9 | 108.3 | 109.5 | 119.1 | 120.0 | 116.5 | 112.5 | 105.0 | 107.0 | ---      |
| d(z <sup>2</sup> ) → π*(1)                                                                                                                           | 41.4  | 40.6  | 37.7  | 27.8 | 40.9  | 41.7  | 45.4  | 47.1  | 45.6  | 43.1  | 34.6  | 40.2  | ---      |
| d(z <sup>2</sup> ) → π*(2)                                                                                                                           | 61.9  | 61.3  | 60.2  | 45.7 | 61.7  | 62.5  | 66.3  | 67.8  | 67.0  | 66.2  | 52.4  | 60.9  | ---      |

**Table S10, cont.** Comparison of selected excited-states energies (nm) for **1A-5D**, **1B-Br**, and Ni(TMEDA)(CH<sub>3</sub>Ph)Cl (abbreviated as Ni-TMEDA) complexes in their equilibrium geometries at the TD-DFT (UKS; B3LYP) level with the CPCM(THF) solvation model.

| Transition                                                                         | 1A  | 1B  | 1C  | 1D   | 2B  | 3B  | 4B  | 5A  | 5B  | 5C  | 5D  | 1B-Br | Ni-TMEDA |
|------------------------------------------------------------------------------------|-----|-----|-----|------|-----|-----|-----|-----|-----|-----|-----|-------|----------|
| <b>S = 0</b>                                                                       |     |     |     |      |     |     |     |     |     |     |     |       |          |
| $d(x^2-y^2)/C(sp^2) \rightarrow d(x^2-y^2)/C(sp^2)^*$                              | --- | --- | --- | ---  | --- | --- | --- | --- | --- | --- | 287 | ---   | ---      |
| $d(x^2-y^2)/C(sp^2) \rightarrow \pi^*(1)$                                          | 334 | 337 | 349 | 402  | 337 | 325 | 300 | 294 | 309 | 321 | 360 | 336   | ---      |
| $d(x^2-y^2)/C(sp^2) \rightarrow \pi^*(2)$                                          | 269 | 272 | 264 | 318  | 268 | 261 | 247 | 239 | 250 | 253 | 294 | 271   | ---      |
| $d(yz) \rightarrow d(x^2-y^2)/C(sp^2)^*$                                           | 459 | 455 | 453 | 449  | 453 | 463 | 471 | 474 | 446 | 443 | 450 | 464   | 476      |
| $d(yz) \rightarrow \pi^*(1)$                                                       | 460 | 466 | 446 | 578  | 461 | 457 | 412 | 427 | 443 | 455 | 534 | 463   | ---      |
| $d(yz) \rightarrow \pi^*(2)$                                                       | 339 | 332 | 341 | 392  | 329 | 332 | 315 | 321 | 311 | 320 | 362 | 334   | ---      |
| $d(xy) \rightarrow d(x^2-y^2)/C(sp^2)^*$                                           | --- | 457 | 456 | 454  | 452 | 469 | 466 | 464 | 437 | 439 | 428 | 467   | 486      |
| $d(xy) \rightarrow \pi^*(1)$                                                       | 436 | 444 | 466 | 557  | 437 | 440 | 427 | 410 | 418 | 430 | 515 | 464   | ---      |
| $d(xy) \rightarrow \pi^*(2)$                                                       | 332 | 336 | 340 | 411  | 335 | --- | 333 | 300 | 319 | 323 | 374 | 346   | ---      |
| $d(z^2) \rightarrow d(x^2-y^2)/C(sp^2)^*$                                          | 511 | 509 | 511 | 473  | 504 | 523 | 523 | 527 | 500 | 508 | 460 | 521   | 532      |
| $d(z^2) \rightarrow \pi^*(1)$                                                      | 593 | 602 | 637 | 762  | 601 | 594 | 556 | 539 | 555 | 580 | 704 | 596   | ---      |
| $d(z^2) \rightarrow \pi^*(2)$                                                      | 413 | 414 | 417 | 520  | 414 | 410 | 393 | 386 | 387 | 389 | 468 | 411   | ---      |
| $d(xz) \rightarrow d(x^2-y^2)/C(sp^2)^*$                                           | 500 | 491 | 485 | 473  | 496 | 509 | 509 | 515 | 486 | 482 | 470 | 511   | 511      |
| $d(xz) \rightarrow \pi^*(1)$                                                       | 544 | 553 | 586 | 735  | 551 | 545 | 517 | 505 | 521 | 547 | 670 | 555   | ---      |
| $d(xz) \rightarrow \pi^*(2)$                                                       | 363 | 367 | 395 | 446  | 390 | 363 | 351 | 347 | 348 | 357 | 455 | 371   | ---      |
| <b>S = 1</b>                                                                       |     |     |     |      |     |     |     |     |     |     |     |       |          |
| $d(z^2) \rightarrow d(x^2-y^2)/C(sp^2)^*$                                          | 908 | 891 | 880 | 851  | 882 | 956 | 969 | 989 | 882 | 866 | 824 | 916   | 976      |
| $d(x^2-y^2)/C(sp^2) \rightarrow d(x^2-y^2)/C(sp^2)^*$                              | 342 | 342 | 343 | 344  | 333 | 368 | 339 | 320 | 311 | 316 | 312 | 348   | 413      |
| $[d(x^2-y^2)/C(sp^2) + d(z^2)]$<br>$\rightarrow [\pi^*(1) + d(x^2-y^2)/C(sp^2)^*]$ | 262 | 264 | 272 | 295  | 264 | 261 | 240 | 238 | 245 | 254 | 272 | 267   | ---      |
| $d(z^2) \rightarrow \pi^*(1)$                                                      | 691 | 704 | 758 | 1028 | 699 | 686 | 630 | 607 | 627 | 663 | 826 | 711   | ---      |
| $d(z^2) \rightarrow \pi^*(2)$                                                      | 462 | 466 | 475 | 626  | 463 | 457 | 431 | 422 | 427 | 432 | 546 | 469   | ---      |

**Table S11.** Comparison of selected excited-states energies (kcal mol<sup>-1</sup>) for **1A-5D**, **1B-Br**, and Ni(TMEDA)(CH<sub>3</sub>Ph)Cl (abbreviated as Ni-TMEDA) complexes in their equilibrium geometries at the CASSCF/QD-NEVPT2 level with the CPCM(THF) solvation model; 10e,9o Active Space – 25 triplet roots, 15 singlet roots. For a complete list of excited state energies refer to Section 2.5, Additional Calculated Properties.

| Transition                                                                                                                                           | 1A    | 1B    | 1C    | 1D   | 2B    | 3B    | 4B   | 5A    | 5B    | 5C    | 5D    | 1B-Br | Ni-TMEDA |
|------------------------------------------------------------------------------------------------------------------------------------------------------|-------|-------|-------|------|-------|-------|------|-------|-------|-------|-------|-------|----------|
| <b>S = 0</b>                                                                                                                                         |       |       |       |      |       |       |      |       |       |       |       |       |          |
| d(yz) → d(x <sup>2</sup> -y <sup>2</sup> )/C(sp <sup>2</sup> )*                                                                                      | 68.0  | 67.5  | 65.2  | ---  | 69.2  | 70.7  | 66.1 | 65.0  | 75.0  | 67.3  | 70.9  | 67.6  | 63.3     |
| d(yz) → π*(1)                                                                                                                                        | 52.8  | 52.1  | 48.7  | 40.3 | 52.2  | 54.2  | 50.3 | 52.9  | 55.3  | 53.8  | 41.4  | 51.1  | ---      |
| d(yz) → π*(2)                                                                                                                                        | 76.9  | 76.4  | 75.9  | 57.5 | 76.0  | 77.4  | 73.8 | 74.3  | 77.9  | ---   | 69.7  | 75.1  | ---      |
| d(xy) → d(x <sup>2</sup> -y <sup>2</sup> )/C(sp <sup>2</sup> )*                                                                                      | 62.5  | 65.1  | 65.9  | ---  | 66.0  | 64.2  | 69.1 | 67.6  | 68.2  | 68.0  | ---   | 63.7  | 62.1     |
| d(xy) → π*(1)                                                                                                                                        | 62.8  | 63.4  | 62.0  | 48.0 | 62.0  | 60.3  | 58.4 | 71.6  | 60.1  | 59.4  | 59.0  | 61.1  | ---      |
| d(xy) → π*(2)                                                                                                                                        | 90.9  | 90.3  | ---   | 71.5 | 90.5  | 91.9  | ---  | ---   | 93.5  | ---   | ---   | 89.5  | ---      |
| d(z <sup>2</sup> ) → d(x <sup>2</sup> -y <sup>2</sup> )/C(sp <sup>2</sup> )*                                                                         | 65.0  | 61.7  | 61.7  | ---  | 71.4  | 61.0  | 65.3 | 63.2  | 67.4  | 74.8  | 68.7  | 60.2  | 59.2     |
| d(z <sup>2</sup> ) → π*(1)                                                                                                                           | 43.5  | 42.6  | 39.9  | 23.0 | 42.0  | 43.2  | 39.7 | 38.8  | ---   | 47.1  | 35.4  | 41.3  | ---      |
| d(z <sup>2</sup> ) → π*(2)                                                                                                                           | 60.6  | 65.6  | 64.7  | 46.1 | 60.2  | 66.6  | 63.4 | ---   | 73.5  | 73.4  | 59.4  | 64.3  | ---      |
| d(xz) → d(x <sup>2</sup> -y <sup>2</sup> )/C(sp <sup>2</sup> )*                                                                                      | 64.0  | 62.6  | 62.7  | ---  | 63.8  | 63.5  | ---  | 59.5  | 63.6  | 63.8  | 67.5  | 62.6  | 57.6     |
| d(xz) → π*(1)                                                                                                                                        | 47.7  | 47.6  | 45.0  | 30.4 | 47.1  | 48.3  | 41.3 | 44.4  | 43.1  | 41.9  | ---   | 46.6  | ---      |
| d(xz) → π*(2)                                                                                                                                        | 71.2  | 61.7  | 61.7  | 51.2 | 64.0  | 72.7  | 71.7 | 73.1  | 67.0  | 67.8  | 60.3  | 69.7  | ---      |
| <b>S = 1</b>                                                                                                                                         |       |       |       |      |       |       |      |       |       |       |       |       |          |
| d(yz) → d(x <sup>2</sup> -y <sup>2</sup> )/C(sp <sup>2</sup> )*                                                                                      | 33.3  | 34.2  | 33.4  | 16.1 | 34.8  | 33.8  | 34.0 | 31.3  | 36.4  | 37.1  | 33.5  | 34.0  | 35.3     |
| d(yz) → π*(1)                                                                                                                                        | 52.9  | 52.2  | 48.9  | 34.1 | 51.6  | 52.8  | 48.4 | 51.3  | 52.2  | 51.2  | 44.9  | 50.7  | ---      |
| d(yz) → π*(2)                                                                                                                                        | 75.9  | 76.1  | 75.1  | 58.4 | 75.7  | 76.9  | 72.9 | 74.0  | 75.8  | 70.5  | 69.5  | 74.5  | ---      |
| d(xy) → d(x <sup>2</sup> -y <sup>2</sup> )/C(sp <sup>2</sup> )*                                                                                      | 42.3  | 43.3  | 44.2  | 55.6 | 45.5  | 42.2  | 43.0 | 41.4  | 45.3  | 46.2  | 47.9  | 45.6  | 22.5     |
| d(xy) → π*(1)                                                                                                                                        | 67.7  | 66.9  | 64.4  | 48.1 | 66.6  | 65.8  | 64.5 | 67.2  | 68.6  | 66.0  | 61.1  | 65.7  | ---      |
| d(xy) → π*(2)                                                                                                                                        | 90.6  | 88.9  | ---   | 72.2 | 89.9  | 91.5  | 88.5 | 89.2  | 92.3  | 93.1  | 86.2  | 89.0  | ---      |
| d(z <sup>2</sup> ) → d(x <sup>2</sup> -y <sup>2</sup> )/C(sp <sup>2</sup> )*                                                                         | 26.6  | 27.4  | 26.4  | 10.6 | 27.9  | 26.5  | 27.2 | 25.1  | 32.9  | 33.4  | 29.3  | 27.2  | 19.8     |
| d(z <sup>2</sup> ) → π*(1)                                                                                                                           | 42.8  | 41.7  | 38.9  | 22.2 | 41.0  | 42.4  | 38.7 | 41.9  | 46.2  | ---   | ---   | 40.4  | ---      |
| d(z <sup>2</sup> ) → π*(2)                                                                                                                           | 62.8  | 65.3  | ---   | 46.6 | 62.7  | 66.3  | 63.1 | 64.2  | 69.8  | 76.8  | 59.3  | 63.8  | ---      |
| d(xz) → d(x <sup>2</sup> -y <sup>2</sup> )/C(sp <sup>2</sup> )*                                                                                      | 30.5  | 31.4  | 30.8  | 7.1  | 31.9  | 30.7  | 30.5 | 28.1  | 28.9  | 29.5  | 34.1  | 31.4  | 15.6     |
| d(xz) → π*(1)                                                                                                                                        | 46.0  | 44.9  | 42.4  | 25.9 | 42.2  | 45.9  | 42.2 | 45.0  | 42.3  | 41.1  | ---   | 40.8  | ---      |
| d(xz) → π*(2)                                                                                                                                        | 67.7  | 68.0  | 67.7  | 50.0 | 67.6  | 69.3  | 66.1 | 66.7  | 66.7  | 67.2  | 62.7  | 67.1  | ---      |
| [d(x <sup>2</sup> -y <sup>2</sup> )/C(sp <sup>2</sup> ) + d(yz)]<br>→ [π*(1) + d(x <sup>2</sup> -y <sup>2</sup> )/C(sp <sup>2</sup> )*]              | ---   | 110.5 | 109.4 | 87.8 | 110.6 | 114.7 | ---  | 119.6 | 121.6 | 120.1 | ---   | 108.4 | ---      |
| [d(x <sup>2</sup> -y <sup>2</sup> )/C(sp <sup>2</sup> ) + d(xy)]<br>→ [π*(1) + d(x <sup>2</sup> -y <sup>2</sup> )/C(sp <sup>2</sup> )*]              | ---   | ---   | ---   | 82.6 | ---   | ---   | ---  | ---   | ---   | ---   | ---   | ---   | ---      |
| [d(x <sup>2</sup> -y <sup>2</sup> )/C(sp <sup>2</sup> ) + d(z <sup>2</sup> )]<br>→ [π*(1) + d(x <sup>2</sup> -y <sup>2</sup> )/C(sp <sup>2</sup> )*] | 120.0 | 120.7 | 115.9 | 95.0 | 120.3 | 123.1 | ---  | ---   | ---   | ---   | 119.4 | 116.7 | ---      |
| [d(x <sup>2</sup> -y <sup>2</sup> )/C(sp <sup>2</sup> ) + d(xz)]<br>→ [π*(1) + d(x <sup>2</sup> -y <sup>2</sup> )/C(sp <sup>2</sup> )*]              | 117.4 | 117.3 | 114.7 | ---  | 117.4 | 119.4 | ---  | ---   | ---   | ---   | 116.5 | 115.3 | ---      |

**Table S11, cont.** Comparison of selected excited-states energies (nm) for **1A-5D**, **1B-Br**, and Ni(TMEDA)(CH<sub>3</sub>Ph)Cl (abbreviated as Ni-TMEDA) complexes in their equilibrium geometries at the CASSCF/QD-NEVPT2 level with the CPCM(THF) solvation model; 10e,9o Active Space – 25 triplet roots, 15 singlet roots. For a complete list of excited state energies refer to Section 2.5, Additional Calculated Properties.

| Transition                                                                                                                                           | 1A   | 1B   | 1C   | 1D   | 2B   | 3B   | 4B   | 5A   | 5B  | 5C  | 5D  | 1B-Br | Ni-TMEDA |
|------------------------------------------------------------------------------------------------------------------------------------------------------|------|------|------|------|------|------|------|------|-----|-----|-----|-------|----------|
| <b>S = 0</b>                                                                                                                                         |      |      |      |      |      |      |      |      |     |     |     |       |          |
| d(yz) → d(x <sup>2</sup> -y <sup>2</sup> )/C(sp <sup>2</sup> )*                                                                                      | 420  | 424  | 439  | ---  | 413  | 404  | 433  | 440  | 381 | 425 | 403 | 423   | 452      |
| d(yz) → π*(1)                                                                                                                                        | 542  | 549  | 587  | 709  | 548  | 528  | 568  | 540  | 517 | 531 | 691 | 560   | ---      |
| d(yz) → π*(2)                                                                                                                                        | 372  | 374  | 377  | 497  | 376  | 369  | 387  | 385  | 367 | --- | 410 | 381   | ---      |
| d(xy) → d(x <sup>2</sup> -y <sup>2</sup> )/C(sp <sup>2</sup> )*                                                                                      | 457  | 439  | 434  | ---  | 433  | 445  | 414  | 423  | 419 | 420 | --- | 449   | 460      |
| d(xy) → π*(1)                                                                                                                                        | 455  | 451  | 461  | 596  | 461  | 474  | 490  | 399  | 476 | 481 | 485 | 468   | ---      |
| d(xy) → π*(2)                                                                                                                                        | 315  | 317  | ---  | 400  | 316  | 311  | ---  | ---  | 306 | --- | --- | 319   | ---      |
| d(z <sup>2</sup> ) → d(x <sup>2</sup> -y <sup>2</sup> )/C(sp <sup>2</sup> )*                                                                         | 440  | 463  | 463  | ---  | 400  | 469  | 438  | 452  | 424 | 382 | 416 | 475   | 483      |
| d(z <sup>2</sup> ) → π*(1)                                                                                                                           | 657  | 671  | 717  | 1243 | 681  | 662  | 720  | 737  | --- | 607 | 808 | 692   | ---      |
| d(z <sup>2</sup> ) → π*(2)                                                                                                                           | 472  | 436  | 442  | 620  | 475  | 429  | 451  | ---  | 389 | 390 | 481 | 445   | ---      |
| d(xz) → d(x <sup>2</sup> -y <sup>2</sup> )/C(sp <sup>2</sup> )*                                                                                      | 447  | 457  | 456  | ---  | 448  | 450  | ---  | 481  | 450 | 448 | 424 | 457   | 496      |
| d(xz) → π*(1)                                                                                                                                        | 599  | 601  | 635  | 941  | 607  | 592  | 692  | 644  | 663 | 682 | --- | 614   | ---      |
| d(xz) → π*(2)                                                                                                                                        | 402  | 463  | 463  | 558  | 447  | 393  | 399  | 391  | 427 | 422 | 474 | 410   | ---      |
| <b>S = 1</b>                                                                                                                                         |      |      |      |      |      |      |      |      |     |     |     |       |          |
| d(yz) → d(x <sup>2</sup> -y <sup>2</sup> )/C(sp <sup>2</sup> )*                                                                                      | 859  | 836  | 856  | 1776 | 822  | 846  | 841  | 913  | 785 | 771 | 853 | 841   | 810      |
| d(yz) → π*(1)                                                                                                                                        | 540  | 548  | 585  | 838  | 554  | 542  | 591  | 557  | 548 | 558 | 637 | 564   | ---      |
| d(yz) → π*(2)                                                                                                                                        | 377  | 376  | 381  | 490  | 378  | 372  | 392  | 386  | 377 | 406 | 411 | 384   | ---      |
| d(xy) → d(x <sup>2</sup> -y <sup>2</sup> )/C(sp <sup>2</sup> )*                                                                                      | 676  | 660  | 647  | 514  | 628  | 678  | 665  | 691  | 631 | 619 | 597 | 627   | 1271     |
| d(xy) → π*(1)                                                                                                                                        | 422  | 427  | 444  | 594  | 429  | 435  | 443  | 425  | 417 | 433 | 468 | 435   | ---      |
| d(xy) → π*(2)                                                                                                                                        | 316  | 322  | ---  | 396  | 318  | 312  | 323  | 321  | 310 | 307 | 332 | 321   | ---      |
| d(z <sup>2</sup> ) → d(x <sup>2</sup> -y <sup>2</sup> )/C(sp <sup>2</sup> )*                                                                         | 1075 | 1043 | 1083 | 2697 | 1025 | 1079 | 1051 | 1139 | 869 | 856 | 976 | 1051  | 1444     |
| d(z <sup>2</sup> ) → π*(1)                                                                                                                           | 668  | 686  | 735  | 1288 | 697  | 674  | 739  | 682  | 619 | --- | --- | 708   | ---      |
| d(z <sup>2</sup> ) → π*(2)                                                                                                                           | 455  | 438  | ---  | 614  | 456  | 431  | 453  | 445  | 410 | 372 | 482 | 448   | ---      |
| d(xz) → d(x <sup>2</sup> -y <sup>2</sup> )/C(sp <sup>2</sup> )*                                                                                      | 937  | 911  | 928  | 4027 | 896  | 931  | 937  | 1017 | 989 | 969 | 838 | 911   | 1833     |
| d(xz) → π*(1)                                                                                                                                        | 622  | 637  | 674  | 1104 | 678  | 623  | 678  | 635  | 676 | 696 | --- | 701   | ---      |
| d(xz) → π*(2)                                                                                                                                        | 422  | 420  | 422  | 572  | 423  | 413  | 433  | 429  | 429 | 425 | 456 | 426   | ---      |
| [d(x <sup>2</sup> -y <sup>2</sup> )/C(sp <sup>2</sup> ) + d(yz)]<br>→ [π*(1) + d(x <sup>2</sup> -y <sup>2</sup> )/C(sp <sup>2</sup> )*]              | ---  | 259  | 261  | 326  | 259  | 249  | ---  | 239  | 235 | 238 | --- | 264   | ---      |
| [d(x <sup>2</sup> -y <sup>2</sup> )/C(sp <sup>2</sup> ) + d(xy)]<br>→ [π*(1) + d(x <sup>2</sup> -y <sup>2</sup> )/C(sp <sup>2</sup> )*]              | ---  | ---  | ---  | 346  | ---  | ---  | ---  | ---  | --- | --- | --- | ---   | ---      |
| [d(x <sup>2</sup> -y <sup>2</sup> )/C(sp <sup>2</sup> ) + d(z <sup>2</sup> )]<br>→ [π*(1) + d(x <sup>2</sup> -y <sup>2</sup> )/C(sp <sup>2</sup> )*] | 238  | 237  | 247  | 301  | 238  | 232  | ---  | ---  | --- | --- | 239 | 245   | ---      |
| [d(x <sup>2</sup> -y <sup>2</sup> )/C(sp <sup>2</sup> ) + d(xz)]<br>→ [π*(1) + d(x <sup>2</sup> -y <sup>2</sup> )/C(sp <sup>2</sup> )*]              | 244  | 244  | 249  | ---  | 244  | 239  | ---  | ---  | --- | --- | 245 | 248   | ---      |



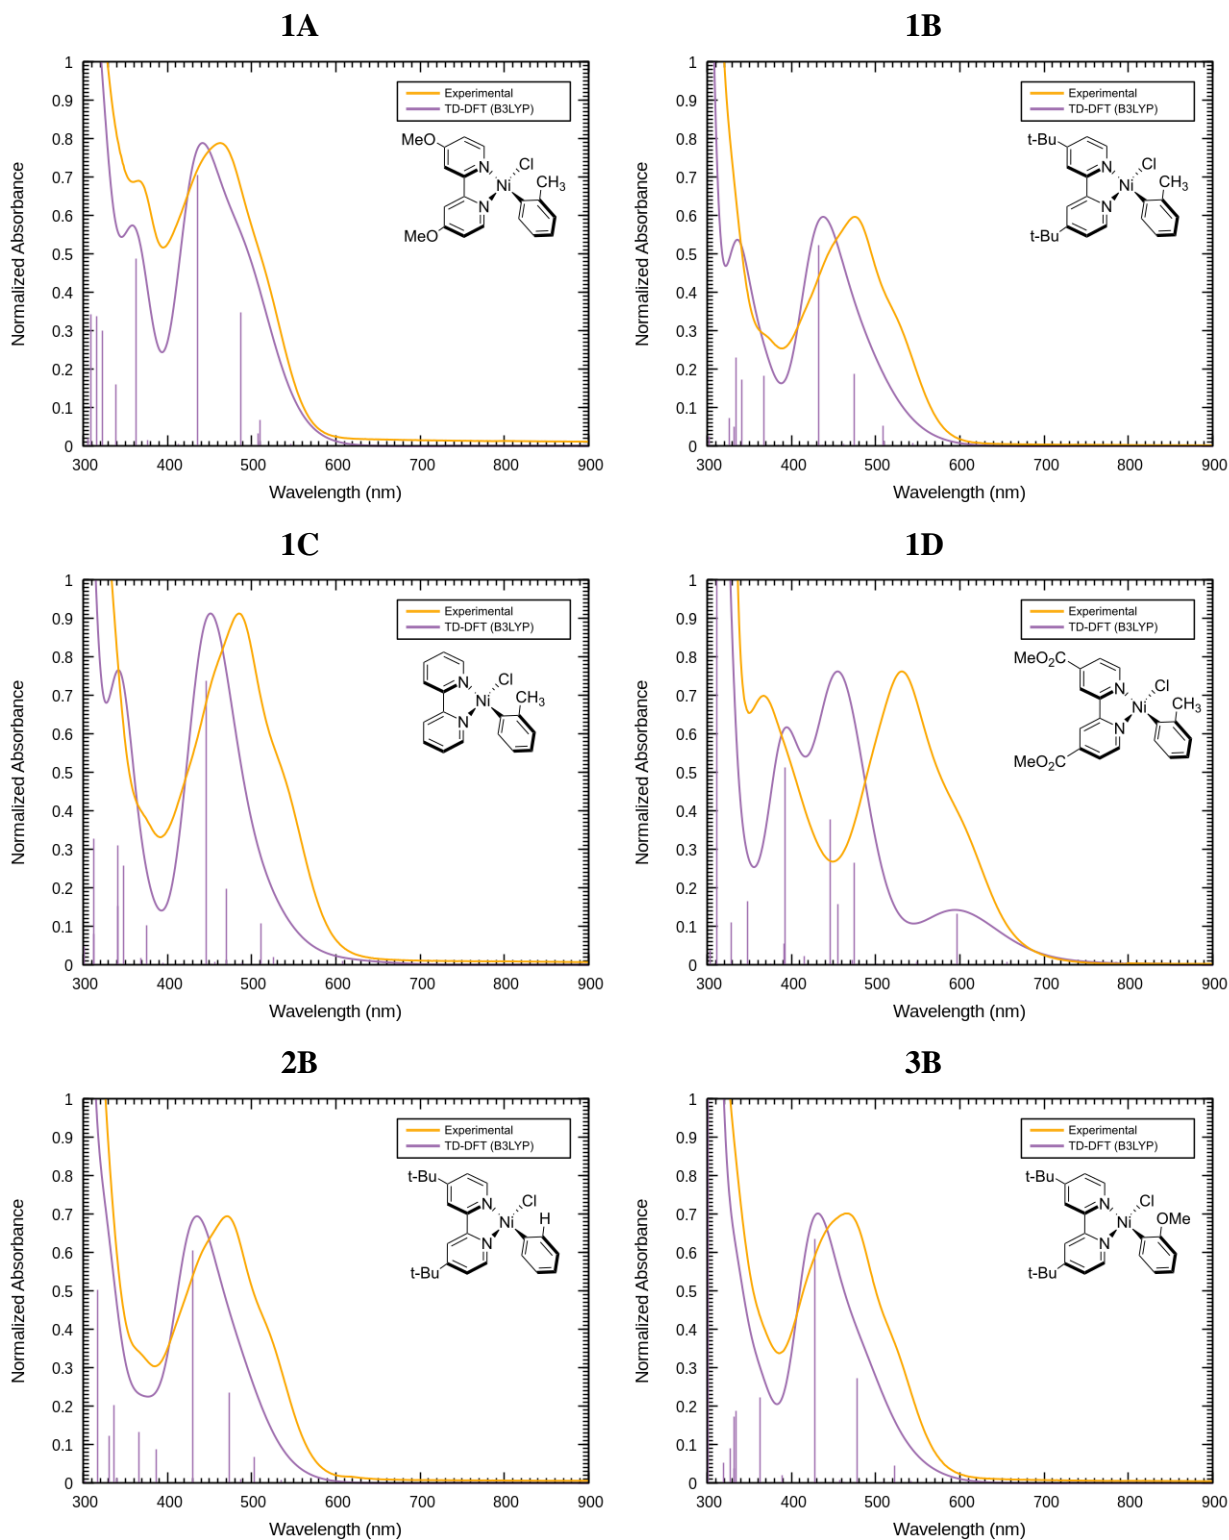

**Figure S62.** Overlay of the experimental (THF) (orange) and calculated (purple) UV-vis spectra for the equilibrium structures of **1A–5D** at the TD-DFT (B3LYP) level with the CPCM(THF) solvation model.

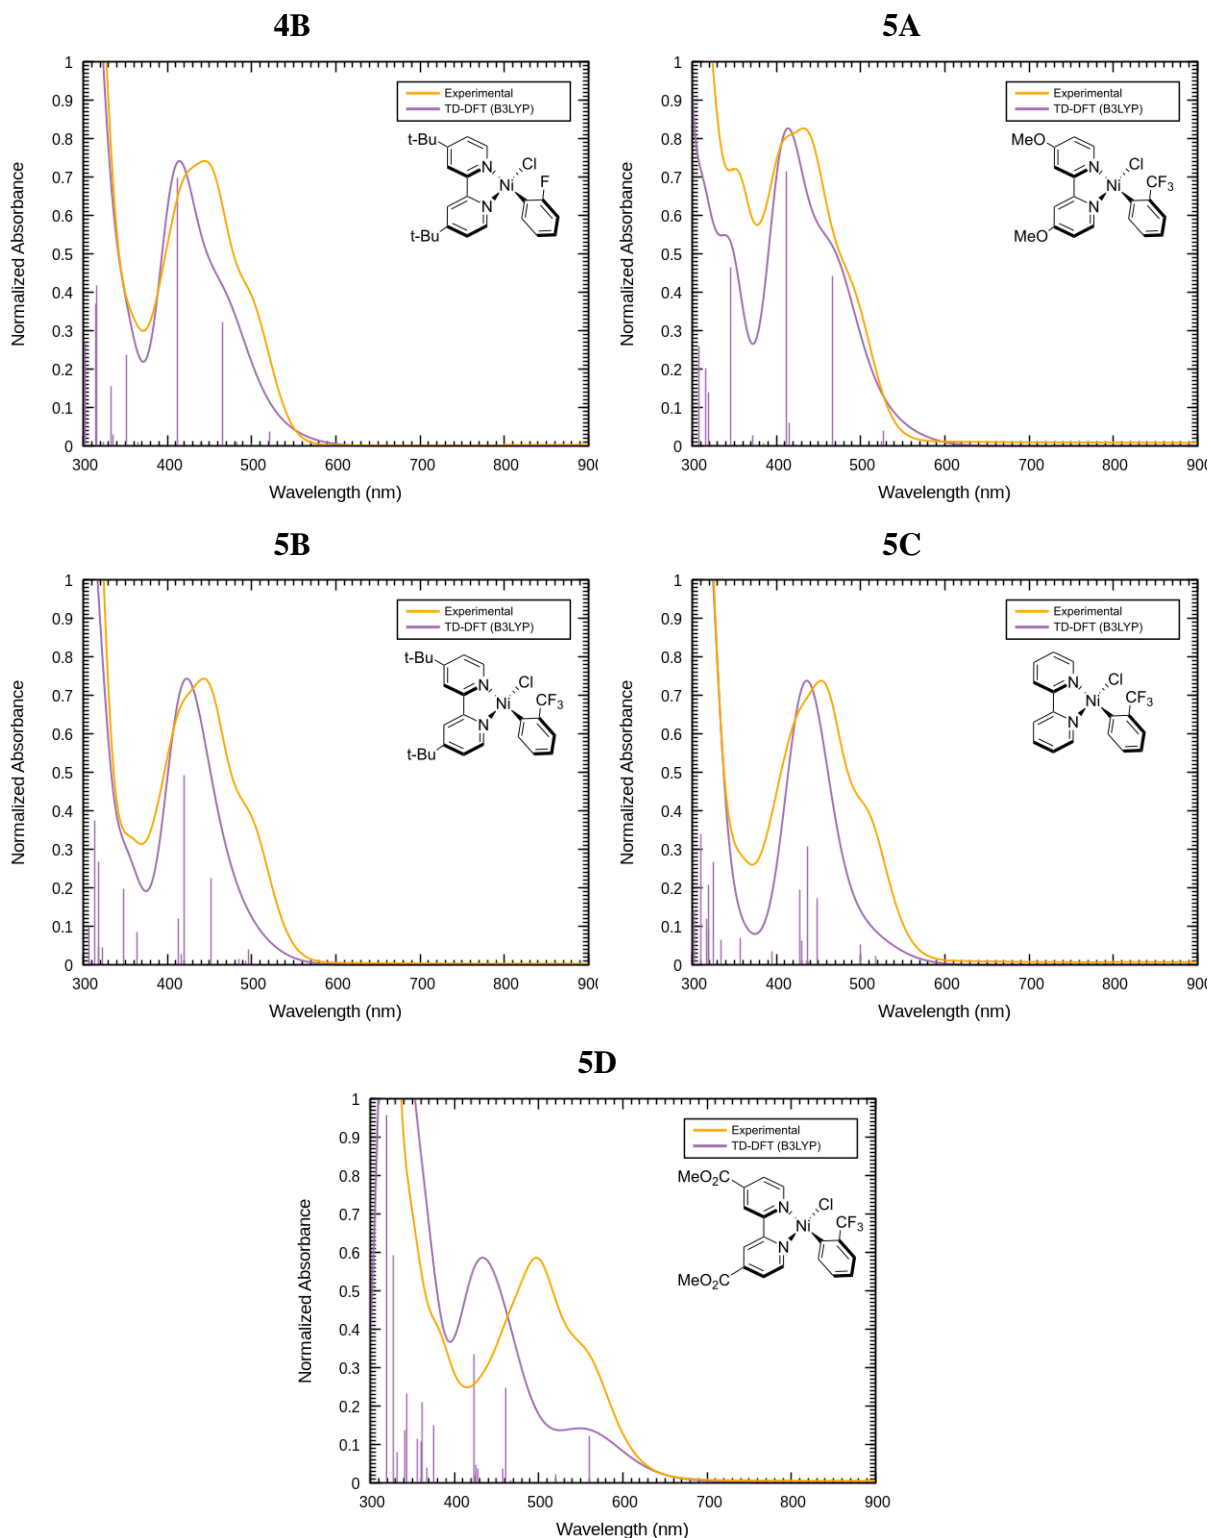

**Figure S62, cont.** Overlay of the experimental (THF) (orange) and calculated (purple) UV-vis spectra for the equilibrium structures of **1A–5D** at the TD-DFT (B3LYP) level with the CPCM(THF) solvation model.

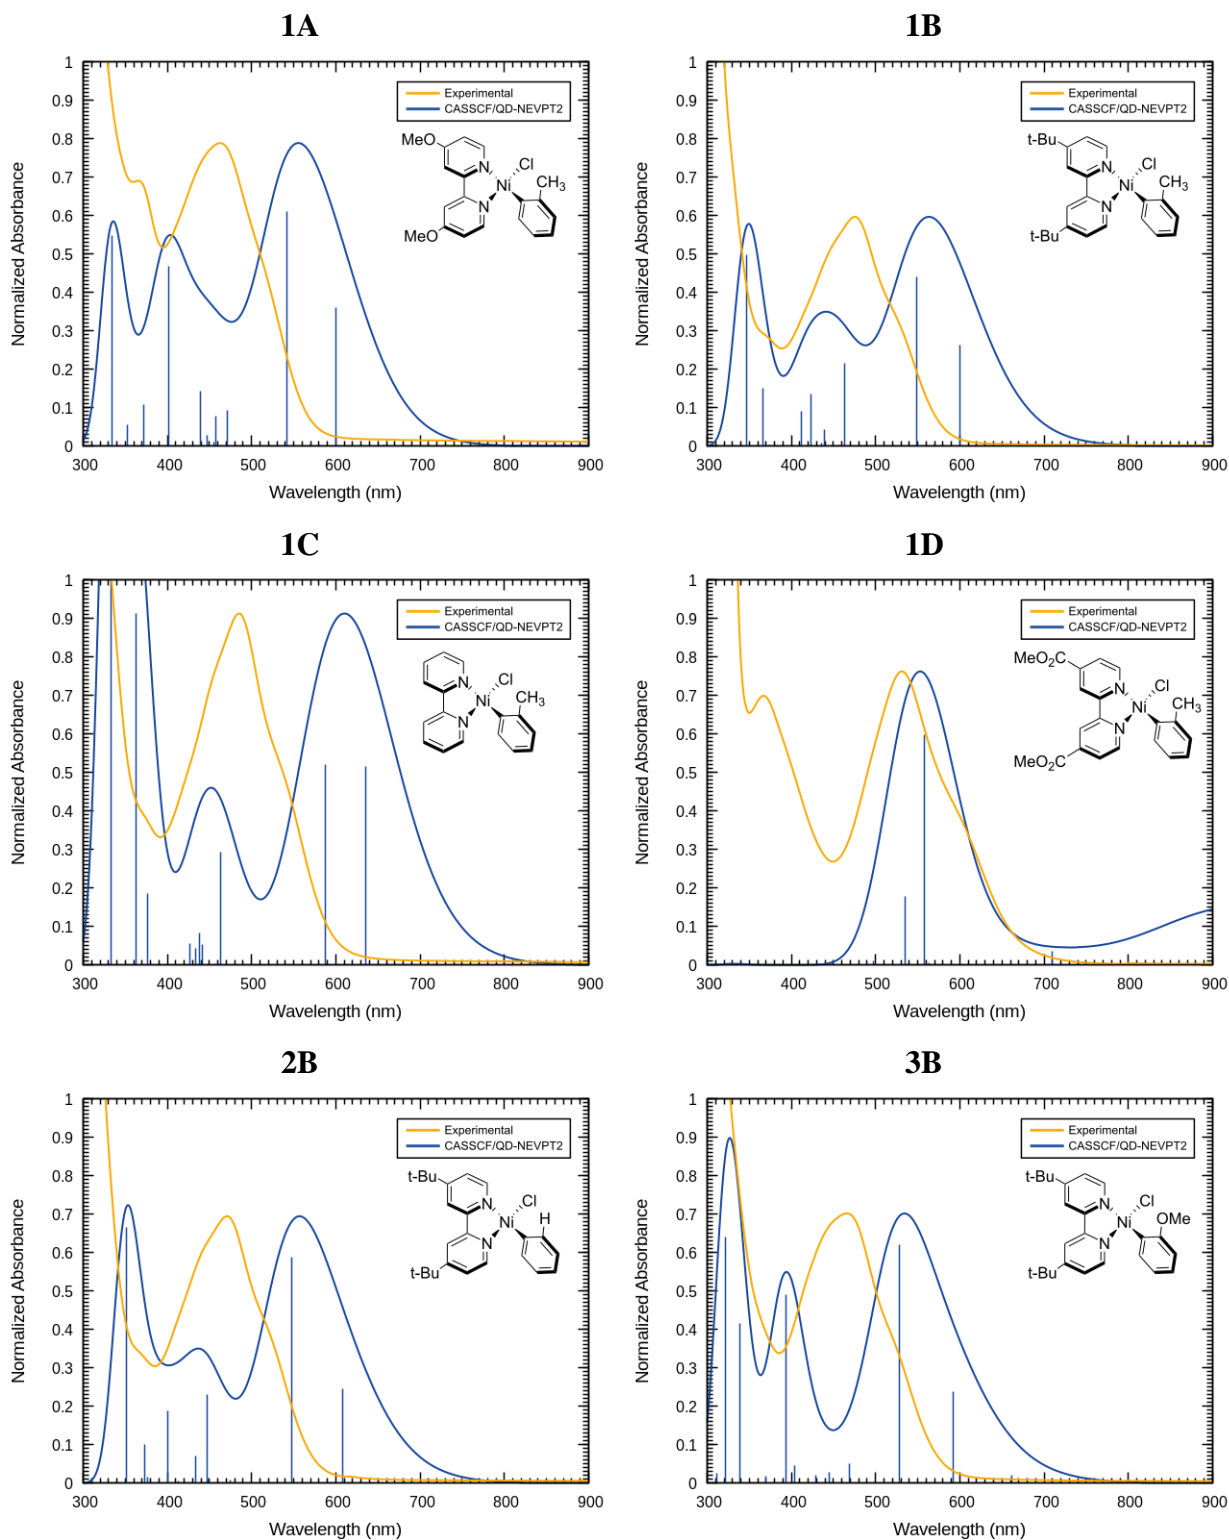

**Figure S63.** Overlay of the experimental (THF) (orange) and calculated (blue) UV-vis spectra for the equilibrium structures of **1A–5D** at the CASSCF/QD-NEVPT2 level with the CPCM(THF) solvation model; 10e,9o Active Space – 25 triplet roots, 15 singlet roots.

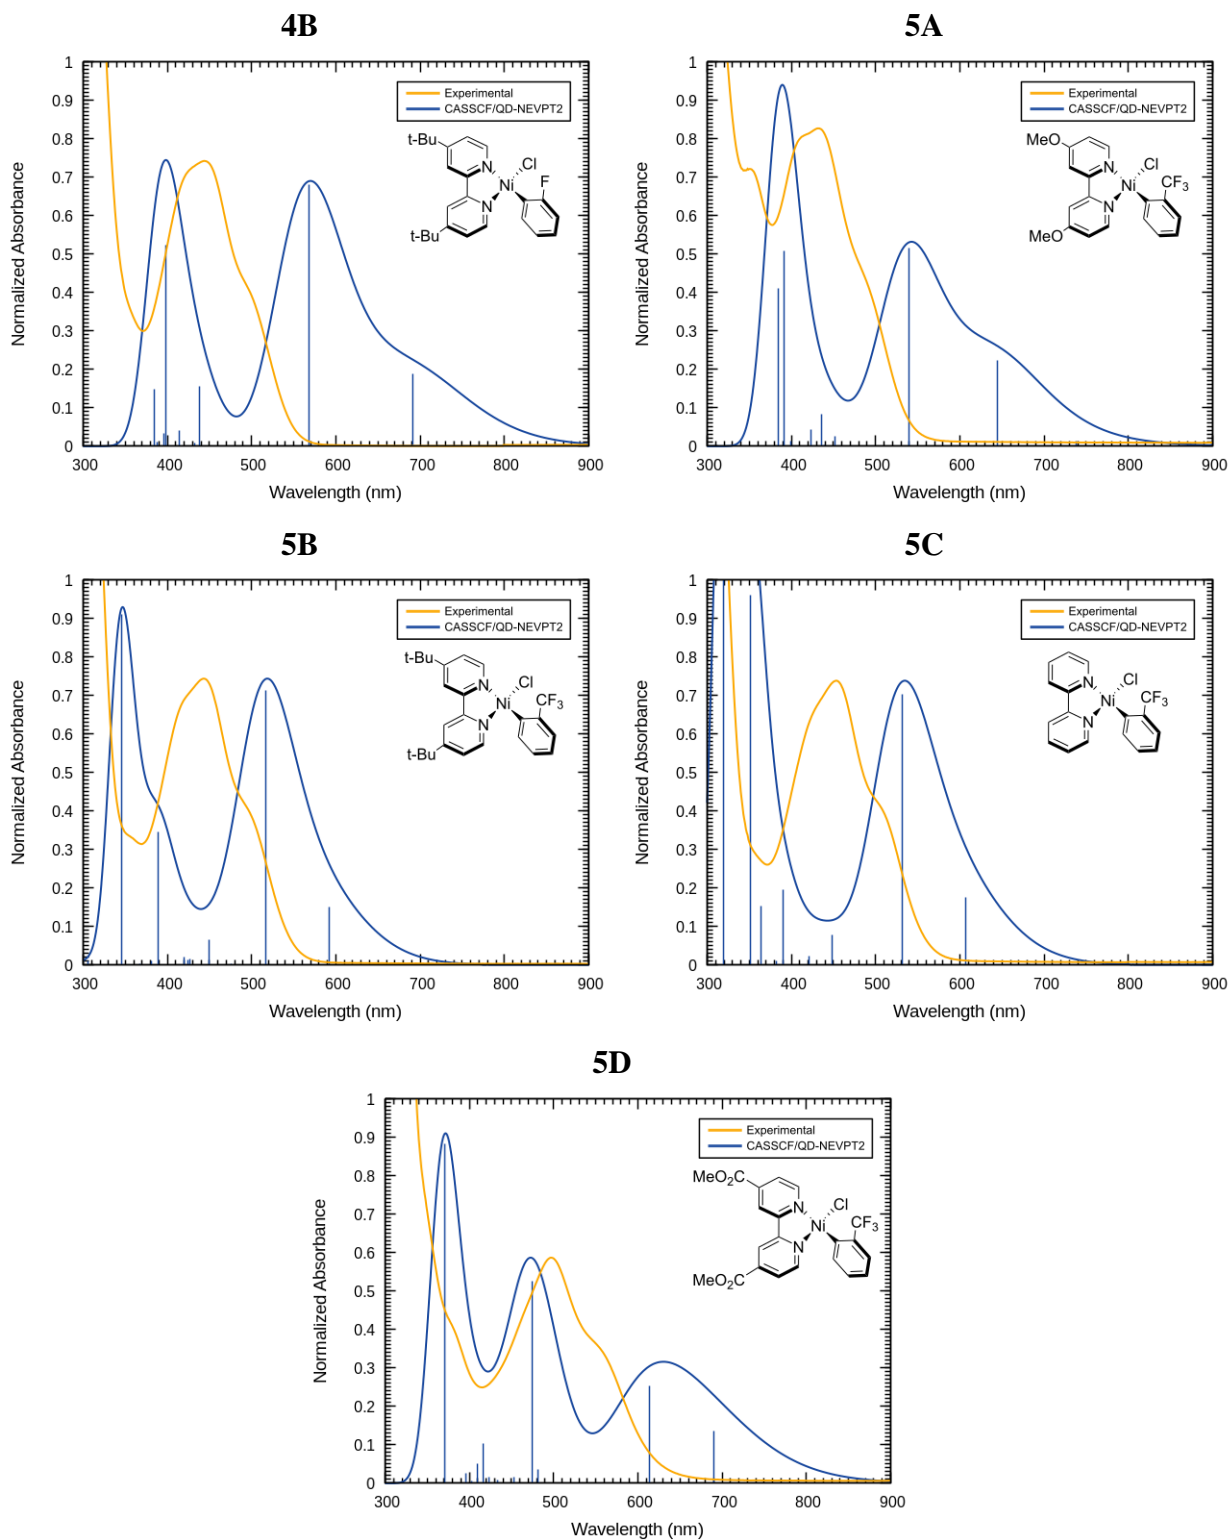

**Figure S63, cont.** Overlay of the experimental (THF) (orange) and calculated (blue) UV-vis spectra for the equilibrium structures of **1A–5D** at the CASSCF/QD-NEVPT2 level with the CPCM(THF) solvation model; 10e,9o Active Space – 25 triplet roots, 15 singlet roots.

## 1B-Br

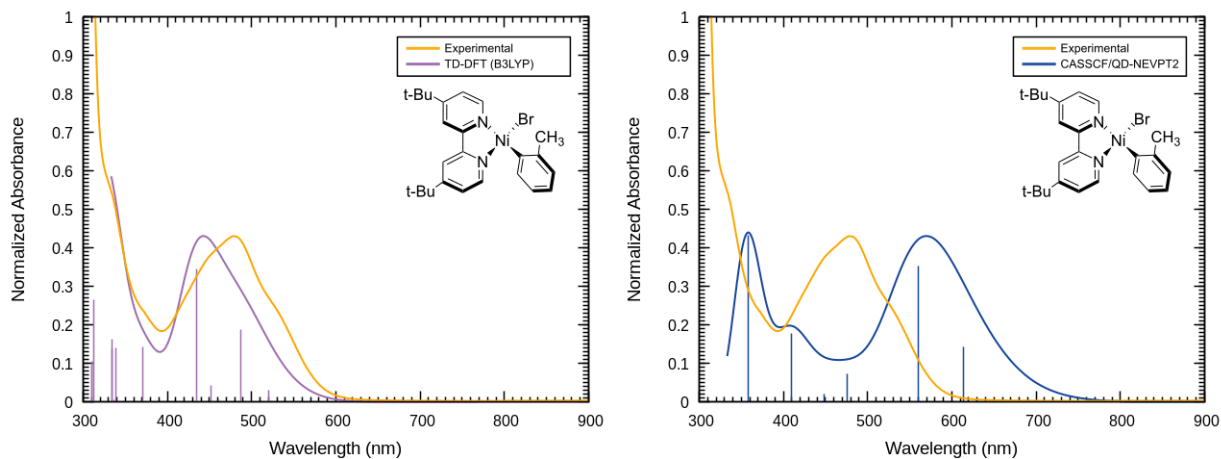

## Ni(TMEDA)(CH<sub>3</sub>Ph)Cl

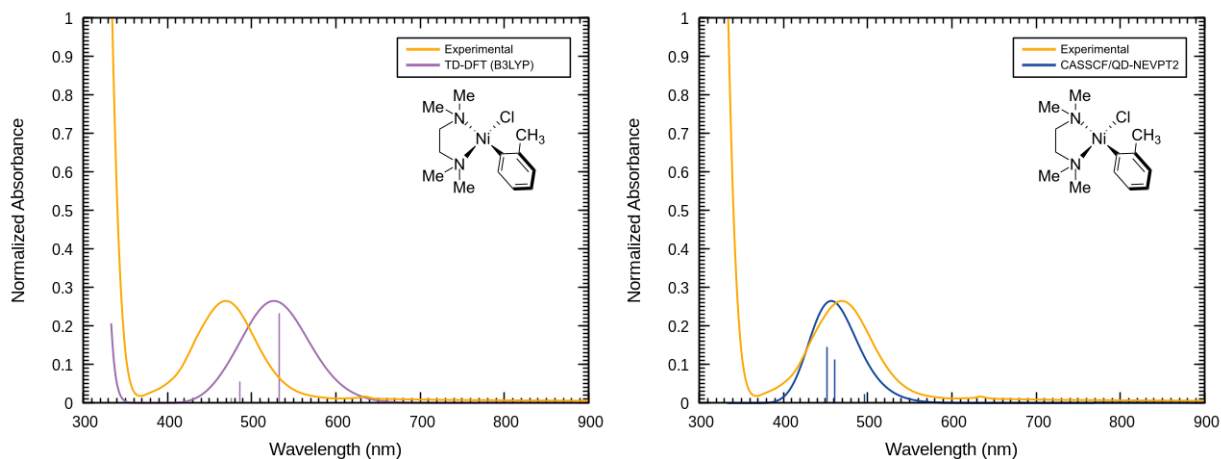

**Figure S64.** Overlay of the experimental (THF) (orange) and calculated UV-vis spectra of the equilibrium structures for **1B-Br** and **Ni(TMEDA)(CH<sub>3</sub>Ph)Cl** complexes at the TD-DFT (B3LYP) (purple) and CASSCF/QD-NEVPT2 (blue) levels with the CPCM(THF) solvation model.

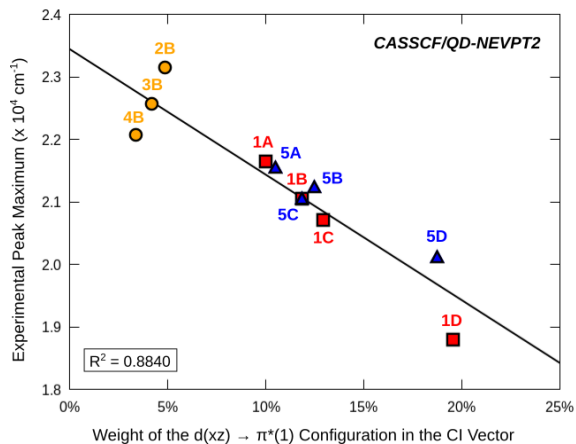

**Figure S65.** Correlation between the experimental peak maxima measured in THF solvent vs. the weight of the Ni  $d(xz) \rightarrow \text{bpy } \pi^*(1)$  configuration in the lowest-energy singlet CI vector of the equilibrium-geometry structures at the CASSCF/QD-NEVPT2 level; 10e, 9o Active Space – 25 triplet roots, 15 singlet roots.

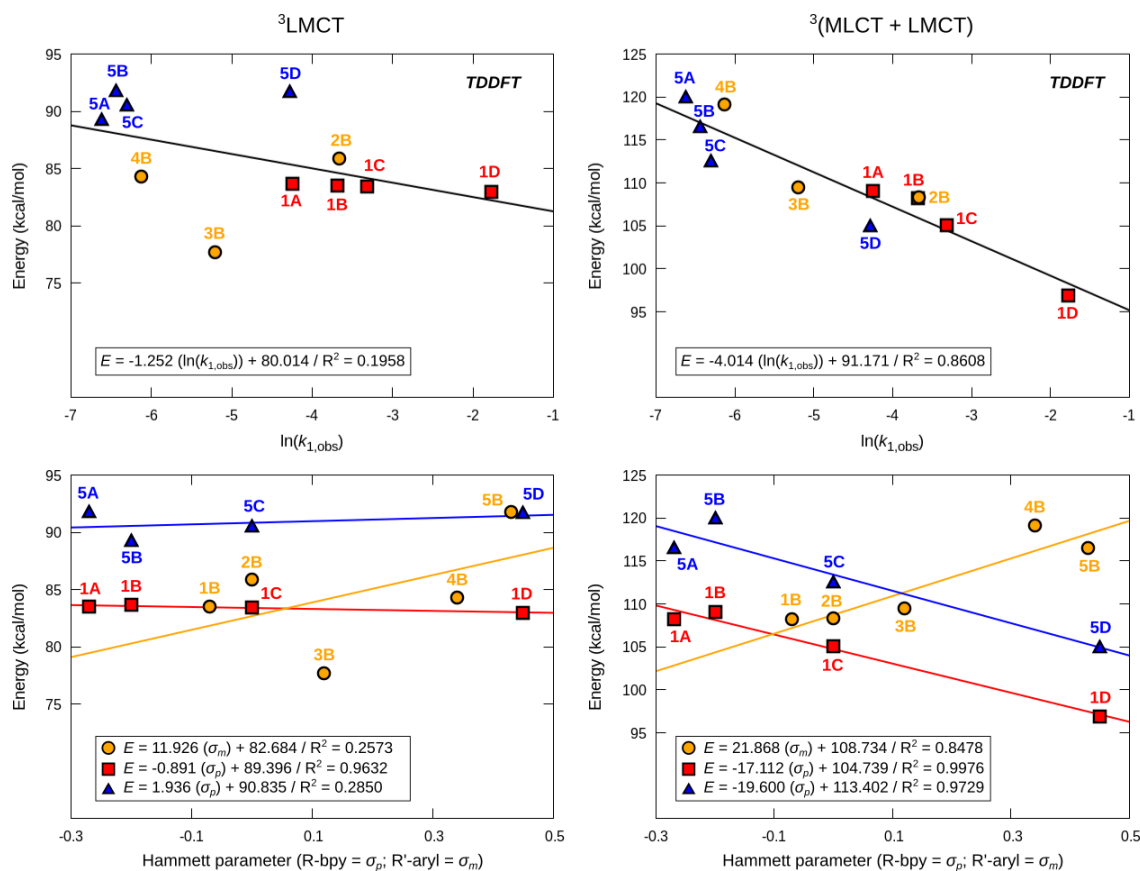

**Figure S66.** Correlation of the TD-DFT energies of the ‘one-photon, one-electron’ (left) and ‘one-photon, two-electron’ (right) triplet repulsive surfaces (*cf.* Figure 10 in the main text) at the singlet equilibrium geometry vs. the experimental rates of the Ni–C homolysis (top) and Hammett parameters (bottom) for **1A–5D** complexes.

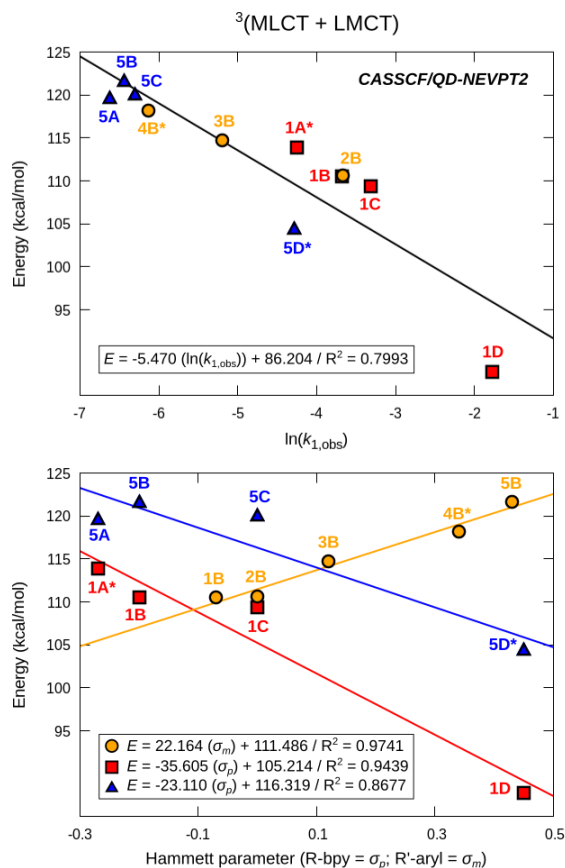

**Figure S67.** Correlation of the CASSCF/QD-NEVPT2 energies of the ‘one-photon, two-electron’ triplet repulsive surface ( $d(x^2-y^2)/C(sp^2) + d(yz) \rightarrow d(x^2-y^2)/C(sp^2)^* + bpy \pi^*(1)$ ; cf. Figure 10 in the main text) at the singlet equilibrium geometry vs. the experimental rates of the Ni–C homolysis (top) and Hammett parameters (bottom) for **1A–5D** complexes. The asterisks indicate the <sup>3</sup>(MLCT+LMCT) energies obtained from computations with increased number of triplet states to 30 in the state-averaged CASSCF/QD-NEVPT2 references. For these cases, the <sup>3</sup>(MLCT+LMCT) surface was otherwise not observed in the original calculations with 25 triplets.

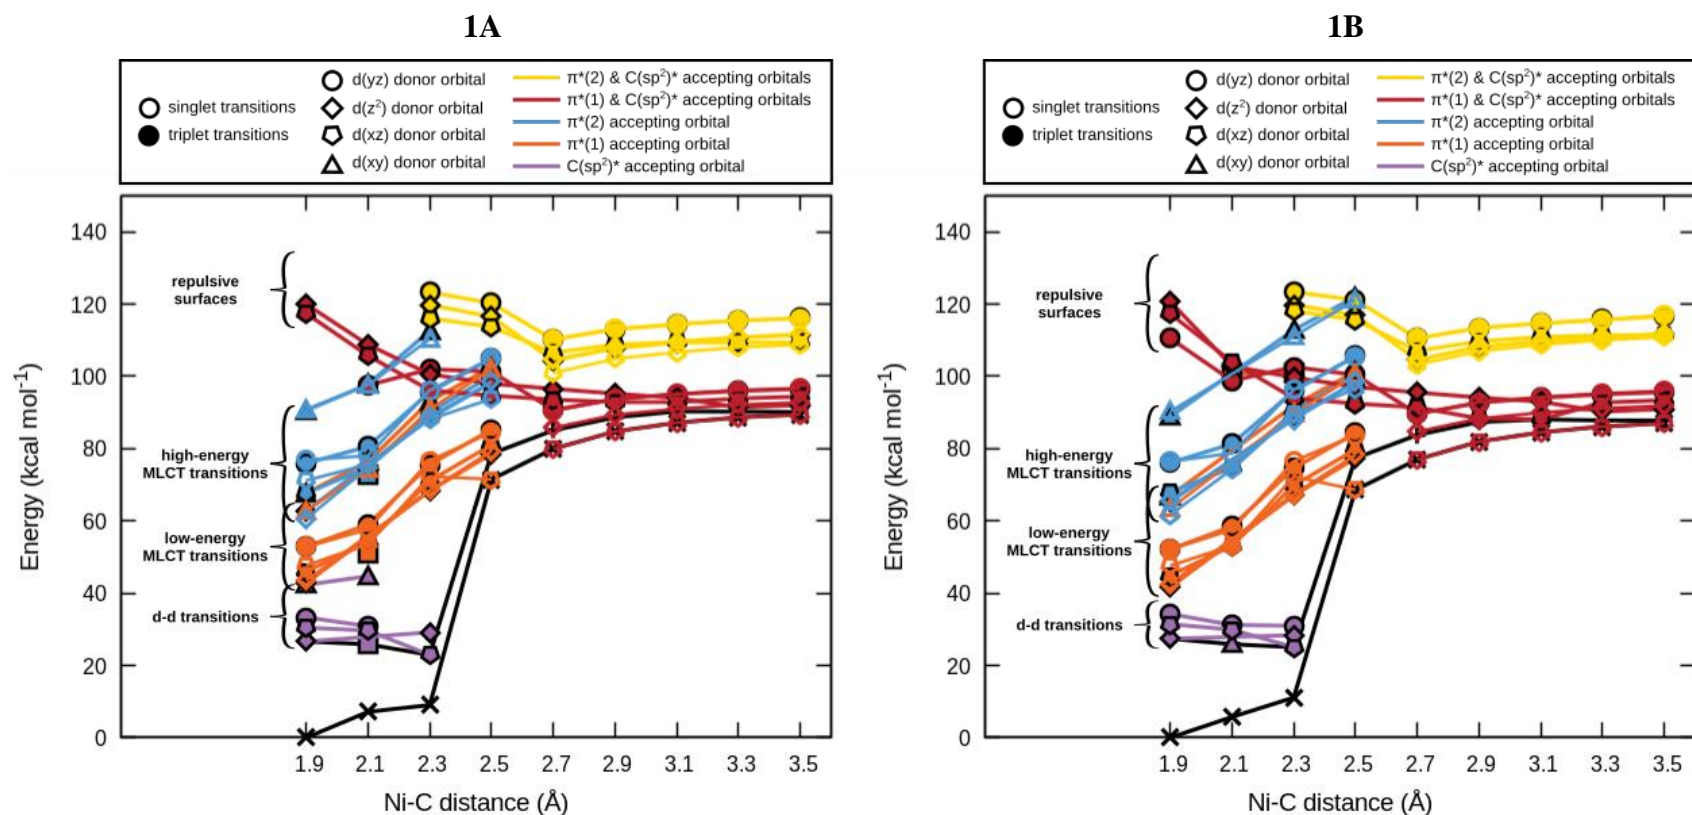

**Figure S68.** Relaxed ground and excited-state potential energy surfaces for **1A** (left) and **1B** (right) along the Ni–C coordinate at the CASSCF/QD-NEVPT2 level with the CPCM(THF) solvation model; 10e,9o Active Space – 25 triplet roots, 15 singlet roots. The structures were optimized at the DFT (BP86-D3) level with the CPCM(THF) solvation model as the BSS singlet ground states.



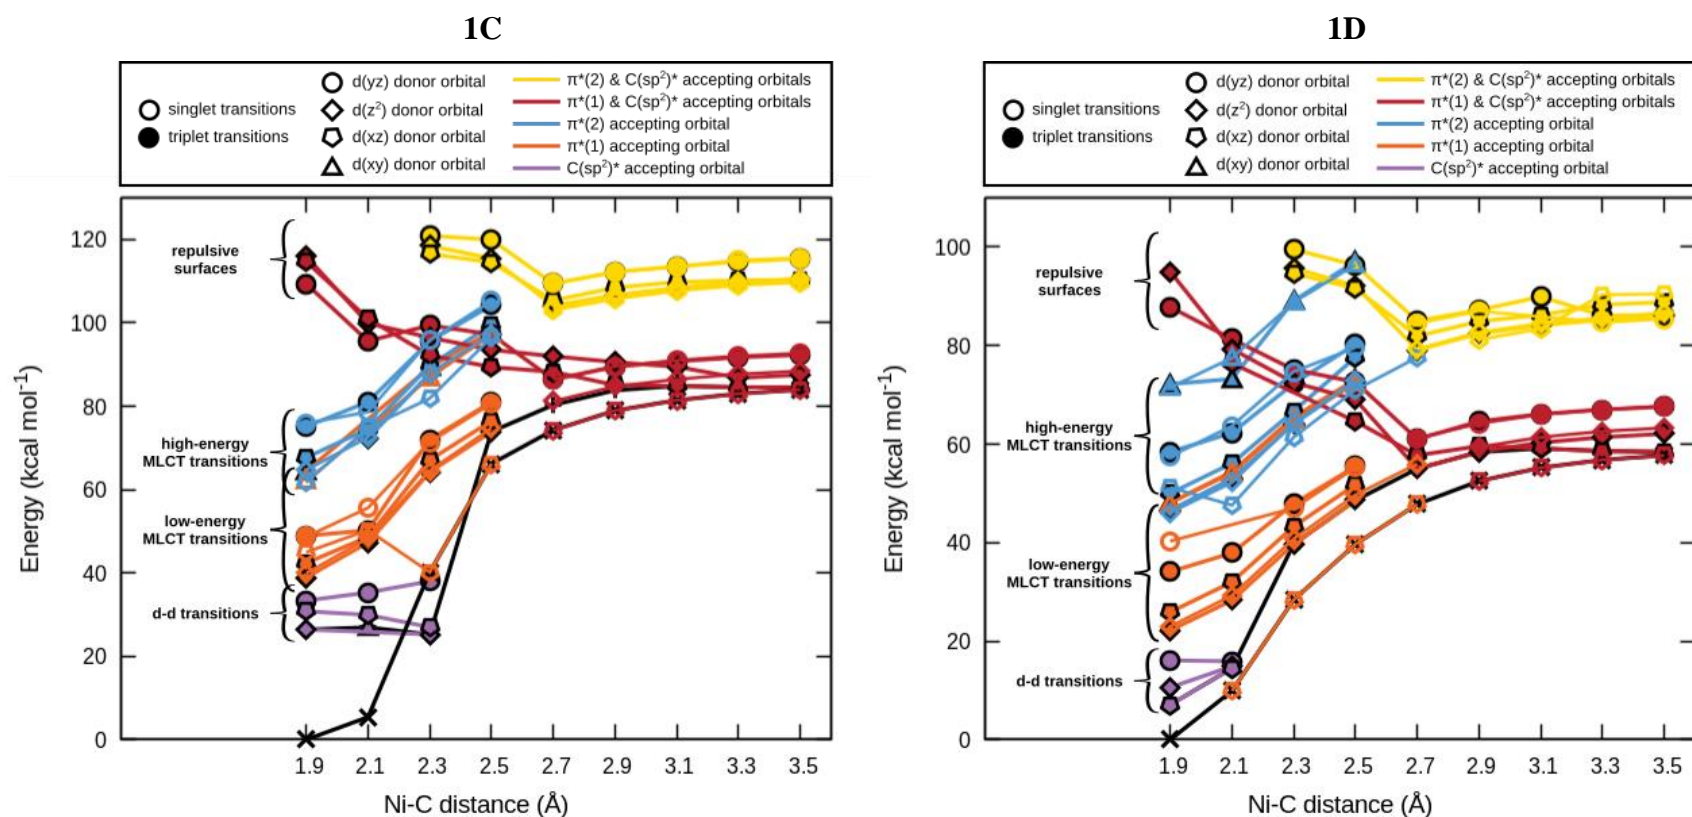

**Figure S68, cont.** Relaxed ground and excited-state potential energy surfaces for **1C** (left) and **1D** (right) along the Ni–C coordinate at the CASSCF/QD-NEVPT2 level with the CPCM(THF) solvation model; 10e,9o Active Space – 25 triplet roots, 15 singlet roots. The structures were optimized at the DFT (BP86-D3) level with the CPCM(THF) solvation model as the BSS singlet ground states.

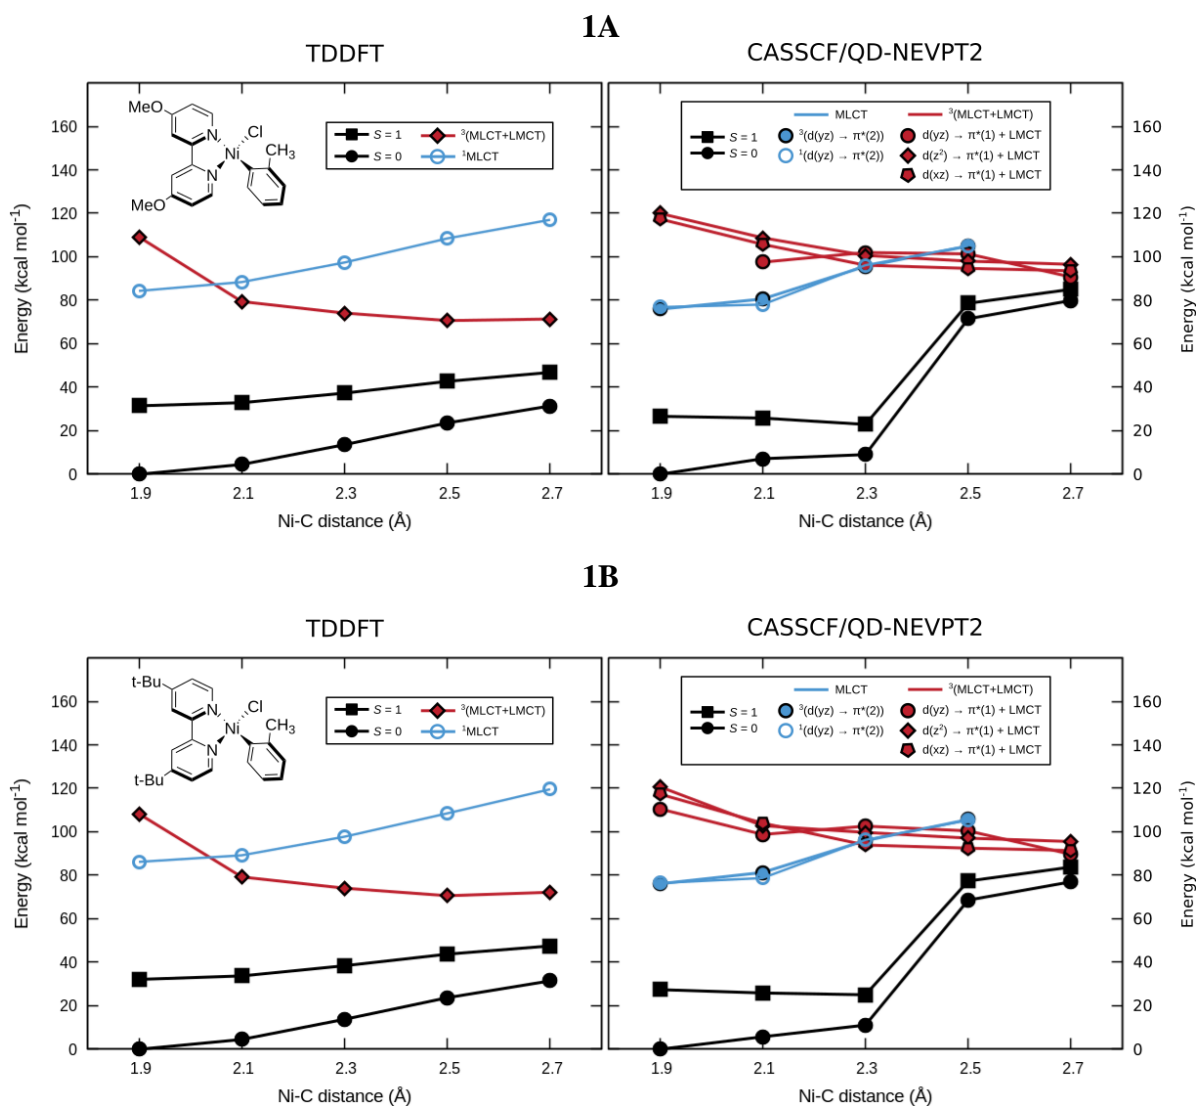

**Figure S69.** Relaxed ground and selected excited-state potential energy surfaces along the Ni–C coordinate at the TD-DFT (B3LYP) level (left) and CASSCF/QD-NEVPT2 level (right). The structures were optimized at the DFT (BP86-D3) level with CPCM(THF) solvation model as the BSS singlet ground states. The 10e, 9o active space with 25 triplet roots and 15 singlet roots was used for *ab initio* calculations at the equilibrium geometry, while the 10e, 8o active space was used for the structures with stretched (out-of-equilibrium) Ni–C bond distance where the bpy π\*(3) orbital occupancy is close to zero.

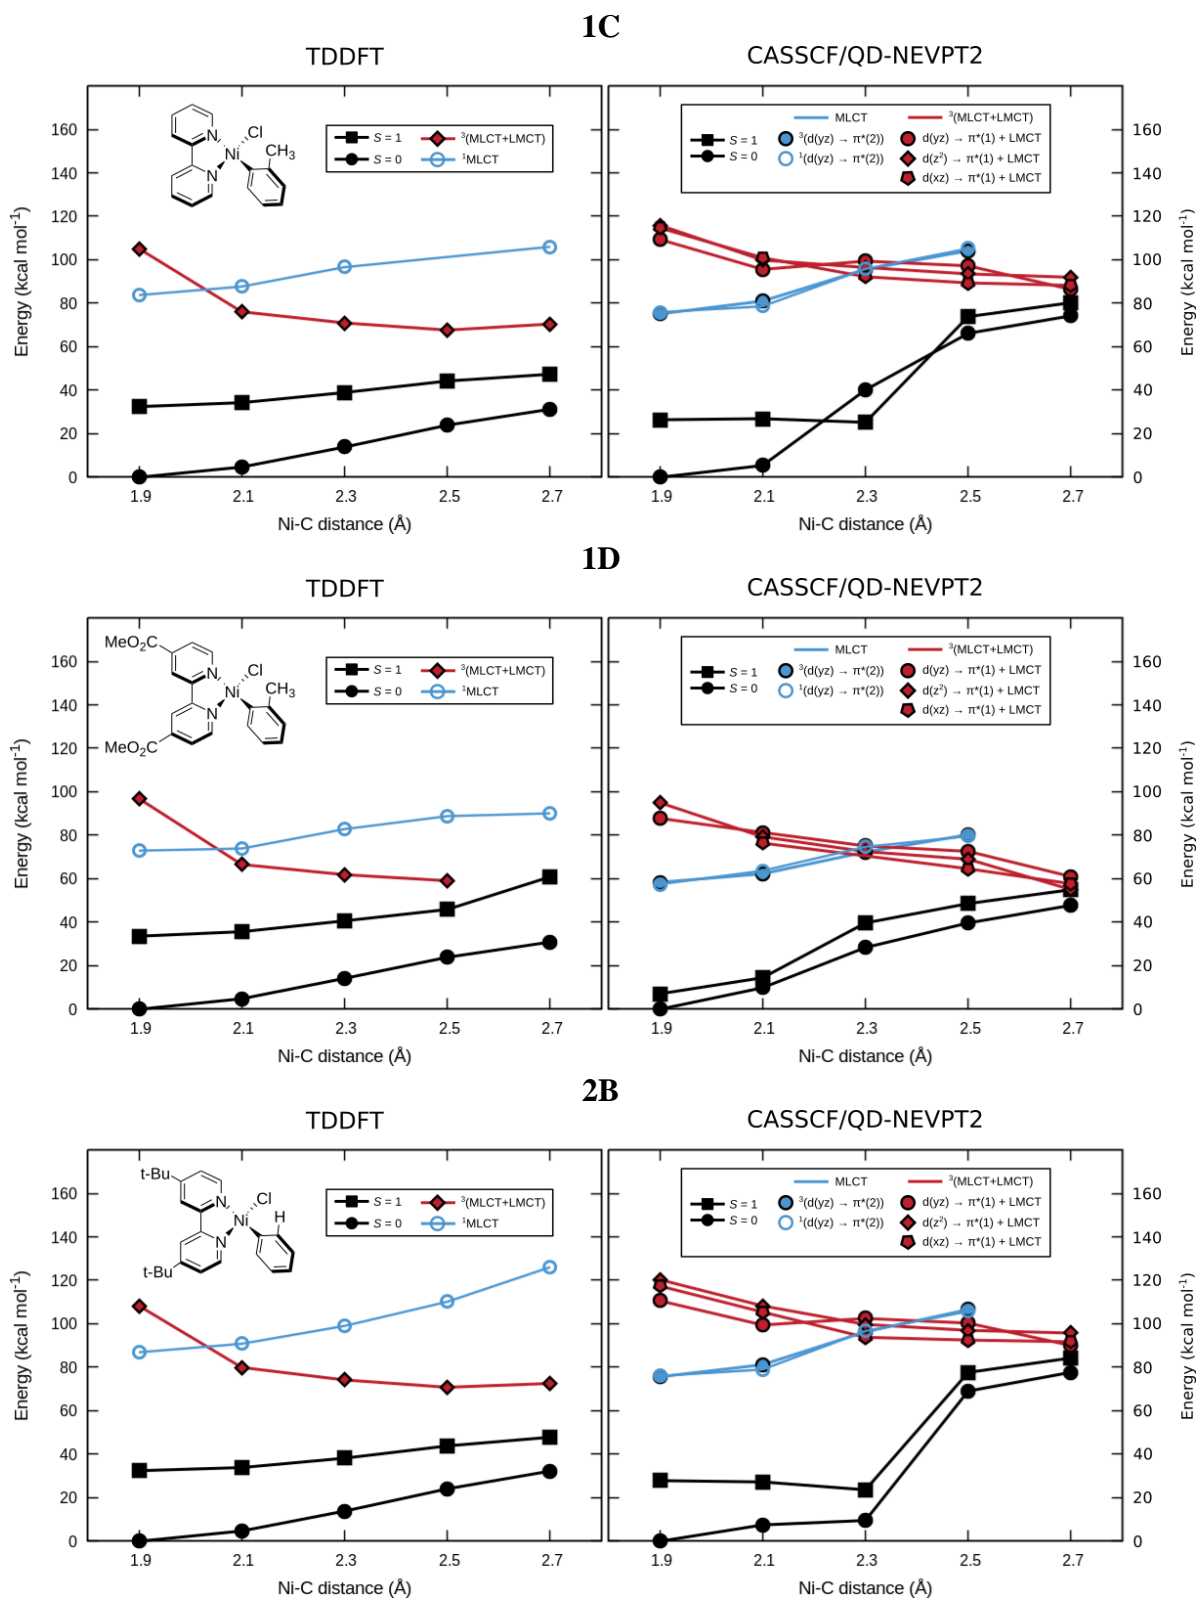

**Figure S69, cont.** Relaxed ground and selected excited-state potential energy surfaces along the Ni-C coordinate at the TD-DFT (B3LYP) level (left) and CASSCF/QD-NEVPT2 level (right).

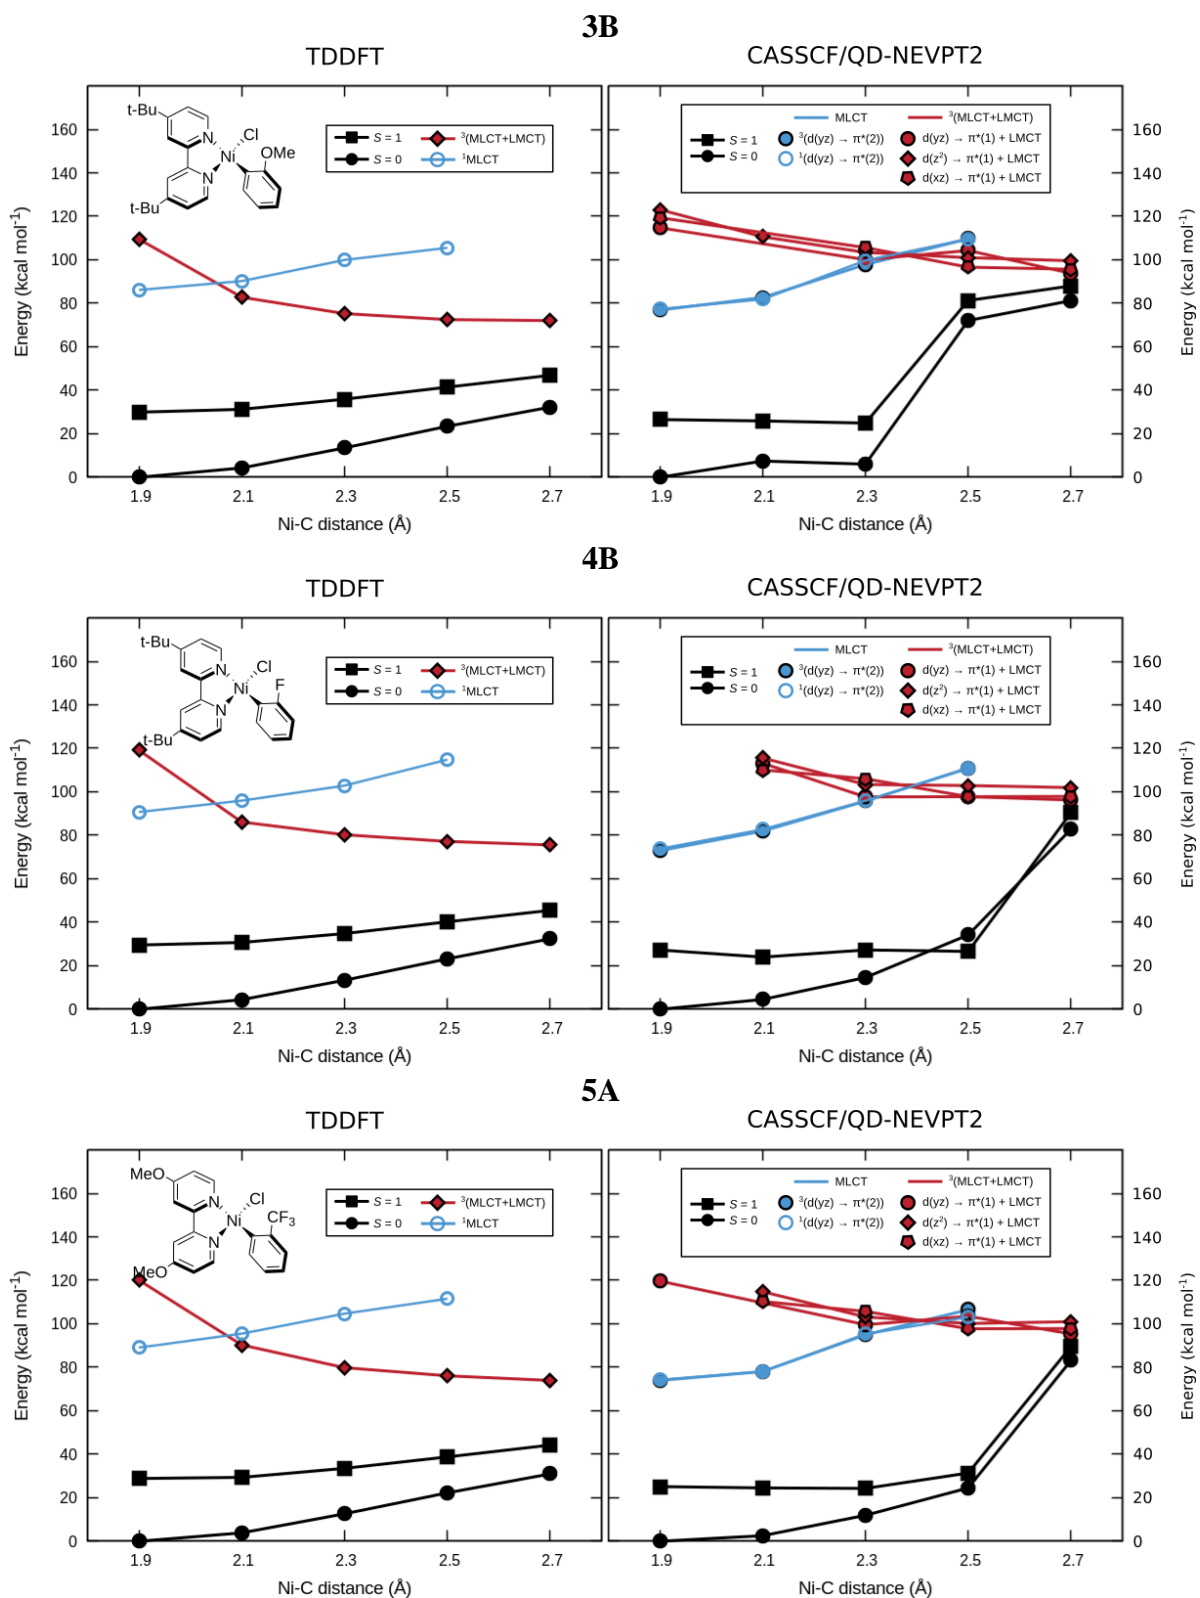

**Figure S69, cont.** Relaxed ground and selected excited-state potential energy surfaces along the Ni-C coordinate at the TD-DFT (B3LYP) level (left) and CASSCF/QD-NEVPT2 level (right).

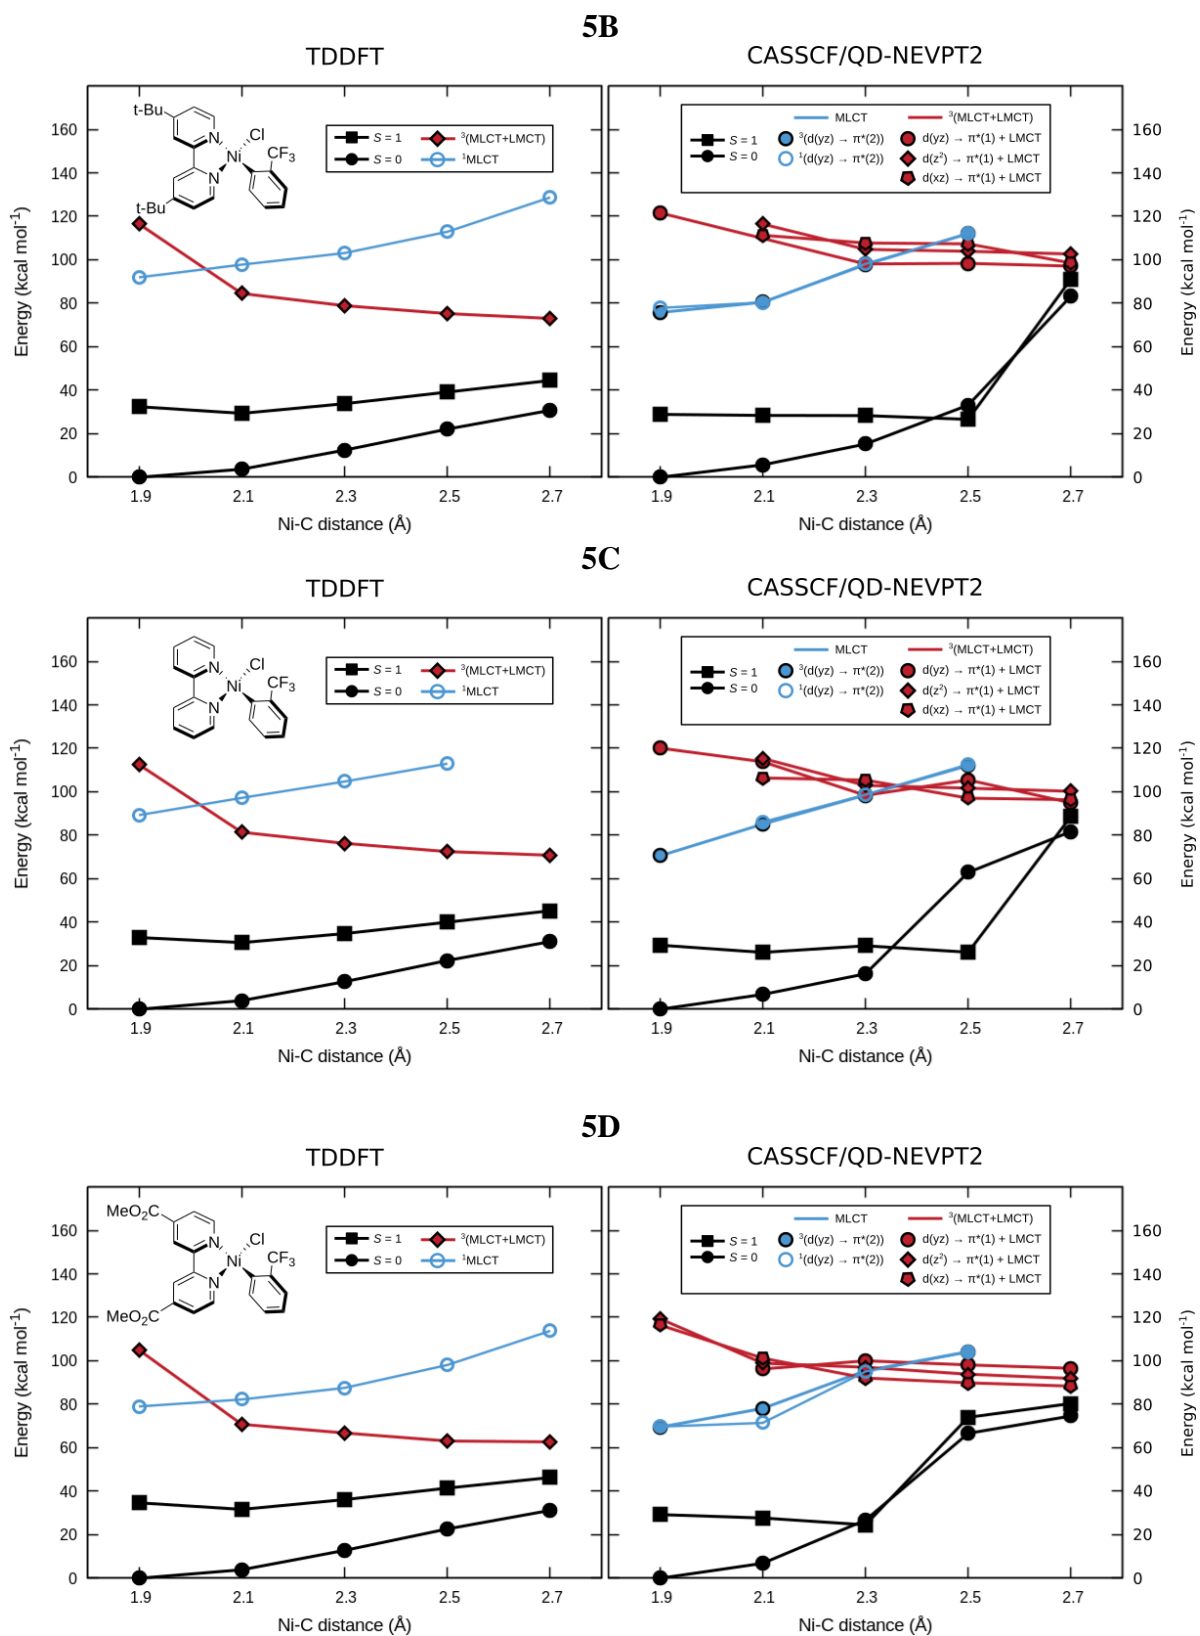

**Figure S69, cont.** Relaxed ground and selected excited-state potential energy surfaces along the Ni–C coordinate at the TD-DFT (B3LYP) level (left) and CASSCF/QD-NEVPT2 level (right).

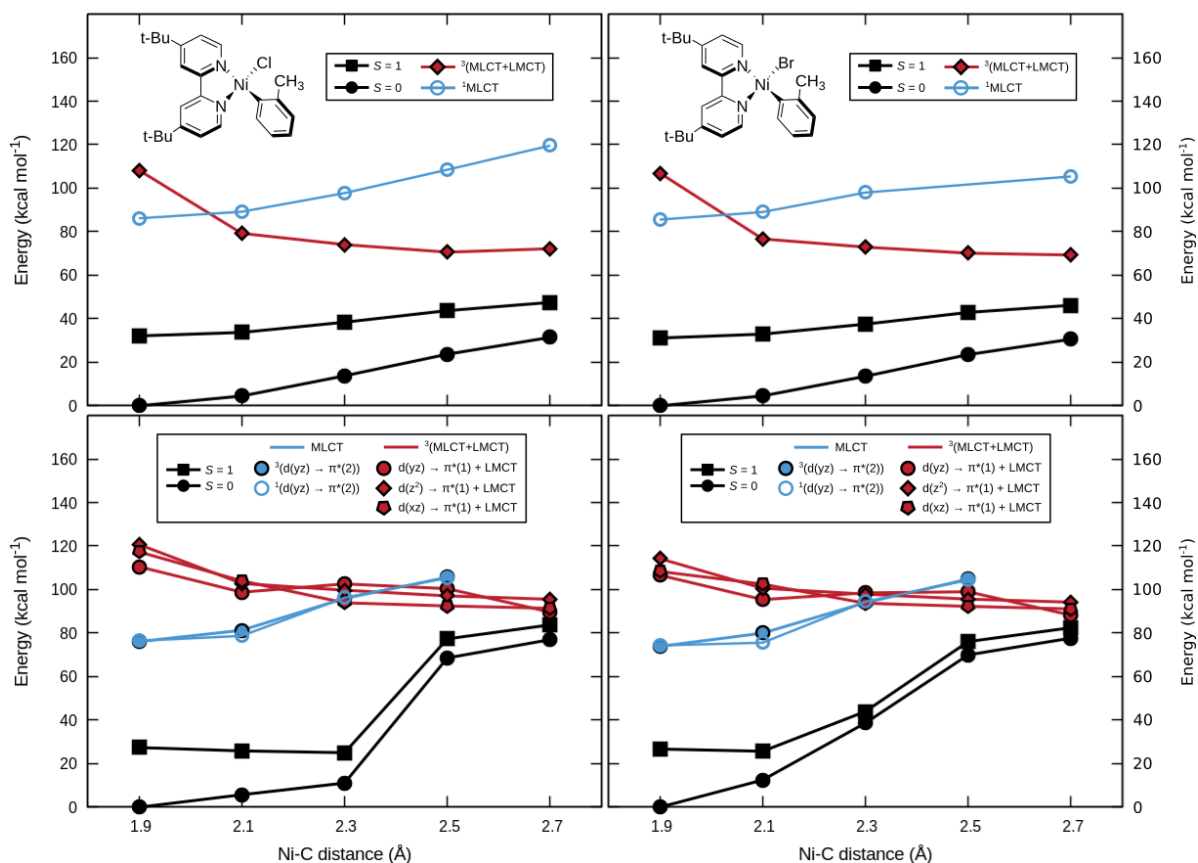

**Figure S70.** Comparison of the relaxed ground and selected excited-state potential energy surfaces for **1B** (left) and **1B-Br** (right) along the Ni-C coordinate at the TD-DFT (B3LYP) level (top) and CASSCF/QD-NEVPT2 level (bottom). The structures were optimized at the DFT (BP86-D3) level with CPCM(THF) solvation model as the BSS singlet ground states. The 10e, 9o active space with 25 triplet roots and 15 singlet roots was used for *ab initio* calculations at the equilibrium geometry, while the 10e, 8o active space was used for the structures with stretched (out-of-equilibrium) Ni-C bond distance where the bpy  $\pi^*(3)$  orbital occupancy is close to zero.

## S2.5 Additional Calculated Properties.

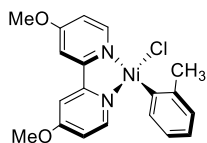

**1A** with Ni–C distance of 1.90 Å (near-equilibrium geometry) – CASSCF/NEVPT2 lowest transition energies with CPCM(THF) (10e,9o Active Space) – 25 triplet roots, 15 singlet roots. Active Space Orbitals (in order for CI vector notation below):  $d(x^2-y^2)/C(sp^2)$ ,  $d(xy)$ ,  $d(yz)$ ,  $d(z^2)$ ,  $d(xz)$ ,  $d(x^2-y^2)/C(sp^2)^*$ ,  $\pi^*(1)$ ,  $\pi^*(2)$ ,  $\pi^*(3)$ .

| State | Root | Multiplicity | $\Delta E/nm$ | $\Delta E/kcal\ mol^{-1}$ | CI vector | Contribution |
|-------|------|--------------|---------------|---------------------------|-----------|--------------|
| 0     | 0    | 1            | ---           | ---                       | 222220000 | 0.5585       |
|       |      |              |               |                           | 222210100 | 0.1562       |
|       |      |              |               |                           | 122221000 | 0.1275       |
| 1     | 0    | 3            | 1091.4        | 26.2                      | 222121000 | 0.7735       |
|       |      |              |               |                           | 122122000 | 0.1652       |
| 2     | 1    | 3            | 946.7         | 30.2                      | 222211000 | 0.5935       |
|       |      |              |               |                           | 221221000 | 0.1979       |
|       |      |              |               |                           | 122212000 | 0.1282       |
| 3     | 2    | 3            | 870.7         | 32.8                      | 221221000 | 0.5710       |
|       |      |              |               |                           | 222211000 | 0.2047       |
| 4     | 3    | 3            | 676.4         | 42.3                      | 222120100 | 0.8075       |
| 5     | 1    | 1            | 664.9         | 43.0                      | 222120100 | 0.8057       |
| 6     | 4    | 3            | 643.6         | 44.4                      | 212221000 | 0.6927       |
|       |      |              |               |                           | 221212000 | 0.1528       |
|       |      |              |               |                           | 112222000 | 0.1091       |
| 7     | 5    | 3            | 630.5         | 45.3                      | 222210100 | 0.8161       |
| 8     | 2    | 1            | 606.6         | 47.1                      | 222210100 | 0.4909       |
|       |      |              |               |                           | 221220100 | 0.2488       |
| 9     | 3    | 1            | 547.7         | 52.2                      | 221220100 | 0.5070       |
|       |      |              |               |                           | 222210100 | 0.1522       |
| 10    | 6    | 3            | 546.4         | 52.3                      | 221220100 | 0.7944       |
| 11    | 4    | 1            | 464.0         | 61.6                      | 222121000 | 0.4639       |
|       |      |              |               |                           | 222120010 | 0.2353       |
| 12    | 5    | 1            | 457.9         | 62.4                      | 222211000 | 0.5524       |
|       |      |              |               |                           | 212221000 | 0.1733       |
| 13    | 6    | 1            | 454.6         | 62.9                      | 212220100 | 0.5178       |
|       |      |              |               |                           | 221221000 | 0.1544       |
| 14    | 7    | 1            | 451.0         | 63.4                      | 212221000 | 0.5586       |
|       |      |              |               |                           | 222211000 | 0.1811       |
| 15    | 8    | 1            | 450.9         | 63.4                      | 222120010 | 0.5624       |
|       |      |              |               |                           | 222121000 | 0.1910       |
| 16    | 9    | 1            | 428.9         | 66.7                      | 221221000 | 0.5948       |
|       |      |              |               |                           | 212220100 | 0.1936       |
| 17    | 7    | 3            | 425.0         | 67.3                      | 222210010 | 0.8153       |
| 18    | 8    | 3            | 423.8         | 67.5                      | 212220100 | 0.7334       |
| 19    | 9    | 3            | 422.5         | 67.7                      | 222120010 | 0.6999       |
| 20    | 10   | 1            | 408.1         | 70.1                      | 222210010 | 0.5853       |

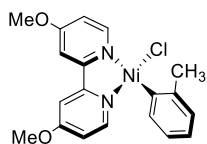

**1A** with Ni–C distance of 1.90 Å (near-equilibrium geometry) – CASSCF/QD-NEVPT2 lowest transition energies with CPCM(THF) (10e,9o Active Space) – 25 triplet roots, 15 singlet roots. Active Space Orbitals (in order for CI vector notation below):  $d(x^2-y^2)/C(sp^2)$ ,  $d(xy)$ ,  $d(yz)$ ,  $d(z^2)$ ,  $d(xz)$ ,  $d(x^2-y^2)/C(sp^2)^*$ ,  $\pi^*(1)$ ,  $\pi^*(2)$ ,  $\pi^*(3)$ .

| State | Root | Multiplicity | $\Delta E/nm$ | $\Delta E/kcal\ mol^{-1}$ | CI vector | Contribution |
|-------|------|--------------|---------------|---------------------------|-----------|--------------|
| 0     | 0    | 1            | ---           | ---                       | 222220000 | 0.5978       |
|       |      |              |               |                           | 122221000 | 0.1372       |
|       |      |              |               |                           | 222210100 | 0.1002       |
| 1     | 0    | 3            | 1073.2        | 26.6                      | 222121000 | 0.7669       |
|       |      |              |               |                           | 122122000 | 0.1613       |
| 2     | 1    | 3            | 937.9         | 30.5                      | 222211000 | 0.6345       |
|       |      |              |               |                           | 221221000 | 0.1537       |
|       |      |              |               |                           | 122212000 | 0.1367       |
| 3     | 2    | 3            | 859.0         | 33.3                      | 221221000 | 0.6117       |
|       |      |              |               |                           | 222211000 | 0.1617       |
| 4     | 3    | 3            | 675.8         | 42.3                      | 212221000 | 0.7049       |
| 5     | 4    | 3            | 668.0         | 42.8                      | 222120100 | 0.8035       |
| 6     | 1    | 1            | 656.9         | 43.5                      | 222120100 | 0.8005       |
| 7     | 5    | 3            | 621.3         | 46.0                      | 222210100 | 0.7498       |
| 8     | 2    | 1            | 599.5         | 47.7                      | 222210100 | 0.5744       |
|       |      |              |               |                           | 221220100 | 0.1661       |
| 9     | 3    | 1            | 541.7         | 52.8                      | 221220100 | 0.5834       |
|       |      |              |               |                           | 222210100 | 0.1000       |
| 10    | 6    | 3            | 540.2         | 52.9                      | 221220100 | 0.7875       |
| 11    | 4    | 1            | 471.7         | 60.6                      | 222120010 | 0.5749       |
|       |      |              |               |                           | 222121000 | 0.1430       |
| 12    | 5    | 1            | 457.1         | 62.5                      | 212221000 | 0.4106       |
|       |      |              |               |                           | 222211000 | 0.2097       |
| 13    | 7    | 3            | 455.6         | 62.8                      | 222120010 | 0.7808       |
| 14    | 6    | 1            | 455.3         | 62.8                      | 212220100 | 0.6890       |
| 15    | 7    | 1            | 446.7         | 64.0                      | 222211000 | 0.5926       |
|       |      |              |               |                           | 212221000 | 0.1153       |
| 16    | 8    | 1            | 439.8         | 65.0                      | 222121000 | 0.2981       |
|       |      |              |               |                           | 212221000 | 0.1886       |
|       |      |              |               |                           | 222120010 | 0.1628       |
|       |      |              |               |                           | 222210010 | 0.1243       |
| 17    | 8    | 3            | 422.5         | 67.7                      | 222210010 | 0.7926       |
| 18    | 9    | 3            | 422.1         | 67.7                      | 212220100 | 0.7247       |
| 19    | 9    | 1            | 420.6         | 68.0                      | 221221000 | 0.7703       |
| 20    | 10   | 1            | 401.6         | 71.2                      | 222210010 | 0.3262       |
|       |      |              |               |                           | 222121000 | 0.2591       |



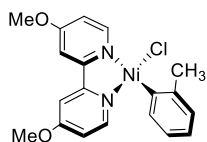

**1A** with Ni–C distance of 3.50 Å (dissociation limit) – CASSCF/NEVPT2 lowest transition energies with CPCM(THF) (10e,8o Active Space) – 25 triplet roots, 15 singlet roots. Active Space Orbitals (in order for CI vector notation below):  $d(xy)$ ,  $d(yz)$ ,  $d(z^2)$ ,  $d(xz)$ ,  $d(x^2-y^2)/C(sp^2)$ ,  $d(x^2-y^2)/C(sp^2)^*$ ,  $\pi^*(1)$ ,  $\pi^*(2)$ .

| State | Root | Multiplicity | $\Delta E/\text{nm}$ | $\Delta E/\text{kcal mol}^{-1}$ | CI vector | Contribution |
|-------|------|--------------|----------------------|---------------------------------|-----------|--------------|
| 0     | 0    | 1            | ---                  | ---                             | 22211110  | 0.7924       |
| 1     | 0    | 3            | 46636.0              | 0.6                             | 22211110  | 0.8265       |
| 2     | 1    | 3            | 14702.6              | 1.9                             | 22121110  | 0.9140       |
| 3     | 1    | 1            | 10708.2              | 2.7                             | 22121110  | 0.9115       |
| 4     | 2    | 3            | 8819.9               | 3.2                             | 22121110  | 0.9527       |
| 5     | 3    | 3            | 6645.8               | 4.3                             | 22211110  | 0.8465       |
| 6     | 4    | 3            | 4511.7               | 6.3                             | 21221110  | 0.8599       |
| 7     | 2    | 1            | 4317.6               | 6.6                             | 21221110  | 0.8317       |
| 8     | 5    | 3            | 3990.1               | 7.2                             | 21221110  | 0.8702       |
| 9     | 3    | 1            | 1551.5               | 18.4                            | 22211101  | 0.6801       |
|       |      |              |                      |                                 | 22121101  | 0.1246       |
| 10    | 6    | 3            | 1503.7               | 19.0                            | 22211101  | 0.7281       |
|       |      |              |                      |                                 | 22121101  | 0.1109       |
| 11    | 4    | 1            | 1474.2               | 19.4                            | 21212110  | 0.4625       |
|       |      |              |                      |                                 | 12221110  | 0.4583       |
| 12    | 7    | 3            | 1451.2               | 19.7                            | 12221110  | 0.4718       |
|       |      |              |                      |                                 | 21212110  | 0.4667       |
| 13    | 8    | 3            | 1363.0               | 21.0                            | 12221110  | 0.4860       |
|       |      |              |                      |                                 | 21212110  | 0.4484       |
| 14    | 5    | 1            | 1344.6               | 21.3                            | 22121101  | 0.7815       |
|       |      |              |                      |                                 | 22211101  | 0.1173       |
| 15    | 9    | 3            | 1343.1               | 21.3                            | 22121101  | 0.8996       |
| 16    | 10   | 3            | 1301.6               | 22.0                            | 22121101  | 0.8457       |
| 17    | 11   | 3            | 1242.0               | 23.0                            | 22211101  | 0.8249       |
| 18    | 12   | 3            | 1225.9               | 23.3                            | 22220110  | 0.8298       |
| 19    | 6    | 1            | 1225.3               | 23.3                            | 22220110  | 0.8305       |
| 20    | 13   | 3            | 1100.3               | 26.0                            | 21221101  | 0.8411       |

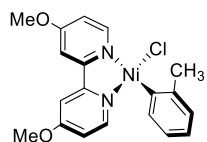

**1A** with Ni–C distance of 3.50 Å (dissociation limit) – CASSCF/QD-NEVPT2 lowest transition energies with CPCM(THF) (10e,8o Active Space) – 25 triplet roots, 15 singlet roots. Active Space Orbitals (in order for CI vector notation below):  $d(xy)$ ,  $d(yz)$ ,  $d(z^2)$ ,  $d(xz)$ ,  $d(x^2-y^2)/C(sp^2)$ ,  $d(x^2-y^2)/C(sp^2)^*$ ,  $\pi^*(1)$ ,  $\pi^*(2)$ .

| State | Root | Multiplicity | $\Delta E/\text{nm}$ | $\Delta E/\text{kcal mol}^{-1}$ | CI vector | Contribution |
|-------|------|--------------|----------------------|---------------------------------|-----------|--------------|
| 0     | 0    | 1            | ---                  | ---                             | 22211110  | 0.7414       |
| 1     | 0    | 3            | 42625.7              | 0.7                             | 22211110  | 0.7807       |
| 2     | 1    | 3            | 10841.3              | 2.6                             | 22121110  | 0.9126       |
| 3     | 1    | 1            | 8507.7               | 3.4                             | 22121110  | 0.9106       |
| 4     | 2    | 3            | 7259.0               | 3.9                             | 22121110  | 0.9530       |
| 5     | 3    | 3            | 5744.8               | 5.0                             | 22211110  | 0.8423       |
| 6     | 4    | 3            | 4062.1               | 7.0                             | 21221110  | 0.8592       |
| 7     | 2    | 1            | 3918.3               | 7.3                             | 21221110  | 0.8266       |
| 8     | 5    | 3            | 3642.1               | 7.9                             | 21221110  | 0.8687       |
| 9     | 3    | 1            | 1474.8               | 19.4                            | 22211101  | 0.7396       |
| 10    | 6    | 3            | 1431.5               | 20.0                            | 22211101  | 0.7606       |
| 11    | 4    | 1            | 1426.6               | 20.0                            | 21212110  | 0.4647       |
|       |      |              |                      |                                 | 12221110  | 0.4452       |
| 12    | 7    | 3            | 1404.4               | 20.4                            | 21212110  | 0.4650       |
|       |      |              |                      |                                 | 12221110  | 0.4529       |
| 13    | 8    | 3            | 1321.4               | 21.6                            | 12221110  | 0.4810       |
|       |      |              |                      |                                 | 21212110  | 0.4512       |
| 14    | 9    | 3            | 1298.6               | 22.0                            | 22121101  | 0.9076       |
| 15    | 5    | 1            | 1283.7               | 22.3                            | 22121101  | 0.8932       |
| 16    | 10   | 3            | 1248.0               | 22.9                            | 22121101  | 0.9287       |
| 17    | 11   | 3            | 1205.1               | 23.7                            | 22211101  | 0.8373       |
| 18    | 12   | 3            | 1189.6               | 24.0                            | 22220110  | 0.8109       |
| 19    | 6    | 1            | 1189.5               | 24.0                            | 22220110  | 0.8246       |
| 20    | 7    | 1            | 1075.3               | 26.6                            | 21221101  | 0.7920       |

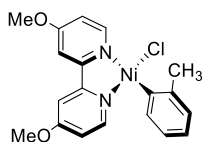

**1A** with Ni–C distance of 1.90 Å (near-equilibrium geometry) – CASSCF/NEVPT2 composition of the singlet ground state with CPCM(THF) (10e,9o Active Space) – 25 triplet roots, 15 singlet roots. Active Space Orbitals (in order for CI vector notation below):  $d(x^2-y^2)/C(sp^2)$ ,  $d(xy)$ ,  $d(yz)$ ,  $d(z^2)$ ,  $d(xz)$ ,  $d(x^2-y^2)/C(sp^2)^*$ ,  $\pi^*(1)$ ,  $\pi^*(2)$ ,  $\pi^*(3)$ .

| CI vector                      | Transition                                                                       | Contribution |
|--------------------------------|----------------------------------------------------------------------------------|--------------|
| 222220000                      | Closed-shell singlet (CSS) $d^8$                                                 | 0.5585       |
| 222210100                      | $d(xz) \rightarrow \pi^*(1)$                                                     | 0.1562       |
| 122221000                      | $d(x^2-y^2)/C(sp^2) \rightarrow d(x^2-y^2)/C(sp^2)^*$                            | 0.1275       |
| 221220100                      | $d(yz) \rightarrow \pi^*(1)$                                                     | 0.0283       |
| 222210010                      | $d(xz) \rightarrow \pi^*(2)$                                                     | 0.0211       |
| 022212100                      | $2x[d(x^2-y^2)/C(sp^2)] + d(xz) \rightarrow 2x[d(x^2-y^2)/C(sp^2)^*] + \pi^*(1)$ | 0.0209       |
| 222022000                      | $2x[d(z^2)] \rightarrow 2x[d(x^2-y^2)/C(sp^2)^*]$                                | 0.0114       |
| 222121000                      | $d(z^2) \rightarrow d(x^2-y^2)/C(sp^2)^*$                                        | 0.0112       |
| 221220001                      | $d(yz) \rightarrow \pi^*(3)$                                                     | 0.0101       |
| <b>Sum of CSS</b>              |                                                                                  | <b>56 %</b>  |
| <b>Sum of all MLCT</b>         |                                                                                  | <b>22 %</b>  |
| <b>Sum of all d-d</b>          |                                                                                  | <b>15 %</b>  |
| <b>Sum of mixed MLCT + d-d</b> |                                                                                  | <b>2 %</b>   |

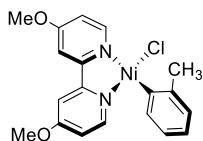

**1A** with Ni–C distance of 1.90 Å (near-equilibrium geometry) – CASSCF/QD-NEVPT2 composition of the singlet ground state with CPCM(THF) (10e,9o Active Space) – 25 triplet roots, 15 singlet roots. Active Space Orbitals (in order for CI vector notation below):  $d(x^2-y^2)/C(sp^2)$ ,  $d(xy)$ ,  $d(yz)$ ,  $d(z^2)$ ,  $d(xz)$ ,  $d(x^2-y^2)/C(sp^2)^*$ ,  $\pi^*(1)$ ,  $\pi^*(2)$ ,  $\pi^*(3)$ .

| CI vector                      | Transition                                                                       | Contribution |
|--------------------------------|----------------------------------------------------------------------------------|--------------|
| 222220000                      | Closed-shell singlet (CSS) $d^8$                                                 | 0.5978       |
| 122221000                      | $d(x^2-y^2)/C(sp^2) \rightarrow d(x^2-y^2)/C(sp^2)^*$                            | 0.1372       |
| 222210100                      | $d(xz) \rightarrow \pi^*(1)$                                                     | 0.1002       |
| 222210010                      | $d(xz) \rightarrow \pi^*(2)$                                                     | 0.0302       |
| 221220100                      | $d(yz) \rightarrow \pi^*(1)$                                                     | 0.0213       |
| 222121000                      | $d(z^2) \rightarrow d(x^2-y^2)/C(sp^2)^*$                                        | 0.0190       |
| 022212100                      | $2x[d(x^2-y^2)/C(sp^2)] + d(xz) \rightarrow 2x[d(x^2-y^2)/C(sp^2)^*] + \pi^*(1)$ | 0.0137       |
| 222022000                      | $2x[d(z^2)] \rightarrow 2x[d(x^2-y^2)/C(sp^2)^*]$                                | 0.0118       |
| 221220001                      | $d(yz) \rightarrow \pi^*(3)$                                                     | 0.0117       |
| <b>Sum of CSS</b>              |                                                                                  | <b>60 %</b>  |
| <b>Sum of all MLCT</b>         |                                                                                  | <b>16 %</b>  |
| <b>Sum of all d-d</b>          |                                                                                  | <b>17 %</b>  |
| <b>Sum of mixed MLCT + d-d</b> |                                                                                  | <b>1 %</b>   |

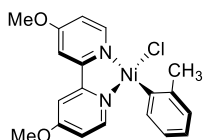

**1A** with Ni–C distance of 3.50 Å (dissociation limit) – CASSCF/NEVPT2 composition of the singlet ground state with CPCM(THF) (10e,8o Active Space) – 25 triplet roots, 15 singlet roots. Active Space Orbitals (in order for CI vector notation below):  $d(xy)$ ,  $d(yz)$ ,  $d(z^2)$ ,  $d(xz)$ ,  $d(x^2-y^2)/C(sp^2)$ ,  $d(x^2-y^2)/C(sp^2)^*$ ,  $\pi^*(1)$ ,  $\pi^*(2)$ .

| CI vector                      | Transition                                                                       | Contribution |
|--------------------------------|----------------------------------------------------------------------------------|--------------|
| 22211110                       | $d(xz) + d(x^2-y^2)/C(sp^2) \rightarrow d(x^2-y^2)/C(sp^2)^* + \pi^*(1)$         | 0.79242      |
| 22112110                       | $d(z^2) + d(xz) \rightarrow d(x^2-y^2)/C(sp^2)^* + \pi^*(1)$                     | 0.04955      |
| 11222110                       | $d(xy) + d(yz) \rightarrow d(x^2-y^2)/C(sp^2)^* + \pi^*(1)$                      | 0.03582      |
| 22221100                       | $d(x^2-y^2)/C(sp^2) \rightarrow d(x^2-y^2)/C(sp^2)^*$                            | 0.0304       |
| 22212010                       | $d(xz) \rightarrow \pi^*(1)$                                                     | 0.0279       |
| 21221110                       | $d(yz) + d(x^2-y^2)/C(sp^2) \rightarrow d(x^2-y^2)/C(sp^2)^* + \pi^*(1)$         | 0.02363      |
| 22210210                       | $2x[d(x^2-y^2)/C(sp^2)] + d(xz) \rightarrow 2x[d(x^2-y^2)/C(sp^2)^*] + \pi^*(1)$ | 0.01248      |
| 21122110                       | $d(yz) + d(z^2) \rightarrow d(x^2-y^2)/C(sp^2)^* + \pi^*(1)$                     | 0.01224      |
| <b>Sum of CSS</b>              |                                                                                  | <b>0 %</b>   |
| <b>Sum of all MLCT</b>         |                                                                                  | <b>3 %</b>   |
| <b>Sum of all d-d</b>          |                                                                                  | <b>3 %</b>   |
| <b>Sum of mixed MLCT + d-d</b> |                                                                                  | <b>93 %</b>  |

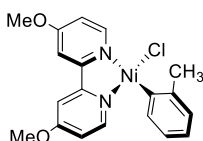

**1A** with Ni–C distance of 3.50 Å (dissociation limit) – CASSCF/QD-NEVPT2 composition of the singlet ground state with CPCM(THF) (10e,8o Active Space) – 25 triplet roots, 15 singlet roots. Active Space Orbitals (in order for CI vector notation below):  $d(xy)$ ,  $d(yz)$ ,  $d(z^2)$ ,  $d(xz)$ ,  $d(x^2-y^2)/C(sp^2)$ ,  $d(x^2-y^2)/C(sp^2)^*$ ,  $\pi^*(1)$ ,  $\pi^*(2)$ .

| CI vector                      | Transition                                                                       | Contribution |
|--------------------------------|----------------------------------------------------------------------------------|--------------|
| 22211110                       | $d(xz) + d(x^2-y^2)/C(sp^2) \rightarrow d(x^2-y^2)/C(sp^2)^* + \pi^*(1)$         | 0.7414       |
| 22112110                       | $d(z^2) + d(xz) \rightarrow d(x^2-y^2)/C(sp^2)^* + \pi^*(1)$                     | 0.0474       |
| 22211101                       | $d(xz) + d(x^2-y^2)/C(sp^2) \rightarrow d(x^2-y^2)/C(sp^2)^* + \pi^*(2)$         | 0.0440       |
| 22221100                       | $d(x^2-y^2)/C(sp^2) \rightarrow d(x^2-y^2)/C(sp^2)^*$                            | 0.0415       |
| 11222110                       | $d(xy) + d(yz) \rightarrow d(x^2-y^2)/C(sp^2)^* + \pi^*(1)$                      | 0.0298       |
| 22212010                       | $d(xz) \rightarrow \pi^*(1)$                                                     | 0.0278       |
| 21221110                       | $d(yz) + d(x^2-y^2)/C(sp^2) \rightarrow d(x^2-y^2)/C(sp^2)^* + \pi^*(1)$         | 0.0221       |
| 22210210                       | $2x[d(x^2-y^2)/C(sp^2)] + d(xz) \rightarrow 2x[d(x^2-y^2)/C(sp^2)^*] + \pi^*(1)$ | 0.0124       |
| 21122110                       | $d(z^2) + d(yz) \rightarrow d(x^2-y^2)/C(sp^2)^* + \pi^*(1)$                     | 0.0124       |
| <b>Sum of CSS</b>              |                                                                                  | <b>0 %</b>   |
| <b>Sum of all MLCT</b>         |                                                                                  | <b>3 %</b>   |
| <b>Sum of all d-d</b>          |                                                                                  | <b>4 %</b>   |
| <b>Sum of mixed MLCT + d-d</b> |                                                                                  | <b>91 %</b>  |

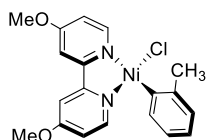

**1A** – CASSCF/NEVPT2 spin-orbit corrected absorption transitions for the CPCM(THF) phase spectrum (10e,9o Active Space) – 25 triplet roots, 15 singlet roots.

| <i>E</i> /nm | <i>E</i> /kcal mol <sup>-1</sup> | <i>f</i> <sub>osc</sub> | <i>E</i> /nm | <i>E</i> /kcal mol <sup>-1</sup> | <i>f</i> <sub>osc</sub> |
|--------------|----------------------------------|-------------------------|--------------|----------------------------------|-------------------------|
| 686.8        | 41.6                             | 0.0003382               | 415.8        | 68.8                             | 0.0001211               |
| 686.2        | 41.7                             | 0.0000000               | 415.7        | 68.8                             | 0.0002800               |
| 681.2        | 42.0                             | 0.0086796               | 406.4        | 70.3                             | 0.1124883               |
| 676.8        | 42.2                             | 0.0006769               | 377.1        | 75.8                             | 0.0000439               |
| 640.4        | 44.6                             | 0.0089455               | 376.9        | 75.9                             | 0.0000106               |
| 640.1        | 44.7                             | 0.0004318               | 376.8        | 75.9                             | 0.0041013               |
| 639.8        | 44.7                             | 0.0000016               | 372.8        | 76.7                             | 0.0127402               |
| 627.3        | 45.6                             | 0.0012483               | 358.7        | 79.7                             | 0.0086411               |
| 624.0        | 45.8                             | 0.0000010               | 357.8        | 79.9                             | 0.0002281               |
| 622.6        | 45.9                             | 0.0001089               | 357.8        | 79.9                             | 0.0000008               |
| 597.8        | 47.8                             | 0.1072861               | 357.3        | 80.0                             | 0.0050619               |
| 546.9        | 52.3                             | 0.1027241               | 337.0        | 84.8                             | 0.0516698               |
| 540.3        | 52.9                             | 0.0000011               | 336.3        | 85.0                             | 0.0027857               |
| 539.9        | 53.0                             | 0.0000255               | 335.5        | 85.2                             | 0.0000018               |
| 535.8        | 53.4                             | 0.1342252               | 332.4        | 86.0                             | 0.0000064               |
| 464.3        | 61.6                             | 0.0121830               | 331.8        | 86.2                             | 0.0000385               |
| 456.7        | 62.6                             | 0.0029026               | 329.5        | 86.8                             | 0.0000980               |
| 453.0        | 63.1                             | 0.0039897               | 328.9        | 86.9                             | 0.0000058               |
| 452.7        | 63.2                             | 0.0013175               | 328.8        | 86.9                             | 0.0002414               |
| 449.9        | 63.5                             | 0.0023967               | 328.2        | 87.1                             | 0.0002781               |
| 433.6        | 65.9                             | 0.0000562               | 323.0        | 88.5                             | 0.0000010               |
| 432.5        | 66.1                             | 0.0001662               | 321.3        | 89.0                             | 0.0000068               |
| 427.2        | 66.9                             | 0.0001554               | 316.7        | 90.3                             | 0.0000390               |
| 424.2        | 67.4                             | 0.0112704               | 316.2        | 90.4                             | 0.0000051               |
| 422.3        | 67.7                             | 0.0000786               | 314.9        | 90.8                             | 0.0000132               |
| 421.9        | 67.8                             | 0.0001214               | 305.4        | 93.6                             | 0.0000000               |
| 421.9        | 67.8                             | 0.0006037               | 305.3        | 93.6                             | 0.0000118               |
| 421.8        | 67.8                             | 0.0012560               | 305.2        | 93.7                             | 0.0001121               |



**1A** – CASSCF/QD-NEVPT2 spin-orbit corrected absorption transitions for the CPCM(THF) phase spectrum (10e,9o Active Space) – 25 triplet roots, 15 singlet roots.

| <i>E</i> /nm | <i>E</i> /kcal mol <sup>-1</sup> | <i>f</i> <sub>osc</sub> | <i>E</i> /nm | <i>E</i> /kcal mol <sup>-1</sup> | <i>f</i> <sub>osc</sub> |
|--------------|----------------------------------|-------------------------|--------------|----------------------------------|-------------------------|
| 681.5        | 42.0                             | 0.0000139               | 419.3        | 68.2                             | 0.0007890               |
| 681.2        | 42.0                             | 0.0011798               | 418.0        | 68.4                             | 0.0001416               |
| 676.3        | 42.3                             | 0.0003461               | 400.8        | 71.3                             | 0.1252700               |
| 674.6        | 42.4                             | 0.0046394               | 374.1        | 76.4                             | 0.0055795               |
| 666.6        | 42.9                             | 0.0000015               | 374.0        | 76.4                             | 0.0000359               |
| 663.1        | 43.1                             | 0.0005436               | 374.0        | 76.5                             | 0.0001227               |
| 662.3        | 43.2                             | 0.0006081               | 369.7        | 77.3                             | 0.0107469               |
| 617.1        | 46.3                             | 0.0368074               | 356.8        | 80.1                             | 0.0000034               |
| 615.4        | 46.5                             | 0.0000740               | 356.8        | 80.1                             | 0.0000878               |
| 614.1        | 46.6                             | 0.0001545               | 356.0        | 80.3                             | 0.0008873               |
| 594.0        | 48.1                             | 0.0594332               | 354.6        | 80.6                             | 0.0032993               |
| 539.6        | 53.0                             | 0.2023447               | 337.8        | 84.7                             | 0.0000227               |
| 534.2        | 53.5                             | 0.0000651               | 337.7        | 84.7                             | 0.0000062               |
| 533.8        | 53.6                             | 0.0000589               | 337.4        | 84.7                             | 0.0011136               |
| 530.8        | 53.9                             | 0.0631327               | 331.7        | 86.2                             | 0.0000101               |
| 473.3        | 60.4                             | 0.0001518               | 330.4        | 86.5                             | 0.0003428               |
| 460.7        | 62.1                             | 0.0012913               | 329.9        | 86.7                             | 0.0000081               |
| 458.3        | 62.4                             | 0.0000015               | 326.6        | 87.5                             | 0.0000077               |
| 457.9        | 62.4                             | 0.0001221               | 319.5        | 89.5                             | 0.0000301               |
| 453.6        | 63.0                             | 0.0076981               | 317.6        | 90.0                             | 0.0003420               |
| 452.0        | 63.2                             | 0.0078709               | 315.9        | 90.5                             | 0.0002084               |
| 444.8        | 64.3                             | 0.0019030               | 314.6        | 90.9                             | 0.0003474               |
| 438.6        | 65.2                             | 0.0039537               | 314.4        | 90.9                             | 0.0001153               |
| 421.7        | 67.8                             | 0.0002489               | 314.0        | 91.1                             | 0.0581782               |
| 420.3        | 68.0                             | 0.0004779               | 312.7        | 91.4                             | 0.0049695               |
| 420.2        | 68.0                             | 0.0001098               | 309.7        | 92.3                             | 0.0000072               |
| 420.1        | 68.1                             | 0.0013274               | 308.0        | 92.8                             | 0.0046242               |
| 419.8        | 68.1                             | 0.0000462               | 306.6        | 93.3                             | 0.0004543               |



**1A** – TD-DFT (B3LYP) absorption transitions (singlets only) for the CPCM(THF) phase spectrum.

| <i>E</i> /nm | <i>E</i> /kcal mol <sup>-1</sup> | <i>f</i> <sub>osc</sub> | <i>E</i> /nm | <i>E</i> /kcal mol <sup>-1</sup> | <i>f</i> <sub>osc</sub> |
|--------------|----------------------------------|-------------------------|--------------|----------------------------------|-------------------------|
| 796.2        | 35.9                             | 0.0000000               | 369.8        | 77.3                             | 0.0000000               |
| 601.6        | 47.5                             | 0.0000000               | 366.0        | 78.1                             | 0.0000000               |
| 593.1        | 48.2                             | 0.0000000               | 363.2        | 78.7                             | 0.0334601               |
| 547.0        | 52.3                             | 0.0004763               | 354.4        | 80.7                             | 0.0000200               |
| 543.4        | 52.6                             | 0.0000000               | 350.7        | 81.5                             | 0.0000000               |
| 510.0        | 56.1                             | 0.0000000               | 347.3        | 82.3                             | 0.0000000               |
| 509.6        | 56.1                             | 0.0045920               | 339.0        | 84.3                             | 0.0109995               |
| 507.5        | 56.3                             | 0.0023165               | 335.1        | 85.3                             | 0.0000000               |
| 499.5        | 57.2                             | 0.0003271               | 334.8        | 85.4                             | 0.0000000               |
| 487.2        | 58.7                             | 0.0238964               | 333.2        | 85.8                             | 0.0000780               |
| 460.4        | 62.1                             | 0.0000000               | 331.2        | 86.3                             | 0.0000636               |
| 459.0        | 62.3                             | 0.0000109               | 326.3        | 87.6                             | 0.0000000               |
| 458.5        | 62.4                             | 0.0000988               | 325.9        | 87.7                             | 0.0000000               |
| 457.7        | 62.5                             | 0.0001028               | 324.0        | 88.2                             | 0.0000000               |
| 453.4        | 63.1                             | 0.0000000               | 322.7        | 88.6                             | 0.0205495               |
| 436.0        | 65.6                             | 0.0481711               | 315.8        | 90.5                             | 0.0230876               |
| 435.2        | 65.7                             | 0.0001321               | 314.5        | 90.9                             | 0.0000000               |
| 433.3        | 66.0                             | 0.0000000               | 309.3        | 92.4                             | 0.0000000               |
| 416.5        | 68.6                             | 0.0000000               | 309.2        | 92.5                             | 0.0234382               |
| 412.8        | 69.3                             | 0.0004292               | 308.3        | 92.7                             | 0.0000000               |
| 386.6        | 74.0                             | 0.0000000               | 305.6        | 93.6                             | 0.0014940               |
| 376.1        | 76.0                             | 0.0011159               | 303.3        | 94.3                             | 0.0000000               |



**1A** – TD-DFT (B3LYP) absorption transitions (singlets only) for the CPCM(Toluene) phase spectrum.

| <i>E</i> /nm | <i>E</i> /kcal mol <sup>-1</sup> | <i>f</i> <sub>osc</sub> | <i>E</i> /nm | <i>E</i> /kcal mol <sup>-1</sup> | <i>f</i> <sub>osc</sub> |
|--------------|----------------------------------|-------------------------|--------------|----------------------------------|-------------------------|
| 778.8        | 36.7                             | 0.0000000               | 384.0        | 74.5                             | 0.0000000               |
| 689.5        | 41.5                             | 0.0000000               | 381.2        | 75.0                             | 0.0000000               |
| 667.9        | 42.8                             | 0.0005823               | 380.6        | 75.1                             | 0.0036244               |
| 635.8        | 45.0                             | 0.0000000               | 379.0        | 75.4                             | 0.0000402               |
| 601.4        | 47.5                             | 0.0000000               | 376.7        | 75.9                             | 0.0000000               |
| 592.7        | 48.2                             | 0.0000000               | 371.1        | 77.0                             | 0.0098058               |
| 566.0        | 50.5                             | 0.0010912               | 369.7        | 77.3                             | 0.0000000               |
| 541.2        | 52.8                             | 0.0000454               | 365.8        | 78.2                             | 0.0000000               |
| 526.1        | 54.3                             | 0.0000000               | 363.1        | 78.7                             | 0.0000468               |
| 525.9        | 54.4                             | 0.0125694               | 358.8        | 79.7                             | 0.0097666               |
| 515.8        | 55.4                             | 0.0000000               | 357.5        | 80.0                             | 0.0000000               |
| 509.8        | 56.1                             | 0.0001293               | 352.0        | 81.2                             | 0.0213813               |
| 493.4        | 57.9                             | 0.0000488               | 342.9        | 83.4                             | 0.0036857               |
| 492.1        | 58.1                             | 0.0110616               | 339.9        | 84.1                             | 0.0000000               |
| 480.6        | 59.5                             | 0.0438068               | 333.1        | 85.8                             | 0.0000000               |
| 466.5        | 61.3                             | 0.0000000               | 328.2        | 87.1                             | 0.0000000               |
| 461.8        | 61.9                             | 0.0003813               | 324.7        | 88.0                             | 0.0000000               |
| 459.5        | 62.2                             | 0.0067600               | 324.4        | 88.1                             | 0.0001110               |
| 456.2        | 62.7                             | 0.0009760               | 321.8        | 88.9                             | 0.0000000               |
| 436.0        | 65.6                             | 0.0000000               | 320.8        | 89.1                             | 0.0200202               |
| 425.4        | 67.2                             | 0.0008279               | 312.5        | 91.5                             | 0.0000000               |
| 424.2        | 67.4                             | 0.0000000               | 311.0        | 91.9                             | 0.0000000               |
| 408.3        | 70.0                             | 0.0000000               | 310.7        | 92.0                             | 0.0000000               |
| 400.8        | 71.3                             | 0.0391521               | 308.8        | 92.6                             | 0.0322492               |
| 387.5        | 73.8                             | 0.0000000               | 307.8        | 92.9                             | 0.0000000               |
| 386.8        | 73.9                             | 0.0000202               | 304.9        | 93.8                             | 0.0000000               |



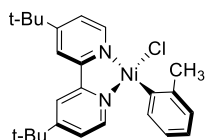

**1B** with Ni–C distance of 1.90 Å (near-equilibrium geometry) – CASSCF/NEVPT2 lowest transition energies with CPCM(THF) (10e,9o Active Space) – 25 triplet roots, 15 singlet roots. Active Space Orbitals (in order for CI vector notation below):  $d(x^2-y^2)/C(sp^2)$ ,  $d(xy)$ ,  $d(yz)$ ,  $d(z^2)$ ,  $d(xz)$ ,  $d(x^2-y^2)/C(sp^2)^*$ ,  $\pi^*(1)$ ,  $\pi^*(2)$ ,  $\pi^*(3)$ .

| State | Root | Multiplicity | $\Delta E/\text{nm}$ | $\Delta E/\text{kcal mol}^{-1}$ | CI vector | Contribution |
|-------|------|--------------|----------------------|---------------------------------|-----------|--------------|
| 0     | 0    | 1            | ---                  | ---                             | 222220000 | 0.5263       |
|       |      |              |                      |                                 | 222210100 | 0.2000       |
|       |      |              |                      |                                 | 122221000 | 0.1125       |
| 1     | 0    | 3            | 1073.8               | 26.6                            | 222121000 | 0.7657       |
|       |      |              |                      |                                 | 122122000 | 0.1649       |
| 2     | 1    | 3            | 926.7                | 30.9                            | 222211000 | 0.5430       |
|       |      |              |                      |                                 | 221221000 | 0.2407       |
|       |      |              |                      |                                 | 122212000 | 0.1175       |
| 3     | 2    | 3            | 856.1                | 33.4                            | 221221000 | 0.5192       |
|       |      |              |                      |                                 | 222211000 | 0.2513       |
| 4     | 3    | 3            | 699.9                | 40.8                            | 222120100 | 0.8070       |
| 5     | 1    | 1            | 683.8                | 41.8                            | 222120100 | 0.8050       |
| 6     | 4    | 3            | 649.4                | 44.0                            | 222210100 | 0.8234       |
| 7     | 5    | 3            | 645.0                | 44.3                            | 212221000 | 0.6920       |
|       |      |              |                      |                                 | 221212000 | 0.1407       |
|       |      |              |                      |                                 | 112222000 | 0.1057       |
| 8     | 2    | 1            | 611.3                | 46.8                            | 222210100 | 0.3738       |
|       |      |              |                      |                                 | 221220100 | 0.3715       |
| 9     | 3    | 1            | 563.8                | 50.7                            | 221220100 | 0.3777       |
|       |      |              |                      |                                 | 222210100 | 0.2185       |
|       |      |              |                      |                                 | 222220000 | 0.1004       |
| 10    | 6    | 3            | 559.1                | 51.1                            | 221220100 | 0.7851       |
| 11    | 4    | 1            | 468.0                | 61.1                            | 222121000 | 0.5333       |
|       |      |              |                      |                                 | 222210010 | 0.1498       |
| 12    | 5    | 1            | 460.9                | 62.0                            | 222211000 | 0.7581       |
|       |      |              |                      |                                 | 122212000 | 0.1073       |
| 13    | 6    | 1            | 458.4                | 62.4                            | 212220100 | 0.5696       |
|       |      |              |                      |                                 | 221221000 | 0.1206       |
|       |      |              |                      |                                 | 221211100 | 0.1058       |
| 14    | 7    | 1            | 445.9                | 64.1                            | 212221000 | 0.6046       |
|       |      |              |                      |                                 | 222210010 | 0.1258       |
| 15    | 7    | 3            | 443.2                | 64.5                            | 222120010 | 0.7986       |
| 16    | 8    | 1            | 441.8                | 64.7                            | 222120010 | 0.7990       |
| 17    | 8    | 3            | 433.5                | 66.0                            | 212220100 | 0.7368       |
| 18    | 9    | 1            | 427.9                | 66.8                            | 221221000 | 0.6046       |
|       |      |              |                      |                                 | 212220100 | 0.1303       |
| 19    | 9    | 3            | 425.9                | 67.1                            | 222210010 | 0.8159       |
| 20    | 10   | 1            | 420.2                | 68.0                            | 222210010 | 0.4162       |
|       |      |              |                      |                                 | 222121000 | 0.1682       |



**1B** with Ni–C distance of 1.90 Å (near-equilibrium geometry) – CASSCF/QD-NEVPT2 lowest transition energies with CPCM(THF) (10e,9o Active Space) – 25 triplet roots, 15 singlet roots. Active Space Orbitals (in order for CI vector notation below):  $d(x^2-y^2)/C(sp^2)$ ,  $d(xy)$ ,  $d(yz)$ ,  $d(z^2)$ ,  $d(xz)$ ,  $d(x^2-y^2)/C(sp^2)^*$ ,  $\pi^*(1)$ ,  $\pi^*(2)$ ,  $\pi^*(3)$ .

| State | Root | Multiplicity | $\Delta E/\text{nm}$ | $\Delta E/\text{kcal mol}^{-1}$ | CI vector | Contribution |
|-------|------|--------------|----------------------|---------------------------------|-----------|--------------|
| 0     | 0    | 1            | ---                  | ---                             | 222220000 | 0.5854       |
|       |      |              |                      |                                 | 122221000 | 0.1300       |
|       |      |              |                      |                                 | 222210100 | 0.1187       |
| 1     | 0    | 3            | 1043.4               | 27.4                            | 222121000 | 0.7528       |
|       |      |              |                      |                                 | 122122000 | 0.1594       |
| 2     | 1    | 3            | 909.7                | 31.4                            | 222211000 | 0.6100       |
|       |      |              |                      |                                 | 221221000 | 0.1675       |
|       |      |              |                      |                                 | 122212000 | 0.1319       |
| 3     | 2    | 3            | 835.7                | 34.2                            | 221221000 | 0.5825       |
|       |      |              |                      |                                 | 222211000 | 0.1804       |
| 4     | 3    | 3            | 686.3                | 41.7                            | 222120100 | 0.8000       |
| 5     | 1    | 1            | 670.5                | 42.6                            | 222120100 | 0.7993       |
| 6     | 4    | 3            | 659.6                | 43.3                            | 212221000 | 0.7139       |
| 7     | 5    | 3            | 637.4                | 44.9                            | 222210100 | 0.8206       |
| 8     | 2    | 1            | 600.4                | 47.6                            | 222210100 | 0.5392       |
|       |      |              |                      |                                 | 221220100 | 0.1857       |
| 9     | 3    | 1            | 548.8                | 52.1                            | 221220100 | 0.5544       |
|       |      |              |                      |                                 | 222210100 | 0.1064       |
| 10    | 6    | 3            | 548.2                | 52.2                            | 221220100 | 0.7675       |
| 11    | 4    | 1            | 463.2                | 61.7                            | 222121000 | 0.3871       |
|       |      |              |                      |                                 | 222210010 | 0.3414       |
| 12    | 5    | 1            | 456.7                | 62.6                            | 222211000 | 0.7259       |
| 13    | 6    | 1            | 451.1                | 63.4                            | 212220100 | 0.6723       |
| 14    | 7    | 1            | 439.1                | 65.1                            | 212221000 | 0.5952       |
| 15    | 7    | 3            | 437.8                | 65.3                            | 222120010 | 0.7832       |
| 16    | 8    | 1            | 435.6                | 65.6                            | 222120010 | 0.7792       |
| 17    | 8    | 3            | 427.1                | 66.9                            | 212220100 | 0.7288       |
| 18    | 9    | 1            | 423.4                | 67.5                            | 221221000 | 0.3894       |
|       |      |              |                      |                                 | 222121000 | 0.1515       |
|       |      |              |                      |                                 | 222210010 | 0.1413       |
| 19    | 9    | 3            | 420.6                | 68.0                            | 222210010 | 0.8108       |
| 20    | 10   | 1            | 411.4                | 69.5                            | 221221000 | 0.3519       |
|       |      |              |                      |                                 | 222121000 | 0.1524       |
|       |      |              |                      |                                 | 212221000 | 0.1012       |



**1B** with Ni–C distance of 3.50 Å (dissociation limit) – CASSCF/NEVPT2 lowest transition energies with CPCM(THF) (10e,8o Active Space) – 25 triplet roots, 15 singlet roots. Active Space Orbitals (in order for CI vector notation below): d(xy), d(yz), d(z<sup>2</sup>), d(xz), d(x<sup>2</sup>-y<sup>2</sup>)/C(sp<sup>2</sup>), d(x<sup>2</sup>-y<sup>2</sup>)/C(sp<sup>2</sup>)\*, π\*(1), π\*(2).

| State | Root | Multiplicity | ΔE/nm   | ΔE/kcal mol <sup>-1</sup> | CI vector | Contribution |
|-------|------|--------------|---------|---------------------------|-----------|--------------|
| 0     | 0    | 1            | ---     | ---                       | 22211110  | 0.7753       |
| 1     | 0    | 3            | 44365.5 | 0.6                       | 22211110  | 0.8102       |
| 2     | 1    | 3            | 8375.6  | 3.4                       | 22121110  | 0.9222       |
| 3     | 1    | 1            | 6595.7  | 4.3                       | 22121110  | 0.9206       |
| 4     | 2    | 3            | 5824.3  | 4.9                       | 22121110  | 0.9621       |
| 5     | 3    | 3            | 4895.1  | 5.8                       | 22211110  | 0.8443       |
| 6     | 4    | 3            | 3542.5  | 8.1                       | 21221110  | 0.8788       |
| 7     | 2    | 1            | 3398.0  | 8.4                       | 21221110  | 0.8394       |
| 8     | 5    | 3            | 3191.8  | 9.0                       | 21221110  | 0.8784       |
| 9     | 3    | 1            | 1396.4  | 20.5                      | 21212110  | 0.4735       |
|       |      |              |         |                           | 12221110  | 0.4489       |
| 10    | 6    | 3            | 1377.1  | 20.8                      | 21212110  | 0.4787       |
|       |      |              |         |                           | 12221110  | 0.4626       |
| 11    | 7    | 3            | 1263.4  | 22.6                      | 12221110  | 0.4850       |
|       |      |              |         |                           | 21212110  | 0.4500       |
| 12    | 4    | 1            | 1236.5  | 23.1                      | 22211101  | 0.7848       |
| 13    | 8    | 3            | 1205.6  | 23.7                      | 22211101  | 0.8134       |
| 14    | 9    | 3            | 1183.1  | 24.2                      | 22121101  | 0.9152       |
| 15    | 5    | 1            | 1181.4  | 24.2                      | 22121101  | 0.8942       |
| 16    | 10   | 3            | 1162.5  | 24.6                      | 22220110  | 0.8295       |
| 17    | 6    | 1            | 1159.7  | 24.7                      | 22220110  | 0.8229       |
| 18    | 11   | 3            | 1151.5  | 24.8                      | 22121101  | 0.9347       |
| 19    | 12   | 3            | 1093.9  | 26.1                      | 22211101  | 0.8438       |
| 20    | 7    | 1            | 990.4   | 28.9                      | 12212110  | 0.7903       |
|       |      |              |         |                           | 21122110  | 0.1171       |



**1B** with Ni–C distance of 3.50 Å (dissociation limit) – CASSCF/QD-NEVPT2 lowest transition energies with CPCM(THF) (10e,8o Active Space) – 25 triplet roots, 15 singlet roots. Active Space Orbitals (in order for CI vector notation below): d(xy), d(yz), d(z<sup>2</sup>), d(xz), d(x<sup>2</sup>-y<sup>2</sup>)/C(sp<sup>2</sup>), d(x<sup>2</sup>-y<sup>2</sup>)/C(sp<sup>2</sup>)\*, π\*(1), π\*(2).

| State | Root | Multiplicity | ΔE/nm   | ΔE/kcal mol <sup>-1</sup> | CI vector | Contribution |
|-------|------|--------------|---------|---------------------------|-----------|--------------|
| 0     | 0    | 1            | ---     | ---                       | 22211110  | 0.7381       |
| 1     | 0    | 3            | 40650.4 | 0.7                       | 22211110  | 0.7773       |
| 2     | 1    | 3            | 7266.9  | 3.9                       | 22121110  | 0.9208       |
| 3     | 1    | 1            | 5892.1  | 4.9                       | 22121110  | 0.9199       |
| 4     | 2    | 3            | 5263.4  | 5.4                       | 22121110  | 0.9624       |
| 5     | 3    | 3            | 4501.5  | 6.4                       | 22211110  | 0.8443       |
| 6     | 4    | 3            | 3328.3  | 8.6                       | 21221110  | 0.8798       |
| 7     | 2    | 1            | 3205.3  | 8.9                       | 21221110  | 0.8317       |
| 8     | 5    | 3            | 3018.7  | 9.5                       | 21221110  | 0.8744       |
| 9     | 3    | 1            | 1364.6  | 21.0                      | 21212110  | 0.4795       |
|       |      |              |         |                           | 12221110  | 0.4422       |
| 10    | 6    | 3            | 1345.5  | 21.2                      | 21212110  | 0.4877       |
|       |      |              |         |                           | 12221110  | 0.4573       |
| 11    | 7    | 3            | 1237.5  | 23.1                      | 12221110  | 0.4797       |
|       |      |              |         |                           | 21212110  | 0.4539       |
| 12    | 4    | 1            | 1199.7  | 23.8                      | 22211101  | 0.7526       |
| 13    | 8    | 3            | 1172.5  | 24.4                      | 22211101  | 0.7641       |
| 14    | 9    | 3            | 1158.0  | 24.7                      | 22121101  | 0.8987       |
| 15    | 5    | 1            | 1152.5  | 24.8                      | 22121101  | 0.8501       |
| 16    | 10   | 3            | 1139.3  | 25.1                      | 22220110  | 0.7711       |
| 17    | 6    | 1            | 1137.7  | 25.1                      | 22220110  | 0.7868       |
| 18    | 11   | 3            | 1122.1  | 25.5                      | 22121101  | 0.9029       |
| 19    | 12   | 3            | 1072.2  | 26.7                      | 22211101  | 0.8448       |
| 20    | 7    | 1            | 999.6   | 28.6                      | 12212110  | 0.4761       |
|       |      |              |         |                           | 21221101  | 0.3318       |

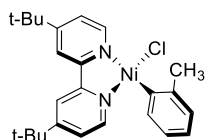

**1B** with Ni–C distance of 1.90 Å (near-equilibrium geometry) – CASSCF/NEVPT2 composition of the singlet ground state with CPCM(THF) (10e,9o Active Space) – 25 triplet roots, 15 singlet roots. Active Space Orbitals (in order for CI vector notation below):  $d(x^2-y^2)/C(sp^2)$ ,  $d(xy)$ ,  $d(yz)$ ,  $d(z^2)$ ,  $d(xz)$ ,  $d(x^2-y^2)/C(sp^2)^*$ ,  $\pi^*(1)$ ,  $\pi^*(2)$ ,  $\pi^*(3)$ .

| CI vector                      | Transition                                                                       | Contribution |
|--------------------------------|----------------------------------------------------------------------------------|--------------|
| 222220000                      | Closed-shell singlet (CSS) $d^8$                                                 | 0.5263       |
| 222210100                      | $d(xz) \rightarrow \pi^*(1)$                                                     | 0.2000       |
| 122221000                      | $d(x^2-y^2)/C(sp^2) \rightarrow d(x^2-y^2)/C(sp^2)^*$                            | 0.1125       |
| 221220100                      | $d(xy) \rightarrow \pi^*(1)$                                                     | 0.0305       |
| 022212100                      | $2x[d(x^2-y^2)/C(sp^2)] + d(xz) \rightarrow 2x[d(x^2-y^2)/C(sp^2)^*] + \pi^*(1)$ | 0.0269       |
| 222210010                      | $d(xz) \rightarrow \pi^*(2)$                                                     | 0.0140       |
| 221220001                      | $d(yz) \rightarrow \pi^*(3)$                                                     | 0.0115       |
| 122211100                      | $d(x^2-y^2)/C(sp^2) + d(xz) \rightarrow d(x^2-y^2)/C(sp^2)^* + \pi^*(1)$         | 0.0102       |
| <b>Sum of CSS</b>              |                                                                                  | <b>53 %</b>  |
| <b>Sum of all MLCT</b>         |                                                                                  | <b>26 %</b>  |
| <b>Sum of all d-d</b>          |                                                                                  | <b>11 %</b>  |
| <b>Sum of mixed MLCT + d-d</b> |                                                                                  | <b>4 %</b>   |

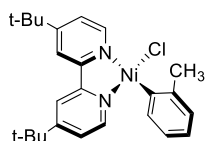

**1B** with Ni–C distance of 1.90 Å (near-equilibrium geometry) – CASSCF/QD-NEVPT2 composition of the singlet ground state with CPCM(THF) (10e,9o Active Space) – 25 triplet roots, 15 singlet roots. Active Space Orbitals (in order for CI vector notation below):  $d(x^2-y^2)/C(sp^2)$ ,  $d(xy)$ ,  $d(yz)$ ,  $d(z^2)$ ,  $d(xz)$ ,  $d(x^2-y^2)/C(sp^2)^*$ ,  $\pi^*(1)$ ,  $\pi^*(2)$ ,  $\pi^*(3)$ .

| CI vector                      | Transition                                                                       | Contribution |
|--------------------------------|----------------------------------------------------------------------------------|--------------|
| 222220000                      | Closed-shell singlet (CSS) $d^8$                                                 | 0.5854       |
| 122221000                      | $d(x^2-y^2)/C(sp^2) \rightarrow d(x^2-y^2)/C(sp^2)^*$                            | 0.1300       |
| 222210100                      | $d(xz) \rightarrow \pi^*(1)$                                                     | 0.1187       |
| 221220100                      | $d(yz) \rightarrow \pi^*(1)$                                                     | 0.0223       |
| 222210010                      | $d(xz) \rightarrow \pi^*(2)$                                                     | 0.0206       |
| 222121000                      | $d(z^2) \rightarrow d(x^2-y^2)/C(sp^2)^*$                                        | 0.0194       |
| 022212100                      | $2x[d(x^2-y^2)/C(sp^2)] + d(xz) \rightarrow 2x[d(x^2-y^2)/C(sp^2)^*] + \pi^*(1)$ | 0.0165       |
| 221220001                      | $d(yz) \rightarrow \pi^*(3)$                                                     | 0.0143       |
| 222022000                      | $2x[d(z^2)] \rightarrow 2x[d(x^2-y^2)/C(sp^2)^*]$                                | 0.0107       |
| <b>Sum of CSS</b>              |                                                                                  | <b>58 %</b>  |
| <b>Sum of all MLCT</b>         |                                                                                  | <b>18 %</b>  |
| <b>Sum of all d-d</b>          |                                                                                  | <b>16 %</b>  |
| <b>Sum of mixed MLCT + d-d</b> |                                                                                  | <b>2 %</b>   |



**1B** with Ni–C distance of 3.50 Å (dissociation limit) – CASSCF/NEVPT2 composition of the singlet ground state with CPCM(THF) (10e,8o Active Space) – 25 triplet roots, 15 singlet roots. Active Space Orbitals (in order for CI vector notation below):  $d(xy)$ ,  $d(yz)$ ,  $d(z^2)$ ,  $d(xz)$ ,  $d(x^2-y^2)/C(sp^2)$ ,  $d(x^2-y^2)/C(sp^2)^*$ ,  $\pi^*(1)$ ,  $\pi^*(2)$ .

| CI vector                      | Transition                                                                       | Contribution |
|--------------------------------|----------------------------------------------------------------------------------|--------------|
| 22211110                       | $d(xz) + d(x^2-y^2)/C(sp^2) \rightarrow d(x^2-y^2)/C(sp^2)^* + \pi^*(1)$         | 0.7753       |
| 22112110                       | $d(z^2) + d(xz) \rightarrow d(x^2-y^2)/C(sp^2)^* + \pi^*(1)$                     | 0.0561       |
| 22221100                       | $d(x^2-y^2)/C(sp^2) \rightarrow d(x^2-y^2)/C(sp^2)^*$                            | 0.0407       |
| 11222110                       | $d(xy) + d(yz) \rightarrow d(x^2-y^2)/C(sp^2)^* + \pi^*(1)$                      | 0.0342       |
| 21221110                       | $d(yz) + d(x^2-y^2)/C(sp^2) \rightarrow d(x^2-y^2)/C(sp^2)^* + \pi^*(1)$         | 0.0300       |
| 22212010                       | $d(xz) \rightarrow \pi^*(1)$                                                     | 0.0273       |
| 22210210                       | $2x[d(x^2-y^2)/C(sp^2)] + d(xz) \rightarrow 2x[d(x^2-y^2)/C(sp^2)^*] + \pi^*(1)$ | 0.0121       |
| <b>Sum of CSS</b>              |                                                                                  | <b>0 %</b>   |
| <b>Sum of all MLCT</b>         |                                                                                  | <b>3 %</b>   |
| <b>Sum of all d-d</b>          |                                                                                  | <b>4 %</b>   |
| <b>Sum of mixed MLCT + d-d</b> |                                                                                  | <b>91 %</b>  |

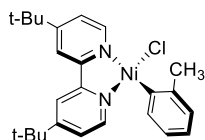

**1B** with Ni–C distance of 3.50 Å (dissociation limit) – CASSCF/QD-NEVPT2 composition of the singlet ground state with CPCM(THF) (10e,8o Active Space) – 25 triplet roots, 15 singlet roots. Active Space Orbitals (in order for CI vector notation below):  $d(xy)$ ,  $d(yz)$ ,  $d(z^2)$ ,  $d(xz)$ ,  $d(x^2-y^2)/C(sp^2)$ ,  $d(x^2-y^2)/C(sp^2)^*$ ,  $\pi^*(1)$ ,  $\pi^*(2)$ .

| CI vector                      | Transition                                                                       | Contribution |
|--------------------------------|----------------------------------------------------------------------------------|--------------|
| 22211110                       | $d(xz) + d(x^2-y^2)/C(sp^2) \rightarrow d(x^2-y^2)/C(sp^2)^* + \pi^*(1)$         | 0.7381       |
| 22112110                       | $d(z^2) + d(xz) \rightarrow d(x^2-y^2)/C(sp^2)^* + \pi^*(1)$                     | 0.0545       |
| 22221100                       | $d(x^2-y^2)/C(sp^2) \rightarrow d(x^2-y^2)/C(sp^2)^*$                            | 0.0495       |
| 21221110                       | $d(yz) + d(x^2-y^2)/C(sp^2) \rightarrow d(x^2-y^2)/C(sp^2)^* + \pi^*(1)$         | 0.0335       |
| 11222110                       | $d(xy) + d(yz) \rightarrow d(x^2-y^2)/C(sp^2)^* + \pi^*(1)$                      | 0.0289       |
| 22212010                       | $d(xz) \rightarrow \pi^*(1)$                                                     | 0.0278       |
| 22211101                       | $d(xz) + d(x^2-y^2)/C(sp^2) \rightarrow d(x^2-y^2)/C(sp^2)^* + \pi^*(2)$         | 0.0270       |
| 22210210                       | $2x[d(x^2-y^2)/C(sp^2)] + d(xz) \rightarrow 2x[d(x^2-y^2)/C(sp^2)^*] + \pi^*(1)$ | 0.0123       |
| <b>Sum of CSS</b>              |                                                                                  | <b>0 %</b>   |
| <b>Sum of all MLCT</b>         |                                                                                  | <b>3 %</b>   |
| <b>Sum of all d-d</b>          |                                                                                  | <b>5 %</b>   |
| <b>Sum of mixed MLCT + d-d</b> |                                                                                  | <b>89 %</b>  |



**1B** – CASSCF/NEVPT2 spin-orbit corrected absorption transitions for the CPCM(THF) phase spectrum (10e,9o Active Space) – 25 triplet roots, 15 singlet roots.

| <i>E</i> /nm | <i>E</i> /kcal mol <sup>-1</sup> | <i>f</i> <sub>osc</sub> | <i>E</i> /nm | <i>E</i> /kcal mol <sup>-1</sup> | <i>f</i> <sub>osc</sub> |
|--------------|----------------------------------|-------------------------|--------------|----------------------------------|-------------------------|
| 710.7        | 40.2                             | 0.0001760               | 378.0        | 75.6                             | 0.0000215               |
| 710.2        | 40.3                             | 0.0000000               | 376.3        | 76.0                             | 0.0030826               |
| 703.7        | 40.6                             | 0.0057933               | 374.3        | 76.4                             | 0.0167253               |
| 696.9        | 41.0                             | 0.0012136               | 372.8        | 76.7                             | 0.0143256               |
| 645.7        | 44.3                             | 0.0015823               | 372.2        | 76.8                             | 0.0000068               |
| 643.7        | 44.4                             | 0.0000032               | 371.7        | 76.9                             | 0.0107965               |
| 642.6        | 44.5                             | 0.0000901               | 351.4        | 81.4                             | 0.0886074               |
| 641.9        | 44.5                             | 0.0121354               | 329.7        | 86.7                             | 0.0000034               |
| 640.2        | 44.7                             | 0.0000188               | 328.5        | 87.0                             | 0.0000001               |
| 639.2        | 44.7                             | 0.0001567               | 326.6        | 87.6                             | 0.0000001               |
| 603.2        | 47.4                             | 0.0821178               | 320.2        | 89.3                             | 0.0012580               |
| 563.1        | 50.8                             | 0.1484097               | 318.4        | 89.8                             | 0.0000561               |
| 552.9        | 51.7                             | 0.0000004               | 318.2        | 89.9                             | 0.0000033               |
| 552.4        | 51.8                             | 0.0000597               | 317.4        | 90.1                             | 0.0000115               |
| 547.9        | 52.2                             | 0.1227978               | 317.4        | 90.1                             | 0.0000408               |
| 467.6        | 61.1                             | 0.0294280               | 317.2        | 90.1                             | 0.0001033               |
| 459.5        | 62.2                             | 0.0000697               | 315.2        | 90.7                             | 0.0000021               |
| 456.3        | 62.7                             | 0.0001367               | 314.6        | 90.9                             | 0.0000698               |
| 448.8        | 63.7                             | 0.0114377               | 314.5        | 90.9                             | 0.0000388               |
| 447.8        | 63.9                             | 0.0000029               | 314.4        | 91.0                             | 0.0001298               |
| 447.5        | 63.9                             | 0.0039026               | 313.2        | 91.3                             | 0.0000240               |
| 446.6        | 64.0                             | 0.0006564               | 311.7        | 91.7                             | 0.0000050               |
| 440.9        | 64.8                             | 0.0005965               | 309.1        | 92.5                             | 0.0000163               |
| 431.5        | 66.3                             | 0.0000038               | 378.0        | 75.6                             | 0.0000215               |
| 431.5        | 66.3                             | 0.0006481               | 376.3        | 76.0                             | 0.0030826               |
| 431.3        | 66.3                             | 0.0003916               | 374.3        | 76.4                             | 0.0167253               |
| 426.8        | 67.0                             | 0.0061101               | 372.8        | 76.7                             | 0.0143256               |
| 422.0        | 67.8                             | 0.0006958               | 372.2        | 76.8                             | 0.0000068               |
| 421.9        | 67.8                             | 0.0001128               | 371.7        | 76.9                             | 0.0107965               |
| 421.8        | 67.8                             | 0.0013979               | 351.4        | 81.4                             | 0.0886074               |
| 418.2        | 68.4                             | 0.0947208               | 329.7        | 86.7                             | 0.0000034               |
| 378.2        | 75.6                             | 0.0019854               | 328.5        | 87.0                             | 0.0000001               |
| 378.0        | 75.6                             | 0.0000405               | 326.6        | 87.6                             | 0.0000001               |



**1B** – CASSCF/QD-NEVPT2 spin-orbit corrected absorption transitions for the CPCM(THF) phase spectrum (10e,9o Active Space) – 25 triplet roots, 15 singlet roots.

| <i>E</i> /nm | <i>E</i> /kcal mol <sup>-1</sup> | <i>f</i> <sub>osc</sub> | <i>E</i> /nm | <i>E</i> /kcal mol <sup>-1</sup> | <i>f</i> <sub>osc</sub> |
|--------------|----------------------------------|-------------------------|--------------|----------------------------------|-------------------------|
| 696.1        | 41.1                             | 0.0001416               | 416.5        | 68.6                             | 0.0000408               |
| 696.0        | 41.1                             | 0.0000002               | 416.3        | 68.7                             | 0.0004648               |
| 691.0        | 41.4                             | 0.0051942               | 410.1        | 69.7                             | 0.0923703               |
| 682.8        | 41.9                             | 0.0013330               | 373.7        | 76.5                             | 0.0002387               |
| 656.1        | 43.6                             | 0.0000216               | 373.5        | 76.6                             | 0.0006092               |
| 655.2        | 43.6                             | 0.0000138               | 373.4        | 76.6                             | 0.0004617               |
| 652.4        | 43.8                             | 0.0004268               | 372.7        | 76.7                             | 0.0008966               |
| 631.7        | 45.3                             | 0.0013541               | 372.1        | 76.8                             | 0.0005703               |
| 630.2        | 45.4                             | 0.0000641               | 371.9        | 76.9                             | 0.0031336               |
| 628.3        | 45.5                             | 0.0002382               | 371.5        | 77.0                             | 0.0023907               |
| 596.2        | 48.0                             | 0.0881912               | 367.4        | 77.8                             | 0.0182278               |
| 547.5        | 52.2                             | 0.1407730               | 349.5        | 81.8                             | 0.0005362               |
| 542.3        | 52.7                             | 0.0001741               | 349.5        | 81.8                             | 0.0000559               |
| 541.8        | 52.8                             | 0.0000716               | 349.2        | 81.9                             | 0.0043313               |
| 538.2        | 53.1                             | 0.1478686               | 343.6        | 83.2                             | 0.0014779               |
| 464.1        | 61.6                             | 0.0000794               | 326.4        | 87.6                             | 0.0000252               |
| 455.0        | 62.8                             | 0.0004961               | 325.7        | 87.8                             | 0.0000043               |
| 448.9        | 63.7                             | 0.0257590               | 322.6        | 88.6                             | 0.0000053               |
| 442.2        | 64.7                             | 0.0021120               | 320.5        | 89.2                             | 0.0000192               |
| 442.0        | 64.7                             | 0.0000154               | 320.2        | 89.3                             | 0.0001464               |
| 440.6        | 64.9                             | 0.0094372               | 320.1        | 89.3                             | 0.0000017               |
| 440.1        | 65.0                             | 0.0001729               | 316.0        | 90.5                             | 0.0233363               |
| 434.3        | 65.8                             | 0.0048184               | 315.9        | 90.5                             | 0.0846200               |
| 425.3        | 67.2                             | 0.0003825               | 314.5        | 90.9                             | 0.0000103               |
| 425.2        | 67.2                             | 0.0004524               | 310.5        | 92.1                             | 0.0033691               |
| 425.0        | 67.3                             | 0.0015977               | 309.4        | 92.4                             | 0.0006259               |
| 421.6        | 67.8                             | 0.0166611               | 307.2        | 93.1                             | 0.0039749               |
| 416.7        | 68.6                             | 0.0001628               | 305.0        | 93.7                             | 0.0001600               |





**1B** – TD-DFT (B3LYP) absorption transitions (singlets only) for the CPCM(THF) phase spectrum.

| <i>E</i> /nm | <i>E</i> /kcal mol <sup>-1</sup> | <i>f</i> <sub>osc</sub> | <i>E</i> /nm | <i>E</i> /kcal mol <sup>-1</sup> | <i>f</i> <sub>osc</sub> |
|--------------|----------------------------------|-------------------------|--------------|----------------------------------|-------------------------|
| 775.3        | 36.9                             | 0.0000000               | 372.8        | 76.7                             | 0.0000000               |
| 601.5        | 47.5                             | 0.0000000               | 369.5        | 77.4                             | 0.0000197               |
| 596.9        | 47.9                             | 0.0000000               | 367.1        | 77.9                             | 0.0225168               |
| 553.3        | 51.7                             | 0.0000000               | 362.8        | 78.8                             | 0.0000000               |
| 544.3        | 52.5                             | 0.0010155               | 361.6        | 79.1                             | 0.0000000               |
| 513.4        | 55.7                             | 0.0000000               | 341.5        | 83.7                             | 0.0212826               |
| 510.0        | 56.1                             | 0.0016531               | 336.0        | 85.1                             | 0.0000528               |
| 508.7        | 56.2                             | 0.0066485               | 335.2        | 85.3                             | 0.0004584               |
| 489.9        | 58.4                             | 0.0000711               | 334.0        | 85.6                             | 0.0280974               |
| 474.5        | 60.3                             | 0.0231506               | 333.8        | 85.7                             | 0.0000000               |
| 466.0        | 61.4                             | 0.0000000               | 333.6        | 85.7                             | 0.0000000               |
| 462.2        | 61.9                             | 0.0005945               | 332.9        | 85.9                             | 0.0000000               |
| 460.2        | 62.1                             | 0.0000000               | 331.4        | 86.3                             | 0.0061857               |
| 456.2        | 62.7                             | 0.0001044               | 331.3        | 86.3                             | 0.0000000               |
| 454.0        | 63.0                             | 0.0001171               | 331.0        | 86.4                             | 0.0000000               |
| 443.9        | 64.4                             | 0.0000000               | 326.5        | 87.6                             | 0.0090909               |
| 436.8        | 65.5                             | 0.0003876               | 326.1        | 87.7                             | 0.0002664               |
| 432.6        | 66.1                             | 0.0640219               | 310.1        | 92.2                             | 0.0000000               |
| 416.9        | 68.6                             | 0.0000000               | 310.0        | 92.2                             | 0.0000000               |
| 414.6        | 69.0                             | 0.0002552               | 308.7        | 92.6                             | 0.0000000               |
| 391.4        | 73.0                             | 0.0000000               | 303.0        | 94.4                             | 0.0000000               |
| 385.0        | 74.3                             | 0.0003950               | 302.6        | 94.5                             | 0.0033161               |
| 379.7        | 75.3                             | 0.0000000               | 302.2        | 94.6                             | 0.0000000               |



**1B** – TD-DFT (B3LYP) absorption transitions (singlets only) for the CPCM(Toluene) phase spectrum.

| <i>E</i> /nm | <i>E</i> /kcal mol <sup>-1</sup> | <i>f</i> <sub>osc</sub> | <i>E</i> /nm | <i>E</i> /kcal mol <sup>-1</sup> | <i>f</i> <sub>osc</sub> |
|--------------|----------------------------------|-------------------------|--------------|----------------------------------|-------------------------|
| 756.9        | 37.8                             | 0.0000000               | 396.1        | 72.2                             | 0.0004180               |
| 692.3        | 41.3                             | 0.0000000               | 388.9        | 73.5                             | 0.0000000               |
| 666.9        | 42.9                             | 0.0006802               | 388.0        | 73.7                             | 0.0033031               |
| 642.9        | 44.5                             | 0.0000000               | 383.5        | 74.5                             | 0.0000299               |
| 596.1        | 48.0                             | 0.0000000               | 382.3        | 74.8                             | 0.0000000               |
| 580.8        | 49.2                             | 0.0000000               | 379.5        | 75.3                             | 0.0000000               |
| 540.6        | 52.9                             | 0.0003625               | 378.8        | 75.5                             | 0.0000000               |
| 531.6        | 53.8                             | 0.0164318               | 376.9        | 75.9                             | 0.0000000               |
| 526.1        | 54.4                             | 0.0000000               | 370.5        | 77.2                             | 0.0136672               |
| 521.9        | 54.8                             | 0.0000000               | 369.4        | 77.4                             | 0.0000000               |
| 493.6        | 57.9                             | 0.0018742               | 369.1        | 77.5                             | 0.0000000               |
| 487.7        | 58.6                             | 0.0000498               | 366.2        | 78.1                             | 0.0035020               |
| 475.6        | 60.1                             | 0.0023270               | 364.3        | 78.5                             | 0.0214867               |
| 474.2        | 60.3                             | 0.0068798               | 364.1        | 78.5                             | 0.0000757               |
| 472.4        | 60.5                             | 0.0583785               | 339.2        | 84.3                             | 0.0000000               |
| 472.2        | 60.6                             | 0.0008972               | 338.1        | 84.6                             | 0.0010193               |
| 462.5        | 61.8                             | 0.0000000               | 322.5        | 88.6                             | 0.0000000               |
| 461.5        | 62.0                             | 0.0002323               | 321.2        | 89.0                             | 0.0000000               |
| 456.5        | 62.6                             | 0.0079188               | 318.1        | 89.9                             | 0.0000000               |
| 447.1        | 64.0                             | 0.0000000               | 316.0        | 90.5                             | 0.0000000               |
| 437.0        | 65.4                             | 0.0002701               | 315.5        | 90.6                             | 0.0144091               |
| 436.1        | 65.6                             | 0.0000000               | 315.1        | 90.7                             | 0.0000000               |
| 414.4        | 69.0                             | 0.0000000               | 311.5        | 91.8                             | 0.0000000               |
| 406.7        | 70.3                             | 0.0262452               | 307.2        | 93.1                             | 0.0000000               |
| 405.5        | 70.5                             | 0.0000000               | 306.6        | 93.3                             | 0.0145373               |
| 404.0        | 70.8                             | 0.0000175               | 304.8        | 93.8                             | 0.0983535               |

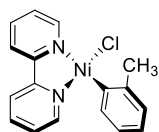

**1C** with Ni–C distance of 1.90 Å (near-equilibrium geometry) – CASSCF/NEVPT2 lowest transition energies with CPCM(THF) (10e,9o Active Space) – 25 triplet roots, 15 singlet roots. Active Space Orbitals (in order for CI vector notation below):  $d(xy)$ ,  $d(x^2-y^2)/C(sp^2)$ ,  $d(yz)$ ,  $d(z^2)$ ,  $d(xz)$ ,  $d(x^2-y^2)/C(sp^2)^*$ ,  $\pi^*(1)$ ,  $\pi^*(2)$ ,  $\pi^*(3)$ .

| State | Root | Multiplicity | $\Delta E/\text{nm}$ | $\Delta E/\text{kcal mol}^{-1}$ | CI vector | Contribution |
|-------|------|--------------|----------------------|---------------------------------|-----------|--------------|
| 0     | 0    | 1            | ---                  | ---                             | 222220000 | 0.4707       |
|       |      |              |                      |                                 | 222210100 | 0.2626       |
| 1     | 0    | 3            | 1175.1               | 24.3                            | 222121000 | 0.7308       |
|       |      |              |                      |                                 | 212122000 | 0.1607       |
| 2     | 1    | 3            | 988.1                | 28.9                            | 222211000 | 0.4189       |
|       |      |              |                      |                                 | 221221000 | 0.3539       |
|       |      |              |                      |                                 | 212212000 | 0.1016       |
| 3     | 2    | 3            | 914.6                | 31.3                            | 221221000 | 0.4120       |
|       |      |              |                      |                                 | 222211000 | 0.3465       |
| 4     | 3    | 3            | 779.6                | 36.7                            | 222120100 | 0.7568       |
| 5     | 1    | 1            | 758.2                | 37.7                            | 222120100 | 0.7661       |
| 6     | 4    | 3            | 711.7                | 40.2                            | 222210100 | 0.7937       |
| 7     | 5    | 3            | 666.8                | 42.9                            | 122221000 | 0.6534       |
|       |      |              |                      |                                 | 221212000 | 0.1308       |
|       |      |              |                      |                                 | 112222000 | 0.1011       |
| 8     | 2    | 1            | 658.1                | 43.4                            | 221220100 | 0.5069       |
|       |      |              |                      |                                 | 222210100 | 0.2440       |
| 9     | 3    | 1            | 646.7                | 44.2                            | 222210100 | 0.2604       |
|       |      |              |                      |                                 | 221220100 | 0.2513       |
|       |      |              |                      |                                 | 222220000 | 0.1508       |
| 10    | 6    | 3            | 612.0                | 46.7                            | 221220100 | 0.7510       |
| 11    | 4    | 1            | 477.8                | 59.8                            | 222121000 | 0.4509       |
|       |      |              |                      |                                 | 222210010 | 0.1810       |
|       |      |              |                      |                                 | 122221000 | 0.1014       |
| 12    | 5    | 1            | 476.9                | 59.9                            | 122220100 | 0.6407       |
|       |      |              |                      |                                 | 221211100 | 0.1072       |
| 13    | 6    | 1            | 472.4                | 60.5                            | 222211000 | 0.5308       |
|       |      |              |                      |                                 | 221221000 | 0.1881       |
| 14    | 7    | 3            | 459.1                | 62.3                            | 122220100 | 0.7385       |
| 15    | 8    | 3            | 457.0                | 62.6                            | 222120010 | 0.6761       |
| 16    | 7    | 1            | 454.9                | 62.9                            | 222120010 | 0.6879       |
| 17    | 8    | 1            | 454.8                | 62.9                            | 221221000 | 0.4761       |
|       |      |              |                      |                                 | 222211000 | 0.2273       |
| 18    | 9    | 1            | 449.0                | 63.7                            | 122221000 | 0.4983       |
|       |      |              |                      |                                 | 222210010 | 0.1679       |
| 19    | 10   | 1            | 442.1                | 64.7                            | 222121000 | 0.2385       |
|       |      |              |                      |                                 | 222210010 | 0.2331       |
|       |      |              |                      |                                 | 122221000 | 0.1009       |
| 20    | 9    | 3            | 435.9                | 65.6                            | 222210010 | 0.7097       |



**1C** with Ni–C distance of 1.90 Å (near-equilibrium geometry) – CASSCF/QD-NEVPT2 lowest transition energies with CPCM(THF) (10e,9o Active Space) – 25 triplet roots, 15 singlet roots. Active Space Orbitals (in order for CI vector notation below): d(xy), d(x<sup>2</sup>-y<sup>2</sup>)/C(sp<sup>2</sup>), d(yz), d(z<sup>2</sup>), d(xz), d(x<sup>2</sup>-y<sup>2</sup>)/C(sp<sup>2</sup>)\*, π\*(1), π\*(2), π\*(3).

| State | Root | Multiplicity | ΔE/nm  | ΔE/kcal mol <sup>-1</sup> | CI vector | Contribution |
|-------|------|--------------|--------|---------------------------|-----------|--------------|
| 0     | 0    | 1            | ---    | ---                       | 222220000 | 0.5732       |
|       |      |              |        |                           | 222210100 | 0.1292       |
|       |      |              |        |                           | 212221000 | 0.1244       |
| 1     | 0    | 3            | 1082.0 | 26.4                      | 222121000 | 0.7259       |
|       |      |              |        |                           | 212122000 | 0.1569       |
| 2     | 1    | 3            | 928.2  | 30.8                      | 222211000 | 0.5359       |
|       |      |              |        |                           | 221221000 | 0.2306       |
|       |      |              |        |                           | 212212000 | 0.1258       |
| 3     | 2    | 3            | 856.4  | 33.4                      | 221221000 | 0.5164       |
|       |      |              |        |                           | 222211000 | 0.2103       |
| 4     | 3    | 3            | 734.5  | 38.9                      | 222120100 | 0.7195       |
| 5     | 1    | 1            | 716.5  | 39.9                      | 222120100 | 0.7674       |
| 6     | 4    | 3            | 674.8  | 42.4                      | 222210100 | 0.7887       |
| 7     | 5    | 3            | 647.1  | 44.2                      | 122221000 | 0.6337       |
| 8     | 2    | 1            | 635.4  | 45.0                      | 222210100 | 0.5553       |
|       |      |              |        |                           | 221220100 | 0.1250       |
| 9     | 3    | 1            | 587.1  | 48.7                      | 221220100 | 0.6367       |
| 10    | 6    | 3            | 584.8  | 48.9                      | 221220100 | 0.7263       |
| 11    | 4    | 1            | 463.5  | 61.7                      | 222121000 | 0.3571       |
|       |      |              |        |                           | 222210010 | 0.2946       |
| 12    | 5    | 1            | 461.1  | 62.0                      | 122220100 | 0.3566       |
|       |      |              |        |                           | 222211000 | 0.3112       |
| 13    | 6    | 1            | 456.2  | 62.7                      | 222211000 | 0.3985       |
|       |      |              |        |                           | 122220100 | 0.3683       |
| 14    | 7    | 3            | 443.8  | 64.4                      | 122220100 | 0.3996       |
|       |      |              |        |                           | 222120010 | 0.2648       |
| 15    | 8    | 3            | 442.0  | 64.7                      | 122220100 | 0.3385       |
|       |      |              |        |                           | 222120010 | 0.3141       |
|       |      |              |        |                           | 222120001 | 0.1013       |
| 16    | 7    | 1            | 441.9  | 64.7                      | 222120010 | 0.4054       |
|       |      |              |        |                           | 222120001 | 0.1446       |
|       |      |              |        |                           | 221221000 | 0.1178       |
| 17    | 8    | 1            | 438.6  | 65.2                      | 221221000 | 0.2227       |
|       |      |              |        |                           | 222120010 | 0.1832       |
| 18    | 9    | 1            | 433.7  | 65.9                      | 122221000 | 0.4209       |
| 19    | 10   | 1            | 426.3  | 67.1                      | 221221000 | 0.2890       |
|       |      |              |        |                           | 122221000 | 0.2371       |
|       |      |              |        |                           | 222121000 | 0.1251       |
| 20    | 9    | 3            | 422.5  | 67.7                      | 222210010 | 0.6393       |
|       |      |              |        |                           | 222210001 | 0.1518       |



**1C** with Ni–C distance of 3.50 Å (dissociation limit) – CASSCF/NEVPT2 lowest transition energies with CPCM(THF) (10e,8o Active Space) – 25 triplet roots, 15 singlet roots. Active Space Orbitals (in order for CI vector notation below): d(xy), d(yz), d(z<sup>2</sup>), d(xz), d(x<sup>2</sup>-y<sup>2</sup>)/C(sp<sup>2</sup>), d(x<sup>2</sup>-y<sup>2</sup>)/C(sp<sup>2</sup>)\*, π\*(1), π\*(2).

| State | Root | Multiplicity | ΔE/nm   | ΔE/kcal mol <sup>-1</sup> | CI vector | Contribution |
|-------|------|--------------|---------|---------------------------|-----------|--------------|
| 0     | 0    | 1            | ---     | ---                       | 22211110  | 0.7852       |
| 1     | 0    | 3            | 48887.7 | 0.6                       | 22211110  | 0.8198       |
| 2     | 1    | 3            | 8698.6  | 3.3                       | 22121110  | 0.9208       |
| 3     | 1    | 1            | 6772.2  | 4.2                       | 22121110  | 0.9177       |
| 4     | 2    | 3            | 6026.1  | 4.7                       | 22121110  | 0.9573       |
| 5     | 3    | 3            | 4848.7  | 5.9                       | 22211110  | 0.8454       |
| 6     | 4    | 3            | 3525.2  | 8.1                       | 21221110  | 0.8699       |
| 7     | 2    | 1            | 3360.4  | 8.5                       | 21221110  | 0.8405       |
| 8     | 5    | 3            | 3171.6  | 9.0                       | 21221110  | 0.8774       |
| 9     | 3    | 1            | 1399.9  | 20.4                      | 21212110  | 0.4651       |
|       |      |              |         |                           | 12221110  | 0.4538       |
| 10    | 6    | 3            | 1381.1  | 20.7                      | 21212110  | 0.4696       |
|       |      |              |         |                           | 12221110  | 0.4676       |
| 11    | 7    | 3            | 1266.6  | 22.6                      | 12221110  | 0.4917       |
|       |      |              |         |                           | 21212110  | 0.4393       |
| 12    | 4    | 1            | 1160.7  | 24.6                      | 22220110  | 0.8263       |
| 13    | 8    | 3            | 1152.9  | 24.8                      | 22220110  | 0.7554       |
| 14    | 5    | 1            | 1124.4  | 25.4                      | 22211101  | 0.7898       |
| 15    | 9    | 3            | 1105.4  | 25.9                      | 22211101  | 0.7537       |
| 16    | 10   | 3            | 1095.1  | 26.1                      | 22121101  | 0.9140       |
| 17    | 6    | 1            | 1094.1  | 26.1                      | 22121101  | 0.8993       |
| 18    | 11   | 3            | 1069.5  | 26.7                      | 22121101  | 0.9397       |
| 19    | 12   | 3            | 1010.2  | 28.3                      | 22211101  | 0.8445       |
| 20    | 7    | 1            | 992.9   | 28.8                      | 12212110  | 0.7939       |
|       |      |              |         |                           | 21122110  | 0.1241       |

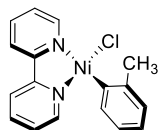

**1C** with Ni–C distance of 3.50 Å (dissociation limit) – CASSCF/QD-NEVPT2 lowest transition energies with CPCM(THF) (10e,8o Active Space) – 25 triplet roots, 15 singlet roots. Active Space Orbitals (in order for CI vector notation below):  $d(xy)$ ,  $d(yz)$ ,  $d(z^2)$ ,  $d(xz)$ ,  $d(x^2-y^2)/C(sp^2)$ ,  $d(x^2-y^2)/C(sp^2)^*$ ,  $\pi^*(1)$ ,  $\pi^*(2)$ .

| State | Root | Multiplicity | $\Delta E/\text{nm}$ | $\Delta E/\text{kcal mol}^{-1}$ | CI vector | Contribution |
|-------|------|--------------|----------------------|---------------------------------|-----------|--------------|
| 0     | 0    | 1            | ---                  | ---                             | 22211110  | 0.7633       |
| 1     | 0    | 3            | 45269.4              | 0.6                             | 22211110  | 0.8022       |
| 2     | 1    | 3            | 8066.5               | 3.5                             | 22121110  | 0.9182       |
| 3     | 1    | 1            | 6401.2               | 4.5                             | 22121110  | 0.9148       |
| 4     | 2    | 3            | 5726.4               | 5.0                             | 22121110  | 0.9548       |
| 5     | 3    | 3            | 4639.5               | 6.2                             | 22211110  | 0.8428       |
| 6     | 4    | 3            | 3423.1               | 8.4                             | 21221110  | 0.8678       |
| 7     | 2    | 1            | 3274.7               | 8.7                             | 21221110  | 0.8317       |
| 8     | 5    | 3            | 3092.4               | 9.2                             | 21221110  | 0.8711       |
| 9     | 3    | 1            | 1382.5               | 20.7                            | 21212110  | 0.4679       |
|       |      |              |                      |                                 | 12221110  | 0.4544       |
| 10    | 6    | 3            | 1363.1               | 21.0                            | 21212110  | 0.4750       |
|       |      |              |                      |                                 | 12221110  | 0.4695       |
| 11    | 7    | 3            | 1255.1               | 22.8                            | 12221110  | 0.4870       |
|       |      |              |                      |                                 | 21212110  | 0.4431       |
| 12    | 8    | 3            | 1153.5               | 24.8                            | 22220110  | 0.8088       |
| 13    | 4    | 1            | 1148.6               | 24.9                            | 22220110  | 0.8171       |
| 14    | 5    | 1            | 1111.2               | 25.7                            | 22211101  | 0.7195       |
| 15    | 9    | 3            | 1085.5               | 26.3                            | 22211101  | 0.5496       |
|       |      |              |                      |                                 | 22121101  | 0.2802       |
| 16    | 10   | 3            | 1078.3               | 26.5                            | 22121101  | 0.7152       |
|       |      |              |                      |                                 | 22211101  | 0.1758       |
| 17    | 6    | 1            | 1073.4               | 26.6                            | 22121101  | 0.8547       |
| 18    | 11   | 3            | 1048.5               | 27.3                            | 22121101  | 0.8725       |
| 19    | 12   | 3            | 997.6                | 28.7                            | 22211101  | 0.8414       |
| 20    | 7    | 1            | 990.7                | 28.9                            | 12212110  | 0.7368       |

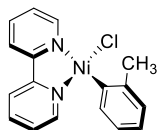

**1C** with Ni–C distance of 1.90 Å (near-equilibrium geometry) – CASSCF/NEVPT2 composition of the singlet ground state with CPCM(THF) (10e,9o Active Space) – 25 triplet roots, 15 singlet roots. Active Space Orbitals (in order for CI vector notation below):  $d(xy)$ ,  $d(x^2-y^2)/C(sp^2)$ ,  $d(yz)$ ,  $d(z^2)$ ,  $d(xz)$ ,  $d(x^2-y^2)/C(sp^2)^*$ ,  $\pi^*(1)$ ,  $\pi^*(2)$ ,  $\pi^*(3)$ .

| CI vector                      | Transition                                                                       | Contribution |
|--------------------------------|----------------------------------------------------------------------------------|--------------|
| 222220000                      | Closed-shell singlet (CSS) $d^8$                                                 | 0.4707       |
| 222210100                      | $d(xz) \rightarrow \pi^*(1)$                                                     | 0.2626       |
| 212221000                      | $d(x^2-y^2)/C(sp^2) \rightarrow d(x^2-y^2)/C(sp^2)^*$                            | 0.0947       |
| 202212100                      | $2x[d(x^2-y^2)/C(sp^2)] + d(xz) \rightarrow 2x[d(x^2-y^2)/C(sp^2)^*] + \pi^*(1)$ | 0.0339       |
| 221220100                      | $d(yz) \rightarrow \pi^*(1)$                                                     | 0.0287       |
| 222210010                      | $d(xz) \rightarrow \pi^*(2)$                                                     | 0.0155       |
| 212211100                      | $d(x^2-y^2)/C(sp^2) + d(xz) \rightarrow d(x^2-y^2)/C(sp^2)^* + \pi^*(1)$         | 0.0127       |
| 221220001                      | $d(yz) \rightarrow \pi^*(3)$                                                     | 0.0117       |
| <b>Sum of CSS</b>              |                                                                                  | <b>47 %</b>  |
| <b>Sum of all MLCT</b>         |                                                                                  | <b>32 %</b>  |
| <b>Sum of all d-d</b>          |                                                                                  | <b>9 %</b>   |
| <b>Sum of mixed MLCT + d-d</b> |                                                                                  | <b>5 %</b>   |

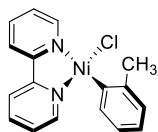

**1C** with Ni–C distance of 1.90 Å (near-equilibrium geometry) – CASSCF/QD-NEVPT2 composition of the singlet ground state with CPCM(THF) (10e,9o Active Space) – 25 triplet roots, 15 singlet roots. Active Space Orbitals (in order for CI vector notation below):  $d(xy)$ ,  $d(x^2-y^2)/C(sp^2)$ ,  $d(yz)$ ,  $d(z^2)$ ,  $d(xz)$ ,  $d(x^2-y^2)/C(sp^2)^*$ ,  $\pi^*(1)$ ,  $\pi^*(2)$ ,  $\pi^*(3)$ .

| CI vector                      | Transition                                                                       | Contribution |
|--------------------------------|----------------------------------------------------------------------------------|--------------|
| 222220000                      | Closed-shell singlet (CSS) $d^8$                                                 | 0.5732       |
| 222210100                      | $d(xz) \rightarrow \pi^*(1)$                                                     | 0.1292       |
| 212221000                      | $d(x^2-y^2)/C(sp^2) \rightarrow d(x^2-y^2)/C(sp^2)^*$                            | 0.1244       |
| 221220001                      | $d(yz) \rightarrow \pi^*(3)$                                                     | 0.0277       |
| 222210010                      | $d(xz) \rightarrow \pi^*(2)$                                                     | 0.0246       |
| 222121000                      | $d(z^2) \rightarrow d(x^2-y^2)/C(sp^2)^*$                                        | 0.0176       |
| 202212100                      | $2x[d(x^2-y^2)/C(sp^2)] + d(xz) \rightarrow 2x[d(x^2-y^2)/C(sp^2)^*] + \pi^*(1)$ | 0.0175       |
| 221220100                      | $d(yz) \rightarrow \pi^*(1)$                                                     | 0.0173       |
| 222022000                      | $2x[d(z^2)] \rightarrow 2x[d(x^2-y^2)/C(sp^2)^*]$                                | 0.0102       |
| <b>Sum of CSS</b>              |                                                                                  | <b>57 %</b>  |
| <b>Sum of all MLCT</b>         |                                                                                  | <b>20 %</b>  |
| <b>Sum of all d-d</b>          |                                                                                  | <b>15 %</b>  |
| <b>Sum of mixed MLCT + d-d</b> |                                                                                  | <b>2 %</b>   |

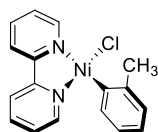

**1C** with Ni–C distance of 3.50 Å (dissociation limit) – CASSCF/NEVPT2 composition of the singlet ground state with CPCM(THF) (10e,8o Active Space) – 25 triplet roots, 15 singlet roots. Active Space Orbitals (in order for CI vector notation below): d(xy), d(yz), d(z<sup>2</sup>), d(xz), d(x<sup>2</sup>-y<sup>2</sup>)/C(sp<sup>2</sup>), d(x<sup>2</sup>-y<sup>2</sup>)/C(sp<sup>2</sup>)\*, π\*(1), π\*(2).

| CI vector                      | Transition                                                                                                                               | Contribution |
|--------------------------------|------------------------------------------------------------------------------------------------------------------------------------------|--------------|
| 22211110                       | d(xz) + d(x <sup>2</sup> -y <sup>2</sup> )/C(sp <sup>2</sup> ) → d(x <sup>2</sup> -y <sup>2</sup> )/C(sp <sup>2</sup> )* + π*(1)         | 0.7851       |
| 22112110                       | d(z <sup>2</sup> ) + d(xz) → d(x <sup>2</sup> -y <sup>2</sup> )/C(sp <sup>2</sup> )* + π*(1)                                             | 0.0581       |
| 22221100                       | d(x <sup>2</sup> -y <sup>2</sup> )/C(sp <sup>2</sup> ) → d(x <sup>2</sup> -y <sup>2</sup> )/C(sp <sup>2</sup> )*                         | 0.0415       |
| 11222110                       | d(xy) + d(yz) → d(x <sup>2</sup> -y <sup>2</sup> )/C(sp <sup>2</sup> )* + π*(1)                                                          | 0.0333       |
| 22212010                       | d(xz) → π*(1)                                                                                                                            | 0.0269       |
| 21221110                       | d(yz) + d(x <sup>2</sup> -y <sup>2</sup> )/C(sp <sup>2</sup> ) → d(x <sup>2</sup> -y <sup>2</sup> )/C(sp <sup>2</sup> )* + π*(1)         | 0.0179       |
| 22210210                       | 2x[d(x <sup>2</sup> -y <sup>2</sup> )/C(sp <sup>2</sup> )] + d(xz) → 2x[d(x <sup>2</sup> -y <sup>2</sup> )/C(sp <sup>2</sup> )*] + π*(1) | 0.0122       |
| <b>Sum of CSS</b>              |                                                                                                                                          | <b>0 %</b>   |
| <b>Sum of all MLCT</b>         |                                                                                                                                          | <b>3 %</b>   |
| <b>Sum of all d-d</b>          |                                                                                                                                          | <b>4 %</b>   |
| <b>Sum of mixed MLCT + d-d</b> |                                                                                                                                          | <b>91 %</b>  |

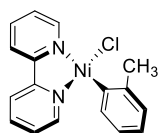

**1C** with Ni–C distance of 3.50 Å (dissociation limit) – CASSCF/QD-NEVPT2 composition of the singlet ground state with CPCM(THF) (10e,8o Active Space) – 25 triplet roots, 15 singlet roots. Active Space Orbitals (in order for CI vector notation below): d(xy), d(yz), d(z<sup>2</sup>), d(xz), d(x<sup>2</sup>-y<sup>2</sup>)/C(sp<sup>2</sup>), d(x<sup>2</sup>-y<sup>2</sup>)/C(sp<sup>2</sup>)\*, π\*(1), π\*(2).

| CI vector                      | Transition                                                                                                                               | Contribution |
|--------------------------------|------------------------------------------------------------------------------------------------------------------------------------------|--------------|
| 22211110                       | d(xz) + d(x <sup>2</sup> -y <sup>2</sup> )/C(sp <sup>2</sup> ) → d(x <sup>2</sup> -y <sup>2</sup> )/C(sp <sup>2</sup> )* + π*(1)         | 0.7633       |
| 22112110                       | d(z <sup>2</sup> ) + d(xz) → d(x <sup>2</sup> -y <sup>2</sup> )/C(sp <sup>2</sup> )* + π*(1)                                             | 0.0575       |
| 22221100                       | d(x <sup>2</sup> -y <sup>2</sup> )/C(sp <sup>2</sup> ) → d(x <sup>2</sup> -y <sup>2</sup> )/C(sp <sup>2</sup> )*                         | 0.0480       |
| 11222110                       | d(xy) + d(yz) → d(x <sup>2</sup> -y <sup>2</sup> )/C(sp <sup>2</sup> )* + π*(1)                                                          | 0.0289       |
| 22212010                       | d(xz) → π*(1)                                                                                                                            | 0.0280       |
| 21221110                       | d(yz) + d(x <sup>2</sup> -y <sup>2</sup> )/C(sp <sup>2</sup> ) → d(x <sup>2</sup> -y <sup>2</sup> )/C(sp <sup>2</sup> )* + π*(1)         | 0.0213       |
| 22211101                       | d(xz) + d(x <sup>2</sup> -y <sup>2</sup> )/C(sp <sup>2</sup> ) → d(x <sup>2</sup> -y <sup>2</sup> )/C(sp <sup>2</sup> )* + π*(2)         | 0.0130       |
| 22210210                       | 2x[d(x <sup>2</sup> -y <sup>2</sup> )/C(sp <sup>2</sup> )] + d(xz) → 2x[d(x <sup>2</sup> -y <sup>2</sup> )/C(sp <sup>2</sup> )*] + π*(1) | 0.0127       |
| <b>Sum of CSS</b>              |                                                                                                                                          | <b>0 %</b>   |
| <b>Sum of all MLCT</b>         |                                                                                                                                          | <b>3 %</b>   |
| <b>Sum of all d-d</b>          |                                                                                                                                          | <b>5 %</b>   |
| <b>Sum of mixed MLCT + d-d</b> |                                                                                                                                          | <b>90 %</b>  |





**1C** – CASSCF/NEVPT2 spin-orbit corrected absorption transitions for the CPCM(THF) phase spectrum (10e,9o Active Space) – 25 triplet roots, 15 singlet roots.

| <i>E</i> /nm | <i>E</i> /kcal mol <sup>-1</sup> | <i>f</i> <sub>osc</sub> | <i>E</i> /nm | <i>E</i> /kcal mol <sup>-1</sup> | <i>f</i> <sub>osc</sub> |
|--------------|----------------------------------|-------------------------|--------------|----------------------------------|-------------------------|
| 791.4        | 36.1                             | 0.0001409               | 404.3        | 70.7                             | 0.0000005               |
| 791.1        | 36.1                             | 0.0000004               | 403.4        | 70.9                             | 0.0001640               |
| 783.3        | 36.5                             | 0.0057985               | 387.3        | 73.8                             | 0.0009911               |
| 773.3        | 37.0                             | 0.0003790               | 387.0        | 73.9                             | 0.0000002               |
| 708.5        | 40.4                             | 0.0034868               | 387.0        | 73.9                             | 0.0000092               |
| 705.2        | 40.5                             | 0.0000033               | 383.9        | 74.5                             | 0.0052554               |
| 703.1        | 40.7                             | 0.0000900               | 375.5        | 76.1                             | 0.1628376               |
| 677.2        | 42.2                             | 0.1027156               | 362.1        | 79.0                             | 0.0135836               |
| 662.1        | 43.2                             | 0.0000043               | 361.5        | 79.1                             | 0.0000095               |
| 661.6        | 43.2                             | 0.0000035               | 361.4        | 79.1                             | 0.0000138               |
| 644.7        | 44.3                             | 0.0082840               | 341.9        | 83.6                             | 0.2021970               |
| 630.6        | 45.3                             | 0.2062495               | 336.4        | 85.0                             | 0.0001002               |
| 604.4        | 47.3                             | 0.0200463               | 335.2        | 85.3                             | 0.0000001               |
| 604.2        | 47.3                             | 0.0006789               | 333.1        | 85.8                             | 0.0000003               |
| 603.8        | 47.4                             | 0.0000432               | 323.8        | 88.3                             | 0.0000021               |
| 478.2        | 59.8                             | 0.0391197               | 323.7        | 88.3                             | 0.0004103               |
| 474.7        | 60.2                             | 0.0002525               | 322.9        | 88.5                             | 0.0005196               |
| 470.7        | 60.7                             | 0.0001032               | 322.8        | 88.6                             | 0.0000108               |
| 461.3        | 62.0                             | 0.0000073               | 322.5        | 88.7                             | 0.0000513               |
| 461.3        | 62.0                             | 0.0000029               | 320.5        | 89.2                             | 0.0000040               |
| 460.4        | 62.1                             | 0.0064283               | 319.0        | 89.6                             | 0.0000005               |
| 459.3        | 62.2                             | 0.0024988               | 317.2        | 90.1                             | 0.0000012               |
| 457.3        | 62.5                             | 0.0001958               | 314.6        | 90.9                             | 0.0001067               |
| 457.1        | 62.6                             | 0.0000102               | 404.3        | 70.7                             | 0.0000005               |
| 457.0        | 62.6                             | 0.0007540               | 403.4        | 70.9                             | 0.0001640               |
| 452.9        | 63.1                             | 0.0016343               | 387.3        | 73.8                             | 0.0009911               |
| 445.8        | 64.1                             | 0.0050637               | 387.0        | 73.9                             | 0.0000002               |
| 439.0        | 65.1                             | 0.0574476               | 387.0        | 73.9                             | 0.0000092               |
| 431.8        | 66.2                             | 0.0000124               | 383.9        | 74.5                             | 0.0052554               |
| 431.7        | 66.2                             | 0.0000498               | 375.5        | 76.1                             | 0.1628376               |
| 431.3        | 66.3                             | 0.0005702               | 362.1        | 79.0                             | 0.0135836               |
| 405.4        | 70.5                             | 0.0200094               | 361.5        | 79.1                             | 0.0000095               |
| 404.5        | 70.7                             | 0.0020872               | 361.4        | 79.1                             | 0.0000138               |



**1C** – CASSCF/QD-NEVPT2 spin-orbit corrected absorption transitions for the CPCM(THF) phase spectrum (10e,9o Active Space) – 25 triplet roots, 15 singlet roots.

| <i>E</i> /nm | <i>E</i> /kcal mol <sup>-1</sup> | <i>f</i> <sub>osc</sub> | <i>E</i> /nm | <i>E</i> /kcal mol <sup>-1</sup> | <i>f</i> <sub>osc</sub> |
|--------------|----------------------------------|-------------------------|--------------|----------------------------------|-------------------------|
| 744.4        | 38.4                             | 0.0000042               | 418.8        | 68.3                             | 0.0006234               |
| 743.6        | 38.4                             | 0.0030625               | 418.6        | 68.3                             | 0.0013536               |
| 739.7        | 38.7                             | 0.0005384               | 417.9        | 68.4                             | 0.0008402               |
| 729.9        | 39.2                             | 0.0004037               | 391.8        | 73.0                             | 0.0000033               |
| 670.2        | 42.7                             | 0.0004854               | 391.7        | 73.0                             | 0.0020846               |
| 668.8        | 42.8                             | 0.0222618               | 391.2        | 73.1                             | 0.0078593               |
| 668.2        | 42.8                             | 0.0013591               | 390.6        | 73.2                             | 0.0042777               |
| 648.4        | 44.1                             | 0.0041488               | 377.9        | 75.7                             | 0.0000206               |
| 641.6        | 44.6                             | 0.0000051               | 377.4        | 75.8                             | 0.0000392               |
| 640.5        | 44.6                             | 0.0000443               | 377.4        | 75.8                             | 0.0003230               |
| 625.3        | 45.7                             | 0.0257412               | 373.6        | 76.5                             | 0.0001854               |
| 581.1        | 49.2                             | 0.2935383               | 366.1        | 78.1                             | 0.0214988               |
| 577.8        | 49.5                             | 0.0000432               | 365.9        | 78.1                             | 0.0001393               |
| 577.5        | 49.5                             | 0.0000524               | 365.8        | 78.2                             | 0.0005547               |
| 576.8        | 49.6                             | 0.0291096               | 361.1        | 79.2                             | 0.1592524               |
| 465.1        | 61.5                             | 0.0002482               | 338.7        | 84.4                             | 0.0075171               |
| 459.2        | 62.3                             | 0.0005166               | 338.5        | 84.5                             | 0.0000290               |
| 454.5        | 62.9                             | 0.0372295               | 338.5        | 84.5                             | 0.0001680               |
| 446.9        | 64.0                             | 0.0000942               | 330.6        | 86.5                             | 0.2166402               |
| 446.9        | 64.0                             | 0.0000686               | 328.0        | 87.2                             | 0.0012190               |
| 446.2        | 64.1                             | 0.0113825               | 327.3        | 87.3                             | 0.0000947               |
| 443.6        | 64.5                             | 0.0008598               | 324.2        | 88.2                             | 0.0001391               |
| 441.3        | 64.8                             | 0.0012906               | 317.7        | 90.0                             | 0.0001597               |
| 440.9        | 64.9                             | 0.0003869               | 315.9        | 90.5                             | 0.0001654               |
| 440.7        | 64.9                             | 0.0004738               | 312.0        | 91.7                             | 0.0000574               |
| 436.0        | 65.6                             | 0.0038788               | 310.7        | 92.0                             | 0.0000537               |
| 431.2        | 66.3                             | 0.0165864               | 308.6        | 92.7                             | 0.0002910               |
| 424.8        | 67.3                             | 0.0435680               | 306.4        | 93.3                             | 0.0000902               |



1C – TD-DFT (B3LYP) absorption transitions (singlets only) for the CPCM(THF) phase spectrum.

| <i>E</i> /nm | <i>E</i> /kcal mol <sup>-1</sup> | <i>f</i> <sub>osc</sub> | <i>E</i> /nm | <i>E</i> /kcal mol <sup>-1</sup> | <i>f</i> <sub>osc</sub> |
|--------------|----------------------------------|-------------------------|--------------|----------------------------------|-------------------------|
| 762.2        | 37.5                             | 0.0000000               | 381.5        | 74.9                             | 0.0000022               |
| 636.8        | 44.9                             | 0.0000000               | 376.4        | 76.0                             | 0.0000000               |
| 608.6        | 47.0                             | 0.0008883               | 375.6        | 76.1                             | 0.0080765               |
| 592.8        | 48.2                             | 0.0000000               | 368.0        | 77.7                             | 0.0014573               |
| 585.7        | 48.8                             | 0.0000000               | 353.1        | 81.0                             | 0.0000000               |
| 533.8        | 53.6                             | 0.0000000               | 353.1        | 81.0                             | 0.0000000               |
| 525.6        | 54.4                             | 0.0016800               | 348.1        | 82.1                             | 0.0199718               |
| 511.3        | 55.9                             | 0.0084429               | 347.9        | 82.2                             | 0.0000629               |
| 489.4        | 58.4                             | 0.0000000               | 344.0        | 83.1                             | 0.0000000               |
| 488.1        | 58.6                             | 0.0005297               | 341.3        | 83.8                             | 0.0119202               |
| 485.1        | 58.9                             | 0.0000179               | 340.6        | 83.9                             | 0.0240326               |
| 482.2        | 59.3                             | 0.0000000               | 340.0        | 84.1                             | 0.0002971               |
| 470.5        | 60.8                             | 0.0153194               | 339.1        | 84.3                             | 0.0000000               |
| 465.0        | 61.5                             | 0.0000000               | 332.7        | 85.9                             | 0.0000000               |
| 455.9        | 62.7                             | 0.0007479               | 325.5        | 87.8                             | 0.0000000               |
| 453.6        | 63.0                             | 0.0001736               | 315.1        | 90.7                             | 0.0000000               |
| 452.2        | 63.2                             | 0.0003639               | 312.7        | 91.4                             | 0.0061925               |
| 446.1        | 64.1                             | 0.0571231               | 312.4        | 91.5                             | 0.0000000               |
| 419.4        | 68.2                             | 0.0000000               | 312.4        | 91.5                             | 0.0253885               |
| 417.0        | 68.6                             | 0.0002398               | 310.1        | 92.2                             | 0.0000000               |
| 395.5        | 72.3                             | 0.0000000               | 310.0        | 92.2                             | 0.0000000               |
| 394.9        | 72.4                             | 0.0004577               | 308.4        | 92.7                             | 0.0001654               |
| 389.6        | 73.4                             | 0.0000000               | 308.3        | 92.7                             | 0.0000000               |
| 386.2        | 74.0                             | 0.0000000               | 305.9        | 93.5                             | 0.0000000               |
| 383.3        | 74.6                             | 0.0000000               | 301.1        | 94.9                             | 0.0037814               |



1C – TD-DFT (B3LYP) absorption transitions (singlets only) for the CPCM(Toluene) phase spectrum.

| <i>E</i> /nm | <i>E</i> /kcal mol <sup>-1</sup> | <i>f</i> <sub>osc</sub> | <i>E</i> /nm | <i>E</i> /kcal mol <sup>-1</sup> | <i>f</i> <sub>osc</sub> |
|--------------|----------------------------------|-------------------------|--------------|----------------------------------|-------------------------|
| 742.3        | 38.5                             | 0.0000000               | 391.6        | 73.0                             | 0.0000000               |
| 738.2        | 38.7                             | 0.0000000               | 390.8        | 73.2                             | 0.0000000               |
| 710.1        | 40.3                             | 0.0006408               | 389.9        | 73.3                             | 0.0000000               |
| 685.4        | 41.7                             | 0.0000000               | 389.5        | 73.4                             | 0.0000618               |
| 591.7        | 48.3                             | 0.0000000               | 384.8        | 74.3                             | 0.0000000               |
| 583.6        | 49.0                             | 0.0000000               | 384.1        | 74.4                             | 0.0000000               |
| 576.5        | 49.6                             | 0.0004532               | 379.1        | 75.4                             | 0.0140823               |
| 558.8        | 51.2                             | 0.0174286               | 377.7        | 75.7                             | 0.0007511               |
| 557.6        | 51.3                             | 0.0000000               | 376.7        | 75.9                             | 0.0023473               |
| 555.2        | 51.5                             | 0.0000000               | 372.9        | 76.7                             | 0.0071587               |
| 527.1        | 54.2                             | 0.0000000               | 372.9        | 76.7                             | 0.0270966               |
| 508.6        | 56.2                             | 0.0003646               | 372.7        | 76.7                             | 0.0000000               |
| 505.7        | 56.5                             | 0.0004749               | 368.0        | 77.7                             | 0.0000000               |
| 488.0        | 58.6                             | 0.0514571               | 354.5        | 80.7                             | 0.0000000               |
| 475.5        | 60.1                             | 0.0058113               | 351.9        | 81.3                             | 0.0000000               |
| 473.9        | 60.3                             | 0.0037102               | 350.8        | 81.5                             | 0.0007714               |
| 465.5        | 61.4                             | 0.0000000               | 335.4        | 85.3                             | 0.0000000               |
| 464.0        | 61.6                             | 0.0002080               | 334.0        | 85.6                             | 0.0000000               |
| 454.2        | 63.0                             | 0.0006348               | 326.9        | 87.5                             | 0.0000000               |
| 453.3        | 63.1                             | 0.0037225               | 324.9        | 88.0                             | 0.0175192               |
| 445.0        | 64.2                             | 0.0003318               | 324.5        | 88.1                             | 0.0669589               |
| 420.9        | 67.9                             | 0.0000000               | 314.8        | 90.8                             | 0.0000000               |
| 419.2        | 68.2                             | 0.0095985               | 314.7        | 90.8                             | 0.0000000               |
| 416.9        | 68.6                             | 0.0000061               | 309.1        | 92.5                             | 0.0000000               |
| 415.8        | 68.8                             | 0.0000000               | 307.6        | 93.0                             | 0.0034418               |
| 399.8        | 71.5                             | 0.0000000               | 303.8        | 94.1                             | 0.0001911               |
| 398.7        | 71.7                             | 0.0031784               | 301.2        | 94.9                             | 0.0016825               |

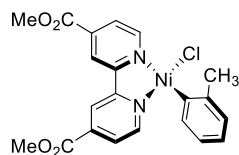

**1D** with Ni–C distance of 1.90 Å (near-equilibrium geometry) – CASSCF/NEVPT2 lowest transition energies with CPCM(THF) (10e,9o Active Space) – 25 triplet roots, 15 singlet roots. Active Space Orbitals (in order for CI vector notation below): d(yz), d(xy), d(xz), d(z<sup>2</sup>), d(x<sup>2</sup>-y<sup>2</sup>)/C(sp<sup>2</sup>), d(x<sup>2</sup>-y<sup>2</sup>)/C(sp<sup>2</sup>)\*, π\*(1), π\*(2), π\*(3).

| State | Root | Multiplicity | ΔE/nm   | ΔE/kcal mol <sup>-1</sup> | CI vector | Contribution |
|-------|------|--------------|---------|---------------------------|-----------|--------------|
| 0     | 0    | 1            | ---     | ---                       | 221220100 | 0.5068       |
|       |      |              |         |                           | 222220000 | 0.1320       |
| 1     | 0    | 3            | 17896.1 | 1.6                       | 221221000 | 0.3990       |
|       |      |              |         |                           | 122221000 | 0.2368       |
| 2     | 1    | 3            | 2176.3  | 13.1                      | 222120100 | 0.3912       |
|       |      |              |         |                           | 222210100 | 0.3333       |
| 3     | 1    | 1            | 2046.4  | 14.0                      | 222120100 | 0.3938       |
|       |      |              |         |                           | 222210100 | 0.3329       |
| 4     | 2    | 3            | 1702.6  | 16.8                      | 221220100 | 0.6996       |
|       |      |              |         |                           | 5         | 3            |
| 6     | 2    | 1            | 1226.6  | 23.3                      | 122211100 |              |
|       |      |              |         |                           | 222121000 | 0.1419       |
| 7     | 4    | 3            | 1140.2  | 25.1                      | 212221000 | 0.1156       |
|       |      |              |         |                           | 112221100 | 0.1152       |
| 8     | 3    | 1            | 988.6   | 28.9                      | 122220100 | 0.6133       |
|       |      |              |         |                           | 221220100 | 0.1311       |
| 9     | 5    | 3            | 978.7   | 29.2                      | 122220100 | 0.7452       |
|       |      |              |         |                           | 221220010 | 0.5631       |
| 10    | 4    | 1            | 811.4   | 35.2                      | 121221100 | 0.2572       |
|       |      |              |         |                           | 122221000 | 0.2237       |
| 11    | 6    | 3            | 770.2   | 37.1                      | 221221000 | 0.1715       |
|       |      |              |         |                           | 212221100 | 0.1162       |
| 12    | 7    | 3            | 741.1   | 38.6                      | 222120010 | 0.4427       |
|       |      |              |         |                           | 222210010 | 0.2742       |
| 13    | 5    | 1            | 740.9   | 38.6                      | 222120010 | 0.3884       |
|       |      |              |         |                           | 222210010 | 0.3333       |
| 14    | 6    | 1            | 708.8   | 40.3                      | 212220100 | 0.6576       |
|       |      |              |         |                           | 221220100 | 0.6467       |
| 15    | 8    | 3            | 705.3   | 40.5                      | 221220001 | 0.3179       |
|       |      |              |         |                           | 122220001 | 0.1334       |
| 16    | 9    | 3            | 704.0   | 40.6                      | 122220010 | 0.1330       |
|       |      |              |         |                           | 222120001 | 0.3824       |
| 17    | 7    | 1            | 702.3   | 40.7                      | 222210001 | 0.3249       |
|       |      |              |         |                           | 221220010 | 0.7028       |
| 18    | 8    | 1            | 688.4   | 41.5                      | 221220001 | 0.3895       |
|       |      |              |         |                           | 222210001 | 0.3317       |
| 19    | 9    | 1            | 663.4   | 43.1                      | 122220010 | 0.5864       |
|       |      |              |         |                           | 221220001 | 0.3637       |
| 20    | 10   | 3            | 588.4   | 48.6                      | 122220001 | 0.2663       |
|       |      |              |         |                           | 222220010 | 0.7359       |

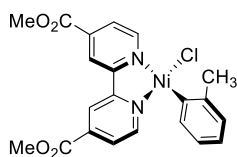

**1D** with Ni–C distance of 1.90 Å (near-equilibrium geometry) – CASSCF/QD-NEVPT2 lowest transition energies with CPCM(THF) (10e,9o Active Space) – 25 triplet roots, 15 singlet roots. Active Space Orbitals (in order for CI vector notation below):  $d(yz)$ ,  $d(xy)$ ,  $d(xz)$ ,  $d(z^2)$ ,  $d(x^2-y^2)/C(sp^2)$ ,  $d(x^2-y^2)/C(sp^2)^*$ ,  $\pi^*(1)$ ,  $\pi^*(2)$ ,  $\pi^*(3)$ .

| State | Root | Multiplicity | $\Delta E/\text{nm}$ | $\Delta E/\text{kcal mol}^{-1}$ | CI vector | Contribution |
|-------|------|--------------|----------------------|---------------------------------|-----------|--------------|
| 0     | 0    | 1            | ---                  | ---                             | 222220000 | 0.2955       |
|       |      |              |                      |                                 | 221220100 | 0.1953       |
|       |      |              |                      |                                 | 122220001 | 0.1251       |
| 1     | 0    | 3            | 4017.8               | 7.1                             | 221221000 | 0.5949       |
|       |      |              |                      |                                 | 221122000 | 0.1039       |
| 2     | 1    | 3            | 2689.2               | 10.6                            | 222121000 | 0.4092       |
|       |      |              |                      |                                 | 222211000 | 0.2813       |
|       |      |              |                      |                                 | 222112000 | 0.1660       |
| 3     | 2    | 3            | 1777.3               | 16.1                            | 122221000 | 0.6021       |
|       |      |              |                      |                                 | 122212000 | 0.1878       |
| 4     | 3    | 3            | 1290.6               | 22.2                            | 222120100 | 0.3610       |
|       |      |              |                      |                                 | 222210100 | 0.3538       |
| 5     | 1    | 1            | 1244.7               | 23.0                            | 222120100 | 0.3623       |
|       |      |              |                      |                                 | 222210100 | 0.3553       |
| 6     | 4    | 3            | 1102.7               | 25.9                            | 221220100 | 0.6901       |
| 7     | 2    | 1            | 941.7                | 30.4                            | 221220100 | 0.4474       |
|       |      |              |                      |                                 | 122220100 | 0.1736       |
| 8     | 5    | 3            | 839.6                | 34.1                            | 122220100 | 0.7260       |
| 9     | 3    | 1            | 709.8                | 40.3                            | 122220100 | 0.4316       |
|       |      |              |                      |                                 | 221220010 | 0.1771       |
| 10    | 4    | 1            | 620.5                | 46.1                            | 222120010 | 0.3665       |
|       |      |              |                      |                                 | 222210010 | 0.3173       |
| 11    | 6    | 3            | 613.9                | 46.6                            | 222120010 | 0.3628       |
|       |      |              |                      |                                 | 222210010 | 0.3124       |
| 12    | 5    | 1            | 596.0                | 48.0                            | 212220100 | 0.6456       |
| 13    | 7    | 3            | 594.3                | 48.1                            | 212220100 | 0.6600       |
| 14    | 8    | 3            | 572.1                | 50.0                            | 221220010 | 0.6512       |
| 15    | 9    | 3            | 566.1                | 50.5                            | 222120001 | 0.3619       |
|       |      |              |                      |                                 | 222210001 | 0.3090       |
| 16    | 6    | 1            | 563.8                | 50.7                            | 222120001 | 0.3616       |
|       |      |              |                      |                                 | 222210001 | 0.3139       |
| 17    | 7    | 1            | 558.1                | 51.2                            | 221220010 | 0.4121       |
|       |      |              |                      |                                 | 122220001 | 0.1354       |
| 18    | 8    | 1            | 534.5                | 53.5                            | 221220001 | 0.5998       |
| 19    | 10   | 3            | 534.1                | 53.5                            | 221220001 | 0.5744       |
| 20    | 11   | 3            | 514.0                | 55.6                            | 212221000 | 0.2049       |
|       |      |              |                      |                                 | 211221100 | 0.1931       |
|       |      |              |                      |                                 | 112221100 | 0.1883       |

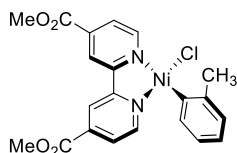

**1D** with Ni–C distance of 3.50 Å (dissociation limit) – CASSCF/NEVPT2 lowest transition energies with CPCM(THF) (10e,9o Active Space) – 25 triplet roots, 15 singlet roots. Active Space Orbitals (in order for CI vector notation below):  $d(xy)$ ,  $d(yz)$ ,  $d(xz)$ ,  $d(z^2)$ ,  $d(x^2-y^2)/C(sp^2)$ ,  $d(x^2-y^2)/C(sp^2)^*$ ,  $\pi^*(1)$ ,  $\pi^*(2)$ ,  $\pi^*(3)$ .

| State | Root | Multiplicity | $\Delta E/\text{nm}$ | $\Delta E/\text{kcal mol}^{-1}$ | CI vector | Contribution |
|-------|------|--------------|----------------------|---------------------------------|-----------|--------------|
| 0     | 0    | 1            | ---                  | ---                             | 221211100 | 0.7473       |
| 1     | 0    | 3            | 44065.1              | 0.6                             | 221211100 | 0.8013       |
| 2     | 1    | 3            | 8672.1               | 3.3                             | 222111100 | 0.9271       |
| 3     | 1    | 1            | 6470.2               | 4.4                             | 222111100 | 0.9211       |
| 4     | 2    | 3            | 5742.1               | 5.0                             | 222111100 | 0.9905       |
| 5     | 3    | 3            | 4367.2               | 6.5                             | 221211100 | 0.7253       |
|       |      |              |                      |                                 | 212211100 | 0.1102       |
| 6     | 4    | 3            | 3329.7               | 8.6                             | 212211100 | 0.7282       |
|       |      |              |                      |                                 | 221211100 | 0.1229       |
| 7     | 2    | 1            | 3182.9               | 9.0                             | 212211100 | 0.7860       |
| 8     | 5    | 3            | 3007.5               | 9.5                             | 212211100 | 0.8422       |
| 9     | 3    | 1            | 1366.2               | 20.9                            | 211221100 | 0.4715       |
|       |      |              |                      |                                 | 122211100 | 0.4399       |
| 10    | 6    | 3            | 1346.9               | 21.2                            | 211221100 | 0.4771       |
|       |      |              |                      |                                 | 122211100 | 0.4645       |
| 11    | 7    | 3            | 1236.5               | 23.1                            | 122211100 | 0.4819       |
|       |      |              |                      |                                 | 211221100 | 0.4407       |
| 12    | 8    | 3            | 1114.7               | 25.6                            | 222201100 | 0.7572       |
| 13    | 4    | 1            | 1109.5               | 25.8                            | 222201100 | 0.6855       |
|       |      |              |                      |                                 | 222111010 | 0.1505       |
| 14    | 5    | 1            | 1096.6               | 26.1                            | 212211010 | 0.6073       |
|       |      |              |                      |                                 | 221211010 | 0.1368       |
| 15    | 9    | 3            | 1074.3               | 26.6                            | 222111010 | 0.8720       |
| 16    | 10   | 3            | 1071.0               | 26.7                            | 212211010 | 0.6467       |
|       |      |              |                      |                                 | 221211010 | 0.1513       |
| 17    | 6    | 1            | 1063.6               | 26.9                            | 222111010 | 0.7696       |
|       |      |              |                      |                                 | 222201100 | 0.1336       |
| 18    | 11   | 3            | 1036.5               | 27.6                            | 222111010 | 0.9712       |
| 19    | 7    | 1            | 1002.7               | 28.5                            | 121221100 | 0.7046       |
| 20    | 12   | 3            | 1001.3               | 28.6                            | 121221100 | 0.7056       |
|       |      |              |                      |                                 | 221121100 | 0.1021       |

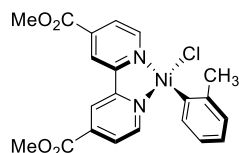

**1D** with Ni–C distance of 3.50 Å (dissociation limit) – CASSCF/QD-NEVPT2 lowest transition energies with CPCM(THF) (10e,9o Active Space) – 25 triplet roots, 15 singlet roots. Active Space Orbitals (in order for CI vector notation below): d(xy), d(yz), d(xz), d(z<sup>2</sup>), d(x<sup>2</sup>-y<sup>2</sup>)/C(sp<sup>2</sup>), d(x<sup>2</sup>-y<sup>2</sup>)/C(sp<sup>2</sup>)\*, π\*(1), π\*(2), π\*(3).

| State | Root | Multiplicity | ΔE/nm   | ΔE/kcal mol <sup>-1</sup> | CI vector | Contribution |
|-------|------|--------------|---------|---------------------------|-----------|--------------|
| 0     | 0    | 1            | ---     | ---                       | 221211100 | 0.6937       |
| 1     | 0    | 3            | 38910.5 | 0.7                       | 221211100 | 0.7534       |
| 2     | 1    | 3            | 6456.6  | 4.4                       | 222111100 | 0.9139       |
| 3     | 1    | 1            | 5127.9  | 5.6                       | 222111100 | 0.9111       |
| 4     | 2    | 3            | 4661.4  | 6.1                       | 222111100 | 0.9806       |
| 5     | 3    | 3            | 3702.3  | 7.7                       | 221211100 | 0.6894       |
|       |      |              |         |                           | 212211100 | 0.1349       |
| 6     | 4    | 3            | 2891.9  | 9.9                       | 212211100 | 0.7008       |
|       |      |              |         |                           | 221211100 | 0.1425       |
| 7     | 2    | 1            | 2856.9  | 10.0                      | 212211100 | 0.7946       |
| 8     | 5    | 3            | 2683.3  | 10.7                      | 212211100 | 0.8568       |
| 9     | 3    | 1            | 1280.1  | 22.3                      | 211221100 | 0.4779       |
|       |      |              |         |                           | 122211100 | 0.4376       |
| 10    | 6    | 3            | 1262.3  | 22.6                      | 211221100 | 0.4843       |
|       |      |              |         |                           | 122211100 | 0.4643       |
| 11    | 7    | 3            | 1166.1  | 24.5                      | 122211100 | 0.4791       |
|       |      |              |         |                           | 211221100 | 0.4457       |
| 12    | 4    | 1            | 1081.5  | 26.4                      | 222201100 | 0.7942       |
| 13    | 8    | 3            | 1076.7  | 26.6                      | 222201100 | 0.7558       |
| 14    | 5    | 1            | 1030.6  | 27.7                      | 212211010 | 0.4540       |
|       |      |              |         |                           | 221211010 | 0.1270       |
| 15    | 9    | 3            | 1007.2  | 28.4                      | 222111010 | 0.8019       |
| 16    | 10   | 3            | 1004.0  | 28.5                      | 212211010 | 0.4972       |
|       |      |              |         |                           | 221211010 | 0.1139       |
| 17    | 6    | 1            | 984.8   | 29.0                      | 222111010 | 0.8237       |
| 18    | 11   | 3            | 982.1   | 29.1                      | 222111010 | 0.9196       |
| 19    | 7    | 1            | 977.9   | 29.2                      | 121221100 | 0.5530       |
| 20    | 12   | 3            | 971.7   | 29.4                      | 121221100 | 0.6088       |
|       |      |              |         |                           | 221211010 | 0.1069       |



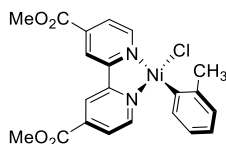

**1D** with Ni–C distance of 1.90 Å (near-equilibrium geometry) – CASSCF/NEVPT2 composition of the singlet ground state with CPCM(THF) (10e,9o Active Space) – 25 triplet roots, 15 singlet roots. Active Space Orbitals (in order for CI vector notation below):  $d(yz)$ ,  $d(xy)$ ,  $d(xz)$ ,  $d(z^2)$ ,  $d(x^2-y^2)/C(sp^2)$ ,  $d(x^2-y^2)/C(sp^2)^*$ ,  $\pi^*(1)$ ,  $\pi^*(2)$ ,  $\pi^*(3)$ .

| CI vector                      | Transition                                                                            | Contribution |
|--------------------------------|---------------------------------------------------------------------------------------|--------------|
| 221220100                      | $d(xz) \rightarrow \pi^*(1)$                                                          | 0.5068       |
| 222220000                      | Closed-shell singlet (CSS) $d^8$                                                      | 0.1320       |
| 122220100                      | $d(yz) \rightarrow \pi^*(1)$                                                          | 0.0906       |
| 222120100                      | $d(z^2) \rightarrow \pi^*(1)$                                                         | 0.0571       |
| 221112100                      | $d(x^2-y^2)/C(sp^2) + d(xz) + d(z^2) \rightarrow 2x[d(x^2-y^2)/C(sp^2)^*] + \pi^*(1)$ | 0.0333       |
| 221202100                      | $2x[d(x^2-y^2)/C(sp^2)] + d(xz) \rightarrow 2x[d(x^2-y^2)/C(sp^2)^*] + \pi^*(1)$      | 0.0295       |
| 221121100                      | $d(xz) + d(z^2) \rightarrow d(x^2-y^2)/C(sp^2)^* + \pi^*(1)$                          | 0.0250       |
| 221211100                      | $d(x^2-y^2)/C(sp^2) + d(xz) \rightarrow d(x^2-y^2)/C(sp^2)^* + \pi^*(1)$              | 0.0141       |
| 222211000                      | $d(x^2-y^2)/C(sp^2) \rightarrow d(x^2-y^2)/C(sp^2)^*$                                 | 0.0131       |
| 221022100                      | $d(xz) + 2x[d(z^2)] \rightarrow 2x[d(x^2-y^2)/C(sp^2)^*] + \pi^*(1)$                  | 0.0124       |
| <b>Sum of CSS</b>              |                                                                                       | <b>51 %</b>  |
| <b>Sum of all MLCT</b>         |                                                                                       | <b>65 %</b>  |
| <b>Sum of all d-d</b>          |                                                                                       | <b>1 %</b>   |
| <b>Sum of mixed MLCT + d-d</b> |                                                                                       | <b>11 %</b>  |

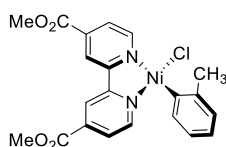

**1D** with Ni–C distance of 1.90 Å (near-equilibrium geometry) – CASSCF/QD-NEVPT2 composition of the singlet ground state with CPCM(THF) (10e,9o Active Space) – 25 triplet roots, 15 singlet roots. Active Space Orbitals (in order for CI vector notation below):  $d(yz)$ ,  $d(xy)$ ,  $d(xz)$ ,  $d(z^2)$ ,  $d(x^2-y^2)/C(sp^2)$ ,  $d(x^2-y^2)/C(sp^2)^*$ ,  $\pi^*(1)$ ,  $\pi^*(2)$ ,  $\pi^*(3)$ .

| CI vector                      | Transition                                                                            | Contribution |
|--------------------------------|---------------------------------------------------------------------------------------|--------------|
| 222220000                      | Closed-shell singlet (CSS) $d^8$                                                      | 0.2955       |
| 221220100                      | $d(xz) \rightarrow \pi^*(1)$                                                          | 0.1953       |
| 122220001                      | $d(yz) \rightarrow \pi^*(3)$                                                          | 0.1251       |
| 122220100                      | $d(yz) \rightarrow \pi^*(1)$                                                          | 0.0941       |
| 222211000                      | $d(x^2-y^2)/C(sp^2) \rightarrow d(x^2-y^2)/C(sp^2)^*$                                 | 0.0595       |
| 221220010                      | $d(xz) \rightarrow \pi^*(2)$                                                          | 0.0297       |
| 222121000                      | $d(z^2) \rightarrow d(x^2-y^2)/C(sp^2)^*$                                             | 0.0225       |
| 222120100                      | $d(z^2) \rightarrow \pi^*(1)$                                                         | 0.0224       |
| 122202001                      | $2x[d(x^2-y^2)/C(sp^2)] + d(yz) \rightarrow 2x[d(x^2-y^2)/C(sp^2)^*] + \pi^*(3)$      | 0.0139       |
| 221112100                      | $d(x^2-y^2)/C(sp^2) + d(xz) + d(z^2) \rightarrow 2x[d(x^2-y^2)/C(sp^2)^*] + \pi^*(1)$ | 0.0137       |
| 221202100                      | $2x[d(x^2-y^2)/C(sp^2)] + d(xz) \rightarrow 2x[d(x^2-y^2)/C(sp^2)^*] + \pi^*(1)$      | 0.0122       |
| 122211001                      | $d(yz) + d(x^2-y^2)/C(sp^2) \rightarrow d(x^2-y^2)/C(sp^2)^* + \pi^*(3)$              | 0.0100       |
| <b>Sum of CSS</b>              |                                                                                       | <b>30 %</b>  |
| <b>Sum of all MLCT</b>         |                                                                                       | <b>47 %</b>  |
| <b>Sum of all d-d</b>          |                                                                                       | <b>8 %</b>   |
| <b>Sum of mixed MLCT + d-d</b> |                                                                                       | <b>5 %</b>   |

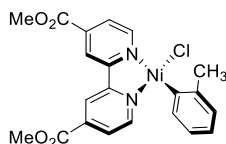

**1D** with Ni–C distance of 3.50 Å (dissociation limit) – CASSCF/NEVPT2 composition of the singlet ground state with CPCM(THF) (10e,9o Active Space) – 25 triplet roots, 15 singlet roots. Active Space Orbitals (in order for CI vector notation below):  $d(xy)$ ,  $d(yz)$ ,  $d(xz)$ ,  $d(z^2)$ ,  $d(x^2-y^2)/C(sp^2)$ ,  $d(x^2-y^2)/C(sp^2)^*$ ,  $\pi^*(1)$ ,  $\pi^*(2)$ ,  $\pi^*(3)$ .

| CI vector                      | Transition                                                                       | Contribution |
|--------------------------------|----------------------------------------------------------------------------------|--------------|
| 221211100                      | $d(xz) + d(x^2-y^2)/C(sp^2) \rightarrow d(x^2-y^2)/C(sp^2)^* + \pi^*(1)$         | 0.7473       |
| 222211000                      | $d(x^2-y^2)/C(sp^2) \rightarrow d(x^2-y^2)/C(sp^2)^*$                            | 0.0447       |
| 212121100                      | $d(yz) + d(z^2) \rightarrow d(x^2-y^2)/C(sp^2)^* + \pi^*(1)$                     | 0.0422       |
| 221220100                      | $d(xz) \rightarrow \pi^*(1)$                                                     | 0.0404       |
| 212211100                      | $d(yz) + d(x^2-y^2)/C(sp^2) \rightarrow d(x^2-y^2)/C(sp^2)^* + \pi^*(1)$         | 0.0353       |
| 112221100                      | $d(xy) + d(yz) \rightarrow d(x^2-y^2)/C(sp^2)^* + \pi^*(1)$                      | 0.0289       |
| 221202100                      | $2x[d(x^2-y^2)/C(sp^2)] + d(xz) \rightarrow 2x[d(x^2-y^2)/C(sp^2)^*] + \pi^*(1)$ | 0.0222       |
| 221121100                      | $d(xz) + d(z^2) \rightarrow d(x^2-y^2)/C(sp^2)^* + \pi^*(1)$                     | 0.0163       |
| <b>Sum of CSS</b>              |                                                                                  | <b>0 %</b>   |
| <b>Sum of all MLCT</b>         |                                                                                  | <b>4 %</b>   |
| <b>Sum of all d-d</b>          |                                                                                  | <b>4 %</b>   |
| <b>Sum of mixed MLCT + d-d</b> |                                                                                  | <b>89 %</b>  |

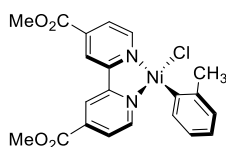

**1D** with Ni–C distance of 3.50 Å (dissociation limit) – CASSCF/QD-NEVPT2 composition of the singlet ground state with CPCM(THF) (10e,9o Active Space) – 25 triplet roots, 15 singlet roots. Active Space Orbitals (in order for CI vector notation below):  $d(xy)$ ,  $d(yz)$ ,  $d(xz)$ ,  $d(z^2)$ ,  $d(x^2-y^2)/C(sp^2)$ ,  $d(x^2-y^2)/C(sp^2)^*$ ,  $\pi^*(1)$ ,  $\pi^*(2)$ ,  $\pi^*(3)$ .

| CI vector                      | Transition                                                                       | Contribution |
|--------------------------------|----------------------------------------------------------------------------------|--------------|
| 221211100                      | $d(xz) + d(x^2-y^2)/C(sp^2) \rightarrow d(x^2-y^2)/C(sp^2)^* + \pi^*(1)$         | 0.6937       |
| 222211000                      | $d(x^2-y^2)/C(sp^2) \rightarrow d(x^2-y^2)/C(sp^2)^*$                            | 0.0621       |
| 221220100                      | $d(xz) \rightarrow \pi^*(1)$                                                     | 0.0400       |
| 212121100                      | $d(yz) + d(z^2) \rightarrow d(x^2-y^2)/C(sp^2)^* + \pi^*(1)$                     | 0.0383       |
| 212211010                      | $d(yz) + d(x^2-y^2)/C(sp^2) \rightarrow d(x^2-y^2)/C(sp^2)^* + \pi^*(2)$         | 0.0314       |
| 221211001                      | $d(xz) + d(x^2-y^2)/C(sp^2) \rightarrow d(x^2-y^2)/C(sp^2)^* + \pi^*(3)$         | 0.0266       |
| 112221100                      | $d(xy) + d(yz) \rightarrow d(x^2-y^2)/C(sp^2)^* + \pi^*(1)$                      | 0.0229       |
| 221202100                      | $2x[d(x^2-y^2)/C(sp^2)] + d(xz) \rightarrow 2x[d(x^2-y^2)/C(sp^2)^*] + \pi^*(1)$ | 0.0218       |
| 212211100                      | $d(yz) + d(x^2-y^2)/C(sp^2) \rightarrow d(x^2-y^2)/C(sp^2)^* + \pi^*(1)$         | 0.0154       |
| 212211001                      | $d(yz) + d(x^2-y^2)/C(sp^2) \rightarrow d(x^2-y^2)/C(sp^2)^* + \pi^*(3)$         | 0.0136       |
| 221121100                      | $d(xz) + d(z^2) \rightarrow d(x^2-y^2)/C(sp^2)^* + \pi^*(1)$                     | 0.0103       |
| <b>Sum of CSS</b>              |                                                                                  | <b>0 %</b>   |
| <b>Sum of all MLCT</b>         |                                                                                  | <b>4 %</b>   |
| <b>Sum of all d-d</b>          |                                                                                  | <b>6 %</b>   |
| <b>Sum of mixed MLCT + d-d</b> |                                                                                  | <b>87 %</b>  |



**1D** – CASSCF/NEVPT2 spin-orbit corrected absorption transitions for the CPCM(THF) phase spectrum (10e,9o Active Space) – 25 triplet roots, 15 singlet roots.

| <i>E</i> /nm | <i>E</i> /kcal mol <sup>-1</sup> | <i>f</i> <sub>osc</sub> | <i>E</i> /nm | <i>E</i> /kcal mol <sup>-1</sup> | <i>f</i> <sub>osc</sub> |
|--------------|----------------------------------|-------------------------|--------------|----------------------------------|-------------------------|
| 779.3        | 36.7                             | 0.0034686               | 444.6        | 64.3                             | 0.0000021               |
| 776.8        | 36.8                             | 0.0000009               | 429.4        | 66.6                             | 0.0003160               |
| 762.0        | 37.5                             | 0.0026391               | 429.0        | 66.6                             | 0.0000025               |
| 733.1        | 39.0                             | 0.0002951               | 428.9        | 66.7                             | 0.0005347               |
| 732.8        | 39.0                             | 0.0001765               | 426.3        | 67.1                             | 0.0002466               |
| 732.7        | 39.0                             | 0.0000699               | 425.9        | 67.1                             | 0.0006335               |
| 732.6        | 39.0                             | 0.0000716               | 423.5        | 67.5                             | 0.0001846               |
| 724.1        | 39.5                             | 0.0078199               | 422.0        | 67.7                             | 0.0005327               |
| 709.7        | 40.3                             | 0.0209191               | 421.5        | 67.8                             | 0.0000816               |
| 707.9        | 40.4                             | 0.0346133               | 418.0        | 68.4                             | 0.0012669               |
| 703.7        | 40.6                             | 0.0000962               | 412.8        | 69.3                             | 0.0000186               |
| 700.9        | 40.8                             | 0.0000301               | 410.4        | 69.7                             | 0.0006448               |
| 694.4        | 41.2                             | 0.0014733               | 408.6        | 70.0                             | 0.0000156               |
| 691.7        | 41.3                             | 0.0000215               | 399.4        | 71.6                             | 0.0000207               |
| 680.3        | 42.0                             | 0.0216781               | 398.0        | 71.8                             | 0.0003211               |
| 661.2        | 43.2                             | 0.0817267               | 396.4        | 72.1                             | 0.0000096               |
| 649.6        | 44.0                             | 0.0801269               | 380.9        | 75.1                             | 0.0006906               |
| 580.5        | 49.3                             | 0.0007728               | 380.7        | 75.1                             | 0.0003543               |
| 579.9        | 49.3                             | 0.0002952               | 380.2        | 75.2                             | 0.0012778               |
| 579.5        | 49.3                             | 0.0000062               | 370.4        | 77.2                             | 0.0002712               |
| 551.9        | 51.8                             | 0.0000122               | 368.4        | 77.6                             | 0.0006926               |
| 551.9        | 51.8                             | 0.0000543               | 357.3        | 80.0                             | 0.0000411               |
| 541.5        | 52.8                             | 0.0006074               | 356.7        | 80.1                             | 0.0000425               |
| 534.1        | 53.5                             | 0.0005288               | 356.4        | 80.2                             | 0.0000445               |
| 531.6        | 53.8                             | 0.0000467               | 324.7        | 88.1                             | 0.0000296               |
| 531.5        | 53.8                             | 0.0000135               | 324.4        | 88.1                             | 0.0000002               |
| 518.8        | 55.1                             | 0.0003635               | 322.7        | 88.6                             | 0.0000162               |
| 516.3        | 55.4                             | 0.0000097               | 316.5        | 90.3                             | 0.0000036               |
| 516.0        | 55.4                             | 0.0000720               | 309.0        | 92.5                             | 0.0001581               |
| 457.8        | 62.5                             | 0.0000029               | 308.1        | 92.8                             | 0.0000007               |
| 457.2        | 62.5                             | 0.0002359               | 307.5        | 93.0                             | 0.0000018               |
| 455.7        | 62.7                             | 0.0002385               | 305.5        | 93.6                             | 0.0008940               |



**1D** – CASSCF/QD-NEVPT2 spin-orbit corrected absorption transitions for the CPCM(THF) phase spectrum (10e,9o Active Space) – 25 triplet roots, 15 singlet roots.

| <i>E</i> /nm | <i>E</i> /kcal mol <sup>-1</sup> | <i>f</i> <sub>osc</sub> | <i>E</i> /nm | <i>E</i> /kcal mol <sup>-1</sup> | <i>f</i> <sub>osc</sub> |
|--------------|----------------------------------|-------------------------|--------------|----------------------------------|-------------------------|
| 706.5        | 40.5                             | 0.0000567               | 485.2        | 58.9                             | 0.0015741               |
| 625.8        | 45.7                             | 0.0165492               | 457.2        | 62.5                             | 0.0006183               |
| 620.2        | 46.1                             | 0.0010650               | 457.1        | 62.5                             | 0.0000589               |
| 619.9        | 46.1                             | 0.0000398               | 457.1        | 62.6                             | 0.0041246               |
| 615.0        | 46.5                             | 0.0002970               | 397.4        | 71.9                             | 0.0007074               |
| 593.3        | 48.2                             | 0.1226378               | 394.0        | 72.6                             | 0.0008267               |
| 590.5        | 48.4                             | 0.0000965               | 393.9        | 72.6                             | 0.0000051               |
| 590.4        | 48.4                             | 0.0000090               | 393.9        | 72.6                             | 0.0000063               |
| 590.2        | 48.4                             | 0.0000096               | 348.9        | 82.0                             | 0.0000589               |
| 572.9        | 49.9                             | 0.0017640               | 348.6        | 82.0                             | 0.0000295               |
| 571.6        | 50.0                             | 0.0000158               | 346.2        | 82.6                             | 0.0000130               |
| 571.5        | 50.0                             | 0.0003246               | 340.4        | 84.0                             | 0.0000142               |
| 569.8        | 50.2                             | 0.0992976               | 337.6        | 84.7                             | 0.0000091               |
| 566.7        | 50.5                             | 0.0107312               | 337.4        | 84.7                             | 0.0000217               |
| 565.6        | 50.5                             | 0.0070692               | 334.0        | 85.6                             | 0.0012096               |
| 565.4        | 50.6                             | 0.0010411               | 333.8        | 85.6                             | 0.0002021               |
| 551.5        | 51.8                             | 0.0048365               | 333.4        | 85.8                             | 0.0002679               |
| 527.7        | 54.2                             | 0.0110551               | 332.1        | 86.1                             | 0.0000177               |
| 527.6        | 54.2                             | 0.0023156               | 331.1        | 86.4                             | 0.0000434               |
| 527.2        | 54.2                             | 0.0201183               | 325.0        | 88.0                             | 0.0000149               |
| 525.1        | 54.5                             | 0.0043555               | 324.2        | 88.2                             | 0.0000494               |
| 511.4        | 55.9                             | 0.0000723               | 323.9        | 88.3                             | 0.0000260               |
| 510.7        | 56.0                             | 0.0004219               | 314.9        | 90.8                             | 0.0011092               |
| 509.8        | 56.1                             | 0.0034986               | 313.4        | 91.2                             | 0.0000026               |
| 491.2        | 58.2                             | 0.2083714               | 311.8        | 91.7                             | 0.0000378               |
| 485.3        | 58.9                             | 0.0015191               | 304.4        | 93.9                             | 0.0002759               |
| 485.2        | 58.9                             | 0.0020957               | 303.6        | 94.2                             | 0.0000455               |

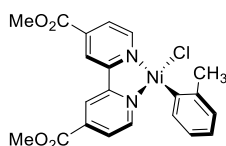

**1D** – TD-DFT (B3LYP) absorption transitions (singlets only) for the CPCM(THF) phase spectrum.

| <i>E</i> /nm | <i>E</i> /kcal mol <sup>-1</sup> | <i>f</i> <sub>osc</sub> | <i>E</i> /nm | <i>E</i> /kcal mol <sup>-1</sup> | <i>f</i> <sub>osc</sub> |
|--------------|----------------------------------|-------------------------|--------------|----------------------------------|-------------------------|
| 799.6        | 35.8                             | 0.0000000               | 420.2        | 68.0                             | 0.0000000               |
| 762.6        | 37.5                             | 0.0005842               | 414.8        | 68.9                             | 0.0039215               |
| 735.6        | 38.9                             | 0.0000000               | 413.9        | 69.1                             | 0.0000000               |
| 729.4        | 39.2                             | 0.0000000               | 412.0        | 69.4                             | 0.0000801               |
| 667.1        | 42.9                             | 0.0000000               | 404.3        | 70.7                             | 0.0000000               |
| 656.3        | 43.6                             | 0.0012606               | 402.6        | 71.0                             | 0.0000000               |
| 596.3        | 47.9                             | 0.0231600               | 394.8        | 72.4                             | 0.0000304               |
| 583.3        | 49.0                             | 0.0000000               | 391.9        | 72.9                             | 0.0891486               |
| 578.5        | 49.4                             | 0.0000000               | 391.1        | 73.1                             | 0.0098014               |
| 557.6        | 51.3                             | 0.0000000               | 388.0        | 73.7                             | 0.0000000               |
| 554.7        | 51.5                             | 0.0000000               | 385.8        | 74.1                             | 0.0000000               |
| 549.1        | 52.1                             | 0.0016902               | 375.5        | 76.1                             | 0.0004797               |
| 519.7        | 55.0                             | 0.0000000               | 361.7        | 79.1                             | 0.0000000               |
| 503.1        | 56.8                             | 0.0000000               | 352.6        | 81.1                             | 0.0000000               |
| 502.2        | 56.9                             | 0.0006492               | 348.3        | 82.1                             | 0.0286645               |
| 493.4        | 57.9                             | 0.0000384               | 348.0        | 82.2                             | 0.0000000               |
| 485.6        | 58.9                             | 0.0005823               | 337.0        | 84.8                             | 0.0000000               |
| 474.5        | 60.3                             | 0.0462504               | 334.7        | 85.4                             | 0.0000000               |
| 473.8        | 60.3                             | 0.0001103               | 330.4        | 86.5                             | 0.0000000               |
| 472.7        | 60.5                             | 0.0024552               | 329.4        | 86.8                             | 0.0000000               |
| 454.9        | 62.9                             | 0.0274735               | 328.5        | 87.0                             | 0.0193181               |
| 454.0        | 63.0                             | 0.0000000               | 326.4        | 87.6                             | 0.0000000               |
| 453.5        | 63.0                             | 0.0000295               | 324.3        | 88.2                             | 0.0000000               |
| 448.8        | 63.7                             | 0.0000000               | 318.4        | 89.8                             | 0.0000000               |
| 448.2        | 63.8                             | 0.0002354               | 311.1        | 91.9                             | 0.3176534               |
| 448.0        | 63.8                             | 0.0005233               | 311.0        | 91.9                             | 0.0000000               |
| 446.7        | 64.0                             | 0.0658083               | 310.0        | 92.2                             | 0.0000000               |
| 440.6        | 64.9                             | 0.0000844               | 306.1        | 93.4                             | 0.0000397               |
| 433.0        | 66.0                             | 0.0000000               | 303.4        | 94.2                             | 0.0066809               |
| 425.5        | 67.2                             | 0.0000000               |              |                                  |                         |

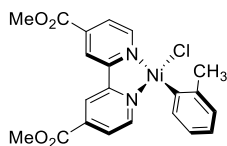

**1D** – TD-DFT (B3LYP) absorption transitions (singlets only) for the CPCM(Toluene) phase spectrum.

| <i>E</i> /nm | <i>E</i> /kcal mol <sup>-1</sup> | <i>f</i> <sub>osc</sub> | <i>E</i> /nm | <i>E</i> /kcal mol <sup>-1</sup> | <i>f</i> <sub>osc</sub> |
|--------------|----------------------------------|-------------------------|--------------|----------------------------------|-------------------------|
| 791.2        | 36.1                             | 0.0000000               | 432.6        | 66.1                             | 0.0000635               |
| 770.3        | 37.1                             | 0.0042634               | 427.5        | 66.9                             | 0.0001879               |
| 767.8        | 37.2                             | 0.0000000               | 426.6        | 67.0                             | 0.0000000               |
| 736.1        | 38.8                             | 0.0000000               | 426.6        | 67.0                             | 0.0000000               |
| 701.5        | 40.8                             | 0.0000000               | 423.9        | 67.5                             | 0.0000726               |
| 676.4        | 42.3                             | 0.0220306               | 420.1        | 68.1                             | 0.0820356               |
| 665.6        | 43.0                             | 0.0000000               | 411.2        | 69.5                             | 0.0000000               |
| 640.5        | 44.6                             | 0.0000000               | 392.7        | 72.8                             | 0.0000000               |
| 627.2        | 45.6                             | 0.0000213               | 390.5        | 73.2                             | 0.0259368               |
| 617.0        | 46.3                             | 0.0047542               | 384.2        | 74.4                             | 0.0129249               |
| 581.3        | 49.2                             | 0.0000000               | 383.2        | 74.6                             | 0.0000000               |
| 578.5        | 49.4                             | 0.0000000               | 381.5        | 74.9                             | 0.0000000               |
| 575.0        | 49.7                             | 0.0000000               | 380.8        | 75.1                             | 0.0000000               |
| 572.9        | 49.9                             | 0.0001907               | 339.0        | 84.3                             | 0.0000000               |
| 547.2        | 52.3                             | 0.0000338               | 336.6        | 85.0                             | 0.0000000               |
| 542.0        | 52.7                             | 0.0000000               | 332.1        | 86.1                             | 0.0035968               |
| 541.4        | 52.8                             | 0.0536190               | 330.7        | 86.4                             | 0.0000532               |
| 511.8        | 55.9                             | 0.0001293               | 324.6        | 88.1                             | 0.0000000               |
| 507.5        | 56.3                             | 0.0000000               | 324.1        | 88.2                             | 0.0000000               |
| 500.6        | 57.1                             | 0.0000000               | 323.7        | 88.3                             | 0.0000000               |
| 499.6        | 57.2                             | 0.0000000               | 319.5        | 89.5                             | 0.0000000               |
| 498.4        | 57.4                             | 0.0000244               | 319.1        | 89.6                             | 0.0001933               |
| 487.2        | 58.7                             | 0.0732367               | 315.9        | 90.5                             | 0.0000544               |
| 480.6        | 59.5                             | 0.0034132               | 314.9        | 90.8                             | 0.0001303               |
| 472.3        | 60.5                             | 0.0042310               | 311.7        | 91.7                             | 0.0005891               |
| 471.9        | 60.6                             | 0.0029585               | 311.7        | 91.7                             | 0.0000000               |
| 471.2        | 60.7                             | 0.0000000               | 311.3        | 91.8                             | 0.3140109               |
| 466.1        | 61.3                             | 0.0000153               | 310.8        | 92.0                             | 0.0115011               |
| 464.8        | 61.5                             | 0.0095820               | 309.4        | 92.4                             | 0.0000000               |
| 460.9        | 62.0                             | 0.0000000               | 308.1        | 92.8                             | 0.0000000               |
| 447.5        | 63.9                             | 0.0008162               | 306.3        | 93.4                             | 0.0020859               |
| 447.1        | 63.9                             | 0.0054379               | 304.7        | 93.8                             | 0.0000000               |
| 435.3        | 65.7                             | 0.0000000               |              |                                  |                         |

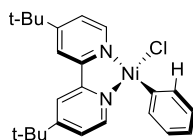

**2B** with Ni–C distance of 1.90 Å (near-equilibrium geometry) – CASSCF/NEVPT2 lowest transition energies with CPCM(THF) (10e,9o Active Space) – 25 triplet roots, 15 singlet roots. Active Space Orbitals (in order for CI vector notation below):  $d(x^2-y^2)/C(sp^2)$ ,  $d(xy)$ ,  $d(yz)$ ,  $d(z^2)$ ,  $d(xz)$ ,  $d(x^2-y^2)/C(sp^2)^*$ ,  $\pi^*(1)$ ,  $\pi^*(2)$ ,  $\pi^*(3)$ .

| State | Root | Multiplicity | $\Delta E/\text{nm}$ | $\Delta E/\text{kcal mol}^{-1}$ | CI vector | Contribution |
|-------|------|--------------|----------------------|---------------------------------|-----------|--------------|
| 0     | 0    | 1            | ---                  | ---                             | 222220000 | 0.5456       |
|       |      |              |                      |                                 | 222210100 | 0.1816       |
|       |      |              |                      |                                 | 122221000 | 0.1180       |
| 1     | 0    | 3            | 1038.1               | 27.5                            | 222121000 | 0.7778       |
|       |      |              |                      |                                 | 122122000 | 0.1624       |
| 2     | 1    | 3            | 901.0                | 31.7                            | 222211000 | 0.5782       |
|       |      |              |                      |                                 | 221221000 | 0.2126       |
|       |      |              |                      |                                 | 122212000 | 0.1228       |
| 3     | 2    | 3            | 829.3                | 34.5                            | 221221000 | 0.5557       |
|       |      |              |                      |                                 | 222211000 | 0.2208       |
| 4     | 3    | 3            | 703.0                | 40.7                            | 222120100 | 0.8153       |
| 5     | 1    | 1            | 686.6                | 41.6                            | 222120100 | 0.8134       |
| 6     | 4    | 3            | 652.2                | 43.8                            | 222210100 | 0.7582       |
| 7     | 5    | 3            | 628.7                | 45.5                            | 212221000 | 0.6416       |
|       |      |              |                      |                                 | 221212000 | 0.1353       |
| 8     | 2    | 1            | 613.0                | 46.6                            | 222210100 | 0.4067       |
|       |      |              |                      |                                 | 221220100 | 0.3413       |
| 9     | 6    | 3            | 560.3                | 51.0                            | 221220100 | 0.7955       |
| 10    | 3    | 1            | 550.8                | 51.9                            | 221220100 | 0.4150       |
|       |      |              |                      |                                 | 222210100 | 0.2080       |
| 11    | 4    | 1            | 460.3                | 62.1                            | 212220100 | 0.5162       |
|       |      |              |                      |                                 | 221221000 | 0.1613       |
|       |      |              |                      |                                 | 221211100 | 0.1035       |
| 12    | 5    | 1            | 458.4                | 62.4                            | 222121000 | 0.3888       |
|       |      |              |                      |                                 | 222120010 | 0.2962       |
| 13    | 6    | 1            | 451.8                | 63.3                            | 222120010 | 0.5104       |
|       |      |              |                      |                                 | 222121000 | 0.2251       |
| 14    | 7    | 1            | 450.3                | 63.5                            | 222211000 | 0.6982       |
| 15    | 8    | 1            | 442.4                | 64.6                            | 212221000 | 0.6543       |
| 16    | 7    | 3            | 431.6                | 66.2                            | 212220100 | 0.7396       |
| 17    | 8    | 3            | 425.9                | 67.1                            | 222210010 | 0.8183       |
| 18    | 9    | 1            | 420.6                | 68.0                            | 221221000 | 0.5735       |
|       |      |              |                      |                                 | 212220100 | 0.2093       |
| 19    | 9    | 3            | 413.6                | 69.1                            | 222120010 | 0.6587       |
|       |      |              |                      |                                 | 211222000 | 0.1430       |
| 20    | 10   | 1            | 410.3                | 69.7                            | 222210010 | 0.6243       |



**2B** with Ni–C distance of 1.90 Å (near-equilibrium geometry) – CASSCF/QD-NEVPT2 lowest transition energies with CPCM(THF) (10e,9o Active Space) – 25 triplet roots, 15 singlet roots. Active Space Orbitals (in order for CI vector notation below):  $d(x^2-y^2)/C(sp^2)$ ,  $d(xy)$ ,  $d(yz)$ ,  $d(z^2)$ ,  $d(xz)$ ,  $d(x^2-y^2)/C(sp^2)^*$ ,  $\pi^*(1)$ ,  $\pi^*(2)$ ,  $\pi^*(3)$ .

| State | Root | Multiplicity | $\Delta E/\text{nm}$ | $\Delta E/\text{kcal mol}^{-1}$ | CI vector | Contribution |
|-------|------|--------------|----------------------|---------------------------------|-----------|--------------|
| 0     | 0    | 1            | ---                  | ---                             | 222220000 | 0.5840       |
|       |      |              |                      |                                 | 122221000 | 0.1275       |
|       |      |              |                      |                                 | 222210100 | 0.1249       |
| 1     | 0    | 3            | 1025.9               | 27.9                            | 222121000 | 0.7678       |
|       |      |              |                      |                                 | 122122000 | 0.1569       |
| 2     | 1    | 3            | 897.6                | 31.9                            | 222211000 | 0.6015       |
|       |      |              |                      |                                 | 221221000 | 0.1813       |
|       |      |              |                      |                                 | 122212000 | 0.1264       |
| 3     | 2    | 3            | 821.2                | 34.8                            | 221221000 | 0.5802       |
|       |      |              |                      |                                 | 222211000 | 0.1940       |
| 4     | 3    | 3            | 697.4                | 41.0                            | 222120100 | 0.8085       |
| 5     | 1    | 1            | 681.1                | 42.0                            | 222120100 | 0.8079       |
| 6     | 4    | 3            | 678.0                | 42.2                            | 222210100 | 0.5725       |
|       |      |              |                      |                                 | 212221000 | 0.2309       |
| 7     | 5    | 3            | 628.9                | 45.5                            | 212221000 | 0.5196       |
|       |      |              |                      |                                 | 222210100 | 0.2486       |
| 8     | 2    | 1            | 607.6                | 47.1                            | 222210100 | 0.4974       |
|       |      |              |                      |                                 | 221220100 | 0.2488       |
| 9     | 6    | 3            | 553.8                | 51.6                            | 221220100 | 0.7754       |
| 10    | 3    | 1            | 547.2                | 52.2                            | 221220100 | 0.5007       |
|       |      |              |                      |                                 | 222210100 | 0.1516       |
| 11    | 4    | 1            | 475.1                | 60.2                            | 222120010 | 0.7948       |
| 12    | 5    | 1            | 461.2                | 62.0                            | 212220100 | 0.6845       |
|       |      |              |                      |                                 | 221211100 | 0.1008       |
| 13    | 7    | 3            | 455.8                | 62.7                            | 222120010 | 0.7963       |
| 14    | 6    | 1            | 448.5                | 63.8                            | 222211000 | 0.6837       |
| 15    | 7    | 1            | 446.9                | 64.0                            | 222210010 | 0.3695       |
|       |      |              |                      |                                 | 222121000 | 0.1841       |
|       |      |              |                      |                                 | 212221000 | 0.1360       |
| 16    | 8    | 1            | 433.2                | 66.0                            | 212221000 | 0.5154       |
|       |      |              |                      |                                 | 222121000 | 0.1800       |
| 17    | 8    | 3            | 429.1                | 66.6                            | 212220100 | 0.7416       |
| 18    | 9    | 3            | 422.9                | 67.6                            | 222210010 | 0.8139       |
| 19    | 9    | 1            | 413.1                | 69.2                            | 221221000 | 0.7477       |
| 20    | 10   | 1            | 400.5                | 71.4                            | 222121000 | 0.3498       |
|       |      |              |                      |                                 | 222210010 | 0.2407       |





**2B** with Ni–C distance of 3.50 Å (dissociation limit) – CASSCF/NEVPT2 lowest transition energies with CPCM(THF) (10e,8o Active Space) – 25 triplet roots, 15 singlet roots. Active Space Orbitals (in order for CI vector notation below): d(xy), d(yz), d(z<sup>2</sup>), d(xz), d(x<sup>2</sup>-y<sup>2</sup>)/C(sp<sup>2</sup>), d(x<sup>2</sup>-y<sup>2</sup>)/C(sp<sup>2</sup>)\*, π\*(1), π\*(2).

| State | Root | Multiplicity | ΔE/nm   | ΔE/kcal mol <sup>-1</sup> | CI vector | Contribution |
|-------|------|--------------|---------|---------------------------|-----------|--------------|
| 0     | 0    | 1            | ---     | ---                       | 22211110  | 0.7772       |
| 1     | 0    | 3            | 69140.1 | 0.4                       | 22211110  | 0.7940       |
| 2     | 1    | 3            | 9978.8  | 2.9                       | 22121110  | 0.8712       |
| 3     | 1    | 1            | 6981.8  | 4.1                       | 22121110  | 0.9000       |
| 4     | 2    | 3            | 6451.0  | 4.4                       | 22121110  | 0.9172       |
| 5     | 3    | 3            | 5163.0  | 5.5                       | 22211110  | 0.8138       |
| 6     | 4    | 3            | 3842.7  | 7.4                       | 21221110  | 0.8415       |
| 7     | 2    | 1            | 3540.6  | 8.1                       | 21221110  | 0.8332       |
| 8     | 5    | 3            | 3358.9  | 8.5                       | 21221110  | 0.8584       |
| 9     | 3    | 1            | 1436.7  | 19.9                      | 21212110  | 0.4815       |
|       |      |              |         |                           | 12221110  | 0.4360       |
| 10    | 6    | 3            | 1423.4  | 20.1                      | 21212110  | 0.4808       |
|       |      |              |         |                           | 12221110  | 0.4410       |
| 11    | 7    | 3            | 1310.9  | 21.8                      | 12221110  | 0.4561       |
|       |      |              |         |                           | 21212110  | 0.4463       |
| 12    | 4    | 1            | 1229.4  | 23.3                      | 22211101  | 0.7843       |
| 13    | 8    | 3            | 1218.1  | 23.5                      | 22211101  | 0.8060       |
| 14    | 9    | 3            | 1195.0  | 23.9                      | 22121101  | 0.8874       |
| 15    | 5    | 1            | 1188.3  | 24.1                      | 22121101  | 0.8603       |
| 16    | 10   | 3            | 1167.5  | 24.5                      | 22121101  | 0.8885       |
| 17    | 6    | 1            | 1155.8  | 24.7                      | 22220110  | 0.7980       |
| 18    | 11   | 3            | 1138.5  | 25.1                      | 22220110  | 0.8318       |
| 19    | 12   | 3            | 1099.3  | 26.0                      | 22211101  | 0.8464       |
| 20    | 13   | 3            | 1023.5  | 27.9                      | 12212110  | 0.7826       |
|       |      |              |         |                           | 21122110  | 0.1030       |



**2B** with Ni–C distance of 3.50 Å (dissociation limit) – CASSCF/QD-NEVPT2 lowest transition energies with CPCM(THF) (10e,8o Active Space) – 25 triplet roots, 15 singlet roots. Active Space Orbitals (in order for CI vector notation below): d(xy), d(yz), d(z<sup>2</sup>), d(xz), d(x<sup>2</sup>-y<sup>2</sup>)/C(sp<sup>2</sup>), d(x<sup>2</sup>-y<sup>2</sup>)/C(sp<sup>2</sup>)\*, π\*(1), π\*(2).

| State | Root | Multiplicity | ΔE/nm   | ΔE/kcal mol <sup>-1</sup> | CI vector | Contribution |
|-------|------|--------------|---------|---------------------------|-----------|--------------|
| 0     | 0    | 1            | ---     | ---                       | 22211110  | 0.7413       |
| 1     | 0    | 3            | 66445.2 | 0.4                       | 22211110  | 0.7695       |
| 2     | 1    | 3            | 8477.4  | 3.4                       | 22121110  | 0.8735       |
| 3     | 1    | 1            | 6262.1  | 4.6                       | 22121110  | 0.8969       |
| 4     | 2    | 3            | 5834.6  | 4.9                       | 22121110  | 0.9129       |
| 5     | 3    | 3            | 4760.8  | 6.0                       | 22211110  | 0.8247       |
| 6     | 4    | 3            | 3616.0  | 7.9                       | 21221110  | 0.8550       |
| 7     | 2    | 1            | 3349.9  | 8.5                       | 21221110  | 0.8256       |
| 8     | 5    | 3            | 3187.5  | 9.0                       | 21221110  | 0.8522       |
| 9     | 3    | 1            | 1405.7  | 20.3                      | 21212110  | 0.4868       |
|       |      |              |         |                           | 12221110  | 0.4303       |
| 10    | 6    | 3            | 1392.7  | 20.5                      | 21212110  | 0.4869       |
|       |      |              |         |                           | 12221110  | 0.4345       |
| 11    | 7    | 3            | 1285.0  | 22.3                      | 12221110  | 0.4548       |
|       |      |              |         |                           | 21212110  | 0.4535       |
| 12    | 4    | 1            | 1201.6  | 23.8                      | 22211101  | 0.7249       |
| 13    | 8    | 3            | 1190.2  | 24.0                      | 22211101  | 0.7475       |
| 14    | 9    | 3            | 1170.2  | 24.4                      | 22121101  | 0.8462       |
| 15    | 5    | 1            | 1158.2  | 24.7                      | 22121101  | 0.8168       |
| 16    | 10   | 3            | 1139.5  | 25.1                      | 22121101  | 0.8717       |
| 17    | 6    | 1            | 1131.4  | 25.3                      | 22220110  | 0.7379       |
| 18    | 11   | 3            | 1116.7  | 25.6                      | 22220110  | 0.8015       |
| 19    | 12   | 3            | 1079.4  | 26.5                      | 22211101  | 0.8423       |
| 20    | 7    | 1            | 1026.4  | 27.9                      | 12212110  | 0.5926       |
|       |      |              |         |                           | 21221101  | 0.1969       |

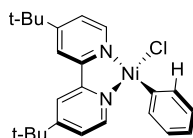

**2B** with Ni–C distance of 1.90 Å (near-equilibrium geometry) – CASSCF/NEVPT2 composition of the singlet ground state with CPCM(THF) (10e,9o Active Space) – 25 triplet roots, 15 singlet roots. Active Space Orbitals (in order for CI vector notation below):  $d(x^2-y^2)/C(sp^2)$ ,  $d(xy)$ ,  $d(yz)$ ,  $d(z^2)$ ,  $d(xz)$ ,  $d(x^2-y^2)/C(sp^2)^*$ ,  $\pi^*(1)$ ,  $\pi^*(2)$ ,  $\pi^*(3)$ .

| CI vector                      | Transition                                                                       | Contribution |
|--------------------------------|----------------------------------------------------------------------------------|--------------|
| 222220000                      | Closed-shell singlet (CSS) $d^8$                                                 | 0.5456       |
| 222210100                      | $d(xz) \rightarrow \pi^*(1)$                                                     | 0.1816       |
| 122221000                      | $d(x^2-y^2)/C(sp^2) \rightarrow d(x^2-y^2)/C(sp^2)^*$                            | 0.1180       |
| 221220100                      | $d(yz) \rightarrow \pi^*(1)$                                                     | 0.0291       |
| 022212100                      | $2x[d(x^2-y^2)/C(sp^2)] + d(xz) \rightarrow 2x[d(x^2-y^2)/C(sp^2)^*] + \pi^*(1)$ | 0.0242       |
| 222210010                      | $d(xz) \rightarrow \pi^*(2)$                                                     | 0.0140       |
| 221220001                      | $d(yz) \rightarrow \pi^*(3)$                                                     | 0.0123       |
| 222022000                      | $2x[d(z^2)] \rightarrow 2x[d(x^2-y^2)/C(sp^2)^*]$                                | 0.0106       |
| <b>Sum of CSS</b>              |                                                                                  | <b>55 %</b>  |
| <b>Sum of all MLCT</b>         |                                                                                  | <b>24 %</b>  |
| <b>Sum of all d-d</b>          |                                                                                  | <b>13 %</b>  |
| <b>Sum of mixed MLCT + d-d</b> |                                                                                  | <b>2 %</b>   |

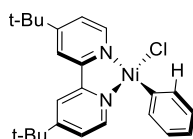

**2B** with Ni–C distance of 1.90 Å (near-equilibrium geometry) – CASSCF/QD-NEVPT2 composition of the singlet ground state with CPCM(THF) (10e,9o Active Space) – 25 triplet roots, 15 singlet roots. Active Space Orbitals (in order for CI vector notation below):  $d(x^2-y^2)/C(sp^2)$ ,  $d(xy)$ ,  $d(yz)$ ,  $d(z^2)$ ,  $d(xz)$ ,  $d(x^2-y^2)/C(sp^2)^*$ ,  $\pi^*(1)$ ,  $\pi^*(2)$ ,  $\pi^*(3)$ .

| CI vector                      | Transition                                                                       | Contribution |
|--------------------------------|----------------------------------------------------------------------------------|--------------|
| 222220000                      | Closed-shell singlet (CSS) $d^8$                                                 | 0.5840       |
| 122221000                      | $d(x^2-y^2)/C(sp^2) \rightarrow d(x^2-y^2)/C(sp^2)^*$                            | 0.1275       |
| 222210100                      | $d(xz) \rightarrow \pi^*(1)$                                                     | 0.1249       |
| 221220100                      | $d(yz) \rightarrow \pi^*(1)$                                                     | 0.0242       |
| 222210010                      | $d(xz) \rightarrow \pi^*(2)$                                                     | 0.0220       |
| 022212100                      | $2x[d(x^2-y^2)/C(sp^2)] + d(xz) \rightarrow 2x[d(x^2-y^2)/C(sp^2)^*] + \pi^*(1)$ | 0.0170       |
| 222121000                      | $d(z^2) \rightarrow d(x^2-y^2)/C(sp^2)^*$                                        | 0.0165       |
| 221220001                      | $d(yz) \rightarrow \pi^*(3)$                                                     | 0.0141       |
| 222022000                      | $2x[d(z^2)] \rightarrow 2x[d(x^2-y^2)/C(sp^2)^*]$                                | 0.0110       |
| <b>Sum of CSS</b>              |                                                                                  | <b>58 %</b>  |
| <b>Sum of all MLCT</b>         |                                                                                  | <b>19 %</b>  |
| <b>Sum of all d-d</b>          |                                                                                  | <b>16 %</b>  |
| <b>Sum of mixed MLCT + d-d</b> |                                                                                  | <b>2 %</b>   |



**2B** with Ni–C distance of 3.50 Å (dissociation limit) – CASSCF/NEVPT2 composition of the singlet ground state with CPCM(THF) (10e,8o Active Space) – 25 triplet roots, 15 singlet roots. Active Space Orbitals (in order for CI vector notation below):  $d(xy)$ ,  $d(yz)$ ,  $d(z^2)$ ,  $d(xz)$ ,  $d(x^2-y^2)/C(sp^2)$ ,  $d(x^2-y^2)/C(sp^2)^*$ ,  $\pi^*(1)$ ,  $\pi^*(2)$ .

| CI vector                      | Transition                                                               | Contribution |
|--------------------------------|--------------------------------------------------------------------------|--------------|
| 22211110                       | $d(xz) + d(x^2-y^2)/C(sp^2) \rightarrow d(x^2-y^2)/C(sp^2)^* + \pi^*(1)$ | 0.7772       |
| 22112110                       | $d(z^2) + d(xz) \rightarrow d(x^2-y^2)/C(sp^2)^* + \pi^*(1)$             | 0.0471       |
| 22221100                       | $d(x^2-y^2)/C(sp^2) \rightarrow d(x^2-y^2)/C(sp^2)^*$                    | 0.0410       |
| 21221110                       | $d(yz) + d(x^2-y^2)/C(sp^2) \rightarrow d(x^2-y^2)/C(sp^2)^* + \pi^*(1)$ | 0.0407       |
| 11222110                       | $d(xy) + d(yz) \rightarrow d(x^2-y^2)/C(sp^2)^* + \pi^*(1)$              | 0.0386       |
| 22212010                       | $d(xz) \rightarrow \pi^*(1)$                                             | 0.0189       |
| <b>Sum of CSS</b>              |                                                                          | <b>0 %</b>   |
| <b>Sum of all MLCT</b>         |                                                                          | <b>2 %</b>   |
| <b>Sum of all d-d</b>          |                                                                          | <b>4 %</b>   |
| <b>Sum of mixed MLCT + d-d</b> |                                                                          | <b>90 %</b>  |

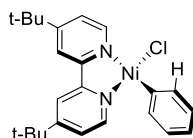

**2B** with Ni–C distance of 3.50 Å (dissociation limit) – CASSCF/QD-NEVPT2 composition of the singlet ground state with CPCM(THF) (10e,8o Active Space) – 25 triplet roots, 15 singlet roots. Active Space Orbitals (in order for CI vector notation below):  $d(xy)$ ,  $d(yz)$ ,  $d(z^2)$ ,  $d(xz)$ ,  $d(x^2-y^2)/C(sp^2)$ ,  $d(x^2-y^2)/C(sp^2)^*$ ,  $\pi^*(1)$ ,  $\pi^*(2)$ .

| CI vector                      | Transition                                                               | Contribution |
|--------------------------------|--------------------------------------------------------------------------|--------------|
| 22211110                       | $d(xz) + d(x^2-y^2)/C(sp^2) \rightarrow d(x^2-y^2)/C(sp^2)^* + \pi^*(1)$ | 0.74133      |
| 22221100                       | $d(x^2-y^2)/C(sp^2) \rightarrow d(x^2-y^2)/C(sp^2)^*$                    | 0.04960      |
| 22112110                       | $d(z^2) + d(xz) \rightarrow d(x^2-y^2)/C(sp^2)^* + \pi^*(1)$             | 0.04593      |
| 21221110                       | $d(yz) + d(x^2-y^2)/C(sp^2) \rightarrow d(x^2-y^2)/C(sp^2)^* + \pi^*(1)$ | 0.04405      |
| 11222110                       | $d(xy) + d(yz) \rightarrow d(x^2-y^2)/C(sp^2)^* + \pi^*(1)$              | 0.03338      |
| 22211101                       | $d(xz) + d(x^2-y^2)/C(sp^2) \rightarrow d(x^2-y^2)/C(sp^2)^* + \pi^*(2)$ | 0.02664      |
| 22212010                       | $d(xz) \rightarrow \pi^*(1)$                                             | 0.01909      |
| <b>Sum of CSS</b>              |                                                                          | <b>0 %</b>   |
| <b>Sum of all MLCT</b>         |                                                                          | <b>2 %</b>   |
| <b>Sum of all d-d</b>          |                                                                          | <b>5 %</b>   |
| <b>Sum of mixed MLCT + d-d</b> |                                                                          | <b>89 %</b>  |



**2B** – CASSCF/NEVPT2 spin-orbit corrected absorption transitions for the CPCM(THF) phase spectrum (10e,9o Active Space) – 25 triplet roots, 15 singlet roots.

| <i>E</i> /nm | <i>E</i> /kcal mol <sup>-1</sup> | <i>f</i> <sub>osc</sub> | <i>E</i> /nm | <i>E</i> /kcal mol <sup>-1</sup> | <i>f</i> <sub>osc</sub> |
|--------------|----------------------------------|-------------------------|--------------|----------------------------------|-------------------------|
| 799.5        | 35.8                             | 0.0000553               | 410.1        | 69.7                             | 0.0002082               |
| 713.6        | 40.1                             | 0.0001600               | 409.4        | 69.8                             | 0.0000677               |
| 713.2        | 40.1                             | 0.0000000               | 405.8        | 70.5                             | 0.0756448               |
| 706.8        | 40.5                             | 0.0054254               | 378.0        | 75.6                             | 0.0112399               |
| 699.6        | 40.9                             | 0.0008986               | 377.9        | 75.7                             | 0.0047785               |
| 647.9        | 44.1                             | 0.0050859               | 377.4        | 75.8                             | 0.0001328               |
| 645.4        | 44.3                             | 0.0000003               | 377.1        | 75.8                             | 0.0041179               |
| 643.6        | 44.4                             | 0.0001685               | 375.7        | 76.1                             | 0.0019773               |
| 626.4        | 45.6                             | 0.0159925               | 375.1        | 76.2                             | 0.0218253               |
| 625.4        | 45.7                             | 0.0000193               | 372.7        | 76.7                             | 0.0000044               |
| 625.1        | 45.7                             | 0.0000001               | 372.6        | 76.7                             | 0.0004174               |
| 605.1        | 47.3                             | 0.0735360               | 355.1        | 80.5                             | 0.0787551               |
| 557.7        | 51.3                             | 0.0369130               | 333.0        | 85.9                             | 0.0000210               |
| 554.0        | 51.6                             | 0.0000008               | 332.8        | 85.9                             | 0.0000045               |
| 553.6        | 51.7                             | 0.0000444               | 330.7        | 86.4                             | 0.0000115               |
| 541.9        | 52.8                             | 0.2333280               | 326.3        | 87.6                             | 0.0001015               |
| 459.5        | 62.2                             | 0.0053875               | 326.2        | 87.7                             | 0.0000833               |
| 458.4        | 62.4                             | 0.0001951               | 325.9        | 87.7                             | 0.0000372               |
| 452.8        | 63.1                             | 0.0076765               | 324.2        | 88.2                             | 0.0000000               |
| 449.1        | 63.7                             | 0.0001221               | 322.6        | 88.6                             | 0.0000167               |
| 441.7        | 64.7                             | 0.0044719               | 318.3        | 89.8                             | 0.0001216               |
| 430.1        | 66.5                             | 0.0000058               | 316.7        | 90.3                             | 0.0000426               |
| 430.1        | 66.5                             | 0.0000326               | 316.6        | 90.3                             | 0.0000005               |
| 429.7        | 66.5                             | 0.0000012               | 316.6        | 90.3                             | 0.0000321               |
| 429.6        | 66.5                             | 0.0006666               | 316.6        | 90.3                             | 0.0001643               |
| 429.4        | 66.6                             | 0.0002837               | 313.0        | 91.4                             | 0.0000035               |
| 423.2        | 67.6                             | 0.0000395               | 308.4        | 92.7                             | 0.0000013               |
| 421.1        | 67.9                             | 0.0040174               | 307.6        | 93.0                             | 0.0000026               |
| 419.2        | 68.2                             | 0.0441516               |              |                                  |                         |



**2B** – CASSCF/QD-NEVPT2 spin-orbit corrected absorption transitions for the CPCM(THF) phase spectrum (10e,9o Active Space) – 25 triplet roots, 15 singlet roots.

| <i>E</i> /nm | <i>E</i> /kcal mol <sup>-1</sup> | <i>f</i> <sub>osc</sub> | <i>E</i> /nm | <i>E</i> /kcal mol <sup>-1</sup> | <i>f</i> <sub>osc</sub> |
|--------------|----------------------------------|-------------------------|--------------|----------------------------------|-------------------------|
| 794.3        | 36.0                             | 0.0000385               | 420.1        | 68.1                             | 0.0003888               |
| 712.1        | 40.2                             | 0.0001757               | 411.9        | 69.4                             | 0.0006827               |
| 712.1        | 40.2                             | 0.0000045               | 400.0        | 71.5                             | 0.1292814               |
| 702.1        | 40.7                             | 0.0033452               | 378.4        | 75.6                             | 0.0020776               |
| 700.9        | 40.8                             | 0.0024356               | 378.4        | 75.6                             | 0.0000884               |
| 666.1        | 42.9                             | 0.0000562               | 378.3        | 75.6                             | 0.0034397               |
| 665.9        | 42.9                             | 0.0021472               | 375.9        | 76.1                             | 0.0014447               |
| 661.6        | 43.2                             | 0.0003926               | 375.4        | 76.2                             | 0.0011323               |
| 624.9        | 45.8                             | 0.0000488               | 375.2        | 76.2                             | 0.0048228               |
| 624.6        | 45.8                             | 0.0069733               | 375.0        | 76.2                             | 0.0009868               |
| 624.2        | 45.8                             | 0.0000515               | 372.0        | 76.9                             | 0.0116913               |
| 602.1        | 47.5                             | 0.0835467               | 353.3        | 80.9                             | 0.0048063               |
| 551.1        | 51.9                             | 0.0572286               | 353.3        | 80.9                             | 0.0012139               |
| 548.2        | 52.2                             | 0.0000305               | 353.2        | 80.9                             | 0.0001900               |
| 547.7        | 52.2                             | 0.0000486               | 348.3        | 82.1                             | 0.0900471               |
| 539.4        | 53.0                             | 0.2175792               | 323.2        | 88.5                             | 0.0001679               |
| 476.9        | 60.0                             | 0.0001619               | 322.7        | 88.6                             | 0.0000071               |
| 460.5        | 62.1                             | 0.0005656               | 319.4        | 89.5                             | 0.0000010               |
| 458.8        | 62.3                             | 0.0064505               | 317.1        | 90.2                             | 0.0000393               |
| 458.6        | 62.3                             | 0.0008539               | 316.8        | 90.2                             | 0.0001101               |
| 458.5        | 62.4                             | 0.0005151               | 316.7        | 90.3                             | 0.0001944               |
| 447.0        | 64.0                             | 0.0035433               | 315.1        | 90.7                             | 0.0001556               |
| 442.2        | 64.7                             | 0.0048121               | 311.5        | 91.8                             | 0.0000973               |
| 431.9        | 66.2                             | 0.0000294               | 309.7        | 92.3                             | 0.0004006               |
| 427.1        | 66.9                             | 0.0000128               | 306.7        | 93.2                             | 0.0000328               |
| 427.1        | 67.0                             | 0.0017963               | 303.0        | 94.4                             | 0.0000351               |
| 426.8        | 67.0                             | 0.0000862               | 301.9        | 94.7                             | 0.0000044               |
| 421.1        | 67.9                             | 0.0000096               | 300.2        | 95.2                             | 0.0001988               |
| 420.6        | 68.0                             | 0.0000103               |              |                                  |                         |



**2B** – TD-DFT (B3LYP) absorption transitions (singlets only) for the CPCM(THF) phase spectrum.

| <i>E</i> /nm | <i>E</i> /kcal mol <sup>-1</sup> | <i>f</i> <sub>osc</sub> | <i>E</i> /nm | <i>E</i> /kcal mol <sup>-1</sup> | <i>f</i> <sub>osc</sub> |
|--------------|----------------------------------|-------------------------|--------------|----------------------------------|-------------------------|
| 764.9        | 37.4                             | 0.0000000               | 371.4        | 77.0                             | 0.0000000               |
| 600.9        | 47.6                             | 0.0000000               | 370.3        | 77.2                             | 0.0003848               |
| 589.4        | 48.5                             | 0.0000000               | 370.2        | 77.2                             | 0.0000108               |
| 550.7        | 51.9                             | 0.0000000               | 366.6        | 78.0                             | 0.0136999               |
| 535.1        | 53.4                             | 0.0007501               | 366.4        | 78.0                             | 0.0000000               |
| 502.7        | 56.9                             | 0.0072053               | 360.5        | 79.3                             | 0.0000000               |
| 490.1        | 58.3                             | 0.0000000               | 340.1        | 84.1                             | 0.0014672               |
| 490.0        | 58.3                             | 0.0001204               | 336.2        | 85.1                             | 0.0209975               |
| 487.2        | 58.7                             | 0.0011137               | 334.9        | 85.4                             | 0.0000000               |
| 473.3        | 60.4                             | 0.0245223               | 334.8        | 85.4                             | 0.0000610               |
| 460.3        | 62.1                             | 0.0000000               | 334.6        | 85.4                             | 0.0000000               |
| 451.0        | 63.4                             | 0.0000212               | 331.0        | 86.4                             | 0.0001762               |
| 450.8        | 63.4                             | 0.0001539               | 330.4        | 86.5                             | 0.0128130               |
| 443.0        | 64.5                             | 0.0000000               | 328.9        | 86.9                             | 0.0000000               |
| 436.1        | 65.6                             | 0.0001472               | 328.5        | 87.0                             | 0.0000000               |
| 432.8        | 66.1                             | 0.0000000               | 316.7        | 90.3                             | 0.0520096               |
| 430.5        | 66.4                             | 0.0628299               | 309.2        | 92.5                             | 0.0000000               |
| 416.7        | 68.6                             | 0.0000000               | 308.4        | 92.7                             | 0.0000000               |
| 414.4        | 69.0                             | 0.0002393               | 304.4        | 93.9                             | 0.0000000               |
| 389.5        | 73.4                             | 0.0000000               | 302.8        | 94.4                             | 0.0000000               |
| 386.6        | 74.0                             | 0.0092081               | 302.1        | 94.6                             | 0.0007255               |
| 379.4        | 75.4                             | 0.0000000               |              |                                  |                         |



**2B** – TD-DFT (B3LYP) absorption transitions (singlets only) for the CPCM(Toluene) phase spectrum.

| <i>E</i> /nm | <i>E</i> /kcal mol <sup>-1</sup> | <i>f</i> <sub>osc</sub> | <i>E</i> /nm | <i>E</i> /kcal mol <sup>-1</sup> | <i>f</i> <sub>osc</sub> |
|--------------|----------------------------------|-------------------------|--------------|----------------------------------|-------------------------|
| 747.5        | 38.3                             | 0.0000000               | 404.9        | 70.6                             | 0.0231058               |
| 695.9        | 41.1                             | 0.0000000               | 385.2        | 74.2                             | 0.0000000               |
| 670.3        | 42.7                             | 0.0006102               | 383.5        | 74.5                             | 0.0000704               |
| 643.6        | 44.4                             | 0.0000000               | 382.3        | 74.8                             | 0.0000000               |
| 588.9        | 48.6                             | 0.0000000               | 381.9        | 74.9                             | 0.0000000               |
| 570.8        | 50.1                             | 0.0000000               | 378.4        | 75.6                             | 0.0015694               |
| 544.1        | 52.6                             | 0.0004860               | 371.6        | 76.9                             | 0.0000000               |
| 529.1        | 54.0                             | 0.0176466               | 370.8        | 77.1                             | 0.0092365               |
| 528.7        | 54.1                             | 0.0000000               | 367.3        | 77.8                             | 0.0000000               |
| 515.9        | 55.4                             | 0.0000000               | 365.0        | 78.3                             | 0.0249818               |
| 496.1        | 57.6                             | 0.0000000               | 363.7        | 78.6                             | 0.0000000               |
| 494.2        | 57.9                             | 0.0006866               | 358.7        | 79.7                             | 0.0001205               |
| 484.2        | 59.0                             | 0.0000218               | 351.3        | 81.4                             | 0.0005934               |
| 474.1        | 60.3                             | 0.0089933               | 350.4        | 81.6                             | 0.0509278               |
| 472.7        | 60.5                             | 0.0027699               | 342.2        | 83.6                             | 0.0000000               |
| 471.2        | 60.7                             | 0.0582278               | 338.1        | 84.6                             | 0.0000000               |
| 466.3        | 61.3                             | 0.0000000               | 337.0        | 84.8                             | 0.0009801               |
| 463.3        | 61.7                             | 0.0002079               | 333.0        | 85.9                             | 0.0000000               |
| 450.5        | 63.5                             | 0.0076628               | 332.9        | 85.9                             | 0.0000000               |
| 449.8        | 63.6                             | 0.0008759               | 325.4        | 87.9                             | 0.0000000               |
| 429.3        | 66.6                             | 0.0000000               | 322.7        | 88.6                             | 0.0035716               |
| 419.8        | 68.1                             | 0.0002479               | 315.7        | 90.6                             | 0.0000000               |
| 415.8        | 68.8                             | 0.0000000               | 307.7        | 92.9                             | 0.0000000               |
| 407.8        | 70.1                             | 0.0000000               | 306.3        | 93.3                             | 0.0710369               |
| 406.4        | 70.4                             | 0.0000111               | 304.8        | 93.8                             | 0.0000000               |



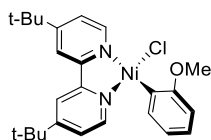

**3B** with Ni–C distance of 1.90 Å (near-equilibrium geometry) – CASSCF/NEVPT2 lowest transition energies with CPCM(THF) (10e,9o Active Space) – 25 triplet roots, 15 singlet roots. Active Space Orbitals (in order for CI vector notation below):  $d(x^2-y^2)/C(sp^2)$ ,  $d(xy)$ ,  $d(yz)$ ,  $d(z^2)$ ,  $d(xz)$ ,  $d(x^2-y^2)/C(sp^2)^*$ ,  $\pi^*(1)$ ,  $\pi^*(2)$ ,  $\pi^*(3)$ .

| State | Root | Multiplicity | $\Delta E/\text{nm}$ | $\Delta E/\text{kcal mol}^{-1}$ | CI vector | Contribution |
|-------|------|--------------|----------------------|---------------------------------|-----------|--------------|
| 0     | 0    | 1            | ---                  | ---                             | 222220000 | 0.5786       |
|       |      |              |                      |                                 | 222210100 | 0.1373       |
|       |      |              |                      |                                 | 122221000 | 0.1302       |
| 1     | 0    | 3            | 1085.8               | 26.3                            | 222121000 | 0.7866       |
|       |      |              |                      |                                 | 122122000 | 0.1613       |
| 2     | 1    | 3            | 932.7                | 30.7                            | 222211000 | 0.5926       |
|       |      |              |                      |                                 | 221221000 | 0.1933       |
|       |      |              |                      |                                 | 122212000 | 0.1246       |
| 3     | 2    | 3            | 853.9                | 33.5                            | 221221000 | 0.5720       |
|       |      |              |                      |                                 | 222211000 | 0.2039       |
| 4     | 3    | 3            | 680.4                | 42.0                            | 222120100 | 0.8311       |
| 5     | 1    | 1            | 666.2                | 42.9                            | 222120100 | 0.8278       |
| 6     | 4    | 3            | 641.0                | 44.6                            | 212221000 | 0.6996       |
|       |      |              |                      |                                 | 221212000 | 0.1548       |
|       |      |              |                      |                                 | 112222000 | 0.1061       |
| 7     | 5    | 3            | 627.3                | 45.6                            | 222210100 | 0.8298       |
| 8     | 2    | 1            | 595.2                | 48.0                            | 222210100 | 0.4886       |
|       |      |              |                      |                                 | 221220100 | 0.2613       |
| 9     | 6    | 3            | 546.7                | 52.3                            | 221220100 | 0.8022       |
| 10    | 3    | 1            | 527.9                | 54.2                            | 221220100 | 0.4983       |
|       |      |              |                      |                                 | 222210100 | 0.1705       |
| 11    | 4    | 1            | 469.0                | 61.0                            | 222121000 | 0.6396       |
| 12    | 5    | 1            | 468.4                | 61.0                            | 212220100 | 0.3220       |
|       |      |              |                      |                                 | 221221000 | 0.2667       |
|       |      |              |                      |                                 | 222211000 | 0.1612       |
| 13    | 6    | 1            | 449.9                | 63.5                            | 222211000 | 0.5975       |
|       |      |              |                      |                                 | 221221000 | 0.1960       |
| 14    | 7    | 1            | 447.1                | 63.9                            | 212221000 | 0.7119       |
| 15    | 7    | 3            | 433.9                | 65.9                            | 222120010 | 0.8234       |
| 16    | 8    | 1            | 432.3                | 66.1                            | 222120010 | 0.8171       |
| 17    | 8    | 3            | 415.4                | 68.8                            | 222210010 | 0.8223       |
| 18    | 9    | 1            | 414.1                | 69.0                            | 212220100 | 0.3980       |
|       |      |              |                      |                                 | 221221000 | 0.3421       |
| 19    | 9    | 3            | 409.0                | 69.9                            | 212220100 | 0.6609       |
| 20    | 10   | 1            | 399.6                | 71.6                            | 222210010 | 0.7394       |



**3B** with Ni–C distance of 1.90 Å (near-equilibrium geometry) – CASSCF/QD-NEVPT2 lowest transition energies with CPCM(THF) (10e,9o Active Space) – 25 triplet roots, 15 singlet roots. Active Space Orbitals (in order for CI vector notation below):  $d(x^2-y^2)/C(sp^2)$ ,  $d(xy)$ ,  $d(yz)$ ,  $d(z^2)$ ,  $d(xz)$ ,  $d(x^2-y^2)/C(sp^2)^*$ ,  $\pi^*(1)$ ,  $\pi^*(2)$ ,  $\pi^*(3)$ .

| State | Root | Multiplicity | $\Delta E/\text{nm}$ | $\Delta E/\text{kcal mol}^{-1}$ | CI vector | Contribution |
|-------|------|--------------|----------------------|---------------------------------|-----------|--------------|
| 0     | 0    | 1            | ---                  | ---                             | 222220000 | 0.5939       |
|       |      |              |                      |                                 | 122221000 | 0.1286       |
|       |      |              |                      |                                 | 222210100 | 0.1051       |
| 1     | 0    | 3            | 1078.3               | 26.5                            | 222121000 | 0.7575       |
|       |      |              |                      |                                 | 122122000 | 0.1515       |
| 2     | 1    | 3            | 932.4                | 30.7                            | 222211000 | 0.6055       |
|       |      |              |                      |                                 | 221221000 | 0.1573       |
|       |      |              |                      |                                 | 122212000 | 0.1249       |
| 3     | 2    | 3            | 847.1                | 33.8                            | 221221000 | 0.5922       |
|       |      |              |                      |                                 | 222211000 | 0.1796       |
| 4     | 3    | 3            | 677.6                | 42.2                            | 212221000 | 0.5341       |
|       |      |              |                      |                                 | 222120100 | 0.2426       |
| 5     | 4    | 3            | 674.8                | 42.4                            | 222120100 | 0.5827       |
|       |      |              |                      |                                 | 212221000 | 0.2271       |
| 6     | 1    | 1            | 661.6                | 43.2                            | 222120100 | 0.8239       |
| 7     | 5    | 3            | 622.7                | 45.9                            | 222210100 | 0.8183       |
| 8     | 2    | 1            | 592.2                | 48.3                            | 222210100 | 0.5286       |
|       |      |              |                      |                                 | 221220100 | 0.2271       |
| 9     | 6    | 3            | 541.3                | 52.8                            | 221220100 | 0.7968       |
| 10    | 3    | 1            | 527.8                | 54.2                            | 221220100 | 0.5247       |
|       |      |              |                      |                                 | 222210100 | 0.1483       |
| 11    | 4    | 1            | 474.0                | 60.3                            | 212220100 | 0.5626       |
|       |      |              |                      |                                 | 221211100 | 0.1015       |
| 12    | 5    | 1            | 468.5                | 61.0                            | 222121000 | 0.5290       |
|       |      |              |                      |                                 | 212221000 | 0.1799       |
| 13    | 6    | 1            | 450.4                | 63.5                            | 222211000 | 0.6457       |
| 14    | 7    | 1            | 445.3                | 64.2                            | 212221000 | 0.5940       |
|       |      |              |                      |                                 | 222121000 | 0.1154       |
| 15    | 7    | 3            | 434.4                | 65.8                            | 212220100 | 0.7219       |
| 16    | 8    | 3            | 431.2                | 66.3                            | 222120010 | 0.8016       |
| 17    | 8    | 1            | 429.4                | 66.6                            | 222120010 | 0.7935       |
| 18    | 9    | 3            | 412.6                | 69.3                            | 222210010 | 0.8196       |
| 19    | 9    | 1            | 404.3                | 70.7                            | 221221000 | 0.5796       |
|       |      |              |                      |                                 | 212220100 | 0.1243       |
| 20    | 10   | 1            | 393.4                | 72.7                            | 222210010 | 0.5087       |



**3B** with Ni–C distance of 3.50 Å (dissociation limit) – CASSCF/NEVPT2 lowest transition energies with CPCM(THF) (10e,8o Active Space) – 25 triplet roots, 15 singlet roots. Active Space Orbitals (in order for CI vector notation below): d(xy), d(yz), d(z<sup>2</sup>), d(xz), d(x<sup>2</sup>-y<sup>2</sup>)/C(sp<sup>2</sup>), d(x<sup>2</sup>-y<sup>2</sup>)/C(sp<sup>2</sup>)\*, π\*(1), π\*(2).

| State | Root | Multiplicity | ΔE/nm    | ΔE/kcal mol <sup>-1</sup> | CI vector | Contribution |
|-------|------|--------------|----------|---------------------------|-----------|--------------|
| 0     | 0    | 1            | ---      | ---                       | 22211110  | 0.6940       |
|       |      |              |          |                           | 22121110  | 0.1643       |
| 1     | 0    | 3            | 711917.0 | 0.0                       | 22211110  | 0.7287       |
|       |      |              |          |                           | 22121110  | 0.1322       |
| 2     | 1    | 3            | 14938.8  | 1.9                       | 22121110  | 0.9699       |
| 3     | 1    | 1            | 10484.0  | 2.7                       | 22121110  | 0.8135       |
|       |      |              |          |                           | 22211110  | 0.1364       |
| 4     | 2    | 3            | 9875.0   | 2.9                       | 22121110  | 0.8518       |
|       |      |              |          |                           | 22211110  | 0.1089       |
| 5     | 3    | 3            | 6497.9   | 4.4                       | 22211110  | 0.9061       |
| 6     | 4    | 3            | 3953.1   | 7.2                       | 21221110  | 0.8544       |
| 7     | 2    | 1            | 3891.3   | 7.3                       | 21221110  | 0.8093       |
| 8     | 5    | 3            | 3829.5   | 7.5                       | 21221110  | 0.8170       |
| 9     | 3    | 1            | 2710.0   | 10.6                      | 22220110  | 0.8816       |
| 10    | 6    | 3            | 2692.1   | 10.6                      | 22220110  | 0.8931       |
| 11    | 7    | 3            | 1373.0   | 20.8                      | 22121101  | 0.9474       |
| 12    | 4    | 1            | 1266.1   | 22.6                      | 22211101  | 0.8448       |
| 13    | 5    | 1            | 1259.1   | 22.7                      | 22121101  | 0.9606       |
| 14    | 8    | 3            | 1250.4   | 22.9                      | 22121101  | 0.9558       |
| 15    | 9    | 3            | 1244.5   | 23.0                      | 22211101  | 0.7974       |
| 16    | 6    | 1            | 1240.0   | 23.1                      | 12221110  | 0.5807       |
|       |      |              |          |                           | 21212110  | 0.3353       |
| 17    | 10   | 3            | 1236.9   | 23.1                      | 12221110  | 0.5839       |
|       |      |              |          |                           | 21212110  | 0.3351       |
| 18    | 11   | 3            | 1198.9   | 23.8                      | 12221110  | 0.6090       |
|       |      |              |          |                           | 21212110  | 0.3197       |
| 19    | 12   | 3            | 1127.6   | 25.4                      | 22211101  | 0.8087       |
| 20    | 13   | 3            | 1013.9   | 28.2                      | 21221101  | 0.8444       |



**3B** with Ni–C distance of 3.50 Å (dissociation limit) – CASSCF/QD-NEVPT2 lowest transition energies with CPCM(THF) (10e,8o Active Space) – 25 triplet roots, 15 singlet roots. Active Space Orbitals (in order for CI vector notation below): d(xy), d(yz), d(z<sup>2</sup>), d(xz), d(x<sup>2</sup>-y<sup>2</sup>)/C(sp<sup>2</sup>), d(x<sup>2</sup>-y<sup>2</sup>)/C(sp<sup>2</sup>)\*, π\*(1), π\*(2).

| State | Root | Multiplicity | ΔE/nm   | ΔE/kcal mol <sup>-1</sup> | CI vector | Contribution |
|-------|------|--------------|---------|---------------------------|-----------|--------------|
| 0     | 0    | 1            | ---     | ---                       | 22211110  | 0.6759       |
| 1     | 0    | 3            | 16954.9 | 1.7                       | 22211110  | 0.7599       |
| 2     | 1    | 3            | 7157.7  | 4.0                       | 22121110  | 0.8827       |
| 3     | 1    | 1            | 5804.8  | 4.9                       | 22121110  | 0.8794       |
| 4     | 2    | 3            | 4524.5  | 6.3                       | 22121110  | 0.9784       |
| 5     | 3    | 3            | 4345.6  | 6.6                       | 22211110  | 0.7949       |
| 6     | 4    | 3            | 3252.7  | 8.8                       | 21221110  | 0.8209       |
| 7     | 2    | 1            | 3166.1  | 9.0                       | 21221110  | 0.7710       |
| 8     | 5    | 3            | 2764.0  | 10.3                      | 21221110  | 0.8667       |
| 9     | 3    | 1            | 1289.1  | 22.2                      | 21212110  | 0.4410       |
|       |      |              |         |                           | 12221110  | 0.4144       |
| 10    | 6    | 3            | 1253.7  | 22.8                      | 21212110  | 0.4640       |
|       |      |              |         |                           | 12221110  | 0.4522       |
| 11    | 7    | 3            | 1208.7  | 23.7                      | 22220110  | 0.6853       |
| 12    | 4    | 1            | 1191.6  | 24.0                      | 22211101  | 0.5548       |
|       |      |              |         |                           | 22220110  | 0.1447       |
| 13    | 5    | 1            | 1179.8  | 24.2                      | 22220110  | 0.6356       |
|       |      |              |         |                           | 22211101  | 0.1454       |
| 14    | 8    | 3            | 1165.3  | 24.5                      | 12221110  | 0.4108       |
|       |      |              |         |                           | 21212110  | 0.3831       |
|       |      |              |         |                           | 22220110  | 0.1134       |
| 15    | 9    | 3            | 1147.2  | 24.9                      | 22121101  | 0.8612       |
| 16    | 6    | 1            | 1139.3  | 25.1                      | 22121101  | 0.8488       |
| 17    | 10   | 3            | 1128.9  | 25.3                      | 22211101  | 0.7524       |
| 18    | 11   | 3            | 1077.5  | 26.5                      | 22121101  | 0.9425       |
| 19    | 12   | 3            | 1038.0  | 27.5                      | 22211101  | 0.8061       |
| 20    | 7    | 1            | 962.8   | 29.7                      | 21221101  | 0.7467       |



**3B** with Ni–C distance of 1.90 Å (near-equilibrium geometry) – CASSCF/NEVPT2 composition of the singlet ground state with CPCM(THF) (10e,9o Active Space) – 25 triplet roots, 15 singlet roots. Active Space Orbitals (in order for CI vector notation below):  $d(x^2-y^2)/C(sp^2)$ ,  $d(xy)$ ,  $d(yz)$ ,  $d(z^2)$ ,  $d(xz)$ ,  $d(x^2-y^2)/C(sp^2)^*$ ,  $\pi^*(1)$ ,  $\pi^*(2)$ ,  $\pi^*(3)$ .

| CI vector                      | Transition                                                                       | Contribution |
|--------------------------------|----------------------------------------------------------------------------------|--------------|
| 222220000                      | Closed-shell singlet (CSS) $d^8$                                                 | 0.5786       |
| 222210100                      | $d(xz) \rightarrow \pi^*(1)$                                                     | 0.1373       |
| 122221000                      | $d(x^2-y^2)/C(sp^2) \rightarrow d(x^2-y^2)/C(sp^2)^*$                            | 0.1302       |
| 221220100                      | $d(yz) \rightarrow \pi^*(1)$                                                     | 0.0290       |
| 022212100                      | $2x[d(x^2-y^2)/C(sp^2)] + d(xz) \rightarrow 2x[d(x^2-y^2)/C(sp^2)^*] + \pi^*(1)$ | 0.0185       |
| 222210010                      | $d(xz) \rightarrow \pi^*(2)$                                                     | 0.0135       |
| 222022000                      | $2x[d(z^2)] \rightarrow 2x[d(x^2-y^2)/C(sp^2)^*]$                                | 0.0125       |
| 221220001                      | $d(yz) \rightarrow \pi^*(3)$                                                     | 0.0114       |
| <b>Sum of CSS</b>              |                                                                                  | <b>58 %</b>  |
| <b>Sum of all MLCT</b>         |                                                                                  | <b>19 %</b>  |
| <b>Sum of all d-d</b>          |                                                                                  | <b>14 %</b>  |
| <b>Sum of mixed MLCT + d-d</b> |                                                                                  | <b>2 %</b>   |

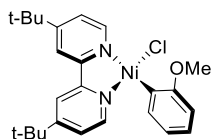

**3B** with Ni–C distance of 1.90 Å (near-equilibrium geometry) – CASSCF/QD-NEVPT2 composition of the singlet ground state with CPCM(THF) (10e,9o Active Space) – 25 triplet roots, 15 singlet roots. Active Space Orbitals (in order for CI vector notation below):  $d(x^2-y^2)/C(sp^2)$ ,  $d(xy)$ ,  $d(yz)$ ,  $d(z^2)$ ,  $d(xz)$ ,  $d(x^2-y^2)/C(sp^2)^*$ ,  $\pi^*(1)$ ,  $\pi^*(2)$ ,  $\pi^*(3)$ .

| CI vector                      | Transition                                                                       | Contribution |
|--------------------------------|----------------------------------------------------------------------------------|--------------|
| 222220000                      | Closed-shell singlet (CSS) $d^8$                                                 | 0.5939       |
| 122221000                      | $d(x^2-y^2)/C(sp^2) \rightarrow d(x^2-y^2)/C(sp^2)^*$                            | 0.1286       |
| 222210100                      | $d(xz) \rightarrow \pi^*(1)$                                                     | 0.1051       |
| 221220100                      | $d(yz) \rightarrow \pi^*(1)$                                                     | 0.0262       |
| 222210010                      | $d(xz) \rightarrow \pi^*(2)$                                                     | 0.0212       |
| 222120001                      | $d(z^2) \rightarrow \pi^*(3)$                                                    | 0.0188       |
| 022212100                      | $2x[d(x^2-y^2)/C(sp^2)] + d(xz) \rightarrow 2x[d(x^2-y^2)/C(sp^2)^*] + \pi^*(1)$ | 0.0143       |
| 222121000                      | $d(z^2) \rightarrow d(x^2-y^2)/C(sp^2)^*$                                        | 0.0134       |
| 221220001                      | $d(yz) \rightarrow \pi^*(3)$                                                     | 0.0117       |
| 222022000                      | $2x[d(z^2)] \rightarrow 2x[d(x^2-y^2)/C(sp^2)^*]$                                | 0.0116       |
| <b>Sum of CSS</b>              |                                                                                  | <b>59 %</b>  |
| <b>Sum of all MLCT</b>         |                                                                                  | <b>18 %</b>  |
| <b>Sum of all d-d</b>          |                                                                                  | <b>15 %</b>  |
| <b>Sum of mixed MLCT + d-d</b> |                                                                                  | <b>1 %</b>   |



**3B** with Ni–C distance of 3.50 Å (dissociation limit) – CASSCF/NEVPT2 composition of the singlet ground state with CPCM(THF) (10e,8o Active Space) – 25 triplet roots, 15 singlet roots. Active Space Orbitals (in order for CI vector notation below):  $d(xy)$ ,  $d(yz)$ ,  $d(z^2)$ ,  $d(xz)$ ,  $d(x^2-y^2)/C(sp^2)$ ,  $d(x^2-y^2)/C(sp^2)^*$ ,  $\pi^*(1)$ ,  $\pi^*(2)$ .

| CI vector                      | Transition                                                                | Contribution |
|--------------------------------|---------------------------------------------------------------------------|--------------|
| 22211110                       | $d(xz) + d(x^2-y^2)/C(sp^2) \rightarrow d(x^2-y^2)/C(sp^2)^* + \pi^*(1)$  | 0.6940       |
| 22121110                       | $d(x^2-y^2)/C(sp^2) + d(z^2) \rightarrow d(x^2-y^2)/C(sp^2)^* + \pi^*(1)$ | 0.1643       |
| 21221110                       | $d(yz) + d(x^2-y^2)/C(sp^2) \rightarrow d(x^2-y^2)/C(sp^2)^* + \pi^*(1)$  | 0.0344       |
| 22112110                       | $d(z^2) + d(xz) \rightarrow d(x^2-y^2)/C(sp^2)^* + \pi^*(1)$              | 0.0339       |
| 22221100                       | $d(x^2-y^2)/C(sp^2) \rightarrow d(x^2-y^2)/C(sp^2)^*$                     | 0.0329       |
| 11222110                       | $d(xy) + d(yz) \rightarrow d(x^2-y^2)/C(sp^2)^* + \pi^*(1)$               | 0.0174       |
| <b>Sum of CSS</b>              |                                                                           | <b>0 %</b>   |
| <b>Sum of all MLCT</b>         |                                                                           | <b>0 %</b>   |
| <b>Sum of all d-d</b>          |                                                                           | <b>3 %</b>   |
| <b>Sum of mixed MLCT + d-d</b> |                                                                           | <b>94 %</b>  |

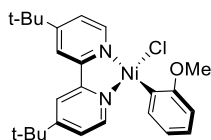

**3B** with Ni–C distance of 3.50 Å (dissociation limit) – CASSCF/QD-NEVPT2 composition of the singlet ground state with CPCM(THF) (10e,8o Active Space) – 25 triplet roots, 15 singlet roots. Active Space Orbitals (in order for CI vector notation below):  $d(xy)$ ,  $d(yz)$ ,  $d(z^2)$ ,  $d(xz)$ ,  $d(x^2-y^2)/C(sp^2)$ ,  $d(x^2-y^2)/C(sp^2)^*$ ,  $\pi^*(1)$ ,  $\pi^*(2)$ .

| CI vector                      | Transition                                                                       | Contribution |
|--------------------------------|----------------------------------------------------------------------------------|--------------|
| 22211110                       | $d(xz) + d(x^2-y^2)/C(sp^2) \rightarrow d(x^2-y^2)/C(sp^2)^* + \pi^*(1)$         | 0.6759       |
| 22212010                       | $d(xz) \rightarrow \pi^*(1)$                                                     | 0.0606       |
| 22112110                       | $d(z^2) + d(xz) \rightarrow d(x^2-y^2)/C(sp^2)^* + \pi^*(1)$                     | 0.0556       |
| 22221100                       | $d(x^2-y^2)/C(sp^2) \rightarrow d(x^2-y^2)/C(sp^2)^*$                            | 0.0488       |
| 21221110                       | $d(yz) + d(x^2-y^2)/C(sp^2) \rightarrow d(x^2-y^2)/C(sp^2)^* + \pi^*(1)$         | 0.0413       |
| 22211101                       | $d(xz) + d(x^2-y^2)/C(sp^2) \rightarrow d(x^2-y^2)/C(sp^2)^* + \pi^*(2)$         | 0.0289       |
| 22210210                       | $2x[d(x^2-y^2)/C(sp^2) + d(xz)] \rightarrow 2x[d(x^2-y^2)/C(sp^2)^*] + \pi^*(1)$ | 0.0269       |
| 11222110                       | $d(xy) + d(yz) \rightarrow d(x^2-y^2)/C(sp^2)^* + \pi^*(1)$                      | 0.0233       |
| <b>Sum of CSS</b>              |                                                                                  | <b>0 %</b>   |
| <b>Sum of all MLCT</b>         |                                                                                  | <b>6 %</b>   |
| <b>Sum of all d-d</b>          |                                                                                  | <b>5 %</b>   |
| <b>Sum of mixed MLCT + d-d</b> |                                                                                  | <b>85 %</b>  |



**3B** – CASSCF/NEVPT2 spin-orbit corrected absorption transitions for the CPCM(THF) phase spectrum (10e,9o Active Space) – 25 triplet roots, 15 singlet roots.

| <i>E</i> /nm | <i>E</i> /kcal mol <sup>-1</sup> | <i>f</i> <sub>osc</sub> | <i>E</i> /nm | <i>E</i> /kcal mol <sup>-1</sup> | <i>f</i> <sub>osc</sub> |
|--------------|----------------------------------|-------------------------|--------------|----------------------------------|-------------------------|
| 689.6        | 41.5                             | 0.0002633               | 407.4        | 70.2                             | 0.0003498               |
| 689.3        | 41.5                             | 0.0000012               | 407.2        | 70.2                             | 0.0002181               |
| 684.4        | 41.8                             | 0.0046114               | 407.1        | 70.2                             | 0.0000046               |
| 677.2        | 42.2                             | 0.0026877               | 398.6        | 71.7                             | 0.1196569               |
| 637.6        | 44.8                             | 0.0000961               | 371.0        | 77.1                             | 0.0000001               |
| 637.2        | 44.9                             | 0.0026217               | 371.0        | 77.1                             | 0.0000664               |
| 637.1        | 44.9                             | 0.0025379               | 370.6        | 77.1                             | 0.0050557               |
| 623.1        | 45.9                             | 0.0017026               | 369.5        | 77.4                             | 0.0050975               |
| 621.7        | 46.0                             | 0.0000008               | 353.0        | 81.0                             | 0.0069280               |
| 620.1        | 46.1                             | 0.0002654               | 351.5        | 81.3                             | 0.0001092               |
| 588.7        | 48.6                             | 0.0863704               | 351.5        | 81.3                             | 0.0000012               |
| 542.0        | 52.7                             | 0.0062593               | 344.7        | 83.0                             | 0.0590034               |
| 540.5        | 52.9                             | 0.0000011               | 338.8        | 84.4                             | 0.0000827               |
| 540.0        | 52.9                             | 0.0000938               | 338.3        | 84.5                             | 0.0000094               |
| 521.9        | 54.8                             | 0.2340130               | 333.8        | 85.7                             | 0.0002150               |
| 467.5        | 61.2                             | 0.0039504               | 333.1        | 85.8                             | 0.0000279               |
| 466.4        | 61.3                             | 0.0000905               | 330.7        | 86.5                             | 0.0019654               |
| 449.3        | 63.6                             | 0.0003048               | 328.5        | 87.0                             | 0.0600651               |
| 446.0        | 64.1                             | 0.0003265               | 326.1        | 87.7                             | 0.0000844               |
| 438.0        | 65.3                             | 0.0000003               | 322.4        | 88.7                             | 0.0004089               |
| 438.0        | 65.3                             | 0.0000064               | 320.3        | 89.3                             | 0.0001004               |
| 436.6        | 65.5                             | 0.0021742               | 317.7        | 90.0                             | 0.0000359               |
| 435.7        | 65.6                             | 0.0073985               | 312.6        | 91.5                             | 0.0006191               |
| 413.5        | 69.1                             | 0.0000342               | 312.1        | 91.6                             | 0.0000106               |
| 412.0        | 69.4                             | 0.0000452               | 312.1        | 91.6                             | 0.0000087               |
| 412.0        | 69.4                             | 0.0000294               | 312.0        | 91.6                             | 0.0002604               |
| 411.6        | 69.5                             | 0.0002800               |              |                                  |                         |



**3B** – CASSCF/QD-NEVPT2 spin-orbit corrected absorption transitions for the CPCM(THF) phase spectrum (10e,9o Active Space) – 25 triplet roots, 15 singlet roots.

| <i>E</i> /nm | <i>E</i> /kcal mol <sup>-1</sup> | <i>f</i> <sub>osc</sub> | <i>E</i> /nm | <i>E</i> /kcal mol <sup>-1</sup> | <i>f</i> <sub>osc</sub> |
|--------------|----------------------------------|-------------------------|--------------|----------------------------------|-------------------------|
| 684.8        | 41.8                             | 0.0000756               | 409.1        | 69.9                             | 0.0002117               |
| 684.7        | 41.8                             | 0.0000609               | 403.1        | 70.9                             | 0.0001532               |
| 681.0        | 42.0                             | 0.0060365               | 392.8        | 72.8                             | 0.1232790               |
| 674.2        | 42.4                             | 0.0009035               | 368.9        | 77.5                             | 0.0000156               |
| 672.0        | 42.5                             | 0.0001606               | 368.9        | 77.5                             | 0.0000702               |
| 669.7        | 42.7                             | 0.0011916               | 368.7        | 77.6                             | 0.0079337               |
| 668.0        | 42.8                             | 0.0000276               | 366.8        | 78.0                             | 0.0019092               |
| 618.4        | 46.2                             | 0.0013148               | 350.2        | 81.7                             | 0.0000599               |
| 617.2        | 46.3                             | 0.0000051               | 350.2        | 81.7                             | 0.0001282               |
| 615.7        | 46.4                             | 0.0004056               | 349.5        | 81.8                             | 0.0042934               |
| 587.1        | 48.7                             | 0.0923034               | 341.0        | 83.8                             | 0.0417531               |
| 537.0        | 53.2                             | 0.0117632               | 334.5        | 85.5                             | 0.0003180               |
| 535.4        | 53.4                             | 0.0000026               | 333.6        | 85.7                             | 0.0001221               |
| 534.8        | 53.5                             | 0.0001810               | 331.5        | 86.2                             | 0.0001862               |
| 521.9        | 54.8                             | 0.2241353               | 329.7        | 86.7                             | 0.0000114               |
| 471.2        | 60.7                             | 0.0000953               | 329.7        | 86.7                             | 0.0002678               |
| 467.1        | 61.2                             | 0.0038936               | 328.6        | 87.0                             | 0.0178893               |
| 449.1        | 63.7                             | 0.0004997               | 322.8        | 88.6                             | 0.0001349               |
| 444.9        | 64.3                             | 0.0004266               | 320.6        | 89.2                             | 0.0000358               |
| 435.2        | 65.7                             | 0.0000020               | 319.6        | 89.5                             | 0.0008111               |
| 435.1        | 65.7                             | 0.0000274               | 317.9        | 89.9                             | 0.0006066               |
| 433.4        | 66.0                             | 0.0016452               | 314.1        | 91.0                             | 0.0000128               |
| 432.4        | 66.1                             | 0.0008911               | 312.9        | 91.4                             | 0.0018466               |
| 432.2        | 66.2                             | 0.0000064               | 312.3        | 91.6                             | 0.0001073               |
| 432.1        | 66.2                             | 0.0000865               | 311.3        | 91.8                             | 0.0000976               |
| 431.1        | 66.3                             | 0.0058660               | 310.7        | 92.0                             | 0.0133577               |
| 409.7        | 69.8                             | 0.0001399               | 309.5        | 92.4                             | 0.0563392               |
| 409.2        | 69.9                             | 0.0003481               | 309.3        | 92.4                             | 0.0000230               |





**3B** – TD-DFT (B3LYP) absorption transitions (singlets only) for the CPCM(THF) phase spectrum.

| <i>E</i> /nm | <i>E</i> /kcal mol <sup>-1</sup> | <i>f</i> <sub>osc</sub> | <i>E</i> /nm | <i>E</i> /kcal mol <sup>-1</sup> | <i>f</i> <sub>osc</sub> |
|--------------|----------------------------------|-------------------------|--------------|----------------------------------|-------------------------|
| 615.8        | 46.4                             | 0.0000000               | 410.3        | 69.7                             | 0.0002329               |
| 522.1        | 54.8                             | 0.0044852               | 421.1        | 67.9                             | 0.0000000               |
| 508.5        | 56.2                             | 0.0003901               | 428.6        | 66.7                             | 0.0003379               |
| 594.1        | 48.1                             | 0.0000000               | 385.3        | 74.2                             | 0.0000000               |
| 541.5        | 52.8                             | 0.0005359               | 362.9        | 78.8                             | 0.0219428               |
| 545.1        | 52.5                             | 0.0000000               | 367.8        | 77.7                             | 0.0000000               |
| 469.1        | 60.9                             | 0.0000079               | 366.9        | 77.9                             | 0.0000956               |
| 462.5        | 61.8                             | 0.0002722               | 318.5        | 89.8                             | 0.0000000               |
| 595.9        | 48.0                             | 0.0000000               | 323.7        | 88.3                             | 0.0000000               |
| 548.2        | 52.2                             | 0.0002849               | 334.1        | 85.6                             | 0.0186734               |
| 478.2        | 59.8                             | 0.0268718               | 316.2        | 90.4                             | 0.0000000               |
| 456.5        | 62.6                             | 0.0000000               | 315.6        | 90.6                             | 0.0000000               |
| 427.8        | 66.8                             | 0.0628958               | 361.1        | 79.2                             | 0.0000000               |
| 378.8        | 75.5                             | 0.0000000               | 389.4        | 73.4                             | 0.0020826               |
| 439.4        | 65.1                             | 0.0000000               | 327.4        | 87.3                             | 0.0090556               |
| 434.2        | 65.9                             | 0.0002349               | 332.0        | 86.1                             | 0.0171221               |
| 370.1        | 77.3                             | 0.0000000               | 325.6        | 87.8                             | 0.0000000               |
| 459.3        | 62.2                             | 0.0000000               | 310.5        | 92.1                             | 0.0000000               |
| 457.8        | 62.5                             | 0.0007110               | 300.0        | 95.3                             | 0.0000000               |
| 412.5        | 69.3                             | 0.0000000               | 324.3        | 88.2                             | 0.0001193               |



**3B** – TD-DFT (B3LYP) absorption transitions (singlets only) for the CPCM(Toluene) phase spectrum.

| <i>E</i> /nm | <i>E</i> /kcal mol <sup>-1</sup> | <i>f</i> <sub>osc</sub> | <i>E</i> /nm | <i>E</i> /kcal mol <sup>-1</sup> | <i>f</i> <sub>osc</sub> |
|--------------|----------------------------------|-------------------------|--------------|----------------------------------|-------------------------|
| 799.2        | 35.8                             | 0.0000000               | 403.0        | 70.9                             | 0.0000796               |
| 714.4        | 40.0                             | 0.0000000               | 382.6        | 74.7                             | 0.0000000               |
| 688.0        | 41.6                             | 0.0000000               | 382.1        | 74.8                             | 0.0000000               |
| 655.6        | 43.6                             | 0.0007345               | 376.5        | 75.9                             | 0.0000000               |
| 637.6        | 44.8                             | 0.0000000               | 376.4        | 76.0                             | 0.0045989               |
| 615.9        | 46.4                             | 0.0000000               | 374.0        | 76.5                             | 0.0000000               |
| 548.5        | 52.1                             | 0.0011810               | 362.8        | 78.8                             | 0.0000000               |
| 537.7        | 53.2                             | 0.0091244               | 362.1        | 79.0                             | 0.0114354               |
| 525.5        | 54.4                             | 0.0000000               | 361.6        | 79.1                             | 0.0266339               |
| 521.2        | 54.9                             | 0.0008560               | 358.9        | 79.7                             | 0.0000143               |
| 514.2        | 55.6                             | 0.0008955               | 356.9        | 80.1                             | 0.0005318               |
| 511.0        | 56.0                             | 0.0000000               | 344.6        | 83.0                             | 0.0000000               |
| 506.8        | 56.4                             | 0.0007487               | 344.0        | 83.1                             | 0.0087796               |
| 505.8        | 56.5                             | 0.0000000               | 341.7        | 83.7                             | 0.0000000               |
| 490.1        | 58.3                             | 0.0002850               | 340.2        | 84.0                             | 0.0006497               |
| 473.2        | 60.4                             | 0.0035455               | 334.8        | 85.4                             | 0.0088549               |
| 473.0        | 60.4                             | 0.0126856               | 334.2        | 85.5                             | 0.0000000               |
| 468.6        | 61.0                             | 0.0575560               | 331.8        | 86.2                             | 0.0000000               |
| 463.1        | 61.7                             | 0.0079904               | 327.9        | 87.2                             | 0.0000000               |
| 461.5        | 62.0                             | 0.0000000               | 322.0        | 88.8                             | 0.0385638               |
| 459.0        | 62.3                             | 0.0000000               | 317.7        | 90.0                             | 0.0000000               |
| 458.7        | 62.3                             | 0.0002141               | 314.1        | 91.0                             | 0.0000000               |
| 438.3        | 65.2                             | 0.0037579               | 309.0        | 92.5                             | 0.0731414               |
| 422.2        | 67.7                             | 0.0000000               | 308.3        | 92.7                             | 0.0000000               |
| 416.9        | 68.6                             | 0.0000000               | 305.4        | 93.6                             | 0.0000000               |
| 404.9        | 70.6                             | 0.0247324               | 301.0        | 95.0                             | 0.0000000               |
| 404.5        | 70.7                             | 0.0000000               |              |                                  |                         |

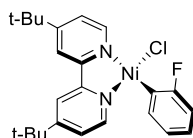

**4B** with Ni–C distance of 1.90 Å (near-equilibrium geometry) – CASSCF/NEVPT2 lowest transition energies with CPCM(THF) (10e,9o Active Space) – 25 triplet roots, 15 singlet roots. Active Space Orbitals (in order for CI vector notation below):  $d(x^2-y^2)/C(sp^2)$ ,  $d(yz)$ ,  $d(xz)$ ,  $d(xy)$ ,  $d(z^2)$ ,  $d(x^2-y^2)/C(sp^2)^*$ ,  $\pi^*(1)$ ,  $\pi^*(2)$ ,  $\pi^*(3)$ .

| State | Root | Multiplicity | $\Delta E/\text{nm}$ | $\Delta E/\text{kcal mol}^{-1}$ | CI vector | Contribution |
|-------|------|--------------|----------------------|---------------------------------|-----------|--------------|
| 0     | 0    | 1            | ---                  | ---                             | 222220000 | 0.6681       |
|       |      |              |                      |                                 | 122221000 | 0.1705       |
| 1     | 0    | 3            | 1116.3               | 25.6                            | 222211000 | 0.8372       |
|       |      |              |                      |                                 | 122212000 | 0.1524       |
| 2     | 1    | 3            | 961.9                | 29.7                            | 221221000 | 0.5481       |
|       |      |              |                      |                                 | 222121000 | 0.2298       |
| 3     | 2    | 3            | 871.1                | 32.8                            | 212221000 | 0.7256       |
|       |      |              |                      |                                 | 112222000 | 0.1259       |
| 4     | 3    | 3            | 769.5                | 37.2                            | 222210100 | 0.8667       |
| 5     | 1    | 1            | 755.5                | 37.8                            | 222210100 | 0.8678       |
| 6     | 4    | 3            | 708.3                | 40.4                            | 221220100 | 0.4861       |
|       |      |              |                      |                                 | 212220100 | 0.2263       |
| 7     | 5    | 3            | 637.8                | 44.8                            | 222121000 | 0.4359       |
|       |      |              |                      |                                 | 221221000 | 0.2210       |
| 8     | 6    | 3            | 615.0                | 46.5                            | 212220100 | 0.5650       |
|       |      |              |                      |                                 | 222120100 | 0.1793       |
| 9     | 2    | 1            | 543.6                | 52.6                            | 222211000 | 0.5503       |
|       |      |              |                      |                                 | 221220100 | 0.1870       |
| 10    | 3    | 1            | 530.1                | 53.9                            | 212220100 | 0.5131       |
|       |      |              |                      |                                 | 222121000 | 0.1264       |
| 11    | 4    | 1            | 524.9                | 54.5                            | 221220100 | 0.2776       |
|       |      |              |                      |                                 | 222211000 | 0.2340       |
| 12    | 5    | 1            | 483.6                | 59.1                            | 222121000 | 0.3170       |
|       |      |              |                      |                                 | 212220100 | 0.2065       |
|       |      |              |                      |                                 | 221221000 | 0.1468       |
| 13    | 6    | 1            | 467.7                | 61.1                            | 221221000 | 0.5198       |
|       |      |              |                      |                                 | 222121000 | 0.2854       |
| 14    | 7    | 3            | 467.4                | 61.2                            | 222210010 | 0.8651       |
| 15    | 7    | 1            | 465.6                | 61.4                            | 222210010 | 0.8646       |
| 16    | 8    | 3            | 458.2                | 62.4                            | 222120100 | 0.4778       |
|       |      |              |                      |                                 | 221220100 | 0.2440       |
| 17    | 9    | 3            | 446.5                | 64.0                            | 221220010 | 0.4939       |
|       |      |              |                      |                                 | 212220010 | 0.2037       |
|       |      |              |                      |                                 | 222120010 | 0.1396       |
| 18    | 8    | 1            | 445.7                | 64.1                            | 222120100 | 0.4689       |
|       |      |              |                      |                                 | 221220100 | 0.2374       |
| 19    | 9    | 1            | 442.5                | 64.6                            | 212221000 | 0.7404       |
| 20    | 10   | 1            | 426.4                | 67.1                            | 221220010 | 0.4860       |
|       |      |              |                      |                                 | 212220010 | 0.1751       |
|       |      |              |                      |                                 | 222120010 | 0.1430       |

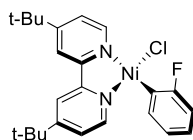

**4B** with Ni–C distance of 1.90 Å (near-equilibrium geometry) – CASSCF/QD-NEVPT2 lowest transition energies with CPCM(THF) (10e,9o Active Space) – 25 triplet roots, 15 singlet roots. Active Space Orbitals (in order for CI vector notation below):  $d(x^2-y^2)/C(sp^2)$ ,  $d(yz)$ ,  $d(xz)$ ,  $d(xy)$ ,  $d(z^2)$ ,  $d(x^2-y^2)/C(sp^2)^*$ ,  $\pi^*(1)$ ,  $\pi^*(2)$ ,  $\pi^*(3)$ .

| State | Root | Multiplicity | $\Delta E/\text{nm}$ | $\Delta E/\text{kcal mol}^{-1}$ | CI vector | Contribution |
|-------|------|--------------|----------------------|---------------------------------|-----------|--------------|
| 0     | 0    | 1            | ---                  | ---                             | 222220000 | 0.5990       |
|       |      |              |                      |                                 | 122221000 | 0.1326       |
|       |      |              |                      |                                 | 212220100 | 0.1122       |
| 1     | 0    | 3            | 1049.6               | 27.2                            | 222211000 | 0.8218       |
|       |      |              |                      |                                 | 122212000 | 0.1450       |
| 2     | 1    | 3            | 936.2                | 30.5                            | 221221000 | 0.5441       |
|       |      |              |                      |                                 | 222121000 | 0.2579       |
| 3     | 2    | 3            | 839.8                | 34.0                            | 212221000 | 0.7691       |
|       |      |              |                      |                                 | 112222000 | 0.1306       |
| 4     | 3    | 3            | 738.6                | 38.7                            | 222210100 | 0.8651       |
| 5     | 1    | 1            | 720.9                | 39.7                            | 222210100 | 0.8614       |
| 6     | 2    | 1            | 691.6                | 41.3                            | 221220100 | 0.4837       |
|       |      |              |                      |                                 | 222120100 | 0.2840       |
| 7     | 4    | 3            | 677.6                | 42.2                            | 221220100 | 0.4143       |
|       |      |              |                      |                                 | 212220100 | 0.1652       |
|       |      |              |                      |                                 | 222120100 | 0.1307       |
| 8     | 5    | 3            | 665.3                | 43.0                            | 222121000 | 0.4108       |
|       |      |              |                      |                                 | 221221000 | 0.2059       |
| 9     | 6    | 3            | 591.2                | 48.4                            | 212220100 | 0.5540       |
|       |      |              |                      |                                 | 222120100 | 0.1768       |
| 10    | 3    | 1            | 568.4                | 50.3                            | 212220100 | 0.6203       |
| 11    | 4    | 1            | 489.7                | 58.4                            | 222120100 | 0.2450       |
|       |      |              |                      |                                 | 221221000 | 0.1940       |
|       |      |              |                      |                                 | 222121000 | 0.1489       |
| 12    | 7    | 3            | 452.9                | 63.1                            | 222210010 | 0.8342       |
| 13    | 5    | 1            | 450.7                | 63.4                            | 222210010 | 0.8471       |
| 14    | 8    | 3            | 443.6                | 64.5                            | 222120100 | 0.4643       |
|       |      |              |                      |                                 | 221220100 | 0.2504       |
| 15    | 6    | 1            | 437.8                | 65.3                            | 222211000 | 0.5877       |
|       |      |              |                      |                                 | 221220010 | 0.1239       |
| 16    | 9    | 3            | 432.5                | 66.1                            | 221220010 | 0.4654       |
|       |      |              |                      |                                 | 212220010 | 0.2300       |
|       |      |              |                      |                                 | 222120010 | 0.1337       |
| 17    | 7    | 1            | 432.4                | 66.1                            | 212221000 | 0.5217       |
|       |      |              |                      |                                 | 221221000 | 0.2366       |
| 18    | 8    | 1            | 414.0                | 69.1                            | 222121000 | 0.4230       |
|       |      |              |                      |                                 | 221221000 | 0.2357       |
| 19    | 9    | 1            | 398.5                | 71.7                            | 221220010 | 0.2665       |
|       |      |              |                      |                                 | 222211000 | 0.1836       |
| 20    | 10   | 3            | 397.3                | 72.0                            | 222210001 | 0.8399       |



**4B** with Ni–C distance of 3.50 Å (dissociation limit) – CASSCF/NEVPT2 lowest transition energies with CPCM(THF) (10e,8o Active Space) – 25 triplet roots, 15 singlet roots. Active Space Orbitals (in order for CI vector notation below):  $d(xy)$ ,  $d(yz)$ ,  $d(z^2)$ ,  $d(xz)$ ,  $d(x^2-y^2)/C(sp^2)$ ,  $d(x^2-y^2)/C(sp^2)^*$ ,  $\pi^*(1)$ ,  $\pi^*(2)$ .

| State | Root | Multiplicity | $\Delta E/\text{nm}$ | $\Delta E/\text{kcal mol}^{-1}$ | CI vector | Contribution |
|-------|------|--------------|----------------------|---------------------------------|-----------|--------------|
| 0     | 0    | 1            | ---                  | ---                             | 22211110  | 0.7747       |
| 1     | 0    | 3            | 45427.0              | 0.6                             | 22211110  | 0.8100       |
| 2     | 1    | 3            | 8534.1               | 3.4                             | 22121110  | 0.9350       |
| 3     | 1    | 1            | 6562.5               | 4.4                             | 22121110  | 0.9384       |
| 4     | 2    | 3            | 5835.5               | 4.9                             | 22121110  | 0.9764       |
| 5     | 3    | 3            | 4915.1               | 5.8                             | 22211110  | 0.8444       |
| 6     | 4    | 3            | 3587.1               | 8.0                             | 21221110  | 0.8786       |
| 7     | 2    | 1            | 3428.9               | 8.3                             | 21221110  | 0.8374       |
| 8     | 5    | 3            | 3204.4               | 8.9                             | 21221110  | 0.8774       |
| 9     | 3    | 1            | 1356.0               | 21.1                            | 21212110  | 0.4732       |
|       |      |              |                      |                                 | 12221110  | 0.4583       |
| 10    | 6    | 3            | 1339.8               | 21.3                            | 21212110  | 0.4773       |
|       |      |              |                      |                                 | 12221110  | 0.4716       |
| 11    | 4    | 1            | 1237.7               | 23.1                            | 22211101  | 0.7763       |
| 12    | 7    | 3            | 1231.9               | 23.2                            | 12221110  | 0.4933       |
|       |      |              |                      |                                 | 21212110  | 0.4487       |
| 13    | 5    | 1            | 1228.9               | 23.3                            | 22220110  | 0.8295       |
| 14    | 8    | 3            | 1226.5               | 23.3                            | 22220110  | 0.8381       |
| 15    | 9    | 3            | 1218.3               | 23.5                            | 22211101  | 0.8106       |
| 16    | 10   | 3            | 1186.1               | 24.1                            | 22121101  | 0.9313       |
| 17    | 6    | 1            | 1174.7               | 24.3                            | 22121101  | 0.9035       |
| 18    | 11   | 3            | 1154.9               | 24.8                            | 22121101  | 0.9439       |
| 19    | 12   | 3            | 1100.3               | 26.0                            | 22211101  | 0.8329       |
| 20    | 13   | 3            | 991.7                | 28.8                            | 21221101  | 0.8682       |



**4B** with Ni–C distance of 3.50 Å (dissociation limit) – CASSCF/QD-NEVPT2 lowest transition energies with CPCM(THF) (10e,8o Active Space) – 25 triplet roots, 15 singlet roots. Active Space Orbitals (in order for CI vector notation below): d(xy), d(yz), d(z<sup>2</sup>), d(xz), d(x<sup>2</sup>-y<sup>2</sup>)/C(sp<sup>2</sup>), d(x<sup>2</sup>-y<sup>2</sup>)/C(sp<sup>2</sup>)\*, π\*(1), π\*(2).

| State | Root | Multiplicity | ΔE/nm   | ΔE/kcal mol <sup>-1</sup> | CI vector | Contribution |
|-------|------|--------------|---------|---------------------------|-----------|--------------|
| 0     | 0    | 1            | ---     | ---                       | 22211110  | 0.73235      |
| 1     | 0    | 3            | 41152.3 | 0.7                       | 22211110  | 0.77291      |
| 2     | 1    | 3            | 7275.9  | 3.9                       | 22121110  | 0.93354      |
| 3     | 1    | 1            | 5794.1  | 4.9                       | 22121110  | 0.93771      |
| 4     | 2    | 3            | 5218.9  | 5.5                       | 22121110  | 0.97586      |
| 5     | 3    | 3            | 4476.3  | 6.4                       | 22211110  | 0.83912      |
| 6     | 4    | 3            | 3344.9  | 8.5                       | 21221110  | 0.87400      |
| 7     | 2    | 1            | 3213.2  | 8.9                       | 21221110  | 0.82626      |
| 8     | 5    | 3            | 3013.8  | 9.5                       | 21221110  | 0.86940      |
| 9     | 3    | 1            | 1322.9  | 21.6                      | 21212110  | 0.47358      |
|       |      |              |         |                           | 12221110  | 0.44733      |
| 10    | 6    | 3            | 1306.9  | 21.9                      | 21212110  | 0.48204      |
|       |      |              |         |                           | 12221110  | 0.46299      |
| 11    | 7    | 3            | 1208.0  | 23.7                      | 12221110  | 0.32174      |
|       |      |              |         |                           | 21212110  | 0.29576      |
|       |      |              |         |                           | 22220110  | 0.28837      |
| 12    | 4    | 1            | 1205.8  | 23.7                      | 22220110  | 0.52330      |
|       |      |              |         |                           | 22211101  | 0.28057      |
| 13    | 8    | 3            | 1193.3  | 24.0                      | 22220110  | 0.54411      |
|       |      |              |         |                           | 12221110  | 0.17092      |
|       |      |              |         |                           | 21212110  | 0.15958      |
| 14    | 5    | 1            | 1190.5  | 24.0                      | 22211101  | 0.46334      |
|       |      |              |         |                           | 22220110  | 0.29535      |
| 15    | 9    | 3            | 1178.8  | 24.3                      | 22211101  | 0.77145      |
| 16    | 10   | 3            | 1158.0  | 24.7                      | 22121101  | 0.91283      |
| 17    | 6    | 1            | 1140.1  | 25.1                      | 22121101  | 0.89932      |
| 18    | 11   | 3            | 1122.5  | 25.5                      | 22121101  | 0.95424      |
| 19    | 12   | 3            | 1076.2  | 26.6                      | 22211101  | 0.83819      |
| 20    | 7    | 1            | 975.1   | 29.3                      | 21221101  | 0.67726      |
|       |      |              |         |                           | 12212110  | 0.16841      |



**4B** with Ni–C distance of 1.90 Å (near-equilibrium geometry) – CASSCF/NEVPT2 composition of the singlet ground state with CPCM(THF) (10e,9o Active Space) – 25 triplet roots, 15 singlet roots. Active Space Orbitals (in order for CI vector notation below):  $d(x^2-y^2)/C(sp^2)$ ,  $d(yz)$ ,  $d(xz)$ ,  $d(xy)$ ,  $d(z^2)$ ,  $d(x^2-y^2)/C(sp^2)^*$ ,  $\pi^*(1)$ ,  $\pi^*(2)$ ,  $\pi^*(3)$ .

| CI vector                      | Transition                                            | Contribution |
|--------------------------------|-------------------------------------------------------|--------------|
| 222220000                      | Closed-shell singlet (CSS) $d^8$                      | 0.6681       |
| 122221000                      | $d(x^2-y^2)/C(sp^2) \rightarrow d(x^2-y^2)/C(sp^2)^*$ | 0.1705       |
| 212220100                      | $d(yz) \rightarrow \pi^*(1)$                          | 0.0498       |
| 222202000                      | $2x[d(z^2)] \rightarrow 2x[d(x^2-y^2)/C(sp^2)^*]$     | 0.0201       |
| 221220100                      | $d(xz) \rightarrow \pi^*(1)$                          | 0.0197       |
| 202222000                      | $2x[d(yz)] \rightarrow 2x[d(x^2-y^2)/C(sp^2)^*]$      | 0.0105       |
| <b>Sum of CSS</b>              |                                                       | <b>67 %</b>  |
| <b>Sum of all MLCT</b>         |                                                       | <b>7 %</b>   |
| <b>Sum of all d-d</b>          |                                                       | <b>20 %</b>  |
| <b>Sum of mixed MLCT + d-d</b> |                                                       | <b>0 %</b>   |

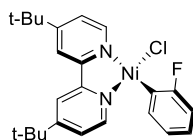

**4B** with Ni–C distance of 1.90 Å (near-equilibrium geometry) – CASSCF/QD-NEVPT2 composition of the singlet ground state with CPCM(THF) (10e,9o Active Space) – 25 triplet roots, 15 singlet roots. Active Space Orbitals (in order for CI vector notation below):  $d(x^2-y^2)/C(sp^2)$ ,  $d(yz)$ ,  $d(xz)$ ,  $d(xy)$ ,  $d(z^2)$ ,  $d(x^2-y^2)/C(sp^2)^*$ ,  $\pi^*(1)$ ,  $\pi^*(2)$ ,  $\pi^*(3)$ .

| CI vector                      | Transition                                                                       | Contribution |
|--------------------------------|----------------------------------------------------------------------------------|--------------|
| 222220000                      | Closed-shell singlet (CSS) $d^8$                                                 | 0.5990       |
| 122221000                      | $d(x^2-y^2)/C(sp^2) \rightarrow d(x^2-y^2)/C(sp^2)^*$                            | 0.1326       |
| 212220100                      | $d(yz) \rightarrow \pi^*(1)$                                                     | 0.1122       |
| 221220100                      | $d(xz) \rightarrow \pi^*(1)$                                                     | 0.0425       |
| 012222100                      | $2x[d(x^2-y^2)/C(sp^2)] + d(yz) \rightarrow 2x[d(x^2-y^2)/C(sp^2)^*] + \pi^*(1)$ | 0.0122       |
| 222202000                      | $2x[d(z^2)] \rightarrow 2x[d(x^2-y^2)/C(sp^2)^*]$                                | 0.0119       |
| 221220010                      | $d(xz) \rightarrow \pi^*(2)$                                                     | 0.0115       |
| 212220010                      | $d(yz) \rightarrow \pi^*(2)$                                                     | 0.0106       |
| <b>Sum of CSS</b>              |                                                                                  | <b>60 %</b>  |
| <b>Sum of all MLCT</b>         |                                                                                  | <b>18 %</b>  |
| <b>Sum of all d-d</b>          |                                                                                  | <b>14 %</b>  |
| <b>Sum of mixed MLCT + d-d</b> |                                                                                  | <b>1 %</b>   |



**4B** with Ni–C distance of 3.50 Å (dissociation limit) – CASSCF/NEVPT2 composition of the singlet ground state with CPCM(THF) (10e,8o Active Space) – 25 triplet roots, 15 singlet roots. Active Space Orbitals (in order for CI vector notation below): d(xy), d(yz), d(z<sup>2</sup>), d(xz), d(x<sup>2</sup>-y<sup>2</sup>)/C(sp<sup>2</sup>), d(x<sup>2</sup>-y<sup>2</sup>)/C(sp<sup>2</sup>)\*, π\*(1), π\*(2).

| CI vector                      | Transition                                                                                                                               | Contribution |
|--------------------------------|------------------------------------------------------------------------------------------------------------------------------------------|--------------|
| 22211110                       | d(xz) + d(x <sup>2</sup> -y <sup>2</sup> )/C(sp <sup>2</sup> ) → d(x <sup>2</sup> -y <sup>2</sup> )/C(sp <sup>2</sup> )* + π*(1)         | 0.7747       |
| 22112110                       | d(z <sup>2</sup> ) + d(xz) → d(x <sup>2</sup> -y <sup>2</sup> )/C(sp <sup>2</sup> )* + π*(1)                                             | 0.0553       |
| 22221100                       | d(x <sup>2</sup> -y <sup>2</sup> )/C(sp <sup>2</sup> ) → d(x <sup>2</sup> -y <sup>2</sup> )/C(sp <sup>2</sup> )*                         | 0.0414       |
| 21221110                       | d(yz) + d(x <sup>2</sup> -y <sup>2</sup> )/C(sp <sup>2</sup> ) → d(x <sup>2</sup> -y <sup>2</sup> )/C(sp <sup>2</sup> )* + π*(1)         | 0.0342       |
| 11222110                       | d(xy) + d(yz) → d(x <sup>2</sup> -y <sup>2</sup> )/C(sp <sup>2</sup> )* + π*(1)                                                          | 0.0308       |
| 22212010                       | d(xz) → π*(1)                                                                                                                            | 0.0264       |
| 22210210                       | 2x[d(x <sup>2</sup> -y <sup>2</sup> )/C(sp <sup>2</sup> )] + d(xz) → 2x[d(x <sup>2</sup> -y <sup>2</sup> )/C(sp <sup>2</sup> )*] + π*(1) | 0.0125       |
| <b>Sum of CSS</b>              |                                                                                                                                          | <b>0 %</b>   |
| <b>Sum of all MLCT</b>         |                                                                                                                                          | <b>3 %</b>   |
| <b>Sum of all d-d</b>          |                                                                                                                                          | <b>4 %</b>   |
| <b>Sum of mixed MLCT + d-d</b> |                                                                                                                                          | <b>91 %</b>  |

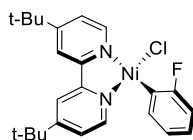

**4B** with Ni–C distance of 3.50 Å (dissociation limit) – CASSCF/QD-NEVPT2 composition of the singlet ground state with CPCM(THF) (10e,8o Active Space) – 25 triplet roots, 15 singlet roots. Active Space Orbitals (in order for CI vector notation below): d(xy), d(yz), d(z<sup>2</sup>), d(xz), d(x<sup>2</sup>-y<sup>2</sup>)/C(sp<sup>2</sup>), d(x<sup>2</sup>-y<sup>2</sup>)/C(sp<sup>2</sup>)\*, π\*(1), π\*(2).

| CI vector                      | Transition                                                                                                                               | Contribution |
|--------------------------------|------------------------------------------------------------------------------------------------------------------------------------------|--------------|
| 22211110                       | d(xz) + d(x <sup>2</sup> -y <sup>2</sup> )/C(sp <sup>2</sup> ) → d(x <sup>2</sup> -y <sup>2</sup> )/C(sp <sup>2</sup> )* + π*(1)         | 0.73235      |
| 22112110                       | d(z <sup>2</sup> ) + d(xz) → d(x <sup>2</sup> -y <sup>2</sup> )/C(sp <sup>2</sup> )* + π*(1)                                             | 0.05285      |
| 22221100                       | d(x <sup>2</sup> -y <sup>2</sup> )/C(sp <sup>2</sup> ) → d(x <sup>2</sup> -y <sup>2</sup> )/C(sp <sup>2</sup> )*                         | 0.05101      |
| 21221110                       | d(yz) + d(x <sup>2</sup> -y <sup>2</sup> )/C(sp <sup>2</sup> ) → d(x <sup>2</sup> -y <sup>2</sup> )/C(sp <sup>2</sup> )* + π*(1)         | 0.03885      |
| 22211101                       | d(xz) + d(x <sup>2</sup> -y <sup>2</sup> )/C(sp <sup>2</sup> ) → d(x <sup>2</sup> -y <sup>2</sup> )/C(sp <sup>2</sup> )* + π*(2)         | 0.03020      |
| 22212010                       | d(xz) → π*(1)                                                                                                                            | 0.02676      |
| 11222110                       | d(xy) + d(yz) → d(x <sup>2</sup> -y <sup>2</sup> )/C(sp <sup>2</sup> )* + π*(1)                                                          | 0.02594      |
| 22210210                       | 2x[d(x <sup>2</sup> -y <sup>2</sup> )/C(sp <sup>2</sup> )] + d(xz) → 2x[d(x <sup>2</sup> -y <sup>2</sup> )/C(sp <sup>2</sup> )*] + π*(1) | 0.01264      |
| <b>Sum of CSS</b>              |                                                                                                                                          | <b>0 %</b>   |
| <b>Sum of all MLCT</b>         |                                                                                                                                          | <b>3 %</b>   |
| <b>Sum of all d-d</b>          |                                                                                                                                          | <b>5 %</b>   |
| <b>Sum of mixed MLCT + d-d</b> |                                                                                                                                          | <b>89 %</b>  |





**4B** – CASSCF/NEVPT2 spin-orbit corrected absorption transitions for the CPCM(THF) phase spectrum (10e,9o Active Space) – 25 triplet roots, 15 singlet roots.

| <i>E</i> /nm | <i>E</i> /kcal mol <sup>-1</sup> | <i>f</i> <sub>osc</sub> | <i>E</i> /nm | <i>E</i> /kcal mol <sup>-1</sup> | <i>f</i> <sub>osc</sub> |
|--------------|----------------------------------|-------------------------|--------------|----------------------------------|-------------------------|
| 781.8        | 36.6                             | 0.0000000               | 441.9        | 64.7                             | 0.0002555               |
| 780.7        | 36.6                             | 0.0000793               | 425.7        | 67.2                             | 0.0657171               |
| 772.3        | 37.0                             | 0.0006429               | 401.1        | 71.3                             | 0.0016833               |
| 770.2        | 37.1                             | 0.0007335               | 398.7        | 71.7                             | 0.0000159               |
| 700.7        | 40.8                             | 0.0000006               | 398.5        | 71.7                             | 0.0000012               |
| 699.5        | 40.9                             | 0.0001296               | 397.9        | 71.9                             | 0.0055517               |
| 696.6        | 41.0                             | 0.0004054               | 396.3        | 72.2                             | 0.0011486               |
| 634.3        | 45.1                             | 0.0000001               | 382.5        | 74.7                             | 0.0000013               |
| 633.9        | 45.1                             | 0.0000001               | 381.9        | 74.9                             | 0.0000086               |
| 633.5        | 45.1                             | 0.0009612               | 379.5        | 75.3                             | 0.0001564               |
| 612.2        | 46.7                             | 0.0029874               | 360.7        | 79.3                             | 0.0000137               |
| 605.8        | 47.2                             | 0.0000003               | 360.6        | 79.3                             | 0.0000000               |
| 605.6        | 47.2                             | 0.0000459               | 355.3        | 80.5                             | 0.0000998               |
| 540.4        | 52.9                             | 0.0262353               | 348.6        | 82.0                             | 0.0000001               |
| 527.1        | 54.2                             | 0.0615065               | 346.8        | 82.4                             | 0.0000001               |
| 521.6        | 54.8                             | 0.0360768               | 345.9        | 82.7                             | 0.0000442               |
| 481.9        | 59.3                             | 0.0780234               | 345.4        | 82.8                             | 0.0000044               |
| 472.2        | 60.5                             | 0.0000001               | 344.7        | 82.9                             | 0.0000280               |
| 472.2        | 60.6                             | 0.0000259               | 343.2        | 83.3                             | 0.0000001               |
| 470.7        | 60.7                             | 0.0002642               | 337.7        | 84.7                             | 0.0000692               |
| 470.0        | 60.8                             | 0.0059274               | 336.6        | 84.9                             | 0.0000054               |
| 466.8        | 61.3                             | 0.0002590               | 333.1        | 85.8                             | 0.0000030               |
| 455.9        | 62.7                             | 0.0000003               | 331.0        | 86.4                             | 0.0000003               |
| 455.5        | 62.8                             | 0.0003353               | 330.8        | 86.4                             | 0.0000002               |
| 455.1        | 62.8                             | 0.0055889               | 330.8        | 86.4                             | 0.0000021               |
| 443.9        | 64.4                             | 0.0000450               | 330.8        | 86.4                             | 0.0001542               |
| 442.7        | 64.6                             | 0.0000133               | 328.6        | 87.0                             | 0.0000003               |
| 442.6        | 64.6                             | 0.0000485               | 325.8        | 87.8                             | 0.0000044               |
| 442.5        | 64.6                             | 0.0000521               |              |                                  |                         |



**4B** – CASSCF/QD-NEVPT2 spin-orbit corrected absorption transitions for the CPCM(THF) phase spectrum (10e,9o Active Space) – 25 triplet roots, 15 singlet roots.

| <i>E</i> /nm | <i>E</i> /kcal mol <sup>-1</sup> | <i>f</i> <sub>osc</sub> | <i>E</i> /nm | <i>E</i> /kcal mol <sup>-1</sup> | <i>f</i> <sub>osc</sub> |
|--------------|----------------------------------|-------------------------|--------------|----------------------------------|-------------------------|
| 752.5        | 38.0                             | 0.0023096               | 399.5        | 71.6                             | 0.0001764               |
| 749.2        | 38.2                             | 0.0000005               | 398.9        | 71.7                             | 0.0001139               |
| 745.6        | 38.3                             | 0.0008461               | 397.1        | 72.0                             | 0.0002370               |
| 734.0        | 39.0                             | 0.0009831               | 395.5        | 72.3                             | 0.0777954               |
| 691.6        | 41.3                             | 0.0151809               | 389.0        | 73.5                             | 0.0007604               |
| 671.3        | 42.6                             | 0.0000190               | 388.5        | 73.6                             | 0.0008365               |
| 670.4        | 42.6                             | 0.0001256               | 388.4        | 73.6                             | 0.0000254               |
| 661.5        | 43.2                             | 0.0000193               | 386.6        | 74.0                             | 0.0006103               |
| 660.9        | 43.3                             | 0.0011625               | 382.7        | 74.7                             | 0.0012577               |
| 660.5        | 43.3                             | 0.0000658               | 369.4        | 77.4                             | 0.0000116               |
| 658.8        | 43.4                             | 0.0047940               | 368.8        | 77.5                             | 0.0005857               |
| 586.6        | 48.7                             | 0.0006598               | 367.5        | 77.8                             | 0.0000781               |
| 583.0        | 49.0                             | 0.0000091               | 346.0        | 82.6                             | 0.0000053               |
| 582.5        | 49.1                             | 0.0000703               | 344.7        | 82.9                             | 0.0000048               |
| 561.6        | 50.9                             | 0.0002441               | 344.4        | 83.0                             | 0.0003245               |
| 487.2        | 58.7                             | 0.0003048               | 340.0        | 84.1                             | 0.0004053               |
| 457.3        | 62.5                             | 0.0000356               | 339.1        | 84.3                             | 0.0000187               |
| 457.3        | 62.5                             | 0.0007316               | 336.3        | 85.0                             | 0.0000319               |
| 455.5        | 62.8                             | 0.0329965               | 330.2        | 86.6                             | 0.0000122               |
| 455.3        | 62.8                             | 0.0041465               | 328.5        | 87.0                             | 0.0000641               |
| 441.7        | 64.7                             | 0.0013810               | 324.0        | 88.3                             | 0.0001573               |
| 441.6        | 64.7                             | 0.0000308               | 323.2        | 88.4                             | 0.0000046               |
| 441.5        | 64.8                             | 0.0000041               | 322.6        | 88.6                             | 0.0000073               |
| 435.8        | 65.6                             | 0.0846472               | 322.2        | 88.7                             | 0.0000710               |
| 431.6        | 66.2                             | 0.0714012               | 322.0        | 88.8                             | 0.0000057               |
| 429.0        | 66.6                             | 0.0032299               | 319.9        | 89.4                             | 0.0004750               |
| 428.9        | 66.7                             | 0.0077691               | 317.1        | 90.2                             | 0.0007867               |
| 428.8        | 66.7                             | 0.0015794               | 312.7        | 91.4                             | 0.0002954               |
| 412.3        | 69.3                             | 0.0001265               | 312.4        | 91.5                             | 0.0000005               |
| 400.2        | 71.5                             | 0.0011359               | 311.2        | 91.9                             | 0.0000011               |



**4B** – TD-DFT (B3LYP) absorption transitions (singlets only) for the CPCM(THF) phase spectrum.

| <i>E</i> /nm | <i>E</i> /kcal mol <sup>-1</sup> | <i>f</i> <sub>osc</sub> | <i>E</i> /nm | <i>E</i> /kcal mol <sup>-1</sup> | <i>f</i> <sub>osc</sub> |
|--------------|----------------------------------|-------------------------|--------------|----------------------------------|-------------------------|
| 617.7        | 46.3                             | 0.0000000               | 365.1        | 78.3                             | 0.0009386               |
| 556.9        | 51.3                             | 0.0000000               | 355.2        | 80.5                             | 0.0000000               |
| 521.7        | 54.8                             | 0.0034084               | 353.0        | 81.0                             | 0.0000000               |
| 517.5        | 55.2                             | 0.0000000               | 352.5        | 81.1                             | 0.0000308               |
| 507.5        | 56.3                             | 0.0001425               | 351.4        | 81.4                             | 0.0206623               |
| 499.6        | 57.2                             | 0.0004345               | 343.2        | 83.3                             | 0.0000000               |
| 482.3        | 59.3                             | 0.0009345               | 334.9        | 85.4                             | 0.0026885               |
| 480.8        | 59.5                             | 0.0000000               | 333.1        | 85.8                             | 0.0135067               |
| 471.0        | 60.7                             | 0.0003180               | 323.8        | 88.3                             | 0.0010484               |
| 465.6        | 61.4                             | 0.0001467               | 316.4        | 90.4                             | 0.0364402               |
| 465.6        | 61.4                             | 0.0281084               | 315.3        | 90.7                             | 0.0322596               |
| 439.7        | 65.0                             | 0.0009878               | 313.8        | 91.1                             | 0.0000000               |
| 439.1        | 65.1                             | 0.0000000               | 313.6        | 91.2                             | 0.0000000               |
| 433.4        | 66.0                             | 0.0000000               | 311.5        | 91.8                             | 0.0000000               |
| 431.6        | 66.3                             | 0.0000000               | 310.2        | 92.2                             | 0.0000000               |
| 426.4        | 67.1                             | 0.0002184               | 309.2        | 92.5                             | 0.0000000               |
| 411.8        | 69.4                             | 0.0608424               | 305.8        | 93.5                             | 0.0000000               |
| 394.9        | 72.4                             | 0.0000000               | 302.9        | 94.4                             | 0.0235678               |
| 393.0        | 72.8                             | 0.0002359               | 302.5        | 94.5                             | 0.0000000               |
| 378.0        | 75.6                             | 0.0000000               | 301.3        | 94.9                             | 0.0182939               |
| 373.1        | 76.6                             | 0.0000000               |              |                                  |                         |



**4B** – TD-DFT (B3LYP) absorption transitions (singlets only) for the CPCM(Toluene) phase spectrum.

| <i>E</i> /nm | <i>E</i> /kcal mol <sup>-1</sup> | <i>f</i> <sub>osc</sub> | <i>E</i> /nm | <i>E</i> /kcal mol <sup>-1</sup> | <i>f</i> <sub>osc</sub> |
|--------------|----------------------------------|-------------------------|--------------|----------------------------------|-------------------------|
| 640.2        | 44.7                             | 0.0000000               | 375.0        | 76.2                             | 0.0000566               |
| 618.0        | 46.3                             | 0.0000000               | 368.1        | 77.7                             | 0.0017947               |
| 603.4        | 47.4                             | 0.0000000               | 364.3        | 78.5                             | 0.0000000               |
| 564.1        | 50.7                             | 0.0000000               | 363.3        | 78.7                             | 0.0000000               |
| 562.4        | 50.8                             | 0.0004359               | 362.9        | 78.8                             | 0.0000000               |
| 551.6        | 51.8                             | 0.0010006               | 355.6        | 80.4                             | 0.0081281               |
| 528.4        | 54.1                             | 0.0069019               | 353.4        | 80.9                             | 0.0202531               |
| 514.5        | 55.6                             | 0.0001273               | 353.1        | 81.0                             | 0.0242333               |
| 513.1        | 55.7                             | 0.0000000               | 351.8        | 81.3                             | 0.0007075               |
| 511.0        | 56.0                             | 0.0004670               | 347.9        | 82.2                             | 0.0000000               |
| 498.9        | 57.3                             | 0.0255201               | 342.6        | 83.5                             | 0.0000000               |
| 495.7        | 57.7                             | 0.0000000               | 337.5        | 84.7                             | 0.0000000               |
| 485.5        | 58.9                             | 0.0000000               | 332.2        | 86.1                             | 0.0000000               |
| 483.7        | 59.1                             | 0.0086188               | 329.6        | 86.7                             | 0.0000000               |
| 467.9        | 61.1                             | 0.0006026               | 329.4        | 86.8                             | 0.0016969               |
| 464.0        | 61.6                             | 0.0002605               | 323.7        | 88.3                             | 0.0234331               |
| 454.1        | 63.0                             | 0.0473800               | 321.6        | 88.9                             | 0.0000000               |
| 438.3        | 65.2                             | 0.0002123               | 319.8        | 89.4                             | 0.0092522               |
| 437.9        | 65.3                             | 0.0000000               | 312.9        | 91.4                             | 0.0000000               |
| 415.5        | 68.8                             | 0.0000000               | 312.9        | 91.4                             | 0.0271423               |
| 413.8        | 69.1                             | 0.0006227               | 312.4        | 91.5                             | 0.0000000               |
| 411.3        | 69.5                             | 0.0000000               | 308.9        | 92.5                             | 0.0000000               |
| 393.7        | 72.6                             | 0.0238081               | 308.3        | 92.7                             | 0.0000000               |
| 386.7        | 73.9                             | 0.0000000               | 304.1        | 94.0                             | 0.0000000               |
| 386.0        | 74.1                             | 0.0000345               | 300.5        | 95.2                             | 0.0020476               |
| 380.9        | 75.1                             | 0.0000000               |              |                                  |                         |

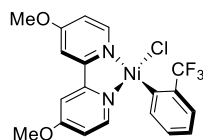

**5A** with Ni–C distance of 1.90 Å (near-equilibrium geometry) – CASSCF/NEVPT2 lowest transition energies with CPCM(THF) (10e,9o Active Space) – 25 triplet roots, 15 singlet roots. Active Space Orbitals (in order for CI vector notation below):  $d(x^2-y^2)/C(sp^2)$ ,  $d(yz)$ ,  $d(z^2)$ ,  $d(xz)$ ,  $d(xy)$ ,  $d(x^2-y^2)/C(sp^2)^*$ ,  $\pi^*(1)$ ,  $\pi^*(2)$ ,  $\pi^*(3)$ .

| State | Root | Multiplicity | $\Delta E/\text{nm}$ | $\Delta E/\text{kcal mol}^{-1}$ | CI vector | Contribution |
|-------|------|--------------|----------------------|---------------------------------|-----------|--------------|
| 0     | 0    | 1            | ---                  | ---                             | 222220000 | 0.6682       |
|       |      |              |                      |                                 | 122221000 | 0.2011       |
| 1     | 0    | 3            | 1228.2               | 23.3                            | 221221000 | 0.7954       |
|       |      |              |                      |                                 | 121222000 | 0.1612       |
| 2     | 1    | 3            | 1055.9               | 27.1                            | 222121000 | 0.7883       |
|       |      |              |                      |                                 | 122122000 | 0.1607       |
| 3     | 2    | 3            | 957.0                | 29.9                            | 212221000 | 0.7769       |
|       |      |              |                      |                                 | 112222000 | 0.1404       |
| 4     | 3    | 3            | 716.8                | 39.9                            | 221220100 | 0.8315       |
|       |      |              |                      |                                 | 222120100 | 0.6694       |
| 5     | 4    | 3            | 666.4                | 42.9                            | 212220100 | 0.1659       |
|       |      |              |                      |                                 | 222211000 | 0.6519       |
| 6     | 5    | 3            | 662.2                | 43.2                            | 212122000 | 0.2006       |
|       |      |              |                      |                                 | 122212000 | 0.1128       |
| 7     | 1    | 1            | 642.4                | 44.5                            | 221220100 | 0.6701       |
| 8     | 6    | 3            | 579.5                | 49.3                            | 212220100 | 0.6601       |
|       |      |              |                      |                                 | 222120100 | 0.1636       |
| 9     | 2    | 1            | 560.5                | 51.0                            | 222120100 | 0.5853       |
|       |      |              |                      |                                 | 222211000 | 0.1177       |
| 10    | 3    | 1            | 549.6                | 52.0                            | 212220100 | 0.7173       |
| 11    | 4    | 1            | 527.1                | 54.2                            | 221221000 | 0.6045       |
|       |      |              |                      |                                 | 221220100 | 0.1073       |
| 12    | 5    | 1            | 481.0                | 59.4                            | 222121000 | 0.7524       |
|       |      |              |                      |                                 | 122122000 | 0.1080       |
| 13    | 6    | 1            | 470.8                | 60.7                            | 222211000 | 0.7042       |
| 14    | 7    | 1            | 465.1                | 61.5                            | 212221000 | 0.7369       |
|       |      |              |                      |                                 | 112222000 | 0.1042       |
| 15    | 7    | 3            | 463.9                | 61.6                            | 221220010 | 0.8274       |
| 16    | 8    | 1            | 460.7                | 62.1                            | 221220010 | 0.8242       |
| 17    | 8    | 3            | 445.8                | 64.1                            | 222120010 | 0.6866       |
|       |      |              |                      |                                 | 212220010 | 0.1424       |
| 18    | 9    | 3            | 437.9                | 65.3                            | 222210100 | 0.7303       |
|       |      |              |                      |                                 | 212121100 | 0.1030       |
| 19    | 9    | 1            | 430.6                | 66.4                            | 222210100 | 0.7204       |
| 20    | 10   | 1            | 419.0                | 68.2                            | 222120010 | 0.6617       |
|       |      |              |                      |                                 | 212220010 | 0.1178       |



**5A** with Ni–C distance of 1.90 Å (near-equilibrium geometry) – CASSCF/QD-NEVPT2 lowest transition energies with CPCM(THF) (10e,9o Active Space) – 25 triplet roots, 15 singlet roots. Active Space Orbitals (in order for CI vector notation below):  $d(x^2-y^2)/C(sp^2)$ ,  $d(yz)$ ,  $d(z^2)$ ,  $d(xz)$ ,  $d(xy)$ ,  $d(x^2-y^2)/C(sp^2)^*$ ,  $\pi^*(1)$ ,  $\pi^*(2)$ ,  $\pi^*(3)$ .

| State | Root | Multiplicity | $\Delta E/\text{nm}$ | $\Delta E/\text{kcal mol}^{-1}$ | CI vector | Contribution |
|-------|------|--------------|----------------------|---------------------------------|-----------|--------------|
| 0     | 0    | 1            | ---                  | ---                             | 222220000 | 0.6088       |
|       |      |              |                      |                                 | 122221000 | 0.1616       |
| 1     | 0    | 3            | 1137.7               | 25.1                            | 221221000 | 0.7961       |
|       |      |              |                      |                                 | 121222000 | 0.1564       |
| 2     | 1    | 3            | 1017.4               | 28.1                            | 222121000 | 0.7788       |
|       |      |              |                      |                                 | 122122000 | 0.1445       |
| 3     | 2    | 3            | 912.2                | 31.3                            | 212221000 | 0.7822       |
|       |      |              |                      |                                 | 112222000 | 0.1419       |
| 4     | 1    | 1            | 737.5                | 38.8                            | 221220100 | 0.7863       |
| 5     | 3    | 3            | 690.6                | 41.4                            | 222211000 | 0.7536       |
|       |      |              |                      |                                 | 122212000 | 0.1133       |
| 6     | 4    | 3            | 682.4                | 41.9                            | 221220100 | 0.8148       |
| 7     | 2    | 1            | 644.0                | 44.4                            | 222120100 | 0.7066       |
| 8     | 5    | 3            | 634.9                | 45.0                            | 222120100 | 0.6819       |
|       |      |              |                      |                                 | 212220100 | 0.1452       |
| 9     | 6    | 3            | 557.4                | 51.3                            | 212220100 | 0.6744       |
|       |      |              |                      |                                 | 222120100 | 0.1415       |
| 10    | 3    | 1            | 540.1                | 52.9                            | 212220100 | 0.6746       |
| 11    | 4    | 1            | 480.8                | 59.5                            | 222121000 | 0.4849       |
|       |      |              |                      |                                 | 222210100 | 0.2378       |
| 12    | 5    | 1            | 452.1                | 63.2                            | 221221000 | 0.4354       |
|       |      |              |                      |                                 | 221220010 | 0.2746       |
| 13    | 7    | 3            | 445.7                | 64.2                            | 221220010 | 0.8223       |
| 14    | 6    | 1            | 439.8                | 65.0                            | 212221000 | 0.3448       |
|       |      |              |                      |                                 | 221220010 | 0.3238       |
| 15    | 7    | 1            | 436.2                | 65.5                            | 212221000 | 0.2095       |
|       |      |              |                      |                                 | 221220010 | 0.2061       |
|       |      |              |                      |                                 | 221221000 | 0.1913       |
| 16    | 8    | 3            | 428.7                | 66.7                            | 222120010 | 0.6617       |
|       |      |              |                      |                                 | 212220010 | 0.1629       |
| 17    | 9    | 3            | 425.2                | 67.2                            | 222210100 | 0.7198       |
|       |      |              |                      |                                 | 212121100 | 0.1002       |
| 18    | 8    | 1            | 423.1                | 67.6                            | 222211000 | 0.6536       |
|       |      |              |                      |                                 | 222120010 | 0.1232       |
| 19    | 9    | 1            | 399.5                | 71.6                            | 222210100 | 0.3810       |
|       |      |              |                      |                                 | 212221000 | 0.1395       |
|       |      |              |                      |                                 | 222121000 | 0.1024       |
| 20    | 10   | 1            | 391.0                | 73.1                            | 222120010 | 0.4466       |
|       |      |              |                      |                                 | 222211000 | 0.1092       |

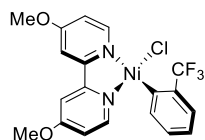

**5A** with Ni–C distance of 3.50 Å (dissociation limit) – CASSCF/NEVPT2 lowest transition energies with CPCM(THF) (10e,8o Active Space) – 25 triplet roots, 15 singlet roots. Active Space Orbitals (in order for CI vector notation below):  $d(xy)$ ,  $d(yz)$ ,  $d(z^2)$ ,  $d(xz)$ ,  $d(x^2-y^2)/C(sp^2)$ ,  $d(x^2-y^2)/C(sp^2)^*$ ,  $\pi^*(1)$ ,  $\pi^*(2)$ .

| State | Root | Multiplicity | $\Delta E/\text{nm}$ | $\Delta E/\text{kcal mol}^{-1}$ | CI vector | Contribution |
|-------|------|--------------|----------------------|---------------------------------|-----------|--------------|
| 0     | 0    | 1            | ---                  | ---                             | 22211110  | 0.7871       |
| 1     | 0    | 3            | 55769.1              | 0.5                             | 22211110  | 0.8239       |
| 2     | 1    | 3            | 15550.6              | 1.8                             | 22121110  | 0.9392       |
| 3     | 1    | 1            | 10973.8              | 2.6                             | 22121110  | 0.9314       |
| 4     | 2    | 3            | 9247.7               | 3.1                             | 22121110  | 0.9721       |
| 5     | 3    | 3            | 6819.8               | 4.2                             | 22211110  | 0.8468       |
| 6     | 4    | 3            | 4583.8               | 6.2                             | 21221110  | 0.8782       |
| 7     | 2    | 1            | 4365.6               | 6.5                             | 21221110  | 0.8470       |
| 8     | 5    | 3            | 4054.0               | 7.1                             | 21221110  | 0.8823       |
| 9     | 3    | 1            | 1548.4               | 18.5                            | 22211101  | 0.6819       |
|       |      |              |                      |                                 | 22121101  | 0.1414       |
| 10    | 6    | 3            | 1506.5               | 19.0                            | 22211101  | 0.7205       |
|       |      |              |                      |                                 | 22121101  | 0.1331       |
| 11    | 4    | 1            | 1448.5               | 19.7                            | 21212110  | 0.4783       |
|       |      |              |                      |                                 | 12221110  | 0.4608       |
| 12    | 7    | 3            | 1429.9               | 20.0                            | 21212110  | 0.4818       |
|       |      |              |                      |                                 | 12221110  | 0.4728       |
| 13    | 8    | 3            | 1343.3               | 21.3                            | 12221110  | 0.4855       |
|       |      |              |                      |                                 | 21212110  | 0.4615       |
| 14    | 9    | 3            | 1336.4               | 21.4                            | 22121101  | 0.9217       |
| 15    | 5    | 1            | 1332.2               | 21.5                            | 22121101  | 0.7904       |
|       |      |              |                      |                                 | 22211101  | 0.1225       |
| 16    | 10   | 3            | 1299.0               | 22.0                            | 22121101  | 0.8502       |
|       |      |              |                      |                                 | 22211101  | 0.1027       |
| 17    | 6    | 1            | 1265.6               | 22.6                            | 22220110  | 0.8247       |
| 18    | 11   | 3            | 1262.6               | 22.6                            | 22220110  | 0.8301       |
| 19    | 12   | 3            | 1236.8               | 23.1                            | 22211101  | 0.8279       |
| 20    | 13   | 3            | 1094.4               | 26.1                            | 21221101  | 0.8594       |



**5A** with Ni–C distance of 3.50 Å (dissociation limit) – CASSCF/QD-NEVPT2 lowest transition energies with CPCM(THF) (10e,8o Active Space) – 25 triplet roots, 15 singlet roots. Active Space Orbitals (in order for CI vector notation below): d(xy), d(yz), d(z<sup>2</sup>), d(xz), d(x<sup>2</sup>-y<sup>2</sup>)/C(sp<sup>2</sup>), d(x<sup>2</sup>-y<sup>2</sup>)/C(sp<sup>2</sup>)\*, π\*(1), π\*(2).

| State | Root | Multiplicity | ΔE/nm   | ΔE/kcal mol <sup>-1</sup> | CI vector | Contribution |
|-------|------|--------------|---------|---------------------------|-----------|--------------|
| 0     | 0    | 1            | ---     | ---                       | 22211110  | 0.7397       |
| 1     | 0    | 3            | 48638.1 | 0.6                       | 22211110  | 0.7761       |
| 2     | 1    | 3            | 11059.5 | 2.6                       | 22121110  | 0.9380       |
| 3     | 1    | 1            | 8488.2  | 3.4                       | 22121110  | 0.9403       |
| 4     | 2    | 3            | 7441.6  | 3.8                       | 22121110  | 0.9749       |
| 5     | 3    | 3            | 5812.6  | 4.9                       | 22211110  | 0.8428       |
| 6     | 4    | 3            | 4088.6  | 7.0                       | 21221110  | 0.8775       |
| 7     | 2    | 1            | 3929.7  | 7.3                       | 21221110  | 0.8400       |
| 8     | 5    | 3            | 3672.4  | 7.8                       | 21221110  | 0.8784       |
| 9     | 3    | 1            | 1467.7  | 19.5                      | 22211101  | 0.7295       |
| 10    | 6    | 3            | 1432.9  | 20.0                      | 22211101  | 0.7543       |
| 11    | 4    | 1            | 1398.2  | 20.4                      | 21212110  | 0.4707       |
|       |      |              |         |                           | 12221110  | 0.4406       |
| 12    | 7    | 3            | 1380.1  | 20.7                      | 21212110  | 0.4736       |
|       |      |              |         |                           | 12221110  | 0.4505       |
| 13    | 8    | 3            | 1300.0  | 22.0                      | 12221110  | 0.4725       |
|       |      |              |         |                           | 21212110  | 0.4556       |
| 14    | 9    | 3            | 1288.9  | 22.2                      | 22121101  | 0.9282       |
| 15    | 5    | 1            | 1271.3  | 22.5                      | 22121101  | 0.8944       |
| 16    | 10   | 3            | 1245.7  | 23.0                      | 22121101  | 0.8392       |
|       |      |              |         |                           | 22220110  | 0.1025       |
| 17    | 6    | 1            | 1224.2  | 23.4                      | 22220110  | 0.7998       |
| 18    | 11   | 3            | 1219.5  | 23.4                      | 22220110  | 0.7179       |
|       |      |              |         |                           | 22121101  | 0.1240       |
| 19    | 12   | 3            | 1199.0  | 23.8                      | 22211101  | 0.8424       |
| 20    | 7    | 1            | 1065.4  | 26.8                      | 21221101  | 0.8314       |





**5A** with Ni–C distance of 1.90 Å (near-equilibrium geometry) – CASSCF/NEVPT2 composition of the singlet ground state with CPCM(THF) (10e,9o Active Space) – 25 triplet roots, 15 singlet roots. Active Space Orbitals (in order for CI vector notation below):  $d(x^2-y^2)/C(sp^2)$ ,  $d(yz)$ ,  $d(z^2)$ ,  $d(xz)$ ,  $d(xy)$ ,  $d(x^2-y^2)/C(sp^2)^*$ ,  $\pi^*(1)$ ,  $\pi^*(2)$ ,  $\pi^*(3)$ .

| CI vector                      | Transition                                            | Contribution |
|--------------------------------|-------------------------------------------------------|--------------|
| 222220000                      | Closed-shell singlet (CSS) $d^8$                      | 0.6682       |
| 122221000                      | $d(x^2-y^2)/C(sp^2) \rightarrow d(x^2-y^2)/C(sp^2)^*$ | 0.2011       |
| 212220100                      | $d(yz) \rightarrow \pi^*(1)$                          | 0.0288       |
| 220222000                      | $2x[d(z^2)] \rightarrow 2x[d(x^2-y^2)/C(sp^2)^*]$     | 0.0213       |
| 222120100                      | $d(xz) \rightarrow \pi^*(1)$                          | 0.0174       |
| 222022000                      | $2x[d(xz)] \rightarrow 2x[d(x^2-y^2)/C(sp^2)^*]$      | 0.0148       |
| 202222000                      | $2x[d(yz)] \rightarrow 2x[d(x^2-y^2)/C(sp^2)^*]$      | 0.0131       |
| <b>Sum of CSS</b>              |                                                       | <b>67 %</b>  |
| <b>Sum of all MLCT</b>         |                                                       | <b>5 %</b>   |
| <b>Sum of all d-d</b>          |                                                       | <b>25 %</b>  |
| <b>Sum of mixed MLCT + d-d</b> |                                                       | <b>0 %</b>   |

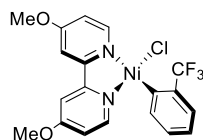

**5A** with Ni–C distance of 1.90 Å (near-equilibrium geometry) – CASSCF/QD-NEVPT2 composition of the singlet ground state with CPCM(THF) (10e,9o Active Space) – 25 triplet roots, 15 singlet roots. Active Space Orbitals (in order for CI vector notation below):  $d(x^2-y^2)/C(sp^2)$ ,  $d(yz)$ ,  $d(z^2)$ ,  $d(xz)$ ,  $d(xy)$ ,  $d(x^2-y^2)/C(sp^2)^*$ ,  $\pi^*(1)$ ,  $\pi^*(2)$ ,  $\pi^*(3)$ .

| CI vector                      | Transition                                            | Contribution |
|--------------------------------|-------------------------------------------------------|--------------|
| 222220000                      | Closed-shell singlet (CSS) $d^8$                      | 0.6088       |
| 122221000                      | $d(x^2-y^2)/C(sp^2) \rightarrow d(x^2-y^2)/C(sp^2)^*$ | 0.1616       |
| 212220100                      | $d(yz) \rightarrow \pi^*(1)$                          | 0.0725       |
| 222120100                      | $d(xz) \rightarrow \pi^*(1)$                          | 0.0486       |
| 222120010                      | $d(xz) \rightarrow \pi^*(2)$                          | 0.0205       |
| 220222000                      | $2x[d(z^2)] \rightarrow 2x[d(x^2-y^2)/C(sp^2)^*]$     | 0.0139       |
| 212220010                      | $d(yz) \rightarrow \pi^*(2)$                          | 0.0116       |
| <b>Sum of CSS</b>              |                                                       | <b>61 %</b>  |
| <b>Sum of all MLCT</b>         |                                                       | <b>15 %</b>  |
| <b>Sum of all d-d</b>          |                                                       | <b>18 %</b>  |
| <b>Sum of mixed MLCT + d-d</b> |                                                       | <b>0 %</b>   |

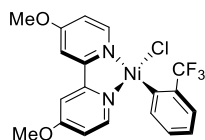

**5A** with Ni–C distance of 3.50 Å (dissociation limit) – CASSCF/NEVPT2 composition of the singlet ground state with CPCM(THF) (10e,8o Active Space) – 25 triplet roots, 15 singlet roots. Active Space Orbitals (in order for CI vector notation below):  $d(xy)$ ,  $d(yz)$ ,  $d(z^2)$ ,  $d(xz)$ ,  $d(x^2-y^2)/C(sp^2)$ ,  $d(x^2-y^2)/C(sp^2)^*$ ,  $\pi^*(1)$ ,  $\pi^*(2)$ .

| CI vector                      | Transition                                                                       | Contribution |
|--------------------------------|----------------------------------------------------------------------------------|--------------|
| 22211110                       | $d(xz) + d(x^2-y^2)/C(sp^2) \rightarrow d(x^2-y^2)/C(sp^2)^* + \pi^*(1)$         | 0.7871       |
| 22112110                       | $d(z^2) + d(xz) \rightarrow d(x^2-y^2)/C(sp^2)^* + \pi^*(1)$                     | 0.0498       |
| 11222110                       | $d(xy) + d(yz) \rightarrow d(x^2-y^2)/C(sp^2)^* + \pi^*(1)$                      | 0.0341       |
| 22221100                       | $d(x^2-y^2)/C(sp^2) \rightarrow d(x^2-y^2)/C(sp^2)^*$                            | 0.0303       |
| 21221110                       | $d(yz) + d(x^2-y^2)/C(sp^2) \rightarrow d(x^2-y^2)/C(sp^2)^* + \pi^*(1)$         | 0.0275       |
| 22212010                       | $d(xz) \rightarrow \pi^*(1)$                                                     | 0.0245       |
| 21122110                       | $d(yz) + d(z^2) \rightarrow d(x^2-y^2)/C(sp^2)^* + \pi^*(1)$                     | 0.0126       |
| 22210210                       | $2x[d(x^2-y^2)/C(sp^2)] + d(xz) \rightarrow 2x[d(x^2-y^2)/C(sp^2)^*] + \pi^*(1)$ | 0.0112       |
| <b>Sum of CSS</b>              |                                                                                  | <b>0 %</b>   |
| <b>Sum of all MLCT</b>         |                                                                                  | <b>2 %</b>   |
| <b>Sum of all d-d</b>          |                                                                                  | <b>3 %</b>   |
| <b>Sum of mixed MLCT + d-d</b> |                                                                                  | <b>92 %</b>  |

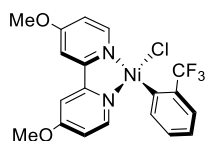

**5A** with Ni–C distance of 3.50 Å (dissociation limit) – CASSCF/QD-NEVPT2 composition of the singlet ground state with CPCM(THF) (10e,8o Active Space) – 25 triplet roots, 15 singlet roots. Active Space Orbitals (in order for CI vector notation below):  $d(xy)$ ,  $d(yz)$ ,  $d(z^2)$ ,  $d(xz)$ ,  $d(x^2-y^2)/C(sp^2)$ ,  $d(x^2-y^2)/C(sp^2)^*$ ,  $\pi^*(1)$ ,  $\pi^*(2)$ .

| CI vector                      | Transition                                                                       | Contribution |
|--------------------------------|----------------------------------------------------------------------------------|--------------|
| 22211110                       | $d(xz) + d(x^2-y^2)/C(sp^2) \rightarrow d(x^2-y^2)/C(sp^2)^* + \pi^*(1)$         | 0.7397       |
| 22112110                       | $d(z^2) + d(xz) \rightarrow d(x^2-y^2)/C(sp^2)^* + \pi^*(1)$                     | 0.0478       |
| 22211101                       | $d(xz) + d(x^2-y^2)/C(sp^2) \rightarrow d(x^2-y^2)/C(sp^2)^* + \pi^*(2)$         | 0.0456       |
| 22221100                       | $d(x^2-y^2)/C(sp^2) \rightarrow d(x^2-y^2)/C(sp^2)^*$                            | 0.0421       |
| 21221110                       | $d(yz) + d(x^2-y^2)/C(sp^2) \rightarrow d(x^2-y^2)/C(sp^2)^* + \pi^*(1)$         | 0.0289       |
| 11222110                       | $d(xy) + d(yz) \rightarrow d(x^2-y^2)/C(sp^2)^* + \pi^*(1)$                      | 0.0286       |
| 22212010                       | $d(xz) \rightarrow \pi^*(1)$                                                     | 0.0245       |
| 21122110                       | $d(yz) + d(z^2) \rightarrow d(x^2-y^2)/C(sp^2)^* + \pi^*(1)$                     | 0.0127       |
| 22210210                       | $2x[d(x^2-y^2)/C(sp^2)] + d(xz) \rightarrow 2x[d(x^2-y^2)/C(sp^2)^*] + \pi^*(1)$ | 0.0112       |
| <b>Sum of CSS</b>              |                                                                                  | <b>0 %</b>   |
| <b>Sum of all MLCT</b>         |                                                                                  | <b>2 %</b>   |
| <b>Sum of all d-d</b>          |                                                                                  | <b>4 %</b>   |
| <b>Sum of mixed MLCT + d-d</b> |                                                                                  | <b>91 %</b>  |

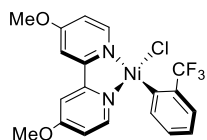

**5A** – CASSCF/NEVPT2 spin-orbit corrected absorption transitions for the CPCM(THF) phase spectrum (10e,9o Active Space) – 25 triplet roots, 15 singlet roots.

| <i>E</i> /nm | <i>E</i> /kcal mol <sup>-1</sup> | <i>f</i> <sub>osc</sub> | <i>E</i> /nm | <i>E</i> /kcal mol <sup>-1</sup> | <i>f</i> <sub>osc</sub> |
|--------------|----------------------------------|-------------------------|--------------|----------------------------------|-------------------------|
| 727.7        | 39.3                             | 0.0000000               | 440.2        | 65.0                             | 0.0000333               |
| 727.4        | 39.3                             | 0.0001255               | 435.8        | 65.6                             | 0.0000020               |
| 720.4        | 39.7                             | 0.0013855               | 435.6        | 65.6                             | 0.0004637               |
| 677.9        | 42.2                             | 0.0002915               | 435.5        | 65.7                             | 0.0003644               |
| 659.1        | 43.4                             | 0.0000026               | 428.9        | 66.7                             | 0.0004910               |
| 658.2        | 43.4                             | 0.0004405               | 419.0        | 68.2                             | 0.0555604               |
| 658.0        | 43.5                             | 0.0009273               | 396.1        | 72.2                             | 0.0000324               |
| 657.9        | 43.5                             | 0.0000334               | 396.0        | 72.2                             | 0.0000003               |
| 656.1        | 43.6                             | 0.0000623               | 395.0        | 72.4                             | 0.0069851               |
| 636.2        | 44.9                             | 0.0013500               | 367.5        | 77.8                             | 0.0027465               |
| 582.4        | 49.1                             | 0.0222252               | 360.1        | 79.4                             | 0.0000033               |
| 571.5        | 50.0                             | 0.0000002               | 358.4        | 79.8                             | 0.0000018               |
| 571.0        | 50.1                             | 0.0000891               | 356.5        | 80.2                             | 0.0000001               |
| 550.7        | 51.9                             | 0.0462952               | 350.6        | 81.5                             | 0.0002295               |
| 544.2        | 52.5                             | 0.0689565               | 349.2        | 81.9                             | 0.0000013               |
| 523.8        | 54.6                             | 0.0073317               | 345.1        | 82.9                             | 0.0001047               |
| 480.1        | 59.6                             | 0.0001107               | 342.2        | 83.6                             | 0.0000055               |
| 469.0        | 61.0                             | 0.0028735               | 339.4        | 84.2                             | 0.0000004               |
| 468.9        | 61.0                             | 0.0005841               | 336.5        | 85.0                             | 0.0000003               |
| 468.6        | 61.0                             | 0.0005584               | 326.0        | 87.7                             | 0.0000007               |
| 466.3        | 61.3                             | 0.0004236               | 325.9        | 87.7                             | 0.0001545               |
| 466.0        | 61.4                             | 0.0033030               | 325.9        | 87.7                             | 0.0000060               |
| 464.2        | 61.6                             | 0.0013212               | 301.3        | 94.9                             | 0.0000008               |
| 441.1        | 64.8                             | 0.0000228               | 301.3        | 94.9                             | 0.0000089               |
| 441.0        | 64.8                             | 0.0001296               | 301.2        | 94.9                             | 0.0000001               |



**5A** – CASSCF/QD-NEVPT2 spin-orbit corrected absorption transitions for the CPCM(THF) phase spectrum (10e,9o Active Space) – 25 triplet roots, 15 singlet roots.

| <i>E</i> /nm | <i>E</i> /kcal mol <sup>-1</sup> | <i>f</i> <sub>osc</sub> | <i>E</i> /nm | <i>E</i> /kcal mol <sup>-1</sup> | <i>f</i> <sub>osc</sub> |
|--------------|----------------------------------|-------------------------|--------------|----------------------------------|-------------------------|
| 743.7        | 38.4                             | 0.0043592               | 424.3        | 67.4                             | 0.0291560               |
| 694.4        | 41.2                             | 0.0000313               | 423.3        | 67.5                             | 0.0005625               |
| 692.6        | 41.3                             | 0.0000037               | 423.2        | 67.6                             | 0.0001703               |
| 691.4        | 41.4                             | 0.0001142               | 423.2        | 67.6                             | 0.0002439               |
| 685.9        | 41.7                             | 0.0000230               | 419.6        | 68.1                             | 0.0011378               |
| 685.5        | 41.7                             | 0.0000006               | 398.1        | 71.8                             | 0.0009310               |
| 682.6        | 41.9                             | 0.0000228               | 392.8        | 72.8                             | 0.0469430               |
| 643.0        | 44.5                             | 0.0000536               | 383.7        | 74.5                             | 0.0132725               |
| 631.3        | 45.3                             | 0.0000974               | 383.0        | 74.7                             | 0.0023325               |
| 628.7        | 45.5                             | 0.0000029               | 382.9        | 74.7                             | 0.0000539               |
| 620.7        | 46.1                             | 0.0001633               | 379.5        | 75.3                             | 0.0115176               |
| 552.7        | 51.7                             | 0.0002165               | 350.9        | 81.5                             | 0.0000928               |
| 550.9        | 51.9                             | 0.0000391               | 349.8        | 81.7                             | 0.0000396               |
| 550.1        | 52.0                             | 0.0000016               | 346.9        | 82.4                             | 0.0000086               |
| 534.0        | 53.5                             | 0.0019465               | 341.5        | 83.7                             | 0.0000195               |
| 478.7        | 59.7                             | 0.0012088               | 339.5        | 84.2                             | 0.0001433               |
| 454.2        | 63.0                             | 0.0003541               | 334.5        | 85.5                             | 0.0000033               |
| 450.4        | 63.5                             | 0.0005539               | 333.3        | 85.8                             | 0.0000828               |
| 450.3        | 63.5                             | 0.0000046               | 331.0        | 86.4                             | 0.0000956               |
| 447.0        | 64.0                             | 0.0172130               | 327.5        | 87.3                             | 0.0001993               |
| 441.9        | 64.7                             | 0.1192444               | 319.4        | 89.5                             | 0.0000182               |
| 435.7        | 65.6                             | 0.0115876               | 319.4        | 89.5                             | 0.0000047               |
| 426.8        | 67.0                             | 0.0005033               | 319.4        | 89.5                             | 0.0002590               |
| 424.6        | 67.3                             | 0.0000250               |              |                                  |                         |



**5A** – TD-DFT (B3LYP) absorption transitions (singlets only) for the CPCM(THF) phase spectrum.

| <i>E</i> /nm | <i>E</i> /kcal mol <sup>-1</sup> | <i>f</i> <sub>osc</sub> | <i>E</i> /nm | <i>E</i> /kcal mol <sup>-1</sup> | <i>f</i> <sub>osc</sub> |
|--------------|----------------------------------|-------------------------|--------------|----------------------------------|-------------------------|
| 617.6        | 46.3                             | 0.0000000               | 372.1        | 76.8                             | 0.0018163               |
| 538.9        | 53.1                             | 0.0000000               | 364.7        | 78.4                             | 0.0000000               |
| 526.8        | 54.3                             | 0.0026130               | 362.6        | 78.9                             | 0.0000000               |
| 524.3        | 54.5                             | 0.0008767               | 352.9        | 81.0                             | 0.0000000               |
| 514.6        | 55.6                             | 0.0001662               | 345.8        | 82.7                             | 0.0294493               |
| 503.8        | 56.8                             | 0.0000000               | 332.5        | 86.0                             | 0.0002838               |
| 473.8        | 60.3                             | 0.0001474               | 323.7        | 88.3                             | 0.0000000               |
| 467.1        | 61.2                             | 0.0280085               | 322.6        | 88.6                             | 0.0000000               |
| 463.2        | 61.7                             | 0.0001371               | 321.6        | 88.9                             | 0.0000000               |
| 426.7        | 67.0                             | 0.0000000               | 319.5        | 89.5                             | 0.0088811               |
| 414.8        | 68.9                             | 0.0037821               | 316.1        | 90.5                             | 0.0128510               |
| 411.3        | 69.5                             | 0.0451656               | 315.6        | 90.6                             | 0.0000000               |
| 411.1        | 69.5                             | 0.0004231               | 313.7        | 91.1                             | 0.0000000               |
| 408.6        | 70.0                             | 0.0000000               | 308.8        | 92.6                             | 0.0000000               |
| 399.7        | 71.5                             | 0.0000000               | 308.2        | 92.8                             | 0.0164028               |
| 384.7        | 74.3                             | 0.0000000               | 305.8        | 93.5                             | 0.0000000               |
| 384.6        | 74.3                             | 0.0005443               | 302.3        | 94.6                             | 0.0000000               |



**5A** – TD-DFT (B3LYP) absorption transitions (singlets only) for the CPCM(Toluene) phase spectrum.

| <i>E</i> /nm | <i>E</i> /kcal mol <sup>-1</sup> | <i>f</i> <sub>osc</sub> | <i>E</i> /nm | <i>E</i> /kcal mol <sup>-1</sup> | <i>f</i> <sub>osc</sub> |
|--------------|----------------------------------|-------------------------|--------------|----------------------------------|-------------------------|
| 618.8        | 46.2                             | 0.0000000               | 358.7        | 79.7                             | 0.0003967               |
| 613.4        | 46.6                             | 0.0000000               | 356.0        | 80.3                             | 0.0000000               |
| 581.4        | 49.2                             | 0.0000000               | 355.9        | 80.3                             | 0.0054505               |
| 574.1        | 49.8                             | 0.0009198               | 355.8        | 80.4                             | 0.0000000               |
| 530.0        | 53.9                             | 0.0041366               | 350.5        | 81.6                             | 0.0050564               |
| 517.0        | 55.3                             | 0.0006762               | 345.9        | 82.7                             | 0.0049042               |
| 513.4        | 55.7                             | 0.0258027               | 343.8        | 83.2                             | 0.0000000               |
| 492.9        | 58.0                             | 0.0000000               | 336.8        | 84.9                             | 0.0134649               |
| 482.1        | 59.3                             | 0.0000000               | 334.2        | 85.6                             | 0.0000000               |
| 470.6        | 60.8                             | 0.0003034               | 328.6        | 87.0                             | 0.0000000               |
| 470.4        | 60.8                             | 0.0000000               | 325.7        | 87.8                             | 0.0000000               |
| 469.7        | 60.9                             | 0.0046153               | 322.7        | 88.6                             | 0.0053990               |
| 465.6        | 61.4                             | 0.0000544               | 312.5        | 91.5                             | 0.0000000               |
| 465.5        | 61.4                             | 0.0053189               | 312.3        | 91.6                             | 0.0008353               |
| 459.3        | 62.3                             | 0.0323322               | 312.2        | 91.6                             | 0.0000000               |
| 425.6        | 67.2                             | 0.0006041               | 311.9        | 91.7                             | 0.0244716               |
| 416.3        | 68.7                             | 0.0000000               | 311.7        | 91.7                             | 0.0000000               |
| 387.5        | 73.8                             | 0.0009981               | 310.9        | 92.0                             | 0.0000000               |
| 381.7        | 74.9                             | 0.0358144               | 306.6        | 93.3                             | 0.0000000               |
| 381.4        | 75.0                             | 0.0000000               | 302.9        | 94.4                             | 0.0000000               |
| 381.3        | 75.0                             | 0.0000000               | 302.4        | 94.5                             | 0.0245231               |
| 366.9        | 77.9                             | 0.0000000               | 301.3        | 94.9                             | 0.0000000               |
| 361.4        | 79.1                             | 0.0000000               |              |                                  |                         |

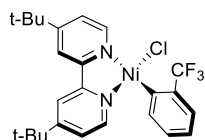

**5B** with Ni–C distance of 1.90 Å (near-equilibrium geometry) – CASSCF/NEVPT2 lowest transition energies with CPCM(THF) (10e,9o Active Space) – 25 triplet roots, 15 singlet roots. Active Space Orbitals (in order for CI vector notation below):  $d(x^2-y^2)/C(sp^2)$ ,  $d(xy)$ ,  $d(yz)$ ,  $d(z^2)$ ,  $d(xz)$ ,  $d(x^2-y^2)/C(sp^2)^*$ ,  $\pi^*(1)$ ,  $\pi^*(2)$ ,  $\pi^*(3)$ .

| State | Root | Multiplicity | $\Delta E/\text{nm}$ | $\Delta E/\text{kcal mol}^{-1}$ | CI vector | Contribution |
|-------|------|--------------|----------------------|---------------------------------|-----------|--------------|
| 0     | 0    | 1            | ---                  | ---                             | 222220000 | 0.6130       |
|       |      |              |                      |                                 | 122221000 | 0.1533       |
| 1     | 0    | 3            | 988.5                | 28.9                            | 222211000 | 0.5353       |
|       |      |              |                      |                                 | 222121000 | 0.2726       |
| 2     | 1    | 3            | 856.5                | 33.4                            | 222121000 | 0.3752       |
|       |      |              |                      |                                 | 222211000 | 0.2249       |
|       |      |              |                      |                                 | 221221000 | 0.1842       |
| 3     | 2    | 3            | 783.5                | 36.5                            | 221221000 | 0.5651       |
|       |      |              |                      |                                 | 222121000 | 0.1533       |
| 4     | 3    | 3            | 680.1                | 42.0                            | 222210100 | 0.5656       |
|       |      |              |                      |                                 | 222120100 | 0.2926       |
| 5     | 1    | 1            | 666.7                | 42.9                            | 222210100 | 0.5630       |
|       |      |              |                      |                                 | 222120100 | 0.2924       |
| 6     | 4    | 3            | 625.6                | 45.7                            | 222120100 | 0.5494       |
|       |      |              |                      |                                 | 222210100 | 0.2925       |
| 7     | 5    | 3            | 591.6                | 48.3                            | 212221000 | 0.6849       |
|       |      |              |                      |                                 | 112222000 | 0.1082       |
| 8     | 2    | 1            | 590.0                | 48.5                            | 222120100 | 0.2946       |
|       |      |              |                      |                                 | 221220100 | 0.2824       |
| 9     | 6    | 3            | 550.3                | 52.0                            | 221220100 | 0.7918       |
| 10    | 3    | 1            | 513.7                | 55.7                            | 221220100 | 0.4651       |
|       |      |              |                      |                                 | 222120100 | 0.1740       |
| 11    | 4    | 1            | 451.7                | 63.3                            | 221221000 | 0.3554       |
|       |      |              |                      |                                 | 222121000 | 0.1758       |
| 12    | 5    | 1            | 448.3                | 63.8                            | 222211000 | 0.4873       |
|       |      |              |                      |                                 | 222121000 | 0.2427       |
| 13    | 7    | 3            | 429.8                | 66.5                            | 222210010 | 0.5656       |
|       |      |              |                      |                                 | 222120010 | 0.2870       |
| 14    | 6    | 1            | 427.9                | 66.8                            | 222210010 | 0.5638       |
|       |      |              |                      |                                 | 222120010 | 0.2853       |
| 15    | 7    | 1            | 424.2                | 67.4                            | 222121000 | 0.3404       |
|       |      |              |                      |                                 | 221221000 | 0.2770       |
| 16    | 8    | 1            | 422.7                | 67.6                            | 212221000 | 0.7112       |
| 17    | 8    | 3            | 417.0                | 68.6                            | 212220100 | 0.7424       |
| 18    | 9    | 3            | 411.1                | 69.6                            | 222120010 | 0.5442       |
|       |      |              |                      |                                 | 222210010 | 0.2872       |
| 19    | 9    | 1            | 400.6                | 71.4                            | 212220100 | 0.6219       |
|       |      |              |                      |                                 | 221221000 | 0.1064       |
| 20    | 10   | 1            | 393.5                | 72.7                            | 222120010 | 0.5021       |
|       |      |              |                      |                                 | 222210010 | 0.2672       |

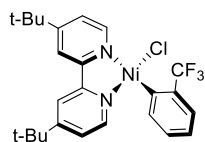

**5B** with Ni–C distance of 1.90 Å (near-equilibrium geometry) – CASSCF/QD-NEVPT2 lowest transition energies with CPCM(THF) (10e,9o Active Space) – 25 triplet roots, 15 singlet roots. Active Space Orbitals (in order for CI vector notation below):  $d(x^2-y^2)/C(sp^2)$ ,  $d(xy)$ ,  $d(yz)$ ,  $d(z^2)$ ,  $d(xz)$ ,  $d(x^2-y^2)/C(sp^2)^*$ ,  $\pi^*(1)$ ,  $\pi^*(2)$ ,  $\pi^*(3)$ .

| State | Root | Multiplicity | $\Delta E/\text{nm}$ | $\Delta E/\text{kcal mol}^{-1}$ | CI vector | Contribution |
|-------|------|--------------|----------------------|---------------------------------|-----------|--------------|
| 0     | 0    | 1            | ---                  | ---                             | 222220000 | 0.5893       |
|       |      |              |                      |                                 | 122221000 | 0.1375       |
| 1     | 0    | 3            | 989.2                | 28.9                            | 222211000 | 0.5366       |
|       |      |              |                      |                                 | 222121000 | 0.2580       |
| 2     | 1    | 3            | 867.8                | 32.9                            | 222121000 | 0.3381       |
|       |      |              |                      |                                 | 221221000 | 0.2468       |
| 3     | 2    | 3            | 785.1                | 36.4                            | 221221000 | 0.4995       |
|       |      |              |                      |                                 | 222121000 | 0.1908       |
| 4     | 3    | 3            | 676.4                | 42.3                            | 222210100 | 0.5559       |
|       |      |              |                      |                                 | 222120100 | 0.2891       |
| 5     | 1    | 1            | 664.1                | 43.1                            | 222210100 | 0.5732       |
|       |      |              |                      |                                 | 222120100 | 0.2831       |
| 6     | 4    | 3            | 631.0                | 45.3                            | 212221000 | 0.5541       |
|       |      |              |                      |                                 | 222120100 | 0.1386       |
| 7     | 5    | 3            | 618.7                | 46.2                            | 222120100 | 0.4023       |
|       |      |              |                      |                                 | 222210100 | 0.2302       |
| 8     | 2    | 1            | 592.2                | 48.3                            | 221220100 | 0.3597       |
|       |      |              |                      |                                 | 222120100 | 0.2658       |
| 9     | 6    | 3            | 548.0                | 52.2                            | 221220100 | 0.7743       |
|       |      |              |                      |                                 | 222120100 | 0.1871       |
| 10    | 3    | 1            | 517.0                | 55.3                            | 221220100 | 0.4027       |
|       |      |              |                      |                                 | 222120100 | 0.1871       |
| 11    | 4    | 1            | 475.5                | 60.1                            | 212220100 | 0.4754       |
|       |      |              |                      |                                 | 221221000 | 0.1327       |
| 12    | 5    | 1            | 449.8                | 63.6                            | 222211000 | 0.4273       |
|       |      |              |                      |                                 | 222121000 | 0.1955       |
| 13    | 7    | 3            | 428.7                | 66.7                            | 222210010 | 0.5529       |
|       |      |              |                      |                                 | 222120010 | 0.2789       |
| 14    | 6    | 1            | 426.5                | 67.0                            | 222210010 | 0.3865       |
|       |      |              |                      |                                 | 222120010 | 0.2413       |
| 15    | 7    | 1            | 424.3                | 67.4                            | 222121000 | 0.3795       |
|       |      |              |                      |                                 | 221221000 | 0.1696       |
| 16    | 8    | 1            | 419.5                | 68.2                            | 212221000 | 0.4735       |
|       |      |              |                      |                                 | 222121000 | 0.1324       |
| 17    | 8    | 3            | 416.9                | 68.6                            | 212220100 | 0.7423       |
|       |      |              |                      |                                 | 222120010 | 0.5466       |
| 18    | 9    | 3            | 409.5                | 69.8                            | 222210010 | 0.2802       |
|       |      |              |                      |                                 | 222120010 | 0.2802       |
| 19    | 9    | 1            | 389.1                | 73.5                            | 222120010 | 0.2976       |
|       |      |              |                      |                                 | 222210010 | 0.1885       |
| 20    | 10   | 1            | 381.1                | 75.0                            | 221221000 | 0.3693       |
|       |      |              |                      |                                 | 212220100 | 0.2237       |





**5B** with Ni–C distance of 3.50 Å (dissociation limit) – CASSCF/NEVPT2 lowest transition energies with CPCM(THF) (10e,8o Active Space) – 25 triplet roots, 15 singlet roots. Active Space Orbitals (in order for CI vector notation below): d(xy), d(yz), d(z<sup>2</sup>), d(xz), d(x<sup>2</sup>-y<sup>2</sup>)/C(sp<sup>2</sup>), d(x<sup>2</sup>-y<sup>2</sup>)/C(sp<sup>2</sup>)\*, π\*(1), π\*(2).

| State | Root | Multiplicity | ΔE/nm   | ΔE/kcal mol <sup>-1</sup> | CI vector | Contribution |
|-------|------|--------------|---------|---------------------------|-----------|--------------|
| 0     | 0    | 1            | ---     | ---                       | 22211110  | 0.7774       |
| 1     | 0    | 3            | 46023.6 | 0.6                       | 22211110  | 0.8118       |
| 2     | 1    | 3            | 8458.0  | 3.4                       | 22121110  | 0.9398       |
| 3     | 1    | 1            | 6592.9  | 4.3                       | 22121110  | 0.9371       |
| 4     | 2    | 3            | 5878.4  | 4.9                       | 22121110  | 0.9779       |
| 5     | 3    | 3            | 4913.0  | 5.8                       | 22211110  | 0.8483       |
| 6     | 4    | 3            | 3533.7  | 8.1                       | 21221110  | 0.8840       |
| 7     | 2    | 1            | 3394.7  | 8.4                       | 21221110  | 0.8426       |
| 8     | 5    | 3            | 3200.6  | 8.9                       | 21221110  | 0.8812       |
| 9     | 3    | 1            | 1365.4  | 20.9                      | 21212110  | 0.4756       |
|       |      |              |         |                           | 12221110  | 0.4544       |
| 10    | 6    | 3            | 1349.8  | 21.2                      | 21212110  | 0.4805       |
|       |      |              |         |                           | 12221110  | 0.4677       |
| 11    | 4    | 1            | 1241.0  | 23.0                      | 22211101  | 0.7911       |
| 12    | 7    | 3            | 1237.2  | 23.1                      | 12221110  | 0.4922       |
|       |      |              |         |                           | 21212110  | 0.4535       |
| 13    | 8    | 3            | 1212.2  | 23.6                      | 22211101  | 0.8210       |
| 14    | 9    | 3            | 1198.5  | 23.9                      | 22220110  | 0.8361       |
| 15    | 5    | 1            | 1198.2  | 23.9                      | 22220110  | 0.8348       |
| 16    | 10   | 3            | 1182.5  | 24.2                      | 22121101  | 0.9343       |
| 17    | 6    | 1            | 1180.1  | 24.2                      | 22121101  | 0.9209       |
| 18    | 11   | 3            | 1152.5  | 24.8                      | 22121101  | 0.9635       |
| 19    | 12   | 3            | 1094.1  | 26.1                      | 22211101  | 0.8417       |
| 20    | 13   | 3            | 986.2   | 29.0                      | 21221101  | 0.8738       |



**5B** with Ni–C distance of 3.50 Å (dissociation limit) – CASSCF/QD-NEVPT2 lowest transition energies with CPCM(THF) (10e,8o Active Space) – 25 triplet roots, 15 singlet roots. Active Space Orbitals (in order for CI vector notation below): d(xy), d(yz), d(z<sup>2</sup>), d(xz), d(x<sup>2</sup>-y<sup>2</sup>)/C(sp<sup>2</sup>), d(x<sup>2</sup>-y<sup>2</sup>)/C(sp<sup>2</sup>)\*, π\*(1), π\*(2).

| State | Root | Multiplicity | ΔE/nm   | ΔE/kcal mol <sup>-1</sup> | CI vector | Contribution |
|-------|------|--------------|---------|---------------------------|-----------|--------------|
| 0     | 0    | 1            | ---     | ---                       | 22211110  | 0.7386       |
| 1     | 0    | 3            | 41963.9 | 0.7                       | 22211110  | 0.7774       |
| 2     | 1    | 3            | 7274.8  | 3.9                       | 22121110  | 0.9385       |
| 3     | 1    | 1            | 5852.7  | 4.9                       | 22121110  | 0.9370       |
| 4     | 2    | 3            | 5279.0  | 5.4                       | 22121110  | 0.9787       |
| 5     | 3    | 3            | 4495.8  | 6.4                       | 22211110  | 0.8436       |
| 6     | 4    | 3            | 3310.2  | 8.6                       | 21221110  | 0.8795       |
| 7     | 2    | 1            | 3193.2  | 9.0                       | 21221110  | 0.8325       |
| 8     | 5    | 3            | 3018.1  | 9.5                       | 21221110  | 0.8752       |
| 9     | 3    | 1            | 1333.6  | 21.4                      | 21212110  | 0.4786       |
|       |      |              |         |                           | 12221110  | 0.4453       |
| 10    | 6    | 3            | 1317.9  | 21.7                      | 21212110  | 0.4879       |
|       |      |              |         |                           | 12221110  | 0.4611       |
| 11    | 7    | 3            | 1211.8  | 23.6                      | 12221110  | 0.4650       |
|       |      |              |         |                           | 21212110  | 0.4348       |
| 12    | 4    | 1            | 1199.9  | 23.8                      | 22211101  | 0.7540       |
| 13    | 8    | 3            | 1176.0  | 24.3                      | 22211101  | 0.5754       |
|       |      |              |         |                           | 22220110  | 0.1859       |
| 14    | 5    | 1            | 1172.0  | 24.4                      | 22220110  | 0.8046       |
| 15    | 9    | 3            | 1169.2  | 24.5                      | 22220110  | 0.5908       |
|       |      |              |         |                           | 22211101  | 0.2056       |
| 16    | 10   | 3            | 1156.1  | 24.7                      | 22121101  | 0.9139       |
| 17    | 6    | 1            | 1149.9  | 24.9                      | 22121101  | 0.8873       |
| 18    | 11   | 3            | 1123.7  | 25.4                      | 22121101  | 0.9555       |
| 19    | 12   | 3            | 1071.5  | 26.7                      | 22211101  | 0.8453       |
| 20    | 7    | 1            | 982.7   | 29.1                      | 21221101  | 0.5914       |
|       |      |              |         |                           | 12212110  | 0.2454       |

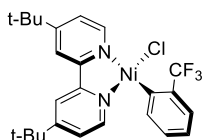

**5B** with Ni–C distance of 1.90 Å (near-equilibrium geometry) – CASSCF/NEVPT2 composition of the singlet ground state with CPCM(THF) (10e,9o Active Space) – 25 triplet roots, 15 singlet roots. Active Space Orbitals (in order for CI vector notation below):  $d(x^2-y^2)/C(sp^2)$ ,  $d(xy)$ ,  $d(yz)$ ,  $d(z^2)$ ,  $d(xz)$ ,  $d(x^2-y^2)/C(sp^2)^*$ ,  $\pi^*(1)$ ,  $\pi^*(2)$ ,  $\pi^*(3)$ .

| CI vector                      | Transition                                            | Contribution |
|--------------------------------|-------------------------------------------------------|--------------|
| 222220000                      | Closed-shell singlet (CSS) $d^8$                      | 0.6130       |
| 122221000                      | $d(x^2-y^2)/C(sp^2) \rightarrow d(x^2-y^2)/C(sp^2)^*$ | 0.1533       |
| 222120100                      | $d(z^2) \rightarrow \pi^*(1)$                         | 0.0717       |
| 222210100                      | $d(xz) \rightarrow \pi^*(1)$                          | 0.0387       |
| 221220100                      | $d(yz) \rightarrow \pi^*(1)$                          | 0.0188       |
| 221220001                      | $d(yz) \rightarrow \pi^*(3)$                          | 0.0132       |
| 222202000                      | $2x[d(xz)] \rightarrow 2x[d(x^2-y^2)/C(sp^2)^*]$      | 0.0129       |
| 222022000                      | $2x[d(z^2)] \rightarrow 2x[d(x^2-y^2)/C(sp^2)^*]$     | 0.0113       |
| 222120010                      | $d(z^2) \rightarrow \pi^*(2)$                         | 0.0103       |
| <b>Sum of CSS</b>              |                                                       | <b>61 %</b>  |
| <b>Sum of all MLCT</b>         |                                                       | <b>15 %</b>  |
| <b>Sum of all d-d</b>          |                                                       | <b>18 %</b>  |
| <b>Sum of mixed MLCT + d-d</b> |                                                       | <b>0 %</b>   |

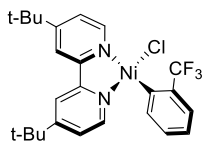

**5B** with Ni–C distance of 1.90 Å (near-equilibrium geometry) – CASSCF/QD-NEVPT2 composition of the singlet ground state with CPCM(THF) (10e,9o Active Space) – 25 triplet roots, 15 singlet roots. Active Space Orbitals (in order for CI vector notation below):  $d(x^2-y^2)/C(sp^2)$ ,  $d(xy)$ ,  $d(yz)$ ,  $d(z^2)$ ,  $d(xz)$ ,  $d(x^2-y^2)/C(sp^2)^*$ ,  $\pi^*(1)$ ,  $\pi^*(2)$ ,  $\pi^*(3)$ .

| CI vector                      | Transition                                            | Contribution |
|--------------------------------|-------------------------------------------------------|--------------|
| 222220000                      | Closed-shell singlet (CSS) $d^8$                      | 0.58926      |
| 122221000                      | $d(x^2-y^2)/C(sp^2) \rightarrow d(x^2-y^2)/C(sp^2)^*$ | 0.13746      |
| 222120100                      | $d(z^2) \rightarrow \pi^*(1)$                         | 0.08390      |
| 222210100                      | $d(xz) \rightarrow \pi^*(1)$                          | 0.04183      |
| 221220100                      | $d(yz) \rightarrow \pi^*(1)$                          | 0.02295      |
| 222120010                      | $d(z^2) \rightarrow \pi^*(2)$                         | 0.02061      |
| 221220001                      | $d(yz) \rightarrow \pi^*(3)$                          | 0.01262      |
| 222202000                      | $2x[d(xz)] \rightarrow 2x[d(x^2-y^2)/C(sp^2)^*]$      | 0.01109      |
| <b>Sum of CSS</b>              |                                                       | <b>59 %</b>  |
| <b>Sum of all MLCT</b>         |                                                       | <b>18 %</b>  |
| <b>Sum of all d-d</b>          |                                                       | <b>15 %</b>  |
| <b>Sum of mixed MLCT + d-d</b> |                                                       | <b>0 %</b>   |



**5B** with Ni–C distance of 3.50 Å (dissociation limit) – CASSCF/NEVPT2 composition of the singlet ground state with CPCM(THF) (10e,8o Active Space) – 25 triplet roots, 15 singlet roots. Active Space Orbitals (in order for CI vector notation below):  $d(xy)$ ,  $d(yz)$ ,  $d(z^2)$ ,  $d(xz)$ ,  $d(x^2-y^2)/C(sp^2)$ ,  $d(x^2-y^2)/C(sp^2)^*$ ,  $\pi^*(1)$ ,  $\pi^*(2)$ .

| CI vector                      | Transition                                                                       | Contribution |
|--------------------------------|----------------------------------------------------------------------------------|--------------|
| 22211110                       | $d(xz) + d(x^2-y^2)/C(sp^2) \rightarrow d(x^2-y^2)/C(sp^2)^* + \pi^*(1)$         | 0.7774       |
| 22112110                       | $d(z^2) + d(xz) \rightarrow d(x^2-y^2)/C(sp^2)^* + \pi^*(1)$                     | 0.0569       |
| 22221100                       | $d(x^2-y^2)/C(sp^2) \rightarrow d(x^2-y^2)/C(sp^2)^*$                            | 0.0410       |
| 11222110                       | $d(xy) + d(yz) \rightarrow d(x^2-y^2)/C(sp^2)^* + \pi^*(1)$                      | 0.0310       |
| 21221110                       | $d(yz) + d(x^2-y^2)/C(sp^2) \rightarrow d(x^2-y^2)/C(sp^2)^* + \pi^*(1)$         | 0.0298       |
| 22212010                       | $d(xz) \rightarrow \pi^*(1)$                                                     | 0.0265       |
| 22210210                       | $2x[d(x^2-y^2)/C(sp^2)] + d(xz) \rightarrow 2x[d(x^2-y^2)/C(sp^2)^*] + \pi^*(1)$ | 0.0120       |
| <b>Sum of CSS</b>              |                                                                                  | <b>0 %</b>   |
| <b>Sum of all MLCT</b>         |                                                                                  | <b>3 %</b>   |
| <b>Sum of all d-d</b>          |                                                                                  | <b>4 %</b>   |
| <b>Sum of mixed MLCT + d-d</b> |                                                                                  | <b>91 %</b>  |

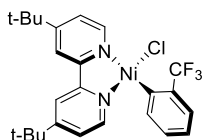

**5B** with Ni–C distance of 3.50 Å (dissociation limit) – CASSCF/QD-NEVPT2 composition of the singlet ground state with CPCM(THF) (10e,8o Active Space) – 25 triplet roots, 15 singlet roots. Active Space Orbitals (in order for CI vector notation below):  $d(xy)$ ,  $d(yz)$ ,  $d(z^2)$ ,  $d(xz)$ ,  $d(x^2-y^2)/C(sp^2)$ ,  $d(x^2-y^2)/C(sp^2)^*$ ,  $\pi^*(1)$ ,  $\pi^*(2)$ .

| CI vector                      | Transition                                                                       | Contribution |
|--------------------------------|----------------------------------------------------------------------------------|--------------|
| 22211110                       | $d(xz) + d(x^2-y^2)/C(sp^2) \rightarrow d(x^2-y^2)/C(sp^2)^* + \pi^*(1)$         | 0.7386       |
| 22112110                       | $d(z^2) + d(xz) \rightarrow d(x^2-y^2)/C(sp^2)^* + \pi^*(1)$                     | 0.0546       |
| 22221100                       | $d(x^2-y^2)/C(sp^2) \rightarrow d(x^2-y^2)/C(sp^2)^*$                            | 0.0502       |
| 21221110                       | $d(yz) + d(x^2-y^2)/C(sp^2) \rightarrow d(x^2-y^2)/C(sp^2)^* + \pi^*(1)$         | 0.0340       |
| 22211101                       | $d(xz) + d(x^2-y^2)/C(sp^2) \rightarrow d(x^2-y^2)/C(sp^2)^* + \pi^*(2)$         | 0.0282       |
| 22212010                       | $d(xz) \rightarrow \pi^*(1)$                                                     | 0.0270       |
| 11222110                       | $d(xy) + d(yz) \rightarrow d(x^2-y^2)/C(sp^2)^* + \pi^*(1)$                      | 0.0261       |
| 22210210                       | $2x[d(x^2-y^2)/C(sp^2)] + d(xz) \rightarrow 2x[d(x^2-y^2)/C(sp^2)^*] + \pi^*(1)$ | 0.0122       |
| <b>Sum of CSS</b>              |                                                                                  | <b>0 %</b>   |
| <b>Sum of all MLCT</b>         |                                                                                  | <b>3 %</b>   |
| <b>Sum of all d-d</b>          |                                                                                  | <b>5 %</b>   |
| <b>Sum of mixed MLCT + d-d</b> |                                                                                  | <b>89 %</b>  |

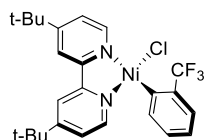

**5B** – CASSCF/NEVPT2 spin-orbit corrected absorption transitions for the CPCM(THF) phase spectrum (10e,9o Active Space) – 25 triplet roots, 15 singlet roots.

| <i>E</i> /nm | <i>E</i> /kcal mol <sup>-1</sup> | <i>f</i> <sub>osc</sub> | <i>E</i> /nm | <i>E</i> /kcal mol <sup>-1</sup> | <i>f</i> <sub>osc</sub> |
|--------------|----------------------------------|-------------------------|--------------|----------------------------------|-------------------------|
| 775.3        | 36.9                             | 0.0000035               | 407.4        | 70.2                             | 0.0000892               |
| 773.4        | 37.0                             | 0.0000058               | 399.5        | 71.6                             | 0.0018597               |
| 758.8        | 37.7                             | 0.0000320               | 392.4        | 72.9                             | 0.1140947               |
| 689.3        | 41.5                             | 0.0002312               | 381.4        | 75.0                             | 0.0059127               |
| 689.1        | 41.5                             | 0.0000027               | 381.0        | 75.0                             | 0.0000009               |
| 684.3        | 41.8                             | 0.0034615               | 380.3        | 75.2                             | 0.0000480               |
| 677.7        | 42.2                             | 0.0007548               | 379.9        | 75.3                             | 0.0004501               |
| 620.8        | 46.1                             | 0.0014952               | 367.3        | 77.8                             | 0.0013154               |
| 620.4        | 46.1                             | 0.0000474               | 363.4        | 78.7                             | 0.0000009               |
| 619.3        | 46.2                             | 0.0001672               | 363.3        | 78.7                             | 0.0000107               |
| 592.2        | 48.3                             | 0.0394283               | 362.9        | 78.8                             | 0.0063497               |
| 588.8        | 48.6                             | 0.0000042               | 354.4        | 80.7                             | 0.0566202               |
| 588.4        | 48.6                             | 0.0000584               | 351.3        | 81.4                             | 0.0000155               |
| 581.6        | 49.2                             | 0.0304658               | 351.2        | 81.4                             | 0.0000160               |
| 544.2        | 52.5                             | 0.0009812               | 349.2        | 81.9                             | 0.0002629               |
| 543.5        | 52.6                             | 0.0000377               | 333.8        | 85.7                             | 0.0031656               |
| 543.2        | 52.6                             | 0.0001405               | 333.6        | 85.7                             | 0.0000029               |
| 509.2        | 56.2                             | 0.2122996               | 333.6        | 85.7                             | 0.0004599               |
| 450.3        | 63.5                             | 0.0002267               | 315.9        | 90.5                             | 0.0000020               |
| 446.9        | 64.0                             | 0.0018854               | 314.6        | 90.9                             | 0.0000000               |
| 433.8        | 65.9                             | 0.0000005               | 313.4        | 91.2                             | 0.0000007               |
| 433.7        | 65.9                             | 0.0000021               | 309.3        | 92.4                             | 0.0000839               |
| 432.1        | 66.2                             | 0.0006937               | 308.5        | 92.7                             | 0.0000159               |
| 431.7        | 66.2                             | 0.0066270               | 307.7        | 92.9                             | 0.0003997               |
| 423.6        | 67.5                             | 0.0009687               | 307.7        | 92.9                             | 0.0000187               |
| 421.9        | 67.8                             | 0.0006371               | 307.6        | 92.9                             | 0.0001200               |
| 415.1        | 68.9                             | 0.0007007               | 307.6        | 92.9                             | 0.0001895               |
| 415.0        | 68.9                             | 0.0004855               | 305.0        | 93.7                             | 0.0000080               |
| 414.7        | 68.9                             | 0.0001347               | 302.7        | 94.4                             | 0.0000249               |
| 407.9        | 70.1                             | 0.0000059               | 300.4        | 95.2                             | 0.0000012               |
| 407.7        | 70.1                             | 0.0000003               |              |                                  |                         |



**5B** – CASSCF/QD-NEVPT2 spin-orbit corrected absorption transitions for the CPCM(THF) phase spectrum (10e,9o Active Space) – 25 triplet roots, 15 singlet roots.

| <i>E</i> /nm | <i>E</i> /kcal mol <sup>-1</sup> | <i>f</i> <sub>osc</sub> | <i>E</i> /nm | <i>E</i> /kcal mol <sup>-1</sup> | <i>f</i> <sub>osc</sub> |
|--------------|----------------------------------|-------------------------|--------------|----------------------------------|-------------------------|
| 777.6        | 36.8                             | 0.0000778               | 406.7        | 70.3                             | 0.0000488               |
| 776.9        | 36.8                             | 0.0000167               | 406.0        | 70.4                             | 0.0006701               |
| 763.5        | 37.4                             | 0.0000307               | 389.7        | 73.4                             | 0.0006836               |
| 685.4        | 41.7                             | 0.0003172               | 380.5        | 75.1                             | 0.1222785               |
| 685.1        | 41.7                             | 0.0000073               | 378.0        | 75.6                             | 0.0006220               |
| 680.7        | 42.0                             | 0.0035585               | 377.5        | 75.7                             | 0.0002213               |
| 674.2        | 42.4                             | 0.0006906               | 377.3        | 75.8                             | 0.0016576               |
| 626.8        | 45.6                             | 0.0000131               | 376.6        | 75.9                             | 0.0004395               |
| 626.2        | 45.7                             | 0.0000234               | 373.7        | 76.5                             | 0.0000126               |
| 624.8        | 45.8                             | 0.0013510               | 373.6        | 76.5                             | 0.0013881               |
| 615.4        | 46.5                             | 0.0020069               | 372.5        | 76.8                             | 0.0053733               |
| 614.6        | 46.5                             | 0.0000535               | 364.7        | 78.4                             | 0.0006193               |
| 613.5        | 46.6                             | 0.0002180               | 353.7        | 80.8                             | 0.0000692               |
| 586.3        | 48.8                             | 0.0684383               | 353.6        | 80.9                             | 0.0002588               |
| 542.6        | 52.7                             | 0.0018515               | 351.7        | 81.3                             | 0.0004618               |
| 541.3        | 52.8                             | 0.0000294               | 346.1        | 82.6                             | 0.0557373               |
| 540.9        | 52.9                             | 0.0000813               | 332.5        | 86.0                             | 0.0000116               |
| 512.5        | 55.8                             | 0.2095695               | 332.4        | 86.0                             | 0.0002597               |
| 472.8        | 60.5                             | 0.0002479               | 331.9        | 86.2                             | 0.0095683               |
| 449.1        | 63.7                             | 0.0016598               | 317.0        | 90.2                             | 0.0000170               |
| 432.6        | 66.1                             | 0.0000006               | 316.3        | 90.4                             | 0.0000687               |
| 432.5        | 66.1                             | 0.0000263               | 313.8        | 91.1                             | 0.0000830               |
| 430.7        | 66.4                             | 0.0006058               | 309.1        | 92.5                             | 0.0000073               |
| 429.4        | 66.6                             | 0.0001960               | 308.7        | 92.6                             | 0.0002560               |
| 423.1        | 67.6                             | 0.0002920               | 308.3        | 92.7                             | 0.0005793               |
| 418.7        | 68.3                             | 0.0021084               | 306.5        | 93.3                             | 0.0001046               |
| 415.2        | 68.9                             | 0.0000006               | 305.3        | 93.6                             | 0.0002346               |
| 415.1        | 68.9                             | 0.0013927               | 305.2        | 93.7                             | 0.0000807               |
| 414.9        | 68.9                             | 0.0000855               | 301.6        | 94.8                             | 0.0003092               |
| 407.0        | 70.3                             | 0.0002981               | 300.7        | 95.1                             | 0.0001700               |

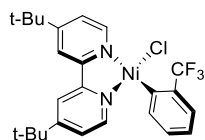

**5B** – TD-DFT (B3LYP) absorption transitions (singlets only) for the CPCM(THF) phase spectrum.

| <i>E</i> /nm | <i>E</i> /kcal mol <sup>-1</sup> | <i>f</i> <sub>osc</sub> | <i>E</i> /nm | <i>E</i> /kcal mol <sup>-1</sup> | <i>f</i> <sub>osc</sub> |
|--------------|----------------------------------|-------------------------|--------------|----------------------------------|-------------------------|
| 740.5        | 38.6                             | 0.0000000               | 363.6        | 78.6                             | 0.0091097               |
| 560.6        | 51.0                             | 0.0000000               | 349.3        | 81.9                             | 0.0001469               |
| 555.3        | 51.5                             | 0.0000000               | 348.0        | 82.2                             | 0.0208281               |
| 520.5        | 54.9                             | 0.0000000               | 345.8        | 82.7                             | 0.0000000               |
| 496.1        | 57.6                             | 0.0043794               | 340.4        | 84.0                             | 0.0000000               |
| 492.5        | 58.1                             | 0.0010825               | 337.4        | 84.7                             | 0.0000000               |
| 485.0        | 59.0                             | 0.0016025               | 322.5        | 88.7                             | 0.0047156               |
| 451.3        | 63.3                             | 0.0236140               | 319.5        | 89.5                             | 0.0000000               |
| 442.5        | 64.6                             | 0.0000000               | 318.7        | 89.7                             | 0.0281766               |
| 440.7        | 64.9                             | 0.0002167               | 317.9        | 89.9                             | 0.0049837               |
| 432.8        | 66.1                             | 0.0001295               | 317.4        | 90.1                             | 0.0000000               |
| 422.7        | 67.6                             | 0.0000000               | 314.3        | 91.0                             | 0.0394408               |
| 419.3        | 68.2                             | 0.0515983               | 308.9        | 92.6                             | 0.0000000               |
| 416.0        | 68.7                             | 0.0029390               | 307.9        | 92.9                             | 0.0000000               |
| 414.1        | 69.0                             | 0.0000000               | 307.8        | 92.9                             | 0.0000000               |
| 413.2        | 69.2                             | 0.0126997               | 307.3        | 93.0                             | 0.0013021               |
| 387.8        | 73.7                             | 0.0003870               | 307.2        | 93.1                             | 0.0102675               |
| 383.8        | 74.5                             | 0.0000000               | 303.8        | 94.1                             | 0.0000000               |
| 380.0        | 75.2                             | 0.0000000               | 303.1        | 94.3                             | 0.0000000               |
| 371.4        | 77.0                             | 0.0000000               |              |                                  |                         |



**5B** – TD-DFT (B3LYP) absorption transitions (singlets only) for the CPCM(Toluene) phase spectrum.

| <i>E</i> /nm | <i>E</i> /kcal mol <sup>-1</sup> | <i>f</i> <sub>osc</sub> | <i>E</i> /nm | <i>E</i> /kcal mol <sup>-1</sup> | <i>f</i> <sub>osc</sub> |
|--------------|----------------------------------|-------------------------|--------------|----------------------------------|-------------------------|
| 726.1        | 39.4                             | 0.0000000               | 363.1        | 78.7                             | 0.0000000               |
| 623.8        | 45.8                             | 0.0000000               | 362.4        | 78.9                             | 0.0000990               |
| 592.8        | 48.2                             | 0.0000000               | 354.5        | 80.6                             | 0.0000000               |
| 592.2        | 48.3                             | 0.0008706               | 353.3        | 80.9                             | 0.0003420               |
| 560.6        | 51.0                             | 0.0000000               | 352.9        | 81.0                             | 0.0000000               |
| 507.7        | 56.3                             | 0.0130239               | 346.0        | 82.6                             | 0.0301789               |
| 499.0        | 57.3                             | 0.0000000               | 344.7        | 82.9                             | 0.0000000               |
| 486.5        | 58.8                             | 0.0000000               | 343.5        | 83.2                             | 0.0047315               |
| 481.0        | 59.4                             | 0.0278899               | 331.0        | 86.4                             | 0.0075129               |
| 477.1        | 59.9                             | 0.0000000               | 328.8        | 87.0                             | 0.0010329               |
| 473.8        | 60.3                             | 0.0000542               | 323.4        | 88.4                             | 0.0203753               |
| 467.4        | 61.2                             | 0.0134871               | 322.2        | 88.7                             | 0.0000000               |
| 442.0        | 64.7                             | 0.0257018               | 321.7        | 88.9                             | 0.0000000               |
| 440.7        | 64.9                             | 0.0069457               | 318.8        | 89.7                             | 0.0000000               |
| 438.3        | 65.2                             | 0.0000293               | 316.9        | 90.2                             | 0.0000000               |
| 432.0        | 66.2                             | 0.0064669               | 312.2        | 91.6                             | 0.0000000               |
| 425.5        | 67.2                             | 0.0005553               | 311.3        | 91.9                             | 0.0193375               |
| 422.7        | 67.6                             | 0.0000000               | 309.8        | 92.3                             | 0.0000000               |
| 421.5        | 67.8                             | 0.0015698               | 307.5        | 93.0                             | 0.0000000               |
| 419.2        | 68.2                             | 0.0000000               | 306.3        | 93.3                             | 0.0000000               |
| 414.4        | 69.0                             | 0.0000000               | 304.5        | 93.9                             | 0.0876530               |
| 383.9        | 74.5                             | 0.0234636               | 302.2        | 94.6                             | 0.0031766               |
| 379.9        | 75.3                             | 0.0000000               | 300.3        | 95.2                             | 0.0000000               |
| 377.2        | 75.8                             | 0.0001594               | 300.0        | 95.3                             | 0.1308097               |
| 373.4        | 76.6                             | 0.0000000               |              |                                  |                         |



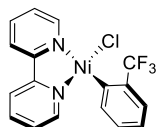

**5C** with Ni–C distance of 1.90 Å (near-equilibrium geometry) – CASSCF/NEVPT2 lowest transition energies with CPCM(THF) (10e,9o Active Space) – 25 triplet roots, 15 singlet roots. Active Space Orbitals (in order for CI vector notation below):  $d(x^2-y^2)/C(sp^2)$ ,  $d(xy)$ ,  $d(xz)$ ,  $d(z^2)$ ,  $d(yz)$ ,  $d(x^2-y^2)/C(sp^2)^*$ ,  $\pi^*(1)$ ,  $\pi^*(2)$ ,  $\pi^*(3)$ .

| State | Root | Multiplicity | $\Delta E/\text{nm}$ | $\Delta E/\text{kcal mol}^{-1}$ | CI vector | Contribution |
|-------|------|--------------|----------------------|---------------------------------|-----------|--------------|
| 0     | 0    | 1            | ---                  | ---                             | 222220000 | 0.5954       |
|       |      |              |                      |                                 | 122221000 | 0.1449       |
| 1     | 0    | 3            | 984.1                | 29.1                            | 221221000 | 0.5231       |
|       |      |              |                      |                                 | 222121000 | 0.1681       |
| 2     | 1    | 3            | 856.4                | 33.4                            | 222121000 | 0.5088       |
|       |      |              |                      |                                 | 221221000 | 0.2458       |
| 3     | 2    | 3            | 779.2                | 36.7                            | 222211000 | 0.6343       |
|       |      |              |                      |                                 | 222121000 | 0.1158       |
| 4     | 3    | 3            | 708.5                | 40.4                            | 221220100 | 0.5655       |
|       |      |              |                      |                                 | 222120100 | 0.1768       |
| 5     | 1    | 1            | 693.7                | 41.2                            | 221220100 | 0.5702       |
|       |      |              |                      |                                 | 222120100 | 0.1683       |
| 6     | 4    | 3            | 650.2                | 44.0                            | 222210100 | 0.3204       |
|       |      |              |                      |                                 | 221220100 | 0.2802       |
| 7     | 2    | 1            | 611.3                | 46.8                            | 222120100 | 0.5807       |
|       |      |              |                      |                                 | 221220100 | 0.1927       |
| 8     | 5    | 3            | 592.6                | 48.2                            | 212221000 | 0.7045       |
|       |      |              |                      |                                 | 112222000 | 0.1096       |
| 9     | 6    | 3            | 567.3                | 50.4                            | 222120100 | 0.4191       |
|       |      |              |                      |                                 | 222210100 | 0.4046       |
| 10    | 3    | 1            | 530.7                | 53.9                            | 222210100 | 0.5772       |
| 11    | 4    | 1            | 459.5                | 62.2                            | 222121000 | 0.4598       |
|       |      |              |                      |                                 | 212220100 | 0.2402       |
| 12    | 5    | 1            | 448.8                | 63.7                            | 221221000 | 0.4763       |
|       |      |              |                      |                                 | 222211000 | 0.1348       |
| 13    | 7    | 3            | 427.8                | 66.8                            | 221220010 | 0.5626       |
|       |      |              |                      |                                 | 222120010 | 0.1745       |
| 14    | 6    | 1            | 426.5                | 67.0                            | 222211000 | 0.6397       |
|       |      |              |                      |                                 | 221221000 | 0.1620       |
| 15    | 7    | 1            | 425.8                | 67.2                            | 221220010 | 0.5623       |
|       |      |              |                      |                                 | 222120010 | 0.1757       |
| 16    | 8    | 1            | 424.3                | 67.4                            | 212221000 | 0.7656       |
| 17    | 8    | 3            | 419.1                | 68.2                            | 212220100 | 0.7253       |
| 18    | 9    | 3            | 408.7                | 70.0                            | 222210010 | 0.2990       |
|       |      |              |                      |                                 | 221220010 | 0.2798       |
|       |      |              |                      |                                 | 222120010 | 0.2608       |
| 19    | 9    | 1            | 407.1                | 70.2                            | 212220100 | 0.5167       |
|       |      |              |                      |                                 | 222121000 | 0.2072       |
| 20    | 10   | 1            | 393.4                | 72.7                            | 222120010 | 0.2928       |
|       |      |              |                      |                                 | 221220010 | 0.2660       |

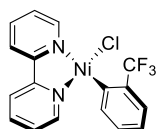

**5C** with Ni–C distance of 1.90 Å (near-equilibrium geometry) – CASSCF/QD-NEVPT2 lowest transition energies with CPCM(THF) (10e,9o Active Space) – 25 triplet roots, 15 singlet roots. Active Space Orbitals (in order for CI vector notation below):  $d(x^2-y^2)/C(sp^2)$ ,  $d(xy)$ ,  $d(xz)$ ,  $d(z^2)$ ,  $d(yz)$ ,  $d(x^2-y^2)/C(sp^2)^*$ ,  $\pi^*(1)$ ,  $\pi^*(2)$ ,  $\pi^*(3)$ .

| State | Root | Multiplicity | $\Delta E/\text{nm}$ | $\Delta E/\text{kcal mol}^{-1}$ | CI vector | Contribution |
|-------|------|--------------|----------------------|---------------------------------|-----------|--------------|
| 0     | 0    | 1            | ---                  | ---                             | 222220000 | 0.5758       |
|       |      |              |                      |                                 | 122221000 | 0.1265       |
| 1     | 0    | 3            | 970.2                | 29.5                            | 221221000 | 0.5109       |
|       |      |              |                      |                                 | 222121000 | 0.1655       |
| 2     | 1    | 3            | 856.7                | 33.4                            | 222121000 | 0.5286       |
|       |      |              |                      |                                 | 221221000 | 0.2274       |
| 3     | 2    | 3            | 770.4                | 37.1                            | 222211000 | 0.6433       |
|       |      |              |                      |                                 | 122212000 | 0.1145       |
| 4     | 3    | 3            | 696.2                | 41.1                            | 221220100 | 0.5345       |
|       |      |              |                      |                                 | 222120100 | 0.1839       |
| 5     | 1    | 1            | 682.6                | 41.9                            | 221220100 | 0.5684       |
|       |      |              |                      |                                 | 222120100 | 0.1662       |
| 6     | 4    | 3            | 641.7                | 44.6                            | 221220100 | 0.2656       |
|       |      |              |                      |                                 | 222120100 | 0.2568       |
| 7     | 5    | 3            | 619.2                | 46.2                            | 212221000 | 0.6759       |
| 8     | 2    | 1            | 607.3                | 47.1                            | 222120100 | 0.6033       |
|       |      |              |                      |                                 | 221220100 | 0.1904       |
| 9     | 6    | 3            | 559.0                | 51.2                            | 222210100 | 0.4057       |
|       |      |              |                      |                                 | 222120100 | 0.3934       |
| 10    | 3    | 1            | 531.4                | 53.8                            | 222210100 | 0.5523       |
| 11    | 4    | 1            | 481.7                | 59.4                            | 212220100 | 0.6250       |
|       |      |              |                      |                                 | 222121000 | 0.1072       |
| 12    | 5    | 1            | 448.1                | 63.8                            | 221221000 | 0.4282       |
|       |      |              |                      |                                 | 222121000 | 0.1171       |
| 13    | 7    | 3            | 433.0                | 66.0                            | 212220100 | 0.7584       |
| 14    | 8    | 3            | 425.6                | 67.2                            | 221220010 | 0.5031       |
|       |      |              |                      |                                 | 222120010 | 0.1632       |
| 15    | 6    | 1            | 424.9                | 67.3                            | 222211000 | 0.3459       |
|       |      |              |                      |                                 | 221220010 | 0.1307       |
| 16    | 7    | 1            | 422.0                | 67.8                            | 221220010 | 0.3763       |
|       |      |              |                      |                                 | 222211000 | 0.2062       |
| 17    | 8    | 1            | 420.5                | 68.0                            | 212221000 | 0.5511       |
|       |      |              |                      |                                 | 222120010 | 0.1387       |
| 18    | 9    | 3            | 405.4                | 70.5                            | 222210010 | 0.2950       |
|       |      |              |                      |                                 | 221220010 | 0.2925       |
|       |      |              |                      |                                 | 222120010 | 0.2353       |
| 19    | 9    | 1            | 389.8                | 73.4                            | 222120010 | 0.1923       |
|       |      |              |                      |                                 | 221220010 | 0.1770       |
| 20    | 10   | 3            | 387.8                | 73.7                            | 221220001 | 0.5007       |
|       |      |              |                      |                                 | 222120001 | 0.1586       |

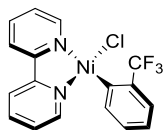

**5C** with Ni–C distance of 3.50 Å (dissociation limit) – CASSCF/NEVPT2 lowest transition energies with CPCM(THF) (10e,8o Active Space) – 25 triplet roots, 15 singlet roots. Active Space Orbitals (in order for CI vector notation below):  $d(xy)$ ,  $d(x^2-y^2)/C(sp^2)$ ,  $d(yz)$ ,  $d(z^2)$ ,  $d(xz)$ ,  $d(x^2-y^2)/C(sp^2)^*$ ,  $\pi^*(1)$ ,  $\pi^*(2)$ .

| State | Root | Multiplicity | $\Delta E/\text{nm}$ | $\Delta E/\text{kcal mol}^{-1}$ | CI vector            | Contribution     |
|-------|------|--------------|----------------------|---------------------------------|----------------------|------------------|
| 0     | 0    | 1            | ---                  | ---                             | 22211110             | 0.8430           |
| 1     | 0    | 3            | 433933.0             | 0.1                             | 22211110             | 0.7178           |
| 2     | 1    | 3            | 22467.1              | 1.3                             | 22121110             | 0.7274           |
| 3     | 1    | 1            | 8013.3               | 3.6                             | 22121110             | 0.9019           |
| 4     | 2    | 3            | 7762.1               | 3.7                             | 22121110             | 0.8874           |
| 5     | 3    | 3            | 5916.6               | 4.8                             | 22211110             | 0.8099           |
| 6     | 4    | 3            | 4294.4               | 6.7                             | 21221110             | 0.7569           |
| 7     | 5    | 3            | 3567.4               | 8.0                             | 21221110             | 0.8551           |
| 8     | 2    | 1            | 3540.3               | 8.1                             | 21221110             | 0.8559           |
| 9     | 6    | 3            | 1591.3               | 18.0                            | 21212110<br>12221110 | 0.4451<br>0.4050 |
| 10    | 3    | 1            | 1546.0               | 18.5                            | 21212110<br>12221110 | 0.4928<br>0.4423 |
| 11    | 7    | 3            | 1432.3               | 20.0                            | 21212110<br>12221110 | 0.4592<br>0.4503 |
| 12    | 8    | 3            | 1154.3               | 24.8                            | 12212110             | 0.7728           |
| 13    | 4    | 1            | 1132.7               | 25.2                            | 12212110             | 0.8380           |
| 14    | 9    | 3            | 1127.2               | 25.4                            | 22211101             | 0.8163           |
| 15    | 5    | 1            | 1122.1               | 25.5                            | 22211101             | 0.8120           |
| 16    | 10   | 3            | 1111.0               | 25.7                            | 22121101             | 0.8788           |
| 17    | 6    | 1            | 1106.9               | 25.8                            | 22220110             | 0.7119           |
| 18    | 7    | 1            | 1105.1               | 25.9                            | 22121101             | 0.8794           |
| 19    | 11   | 3            | 1083.9               | 26.4                            | 22121101             | 0.8959           |
| 20    | 12   | 3            | 1059.3               | 27.0                            | 22220110             | 0.8218           |

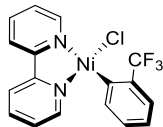

**5C** with Ni–C distance of 3.50 Å (dissociation limit) – CASSCF/QD-NEVPT2 lowest transition energies with CPCM(THF) (10e,8o Active Space) – 25 triplet roots, 15 singlet roots. Active Space Orbitals (in order for CI vector notation below):  $d(xy)$ ,  $d(x^2-y^2)/C(sp^2)$ ,  $d(yz)$ ,  $d(z^2)$ ,  $d(xz)$ ,  $d(x^2-y^2)/C(sp^2)^*$ ,  $\pi^*(1)$ ,  $\pi^*(2)$ .

| State | Root | Multiplicity | $\Delta E/\text{nm}$ | $\Delta E/\text{kcal mol}^{-1}$ | CI vector | Contribution |
|-------|------|--------------|----------------------|---------------------------------|-----------|--------------|
| 1     | 0    | 1            | ---                  | ---                             | 22211110  | 0.7077       |
| 2     | 0    | 3            | 1.4                  | 20911.8                         | 22211110  | 0.7827       |
| 3     | 1    | 3            | 3.8                  | 7623.7                          | 22121110  | 0.8933       |
| 4     | 1    | 1            | 4.7                  | 6047.8                          | 22121110  | 0.8955       |
| 5     | 2    | 3            | 5.8                  | 4902.2                          | 22121110  | 0.9739       |
| 6     | 3    | 3            | 6.4                  | 4450.2                          | 22211110  | 0.8018       |
| 7     | 4    | 3            | 8.7                  | 3298.5                          | 21221110  | 0.8341       |
| 8     | 2    | 1            | 9.0                  | 3169.8                          | 21221110  | 0.7906       |
| 9     | 5    | 3            | 10.2                 | 2809.9                          | 21221110  | 0.8723       |
| 10    | 3    | 1            | 21.9                 | 1305.5                          | 21212110  | 0.4541       |
|       |      |              |                      |                                 | 12221110  | 0.4319       |
| 11    | 6    | 3            | 22.5                 | 1273.3                          | 21212110  | 0.4717       |
|       |      |              |                      |                                 | 12221110  | 0.4631       |
| 12    | 7    | 3            | 23.7                 | 1207.2                          | 22220110  | 0.5383       |
|       |      |              |                      |                                 | 12221110  | 0.1650       |
|       |      |              |                      |                                 | 21212110  | 0.1506       |
| 13    | 4    | 1            | 24.1                 | 1188.4                          | 22220110  | 0.7941       |
| 14    | 8    | 3            | 24.3                 | 1177.3                          | 12221110  | 0.3182       |
|       |      |              |                      |                                 | 21212110  | 0.2977       |
|       |      |              |                      |                                 | 22220110  | 0.2786       |
| 15    | 5    | 1            | 26.0                 | 1100.8                          | 22211101  | 0.6807       |
| 16    | 9    | 3            | 26.7                 | 1072.2                          | 22121101  | 0.7818       |
| 17    | 6    | 1            | 26.9                 | 1061.1                          | 22121101  | 0.8146       |
| 18    | 10   | 3            | 27.0                 | 1059.1                          | 22211101  | 0.6835       |
|       |      |              |                      |                                 | 22121101  | 0.1395       |
| 19    | 11   | 3            | 28.2                 | 1012.7                          | 22121101  | 0.9312       |
| 20    | 12   | 3            | 28.9                 | 988.9                           | 22211101  | 0.8022       |

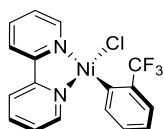

**5C** with Ni–C distance of 1.90 Å (near-equilibrium geometry) – CASSCF/NEVPT2 composition of the singlet ground state with CPCM(THF) (10e,9o Active Space) – 25 triplet roots, 15 singlet roots. Active Space Orbitals (in order for CI vector notation below):  $d(x^2-y^2)/C(sp^2)$ ,  $d(xy)$ ,  $d(xz)$ ,  $d(z^2)$ ,  $d(yz)$ ,  $d(x^2-y^2)/C(sp^2)^*$ ,  $\pi^*(1)$ ,  $\pi^*(2)$ ,  $\pi^*(3)$ .

| CI vector                      | Transition                                                                       | Contribution |
|--------------------------------|----------------------------------------------------------------------------------|--------------|
| 222220000                      | Closed-shell singlet (CSS) $d^8$                                                 | 0.5954       |
| 122221000                      | $d(x^2-y^2)/C(sp^2) \rightarrow d(x^2-y^2)/C(sp^2)^*$                            | 0.1449       |
| 222210100                      | $d(yz) \rightarrow \pi^*(1)$                                                     | 0.1178       |
| 221220100                      | $d(xz) \rightarrow \pi^*(1)$                                                     | 0.0347       |
| 022212100                      | $2x[d(x^2-y^2)/C(sp^2)] + d(yz) \rightarrow 2x[d(x^2-y^2)/C(sp^2)^*] + \pi^*(1)$ | 0.0132       |
| 220222000                      | $2x[d(xz)] \rightarrow 2x[d(x^2-y^2)/C(sp^2)^*]$                                 | 0.0122       |
| 222120001                      | $d(z^2) \rightarrow \pi^*(3)$                                                    | 0.0117       |
| <b>Sum of CSS</b>              |                                                                                  | <b>60 %</b>  |
| <b>Sum of all MLCT</b>         |                                                                                  | <b>16 %</b>  |
| <b>Sum of all d-d</b>          |                                                                                  | <b>16 %</b>  |
| <b>Sum of mixed MLCT + d-d</b> |                                                                                  | <b>1 %</b>   |

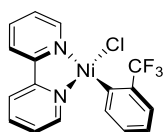

**5C** with Ni–C distance of 1.90 Å (near-equilibrium geometry) – CASSCF/QD-NEVPT2 composition of the singlet ground state with CPCM(THF) (10e,9o Active Space) – 25 triplet roots, 15 singlet roots. Active Space Orbitals (in order for CI vector notation below):  $d(x^2-y^2)/C(sp^2)$ ,  $d(xy)$ ,  $d(xz)$ ,  $d(z^2)$ ,  $d(yz)$ ,  $d(x^2-y^2)/C(sp^2)^*$ ,  $\pi^*(1)$ ,  $\pi^*(2)$ ,  $\pi^*(3)$ .

| CI vector                      | Transition                                                                       | Contribution |
|--------------------------------|----------------------------------------------------------------------------------|--------------|
| 222220000                      | Closed-shell singlet (CSS) $d^8$                                                 | 0.5758       |
| 122221000                      | $d(x^2-y^2)/C(sp^2) \rightarrow d(x^2-y^2)/C(sp^2)^*$                            | 0.1265       |
| 222210100                      | $d(yz) \rightarrow \pi^*(1)$                                                     | 0.1218       |
| 221220100                      | $d(xz) \rightarrow \pi^*(1)$                                                     | 0.0340       |
| 222120001                      | $d(z^2) \rightarrow \pi^*(3)$                                                    | 0.0267       |
| 222210010                      | $d(yz) \rightarrow \pi^*(2)$                                                     | 0.0148       |
| 022212100                      | $2x[d(x^2-y^2)/C(sp^2)] + d(yz) \rightarrow 2x[d(x^2-y^2)/C(sp^2)^*] + \pi^*(1)$ | 0.0135       |
| <b>Sum of CSS</b>              |                                                                                  | <b>58 %</b>  |
| <b>Sum of all MLCT</b>         |                                                                                  | <b>20 %</b>  |
| <b>Sum of all d-d</b>          |                                                                                  | <b>13 %</b>  |
| <b>Sum of mixed MLCT + d-d</b> |                                                                                  | <b>1 %</b>   |

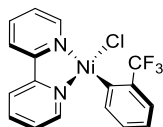

**5C** with Ni–C distance of 3.50 Å (dissociation limit) – CASSCF/NEVPT2 composition of the singlet ground state with CPCM(THF) (10e,8o Active Space) – 25 triplet roots, 15 singlet roots. Active Space Orbitals (in order for CI vector notation below):  $d(xy)$ ,  $d(x^2-y^2)/C(sp^2)$ ,  $d(yz)$ ,  $d(z^2)$ ,  $d(xz)$ ,  $d(x^2-y^2)/C(sp^2)^*$ ,  $\pi^*(1)$ ,  $\pi^*(2)$ .

| CI vector                      | Transition                                                               | Contribution |
|--------------------------------|--------------------------------------------------------------------------|--------------|
| 22211110                       | $d(z^2) + d(xz) \rightarrow d(x^2-y^2)/C(sp^2)^* + \pi^*(1)$             | 0.8430       |
| 11222110                       | $d(xy) + d(x^2-y^2)/C(sp^2) \rightarrow d(x^2-y^2)/C(sp^2)^* + \pi^*(1)$ | 0.0497       |
| 22221100                       | $d(xz) \rightarrow d(x^2-y^2)/C(sp^2)^*$                                 | 0.0411       |
| 22112110                       | $d(yz) + d(z^2) \rightarrow d(x^2-y^2)/C(sp^2)^* + \pi^*(1)$             | 0.0284       |
| 21122110                       | $d(x^2-y^2)/C(sp^2) + d(yz) \rightarrow d(x^2-y^2)/C(sp^2)^* + \pi^*(1)$ | 0.0143       |
| <b>Sum of CSS</b>              |                                                                          | <b>0 %</b>   |
| <b>Sum of all MLCT</b>         |                                                                          | <b>0 %</b>   |
| <b>Sum of all d-d</b>          |                                                                          | <b>4 %</b>   |
| <b>Sum of mixed MLCT + d-d</b> |                                                                          | <b>94 %</b>  |

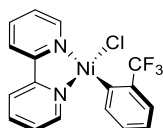

**5C** with Ni–C distance of 3.50 Å (dissociation limit) – CASSCF/QD-NEVPT2 composition of the singlet ground state with CPCM(THF) (10e,8o Active Space) – 25 triplet roots, 15 singlet roots. Active Space Orbitals (in order for CI vector notation below):  $d(xy)$ ,  $d(x^2-y^2)/C(sp^2)$ ,  $d(yz)$ ,  $d(z^2)$ ,  $d(xz)$ ,  $d(x^2-y^2)/C(sp^2)^*$ ,  $\pi^*(1)$ ,  $\pi^*(2)$ .

| CI vector                      | Transition                                                               | Contribution |
|--------------------------------|--------------------------------------------------------------------------|--------------|
| 22211110                       | $d(z^2) + d(xz) \rightarrow d(x^2-y^2)/C(sp^2)^* + \pi^*(1)$             | 0.7077       |
| 22112110                       | $d(yz) + d(z^2) \rightarrow d(x^2-y^2)/C(sp^2)^* + \pi^*(1)$             | 0.0599       |
| 22212010                       | $d(z^2) \rightarrow \pi^*(1)$                                            | 0.0533       |
| 22221100                       | $d(xz) \rightarrow d(x^2-y^2)/C(sp^2)^*$                                 | 0.0488       |
| 21221110                       | $d(x^2-y^2)/C(sp^2) + d(xz) \rightarrow d(x^2-y^2)/C(sp^2)^* + \pi^*(1)$ | 0.0364       |
| 11222110                       | $d(xy) + d(x^2-y^2)/C(sp^2) \rightarrow d(x^2-y^2)/C(sp^2)^* + \pi^*(1)$ | 0.0243       |
| 22210210                       | $d(yz) + 2x[d(xz)] \rightarrow 2x[d(x^2-y^2)/C(sp^2)^*] + \pi^*(1)$      | 0.0241       |
| 22211101                       | $d(z^2) + d(xz) \rightarrow d(x^2-y^2)/C(sp^2)^* + \pi^*(2)$             | 0.0145       |
| <b>Sum of CSS</b>              |                                                                          | <b>0 %</b>   |
| <b>Sum of all MLCT</b>         |                                                                          | <b>5 %</b>   |
| <b>Sum of all d-d</b>          |                                                                          | <b>5 %</b>   |
| <b>Sum of mixed MLCT + d-d</b> |                                                                          | <b>87 %</b>  |



**5C** – CASSCF/NEVPT2 spin-orbit corrected absorption transitions for the CPCM(THF) phase spectrum (10e,9o Active Space) – 25 triplet roots, 15 singlet roots.

| <i>E</i> /nm | <i>E</i> /kcal mol <sup>-1</sup> | <i>f</i> <sub>osc</sub> | <i>E</i> /nm | <i>E</i> /kcal mol <sup>-1</sup> | <i>f</i> <sub>osc</sub> |
|--------------|----------------------------------|-------------------------|--------------|----------------------------------|-------------------------|
| 771.2        | 37.1                             | 0.0000025               | 405.1        | 70.6                             | 0.0000553               |
| 769.6        | 37.2                             | 0.0000090               | 392.3        | 72.9                             | 0.0942350               |
| 755.5        | 37.8                             | 0.0000619               | 386.4        | 74.0                             | 0.0003623               |
| 718.6        | 39.8                             | 0.0002211               | 364.8        | 78.4                             | 0.0024644               |
| 718.3        | 39.8                             | 0.0000018               | 364.2        | 78.5                             | 0.0000104               |
| 712.7        | 40.1                             | 0.0032726               | 364.0        | 78.6                             | 0.0047577               |
| 705.8        | 40.5                             | 0.0005742               | 363.7        | 78.6                             | 0.0003078               |
| 645.1        | 44.3                             | 0.0014162               | 363.5        | 78.7                             | 0.0005484               |
| 644.4        | 44.4                             | 0.0000045               | 363.3        | 78.7                             | 0.0056258               |
| 643.1        | 44.5                             | 0.0001086               | 362.2        | 78.9                             | 0.0947149               |
| 608.2        | 47.0                             | 0.0656460               | 361.4        | 79.1                             | 0.0001273               |
| 589.9        | 48.5                             | 0.0000191               | 346.2        | 82.6                             | 0.0000019               |
| 589.4        | 48.5                             | 0.0000078               | 346.1        | 82.6                             | 0.0000110               |
| 587.6        | 48.7                             | 0.0008252               | 341.0        | 83.8                             | 0.0362738               |
| 561.0        | 51.0                             | 0.0013321               | 339.4        | 84.2                             | 0.0001071               |
| 560.2        | 51.0                             | 0.0000112               | 335.0        | 85.3                             | 0.0000078               |
| 559.8        | 51.1                             | 0.0000419               | 334.5        | 85.5                             | 0.0048052               |
| 525.4        | 54.4                             | 0.2370075               | 327.3        | 87.4                             | 0.1734043               |
| 458.0        | 62.4                             | 0.0001610               | 317.6        | 90.0                             | 0.0000446               |
| 447.4        | 63.9                             | 0.0019124               | 317.0        | 90.2                             | 0.0032582               |
| 431.7        | 66.2                             | 0.0000203               | 315.0        | 90.8                             | 0.0002640               |
| 431.7        | 66.2                             | 0.0000020               | 314.3        | 91.0                             | 0.0000315               |
| 429.9        | 66.5                             | 0.0051154               | 311.5        | 91.8                             | 0.0073473               |
| 429.9        | 66.5                             | 0.0008695               | 311.3        | 91.8                             | 0.0004756               |
| 426.8        | 67.0                             | 0.0005686               | 309.7        | 92.3                             | 0.0000095               |
| 423.7        | 67.5                             | 0.0006059               | 307.3        | 93.0                             | 0.0003671               |
| 417.3        | 68.5                             | 0.0008650               | 307.2        | 93.1                             | 0.0000249               |
| 416.6        | 68.6                             | 0.0001637               | 307.2        | 93.1                             | 0.0000262               |
| 416.6        | 68.6                             | 0.0000785               | 306.8        | 93.2                             | 0.0006461               |
| 406.2        | 70.4                             | 0.0002483               | 305.3        | 93.7                             | 0.0002974               |
| 405.5        | 70.5                             | 0.0001825               | 302.4        | 94.5                             | 0.0001211               |
| 405.3        | 70.6                             | 0.0000480               | 301.1        | 95.0                             | 0.0000152               |



**5C** – CASSCF/QD-NEVPT2 spin-orbit corrected absorption transitions for the CPCM(THF) phase spectrum (10e,9o Active Space) – 25 triplet roots, 15 singlet roots.

| <i>E</i> /nm | <i>E</i> /kcal mol <sup>-1</sup> | <i>f</i> <sub>osc</sub> | <i>E</i> /nm | <i>E</i> /kcal mol <sup>-1</sup> | <i>f</i> <sub>osc</sub> |
|--------------|----------------------------------|-------------------------|--------------|----------------------------------|-------------------------|
| 763.4        | 37.5                             | 0.0000045               | 402.7        | 71.0                             | 0.0000200               |
| 763.0        | 37.5                             | 0.0000080               | 402.2        | 71.1                             | 0.0001142               |
| 750.5        | 38.1                             | 0.0000678               | 390.8        | 73.2                             | 0.0017081               |
| 705.9        | 40.5                             | 0.0002985               | 389.7        | 73.4                             | 0.0000092               |
| 705.5        | 40.5                             | 0.0000002               | 389.6        | 73.4                             | 0.0010704               |
| 700.8        | 40.8                             | 0.0036045               | 387.6        | 73.8                             | 0.0018656               |
| 693.6        | 41.2                             | 0.0007913               | 382.2        | 74.8                             | 0.0959134               |
| 636.7        | 44.9                             | 0.0022416               | 380.0        | 75.2                             | 0.0106898               |
| 636.2        | 44.9                             | 0.0000008               | 369.0        | 77.5                             | 0.0000029               |
| 635.2        | 45.0                             | 0.0000994               | 368.9        | 77.5                             | 0.0000196               |
| 616.1        | 46.4                             | 0.0000188               | 368.5        | 77.6                             | 0.0013688               |
| 615.7        | 46.4                             | 0.0006190               | 361.9        | 79.0                             | 0.0006556               |
| 614.5        | 46.5                             | 0.0007662               | 359.4        | 79.6                             | 0.0000410               |
| 601.2        | 47.6                             | 0.0646565               | 359.2        | 79.6                             | 0.0088950               |
| 553.8        | 51.6                             | 0.0040293               | 358.9        | 79.7                             | 0.0009258               |
| 552.4        | 51.8                             | 0.0000021               | 349.8        | 81.7                             | 0.0882684               |
| 551.8        | 51.8                             | 0.0000678               | 335.1        | 85.3                             | 0.0000039               |
| 526.4        | 54.3                             | 0.2325002               | 334.9        | 85.4                             | 0.0089677               |
| 478.9        | 59.7                             | 0.0001625               | 334.9        | 85.4                             | 0.0009882               |
| 447.2        | 63.9                             | 0.0019357               | 318.2        | 89.9                             | 0.2236957               |
| 431.2        | 66.3                             | 0.0001980               | 314.5        | 90.9                             | 0.0004537               |
| 431.2        | 66.3                             | 0.0003570               | 313.8        | 91.1                             | 0.0006551               |
| 431.2        | 66.3                             | 0.0005773               | 311.3        | 91.8                             | 0.0000737               |
| 429.1        | 66.6                             | 0.0000083               | 306.3        | 93.3                             | 0.0000052               |
| 429.1        | 66.6                             | 0.0001184               | 305.9        | 93.5                             | 0.0000708               |
| 427.6        | 66.9                             | 0.0009475               | 305.7        | 93.5                             | 0.0000159               |
| 426.9        | 67.0                             | 0.0003153               | 304.5        | 93.9                             | 0.0009223               |
| 422.6        | 67.7                             | 0.0004073               | 302.6        | 94.5                             | 0.0000601               |
| 418.6        | 68.3                             | 0.0002422               | 300.2        | 95.2                             | 0.0022000               |
| 402.7        | 71.0                             | 0.0000927               |              |                                  |                         |





5C – TD-DFT (B3LYP) absorption transitions (singlets only) for the CPCM(THF) phase spectrum.

| <i>E</i> /nm | <i>E</i> /kcal mol <sup>-1</sup> | <i>f</i> <sub>osc</sub> | <i>E</i> /nm | <i>E</i> /kcal mol <sup>-1</sup> | <i>f</i> <sub>osc</sub> |
|--------------|----------------------------------|-------------------------|--------------|----------------------------------|-------------------------|
| 730.2        | 39.2                             | 0.0000000               | 360.9        | 79.2                             | 0.0000000               |
| 580.2        | 49.3                             | 0.0000000               | 358.7        | 79.7                             | 0.0000060               |
| 561.8        | 50.9                             | 0.0000000               | 357.1        | 80.1                             | 0.0070012               |
| 546.3        | 52.3                             | 0.0000000               | 352.5        | 81.1                             | 0.0000000               |
| 518.0        | 55.2                             | 0.0023225               | 348.9        | 81.9                             | 0.0000000               |
| 499.2        | 57.3                             | 0.0053683               | 336.5        | 85.0                             | 0.0000000               |
| 474.3        | 60.3                             | 0.0000890               | 334.1        | 85.6                             | 0.0065927               |
| 453.8        | 63.0                             | 0.0000000               | 325.1        | 87.9                             | 0.0265813               |
| 448.4        | 63.8                             | 0.0170550               | 321.5        | 88.9                             | 0.0000000               |
| 445.4        | 64.2                             | 0.0000000               | 319.6        | 89.5                             | 0.0205561               |
| 438.1        | 65.3                             | 0.0008455               | 319.2        | 89.6                             | 0.0091146               |
| 436.4        | 65.5                             | 0.0304925               | 317.5        | 90.1                             | 0.0119539               |
| 436.1        | 65.6                             | 0.0010648               | 315.2        | 90.7                             | 0.0000000               |
| 430.6        | 66.4                             | 0.0062312               | 312.5        | 91.5                             | 0.0000000               |
| 428.1        | 66.8                             | 0.0193447               | 312.0        | 91.6                             | 0.0000000               |
| 410.5        | 69.7                             | 0.0000000               | 311.9        | 91.7                             | 0.0000000               |
| 401.8        | 71.2                             | 0.0000000               | 310.3        | 92.1                             | 0.0336837               |
| 395.2        | 72.3                             | 0.0035365               | 309.2        | 92.5                             | 0.0000000               |
| 389.0        | 73.5                             | 0.0002908               | 303.7        | 94.2                             | 0.0000000               |
| 387.5        | 73.8                             | 0.0000000               | 302.3        | 94.6                             | 0.0141345               |
| 372.8        | 76.7                             | 0.0000000               | 300.1        | 95.3                             | 0.0037223               |



5C – TD-DFT (B3LYP) absorption transitions (singlets only) for the CPCM(Toluene) phase spectrum.

| <i>E</i> /nm | <i>E</i> /kcal mol <sup>-1</sup> | <i>f</i> <sub>osc</sub> | <i>E</i> /nm | <i>E</i> /kcal mol <sup>-1</sup> | <i>f</i> <sub>osc</sub> |
|--------------|----------------------------------|-------------------------|--------------|----------------------------------|-------------------------|
| 714.7        | 40.0                             | 0.0000000               | 383.4        | 74.6                             | 0.0000000               |
| 657.3        | 43.5                             | 0.0000000               | 381.7        | 74.9                             | 0.0000000               |
| 632.0        | 45.2                             | 0.0007808               | 367.1        | 77.9                             | 0.0000000               |
| 631.0        | 45.3                             | 0.0000000               | 357.4        | 80.0                             | 0.0274102               |
| 561.7        | 50.9                             | 0.0000000               | 352.2        | 81.2                             | 0.0000000               |
| 537.7        | 53.2                             | 0.0000000               | 351.4        | 81.4                             | 0.0000000               |
| 525.4        | 54.4                             | 0.0154291               | 346.8        | 82.4                             | 0.0017050               |
| 520.0        | 55.0                             | 0.0085450               | 345.5        | 82.7                             | 0.0012754               |
| 508.3        | 56.2                             | 0.0000000               | 345.4        | 82.8                             | 0.0000000               |
| 502.5        | 56.9                             | 0.0000000               | 345.3        | 82.8                             | 0.0000000               |
| 473.8        | 60.4                             | 0.0000291               | 345.1        | 82.9                             | 0.0054869               |
| 465.5        | 61.4                             | 0.0093342               | 344.9        | 82.9                             | 0.0071996               |
| 460.7        | 62.1                             | 0.0074491               | 335.4        | 85.2                             | 0.0190400               |
| 451.0        | 63.4                             | 0.0011631               | 333.9        | 85.6                             | 0.0000000               |
| 446.1        | 64.1                             | 0.0000000               | 331.2        | 86.3                             | 0.0008952               |
| 445.6        | 64.2                             | 0.0378068               | 330.3        | 86.6                             | 0.0253975               |
| 438.5        | 65.2                             | 0.0008962               | 329.7        | 86.7                             | 0.0000000               |
| 432.6        | 66.1                             | 0.0029823               | 319.0        | 89.6                             | 0.0000000               |
| 428.2        | 66.8                             | 0.0003323               | 316.7        | 90.3                             | 0.0000000               |
| 426.4        | 67.1                             | 0.0000000               | 309.5        | 92.4                             | 0.0000000               |
| 424.2        | 67.4                             | 0.0000000               | 308.8        | 92.6                             | 0.0000000               |
| 398.2        | 71.8                             | 0.0077311               | 307.3        | 93.0                             | 0.0000000               |
| 389.7        | 73.4                             | 0.0000838               | 304.9        | 93.8                             | 0.0037630               |
| 386.1        | 74.1                             | 0.0000000               | 302.6        | 94.5                             | 0.0798152               |
| 383.6        | 74.5                             | 0.0012814               | 302.4        | 94.6                             | 0.0060800               |

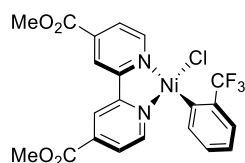

**5D** with Ni–C distance of 1.90 Å (near-equilibrium geometry) – CASSCF/NEVPT2 lowest transition energies with CPCM(THF) (10e,9o Active Space) – 25 triplet roots, 15 singlet roots. Active Space Orbitals (in order for CI vector notation below):  $d(xy)$ ,  $d(x^2-y^2)/C(sp^2)$ ,  $d(yz)$ ,  $d(xz)$ ,  $d(z^2)$ ,  $d(x^2-y^2)/C(sp^2)^*$ ,  $\pi^*(1)$ ,  $\pi^*(2)$ ,  $\pi^*(3)$ .

| State | Root | Multiplicity | $\Delta E/\text{nm}$ | $\Delta E/\text{kcal mol}^{-1}$ | CI vector | Contribution |
|-------|------|--------------|----------------------|---------------------------------|-----------|--------------|
| 0     | 0    | 1            | ---                  | ---                             | 222220000 | 0.4852       |
|       |      |              |                      |                                 | 222120100 | 0.2865       |
| 1     | 0    | 3            | 983.4                | 29.1                            | 222211000 | 0.7552       |
|       |      |              |                      |                                 | 212212000 | 0.1022       |
| 2     | 1    | 3            | 846.3                | 33.8                            | 222210100 | 0.7611       |
| 3     | 2    | 3            | 846.1                | 33.8                            | 221221000 | 0.4009       |
|       |      |              |                      |                                 | 222121000 | 0.3605       |
| 4     | 1    | 1            | 828.0                | 34.5                            | 222210100 | 0.8191       |
| 5     | 3    | 3            | 775.0                | 36.9                            | 222121000 | 0.4015       |
|       |      |              |                      |                                 | 221221000 | 0.3434       |
| 6     | 4    | 3            | 763.1                | 37.5                            | 222120100 | 0.7477       |
| 7     | 2    | 1            | 697.6                | 41.0                            | 221220100 | 0.6280       |
|       |      |              |                      |                                 | 222120100 | 0.1395       |
| 8     | 5    | 3            | 648.2                | 44.1                            | 221220100 | 0.7298       |
| 9     | 3    | 1            | 631.3                | 45.3                            | 222120100 | 0.3667       |
|       |      |              |                      |                                 | 221220100 | 0.1552       |
|       |      |              |                      |                                 | 222220000 | 0.1511       |
| 10    | 6    | 3            | 595.6                | 48.0                            | 122221000 | 0.4831       |
|       |      |              |                      |                                 | 212221000 | 0.2074       |
|       |      |              |                      |                                 | 221122000 | 0.1218       |
| 11    | 7    | 3            | 490.8                | 58.3                            | 222210010 | 0.8110       |
| 12    | 4    | 1            | 490.2                | 58.3                            | 122220100 | 0.4638       |
|       |      |              |                      |                                 | 212220100 | 0.1889       |
|       |      |              |                      |                                 | 221121100 | 0.1012       |
| 13    | 5    | 1            | 489.9                | 58.4                            | 222210010 | 0.8063       |
| 14    | 8    | 3            | 475.7                | 60.1                            | 122220100 | 0.5435       |
|       |      |              |                      |                                 | 212220100 | 0.2219       |
| 15    | 9    | 3            | 463.7                | 61.7                            | 222120010 | 0.7497       |
| 16    | 6    | 1            | 458.7                | 62.3                            | 222211000 | 0.4023       |
|       |      |              |                      |                                 | 222120010 | 0.2317       |
|       |      |              |                      |                                 | 122221000 | 0.1210       |
| 17    | 10   | 3            | 458.6                | 62.3                            | 222210001 | 0.8081       |
| 18    | 7    | 1            | 457.7                | 62.5                            | 222210001 | 0.7743       |
| 19    | 8    | 1            | 438.4                | 65.2                            | 222121000 | 0.5914       |
| 20    | 11   | 3            | 431.8                | 66.2                            | 222120001 | 0.7548       |

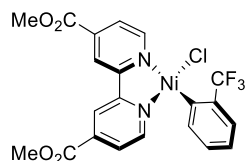

**5D** with Ni–C distance of 1.90 Å (near-equilibrium geometry) – CASSCF/QD-NEVPT2 lowest transition energies with CPCM(THF) (10e,9o Active Space) – 25 triplet roots, 15 singlet roots. Active Space Orbitals (in order for CI vector notation below):  $d(xy)$ ,  $d(x^2-y^2)/C(sp^2)$ ,  $d(yz)$ ,  $d(xz)$ ,  $d(z^2)$ ,  $d(x^2-y^2)/C(sp^2)^*$ ,  $\pi^*(1)$ ,  $\pi^*(2)$ ,  $\pi^*(3)$ .

| State | Root | Multiplicity | $\Delta E/\text{nm}$ | $\Delta E/\text{kcal mol}^{-1}$ | CI vector | Contribution |
|-------|------|--------------|----------------------|---------------------------------|-----------|--------------|
| 0     | 0    | 1            | ---                  | ---                             | 222220000 | 0.5474       |
|       |      |              |                      |                                 | 222120100 | 0.1874       |
| 1     | 0    | 3            | 976.9                | 29.3                            | 222211000 | 0.5815       |
|       |      |              |                      |                                 | 222210100 | 0.2126       |
| 2     | 1    | 3            | 852.4                | 33.5                            | 221221000 | 0.3000       |
|       |      |              |                      |                                 | 222210100 | 0.2727       |
|       |      |              |                      |                                 | 222121000 | 0.1554       |
| 3     | 2    | 3            | 838.3                | 34.1                            | 222121000 | 0.2481       |
|       |      |              |                      |                                 | 222120100 | 0.2362       |
|       |      |              |                      |                                 | 222210100 | 0.2024       |
| 4     | 1    | 1            | 807.4                | 35.4                            | 222210100 | 0.8154       |
| 5     | 3    | 3            | 760.1                | 37.6                            | 221221000 | 0.3310       |
|       |      |              |                      |                                 | 222120100 | 0.2764       |
|       |      |              |                      |                                 | 222210100 | 0.1329       |
| 6     | 4    | 3            | 709.7                | 40.3                            | 222121000 | 0.3679       |
|       |      |              |                      |                                 | 222120100 | 0.2309       |
|       |      |              |                      |                                 | 221220100 | 0.1136       |
| 7     | 2    | 1            | 689.8                | 41.4                            | 221220100 | 0.4020       |
|       |      |              |                      |                                 | 222120100 | 0.3202       |
| 8     | 5    | 3            | 637.3                | 44.9                            | 221220100 | 0.6499       |
| 9     | 3    | 1            | 613.5                | 46.6                            | 221220100 | 0.3764       |
|       |      |              |                      |                                 | 222120100 | 0.2350       |
| 10    | 6    | 3            | 596.8                | 47.9                            | 122221000 | 0.4801       |
|       |      |              |                      |                                 | 212221000 | 0.2023       |
| 11    | 4    | 1            | 484.6                | 59.0                            | 122220100 | 0.5112       |
|       |      |              |                      |                                 | 212220100 | 0.2029       |
| 12    | 7    | 3            | 482.1                | 59.3                            | 222210010 | 0.8016       |
| 13    | 5    | 1            | 481.3                | 59.4                            | 222210010 | 0.7047       |
| 14    | 6    | 1            | 474.5                | 60.3                            | 222120010 | 0.5251       |
| 15    | 8    | 3            | 467.9                | 61.1                            | 122220100 | 0.5386       |
|       |      |              |                      |                                 | 212220100 | 0.2152       |
| 16    | 9    | 3            | 455.8                | 62.7                            | 222120010 | 0.7465       |
| 17    | 7    | 1            | 452.5                | 63.2                            | 222210001 | 0.7621       |
| 18    | 10   | 3            | 451.0                | 63.4                            | 222210001 | 0.8027       |
| 19    | 8    | 1            | 433.2                | 66.0                            | 222120001 | 0.3915       |
|       |      |              |                      |                                 | 222121000 | 0.2096       |
| 20    | 11   | 3            | 424.4                | 67.4                            | 222120001 | 0.7536       |



**5D** with Ni–C distance of 3.50 Å (dissociation limit) – CASSCF/NEVPT2 lowest transition energies with CPCM(THF) (10e,8o Active Space) – 25 triplet roots, 15 singlet roots. Active Space Orbitals (in order for CI vector notation below):  $d(xy)$ ,  $d(yz)$ ,  $d(xz)$ ,  $d(z^2)$ ,  $d(x^2-y^2)/C(sp^2)$ ,  $d(x^2-y^2)/C(sp^2)^*$ ,  $\pi^*(1)$ ,  $\pi^*(2)$ .

| State | Root | Multiplicity | $\Delta E/\text{nm}$ | $\Delta E/\text{kcal mol}^{-1}$ | CI vector                        | Contribution               |
|-------|------|--------------|----------------------|---------------------------------|----------------------------------|----------------------------|
| 0     | 0    | 3            | ---                  | ---                             | 22211110                         | 0.7621                     |
| 1     | 0    | 1            | 144645.0             | 0.2                             | 22211110                         | 0.8389                     |
| 2     | 1    | 3            | 23693.9              | 1.2                             | 22121110<br>21221110             | 0.6080<br>0.1898           |
| 3     | 1    | 1            | 8845.5               | 3.2                             | 22121110<br>21221110             | 0.6997<br>0.2182           |
| 4     | 2    | 3            | 8675.4               | 3.3                             | 22121110<br>21221110             | 0.7141<br>0.1922           |
| 5     | 3    | 3            | 5781.4               | 4.9                             | 22211110                         | 0.8421                     |
| 6     | 4    | 3            | 4231.4               | 6.8                             | 21221110<br>22121110             | 0.6016<br>0.1771           |
| 7     | 5    | 3            | 3628.0               | 7.9                             | 21221110<br>22121110             | 0.6604<br>0.1760           |
| 8     | 2    | 1            | 3577.8               | 8.0                             | 21221110<br>22121110             | 0.6547<br>0.1885           |
| 9     | 6    | 3            | 1562.1               | 18.3                            | 12221110<br>21212110<br>22112110 | 0.4151<br>0.3615<br>0.1032 |
| 10    | 3    | 1            | 1516.7               | 18.9                            | 12221110<br>21212110<br>22112110 | 0.4489<br>0.3929<br>0.1122 |
| 11    | 7    | 3            | 1409.8               | 20.3                            | 12221110<br>21212110<br>22112110 | 0.4589<br>0.3610<br>0.1057 |
| 12    | 8    | 3            | 1206.5               | 23.7                            | 22121101<br>21221101             | 0.6931<br>0.2127           |
| 13    | 4    | 1            | 1198.6               | 23.9                            | 22121101<br>21221101             | 0.6882<br>0.2179           |
| 14    | 9    | 3            | 1180.3               | 24.2                            | 22121101<br>21221101             | 0.7223<br>0.1867           |
| 15    | 10   | 3            | 1128.3               | 25.3                            | 12212110                         | 0.8523                     |
| 16    | 5    | 1            | 1123.9               | 25.4                            | 22220110                         | 0.7236                     |
| 17    | 6    | 1            | 1108.6               | 25.8                            | 12212110                         | 0.9091                     |
| 18    | 11   | 3            | 1078.2               | 26.5                            | 22220110                         | 0.7051                     |
| 19    | 7    | 1            | 1071.6               | 26.7                            | 22211101<br>21221101<br>22121101 | 0.4251<br>0.3329<br>0.1168 |
| 20    | 12   | 3            | 1069.0               | 26.7                            | 22211101<br>21221101             | 0.5558<br>0.2265           |



**5D** with Ni–C distance of 3.50 Å (dissociation limit) – CASSCF/QD-NEVPT2 lowest transition energies with CPCM(THF) (10e,8o Active Space) – 25 triplet roots, 15 singlet roots. Active Space Orbitals (in order for CI vector notation below):  $d(xy)$ ,  $d(yz)$ ,  $d(xz)$ ,  $d(z^2)$ ,  $d(x^2-y^2)/C(sp^2)$ ,  $d(x^2-y^2)/C(sp^2)^*$ ,  $\pi^*(1)$ ,  $\pi^*(2)$ .

| State | Root | Multiplicity | $\Delta E/\text{nm}$ | $\Delta E/\text{kcal mol}^{-1}$ | CI vector | Contribution |
|-------|------|--------------|----------------------|---------------------------------|-----------|--------------|
| 0     | 0    | 3            | ---                  | ---                             | 22121110  | 0.6856       |
| 1     | 0    | 1            | ---                  | 0.0                             | 22121110  | 0.6873       |
| 2     | 1    | 3            | 17796.8              | 1.6                             | 22211110  | 0.7623       |
|       |      |              |                      |                                 | 12221110  | 0.1589       |
| 3     | 2    | 3            | 10695.2              | 2.7                             | 22211110  | 0.7181       |
|       |      |              |                      |                                 | 12221110  | 0.1469       |
| 4     | 1    | 1            | 10486.6              | 2.7                             | 22211110  | 0.7183       |
|       |      |              |                      |                                 | 12221110  | 0.1470       |
| 5     | 3    | 3            | 4896.9               | 5.8                             | 22121110  | 0.7002       |
|       |      |              |                      |                                 | 21221110  | 0.1404       |
| 6     | 4    | 3            | 3499.6               | 8.2                             | 21221110  | 0.6906       |
|       |      |              |                      |                                 | 22121110  | 0.1453       |
| 7     | 5    | 3            | 3401.6               | 8.4                             | 21221110  | 0.7252       |
| 8     | 2    | 1            | 3397.1               | 8.4                             | 21221110  | 0.7257       |
| 9     | 6    | 3            | 1523.2               | 18.8                            | 21122110  | 0.4624       |
|       |      |              |                      |                                 | 12221110  | 0.4050       |
| 10    | 3    | 1            | 1522.2               | 18.8                            | 21122110  | 0.4629       |
|       |      |              |                      |                                 | 12221110  | 0.4058       |
| 11    | 7    | 3            | 1371.9               | 20.8                            | 21122110  | 0.4434       |
|       |      |              |                      |                                 | 12221110  | 0.4199       |
| 12    | 8    | 3            | 1241.1               | 23.0                            | 22211101  | 0.7597       |
|       |      |              |                      |                                 | 12221101  | 0.1564       |
| 13    | 9    | 3            | 1230.7               | 23.2                            | 22211101  | 0.7592       |
|       |      |              |                      |                                 | 12221101  | 0.1538       |
| 14    | 4    | 1            | 1227.8               | 23.3                            | 22211101  | 0.7591       |
|       |      |              |                      |                                 | 12221101  | 0.1534       |
| 15    | 5    | 1            | 1151.9               | 24.8                            | 12122110  | 0.5827       |
|       |      |              |                      |                                 | 22121101  | 0.1314       |
| 16    | 10   | 3            | 1149.8               | 24.9                            | 12122110  | 0.5849       |
|       |      |              |                      |                                 | 22121101  | 0.1424       |
| 17    | 11   | 3            | 1068.5               | 26.8                            | 22121101  | 0.5647       |
|       |      |              |                      |                                 | 12122110  | 0.1030       |
| 18    | 6    | 1            | 1068.3               | 26.8                            | 22121101  | 0.5689       |
| 19    | 12   | 3            | 1050.7               | 27.2                            | 22121101  | 0.7059       |
|       |      |              |                      |                                 | 21221101  | 0.1284       |
| 20    | 7    | 1            | 1021.0               | 28.0                            | 22220110  | 0.5580       |
|       |      |              |                      |                                 | 22121101  | 0.1287       |
|       |      |              |                      |                                 | 21221101  | 0.1006       |

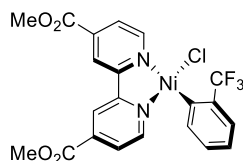

**5D** with Ni–C distance of 1.90 Å (near-equilibrium geometry) – CASSCF/NEVPT2 composition of the singlet ground state with CPCM(THF) (10e,9o Active Space) – 25 triplet roots, 15 singlet roots. Active Space Orbitals (in order for CI vector notation below):  $d(xy)$ ,  $d(x^2-y^2)/C(sp^2)$ ,  $d(yz)$ ,  $d(xz)$ ,  $d(z^2)$ ,  $d(x^2-y^2)/C(sp^2)^*$ ,  $\pi^*(1)$ ,  $\pi^*(2)$ ,  $\pi^*(3)$ .

| CI vector                      | Transition                                                                           | Contribution |
|--------------------------------|--------------------------------------------------------------------------------------|--------------|
| 222220000                      | Closed-shell singlet (CSS) $d^8$                                                     | 0.4852       |
| 222120100                      | $d(xz) \rightarrow \pi^*(1)$                                                         | 0.2865       |
| 212221000                      | $d(x^2-y^2)/C(sp^2) \rightarrow d(x^2-y^2)/C(sp^2)^*$                                | 0.0658       |
| 122221000                      | $d(xy) \rightarrow d(x^2-y^2)/C(sp^2)^*$                                             | 0.0266       |
| 202122100                      | $2x[d(x^2-y^2)/C(sp^2)] + d(xz) \rightarrow 2x[d(x^2-y^2)/C(sp^2)^*] + \pi^*(1)$     | 0.0180       |
| 112122100                      | $d(x^2-y^2)/C(sp^2) + d(xy) + d(xz) \rightarrow 2x[d(x^2-y^2)/C(sp^2)^*] + \pi^*(1)$ | 0.0136       |
| 221220010                      | $d(yz) \rightarrow \pi^*(2)$                                                         | 0.0106       |
| 221220100                      | $d(yz) \rightarrow \pi^*(1)$                                                         | 0.0106       |
| <b>Sum of CSS</b>              |                                                                                      | <b>49 %</b>  |
| <b>Sum of all MLCT</b>         |                                                                                      | <b>31 %</b>  |
| <b>Sum of all d-d</b>          |                                                                                      | <b>9 %</b>   |
| <b>Sum of mixed MLCT + d-d</b> |                                                                                      | <b>3 %</b>   |

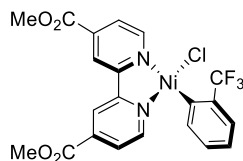

**5D** with Ni–C distance of 1.90 Å (near-equilibrium geometry) – CASSCF/QD-NEVPT2 composition of the singlet ground state with CPCM(THF) (10e,9o Active Space) – 25 triplet roots, 15 singlet roots. Active Space Orbitals (in order for CI vector notation below):  $d(xy)$ ,  $d(x^2-y^2)/C(sp^2)$ ,  $d(yz)$ ,  $d(xz)$ ,  $d(z^2)$ ,  $d(x^2-y^2)/C(sp^2)^*$ ,  $\pi^*(1)$ ,  $\pi^*(2)$ ,  $\pi^*(3)$ .

| CI vector                      | Transition                                                                       | Contribution |
|--------------------------------|----------------------------------------------------------------------------------|--------------|
| 222220000                      | Closed-shell singlet (CSS) $d^8$                                                 | 0.5474       |
| 222120100                      | $d(xz) \rightarrow \pi^*(1)$                                                     | 0.1874       |
| 212221000                      | $d(x^2-y^2)/C(sp^2) \rightarrow d(x^2-y^2)/C(sp^2)^*$                            | 0.0772       |
| 122221000                      | $d(xy) \rightarrow d(x^2-y^2)/C(sp^2)^*$                                         | 0.0316       |
| 221220010                      | $d(yz) \rightarrow \pi^*(2)$                                                     | 0.0207       |
| 221220001                      | $d(yz) \rightarrow \pi^*(3)$                                                     | 0.0190       |
| 222120010                      | $d(xz) \rightarrow \pi^*(2)$                                                     | 0.0124       |
| 202122100                      | $2x[d(x^2-y^2)/C(sp^2)] + d(xz) \rightarrow 2x[d(x^2-y^2)/C(sp^2)^*] + \pi^*(1)$ | 0.0123       |
| <b>Sum of CSS</b>              |                                                                                  | <b>55 %</b>  |
| <b>Sum of all MLCT</b>         |                                                                                  | <b>24 %</b>  |
| <b>Sum of all d-d</b>          |                                                                                  | <b>11 %</b>  |
| <b>Sum of mixed MLCT + d-d</b> |                                                                                  | <b>1 %</b>   |



**5D** with Ni–C distance of 3.50 Å (dissociation limit) – CASSCF/NEVPT2 composition of the singlet ground state with CPCM(THF) (10e,8o Active Space) – 25 triplet roots, 15 singlet roots. Active Space Orbitals (in order for CI vector notation below):  $d(xy)$ ,  $d(yz)$ ,  $d(xz)$ ,  $d(z^2)$ ,  $d(x^2-y^2)/C(sp^2)$ ,  $d(x^2-y^2)/C(sp^2)^*$ ,  $\pi^*(1)$ ,  $\pi^*(2)$ .

| CI vector                      | Transition                                                                | Contribution |
|--------------------------------|---------------------------------------------------------------------------|--------------|
| 22211110                       | $d(x^2-y^2)/C(sp^2) + d(z^2) \rightarrow d(x^2-y^2)/C(sp^2)^* + \pi^*(1)$ | 0.8389       |
| 22221100                       | $d(x^2-y^2)/C(sp^2) \rightarrow d(x^2-y^2)/C(sp^2)^*$                     | 0.0436       |
| 11222110                       | $d(xy) + d(yz) \rightarrow d(x^2-y^2)/C(sp^2)^* + \pi^*(1)$               | 0.0393       |
| 22121110                       | $d(xz) + d(x^2-y^2)/C(sp^2) \rightarrow d(x^2-y^2)/C(sp^2)^* + \pi^*(1)$  | 0.0261       |
| 21122110                       | $d(yz) + d(xz) \rightarrow d(x^2-y^2)/C(sp^2)^* + \pi^*(1)$               | 0.0259       |
| 12122110                       | $d(xy) + d(xz) \rightarrow d(x^2-y^2)/C(sp^2)^* + \pi^*(1)$               | 0.0115       |
| <b>Sum of CSS</b>              |                                                                           | <b>0 %</b>   |
| <b>Sum of all MLCT</b>         |                                                                           | <b>0 %</b>   |
| <b>Sum of all d-d</b>          |                                                                           | <b>4 %</b>   |
| <b>Sum of mixed MLCT + d-d</b> |                                                                           | <b>94 %</b>  |

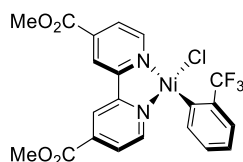

**5D** with Ni–C distance of 3.50 Å (dissociation limit) – CASSCF/QD-NEVPT2 composition of the singlet ground state with CPCM(THF) (10e,8o Active Space) – 25 triplet roots, 15 singlet roots. Active Space Orbitals (in order for CI vector notation below):  $d(xy)$ ,  $d(yz)$ ,  $d(xz)$ ,  $d(z^2)$ ,  $d(x^2-y^2)/C(sp^2)$ ,  $d(x^2-y^2)/C(sp^2)^*$ ,  $\pi^*(1)$ ,  $\pi^*(2)$ .

| CI vector                      | Transition                                                                | Contribution |
|--------------------------------|---------------------------------------------------------------------------|--------------|
| 22121110                       | $d(xz) + d(x^2-y^2)/C(sp^2) \rightarrow d(x^2-y^2)/C(sp^2)^* + \pi^*(1)$  | 0.68730      |
| 22211110                       | $d(x^2-y^2)/C(sp^2) + d(z^2) \rightarrow d(x^2-y^2)/C(sp^2)^* + \pi^*(1)$ | 0.07561      |
| 21221110                       | $d(yz) + d(x^2-y^2)/C(sp^2) \rightarrow d(x^2-y^2)/C(sp^2)^* + \pi^*(1)$  | 0.06710      |
| 22221100                       | $d(x^2-y^2)/C(sp^2) \rightarrow d(x^2-y^2)/C(sp^2)^*$                     | 0.04856      |
| 11222110                       | $d(xy) + d(yz) \rightarrow d(x^2-y^2)/C(sp^2)^* + \pi^*(1)$               | 0.03911      |
| 21221101                       | $d(yz) + d(x^2-y^2)/C(sp^2) \rightarrow d(x^2-y^2)/C(sp^2)^* + \pi^*(2)$  | 0.01809      |
| 12122110                       | $d(xy) + d(xz) \rightarrow d(x^2-y^2)/C(sp^2)^* + \pi^*(1)$               | 0.01636      |
| 22112110                       | $d(xz) + d(z^2) \rightarrow d(x^2-y^2)/C(sp^2)^* + \pi^*(1)$              | 0.01541      |
| 12221110                       | $d(xy) + d(x^2-y^2)/C(sp^2) \rightarrow d(x^2-y^2)/C(sp^2)^* + \pi^*(1)$  | 0.01174      |
| <b>Sum of CSS</b>              |                                                                           | <b>0 %</b>   |
| <b>Sum of all MLCT</b>         |                                                                           | <b>0%</b>    |
| <b>Sum of all d-d</b>          |                                                                           | <b>5 %</b>   |
| <b>Sum of mixed MLCT + d-d</b> |                                                                           | <b>93 %</b>  |



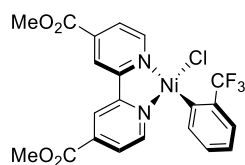

**5D** – CASSCF/NEVPT2 spin-orbit corrected absorption transitions for the CPCM(THF) phase spectrum (10e,9o Active Space) – 25 triplet roots, 15 singlet roots.

| <i>E</i> /nm | <i>E</i> /kcal mol <sup>-1</sup> | <i>f</i> <sub>osc</sub> | <i>E</i> /nm | <i>E</i> /kcal mol <sup>-1</sup> | <i>f</i> <sub>osc</sub> |
|--------------|----------------------------------|-------------------------|--------------|----------------------------------|-------------------------|
| 768.8        | 37.2                             | 0.0002621               | 460.1        | 62.1                             | 0.0001112               |
| 766.3        | 37.3                             | 0.0003275               | 459.8        | 62.2                             | 0.0001265               |
| 756.5        | 37.8                             | 0.0006884               | 455.5        | 62.8                             | 0.0651811               |
| 755.0        | 37.9                             | 0.0015997               | 437.2        | 65.4                             | 0.0412818               |
| 753.7        | 37.9                             | 0.0002683               | 430.8        | 66.4                             | 0.1601436               |
| 750.4        | 38.1                             | 0.0009108               | 429.9        | 66.5                             | 0.0005208               |
| 689.2        | 41.5                             | 0.0584753               | 428.9        | 66.7                             | 0.0088018               |
| 642.9        | 44.5                             | 0.0336157               | 428.3        | 66.8                             | 0.0051300               |
| 639.3        | 44.7                             | 0.0000029               | 427.1        | 66.9                             | 0.0060153               |
| 639.2        | 44.7                             | 0.0000743               | 426.3        | 67.1                             | 0.0180058               |
| 629.8        | 45.4                             | 0.1950159               | 414.0        | 69.1                             | 0.0003513               |
| 592.7        | 48.2                             | 0.0000052               | 413.7        | 69.1                             | 0.0000000               |
| 592.3        | 48.3                             | 0.0000018               | 412.5        | 69.3                             | 0.0095940               |
| 585.4        | 48.8                             | 0.0349406               | 412.1        | 69.4                             | 0.0414799               |
| 495.5        | 57.7                             | 0.0000006               | 403.7        | 70.8                             | 0.0767962               |
| 495.5        | 57.7                             | 0.0028604               | 393.1        | 72.7                             | 0.0000011               |
| 494.8        | 57.8                             | 0.0006131               | 393.0        | 72.8                             | 0.0002871               |
| 493.3        | 58.0                             | 0.0181431               | 392.9        | 72.8                             | 0.0008391               |
| 487.7        | 58.6                             | 0.0008271               | 379.4        | 75.4                             | 0.2089767               |
| 473.6        | 60.4                             | 0.0000207               | 334.4        | 85.5                             | 0.0000001               |
| 473.4        | 60.4                             | 0.0000095               | 334.3        | 85.5                             | 0.0003608               |
| 473.4        | 60.4                             | 0.0004618               | 334.3        | 85.5                             | 0.0004196               |
| 462.5        | 61.8                             | 0.0033080               | 306.5        | 93.3                             | 0.0000049               |
| 462.5        | 61.8                             | 0.0044412               | 305.5        | 93.6                             | 0.0000004               |
| 462.1        | 61.9                             | 0.0034408               | 303.8        | 94.1                             | 0.0000011               |
| 461.4        | 62.0                             | 0.0015125               | 300.7        | 95.1                             | 0.0000223               |
| 460.3        | 62.1                             | 0.0231218               |              |                                  |                         |



**5D** – CASSCF/QD-NEVPT2 spin-orbit corrected absorption transitions for the CPCM(THF) phase spectrum (10e,9o Active Space) – 25 triplet roots, 15 singlet roots.

| <i>E</i> /nm | <i>E</i> /kcal mol <sup>-1</sup> | <i>f</i> <sub>osc</sub> | <i>E</i> /nm | <i>E</i> /kcal mol <sup>-1</sup> | <i>f</i> <sub>osc</sub> |
|--------------|----------------------------------|-------------------------|--------------|----------------------------------|-------------------------|
| 758.6        | 37.7                             | 0.0030556               | 452.2        | 63.2                             | 0.0001246               |
| 754.0        | 37.9                             | 0.0008331               | 451.8        | 63.3                             | 0.0001250               |
| 746.9        | 38.3                             | 0.0003013               | 450.6        | 63.5                             | 0.0208336               |
| 707.4        | 40.4                             | 0.0019030               | 430.2        | 66.5                             | 0.0012843               |
| 704.5        | 40.6                             | 0.0080976               | 423.0        | 67.6                             | 0.0268139               |
| 701.7        | 40.7                             | 0.0002133               | 421.9        | 67.8                             | 0.0029053               |
| 685.2        | 41.7                             | 0.0307524               | 421.5        | 67.8                             | 0.0035269               |
| 630.4        | 45.4                             | 0.0267623               | 420.7        | 68.0                             | 0.0160554               |
| 628.5        | 45.5                             | 0.0003751               | 415.5        | 68.8                             | 0.1136537               |
| 628.1        | 45.5                             | 0.0038891               | 409.2        | 69.9                             | 0.0271454               |
| 608.8        | 47.0                             | 0.2415429               | 407.5        | 70.2                             | 0.0044751               |
| 593.9        | 48.1                             | 0.0007335               | 407.5        | 70.2                             | 0.0002885               |
| 592.6        | 48.2                             | 0.0001039               | 405.8        | 70.5                             | 0.0087835               |
| 590.1        | 48.5                             | 0.0200192               | 401.9        | 71.1                             | 0.0764542               |
| 489.9        | 58.4                             | 0.0268488               | 393.7        | 72.6                             | 0.0345167               |
| 486.6        | 58.8                             | 0.0000154               | 385.9        | 74.1                             | 0.0008208               |
| 486.1        | 58.8                             | 0.0007498               | 385.9        | 74.1                             | 0.0000373               |
| 485.5        | 58.9                             | 0.0086927               | 385.8        | 74.1                             | 0.0000942               |
| 482.0        | 59.3                             | 0.0004380               | 368.5        | 77.6                             | 0.2180530               |
| 469.2        | 60.9                             | 0.0471928               | 330.5        | 86.5                             | 0.0002236               |
| 465.8        | 61.4                             | 0.0002292               | 330.4        | 86.5                             | 0.0000148               |
| 465.7        | 61.4                             | 0.0003089               | 330.4        | 86.5                             | 0.0002164               |
| 465.6        | 61.4                             | 0.0008977               | 308.7        | 92.6                             | 0.0001099               |
| 456.3        | 62.7                             | 0.0597101               | 308.3        | 92.8                             | 0.0000443               |
| 454.8        | 62.9                             | 0.0000150               | 305.3        | 93.6                             | 0.0000624               |
| 454.7        | 62.9                             | 0.0000819               | 300.2        | 95.2                             | 0.0000058               |
| 454.1        | 63.0                             | 0.0069101               |              |                                  |                         |



**5D** – TD-DFT (B3LYP) absorption transitions (singlets only) for the CPCM(THF) phase spectrum.

| <i>E</i> /nm | <i>E</i> /kcal mol <sup>-1</sup> | <i>f</i> <sub>osc</sub> | <i>E</i> /nm | <i>E</i> /kcal mol <sup>-1</sup> | <i>f</i> <sub>osc</sub> |
|--------------|----------------------------------|-------------------------|--------------|----------------------------------|-------------------------|
| 776.6        | 36.8                             | 0.0000000               | 389.9        | 73.3                             | 0.0000000               |
| 703.6        | 40.6                             | 0.0000000               | 378.6        | 75.5                             | 0.0000000               |
| 690.8        | 41.4                             | 0.0000000               | 376.9        | 75.9                             | 0.0000000               |
| 674.9        | 42.4                             | 0.0007586               | 375.7        | 76.1                             | 0.0287201               |
| 669.3        | 42.7                             | 0.0000000               | 371.1        | 77.0                             | 0.0000000               |
| 564.9        | 50.6                             | 0.0000000               | 367.5        | 77.8                             | 0.0075658               |
| 559.5        | 51.1                             | 0.0234375               | 362.2        | 78.9                             | 0.0398702               |
| 547.8        | 52.2                             | 0.0000000               | 360.4        | 79.3                             | 0.0206610               |
| 533.1        | 53.6                             | 0.0000000               | 356.9        | 80.1                             | 0.0000000               |
| 521.1        | 54.9                             | 0.0000000               | 355.5        | 80.4                             | 0.0221700               |
| 519.9        | 55.0                             | 0.0043885               | 350.2        | 81.6                             | 0.0000000               |
| 472.0        | 60.6                             | 0.0000000               | 343.3        | 83.3                             | 0.0445044               |
| 468.8        | 61.0                             | 0.0003831               | 343.2        | 83.3                             | 0.0000000               |
| 466.5        | 61.3                             | 0.0002023               | 341.1        | 83.8                             | 0.0260263               |
| 466.0        | 61.4                             | 0.0016708               | 340.3        | 84.0                             | 0.0000000               |
| 460.7        | 62.1                             | 0.0471579               | 336.1        | 85.1                             | 0.0000000               |
| 457.4        | 62.5                             | 0.0073902               | 334.9        | 85.4                             | 0.0000000               |
| 454.1        | 63.0                             | 0.0000000               | 333.5        | 85.7                             | 0.0000000               |
| 452.2        | 63.2                             | 0.0001540               | 332.1        | 86.1                             | 0.0154172               |
| 427.7        | 66.8                             | 0.0074542               | 331.1        | 86.4                             | 0.0000000               |
| 425.1        | 67.3                             | 0.0092833               | 327.6        | 87.3                             | 0.1124738               |
| 424.9        | 67.3                             | 0.0041785               | 319.6        | 89.5                             | 0.0000000               |
| 423.2        | 67.6                             | 0.0638089               | 319.4        | 89.5                             | 0.1815339               |
| 418.1        | 68.4                             | 0.0002807               | 318.0        | 89.9                             | 0.0000000               |
| 413.4        | 69.2                             | 0.0000000               | 314.0        | 91.1                             | 0.0001908               |
| 410.9        | 69.6                             | 0.0000000               | 312.7        | 91.4                             | 0.0000827               |
| 408.5        | 70.0                             | 0.0000000               | 312.6        | 91.5                             | 0.0000000               |
| 392.9        | 72.8                             | 0.0000000               | 302.3        | 94.6                             | 0.0000000               |
| 390.3        | 73.3                             | 0.0011420               |              |                                  |                         |



**5D** – TD-DFT (B3LYP) absorption transitions (singlets only) for the CPCM(Toluene) phase spectrum.

| <i>E</i> /nm | <i>E</i> /kcal mol <sup>-1</sup> | <i>f</i> <sub>osc</sub> | <i>E</i> /nm | <i>E</i> /kcal mol <sup>-1</sup> | <i>f</i> <sub>osc</sub> |
|--------------|----------------------------------|-------------------------|--------------|----------------------------------|-------------------------|
| 781.7        | 36.6                             | 0.0000000               | 412.7        | 69.3                             | 0.0137589               |
| 768.1        | 37.2                             | 0.0000000               | 411.8        | 69.4                             | 0.0000000               |
| 763.8        | 37.4                             | 0.0000000               | 407.8        | 70.1                             | 0.0000000               |
| 757.5        | 37.7                             | 0.0006640               | 406.7        | 70.3                             | 0.0000000               |
| 676.0        | 42.3                             | 0.0000000               | 386.8        | 73.9                             | 0.0011484               |
| 634.1        | 45.1                             | 0.0028257               | 383.7        | 74.5                             | 0.0356216               |
| 626.8        | 45.6                             | 0.0271883               | 383.5        | 74.6                             | 0.0000000               |
| 621.0        | 46.0                             | 0.0000000               | 382.7        | 74.7                             | 0.0335421               |
| 585.9        | 48.8                             | 0.0000000               | 377.9        | 75.7                             | 0.0000000               |
| 574.4        | 49.8                             | 0.0000000               | 377.1        | 75.8                             | 0.0366655               |
| 547.2        | 52.3                             | 0.0000000               | 375.0        | 76.2                             | 0.0000000               |
| 523.5        | 54.6                             | 0.0001008               | 368.0        | 77.7                             | 0.0291842               |
| 522.3        | 54.7                             | 0.0014984               | 358.0        | 79.9                             | 0.0000000               |
| 511.4        | 55.9                             | 0.0000000               | 353.0        | 81.0                             | 0.0000000               |
| 505.4        | 56.6                             | 0.0000000               | 352.8        | 81.0                             | 0.0000000               |
| 479.7        | 59.6                             | 0.0000000               | 346.1        | 82.6                             | 0.0263784               |
| 476.4        | 60.0                             | 0.0441221               | 345.7        | 82.7                             | 0.0000000               |
| 465.3        | 61.4                             | 0.0061578               | 336.6        | 84.9                             | 0.0000000               |
| 464.3        | 61.6                             | 0.0120738               | 333.3        | 85.8                             | 0.0000000               |
| 464.0        | 61.6                             | 0.0690113               | 331.5        | 86.2                             | 0.0000000               |
| 458.9        | 62.3                             | 0.0017587               | 331.3        | 86.3                             | 0.0000000               |
| 454.7        | 62.9                             | 0.0039244               | 329.0        | 86.9                             | 0.0008015               |
| 454.1        | 63.0                             | 0.0010237               | 313.4        | 91.2                             | 0.0000000               |
| 449.8        | 63.6                             | 0.0000000               | 312.5        | 91.5                             | 0.2994258               |
| 449.4        | 63.6                             | 0.0000000               | 310.5        | 92.1                             | 0.0000000               |
| 444.4        | 64.3                             | 0.0000000               | 309.2        | 92.5                             | 0.0002027               |
| 438.1        | 65.3                             | 0.0034260               | 306.4        | 93.3                             | 0.0004112               |
| 425.8        | 67.1                             | 0.0000000               | 305.3        | 93.7                             | 0.0224672               |
| 425.3        | 67.2                             | 0.0001655               | 304.9        | 93.8                             | 0.0056620               |
| 425.3        | 67.2                             | 0.0006827               | 304.3        | 94.0                             | 0.0019081               |
| 423.0        | 67.6                             | 0.0001306               | 300.2        | 95.2                             | 0.0000000               |

### S3. References.

- (1) Marshall, W. J.; Grushin, V. V. Activation of Chlorobenzene with Ni(0) N,N-Chelates — A Remarkably Profound Effect of a Minuscule Change in Ligand Structure. *Can. J. Chem.* **2005**, *83* (6–7), 640–645. <https://doi.org/10.1139/v05-022>.
- (2) Ting, S. I.; Garakyaraghi, S.; Taliaferro, C. M.; Shields, B. J.; Scholes, G. D.; Castellano, F. N.; Doyle, A. G. 3d-d Excited States of Ni(II) Complexes Relevant to Photoredox Catalysis: Spectroscopic Identification and Mechanistic Implications. *J. Am. Chem. Soc.* **2020**, *142* (12), 5800–5810. <https://doi.org/10.1021/jacs.0c00781>.
- (3) Shields, J. D.; Gray, E. E.; Doyle, A. G. A Modular, Air-Stable Nickel Precatalyst. *Org. Lett.* **2015**, *17* (9), 2166–2169. <https://doi.org/10.1021/acs.orglett.5b00766>.
- (4) Janeta, M.; Heidlas, J. X.; Daugulis, O.; Brookhart, M. 2,4,6-Triphenylpyridinium: A Bulky, Highly Electron-Withdrawing Substituent That Enhances Properties of Nickel(II) Ethylene Polymerization Catalysts. *Angew. Chem. Int. Ed.* **2021**, *60* (9), 4566–4569. <https://doi.org/10.1002/anie.202013854>.
- (5) Shields, B. J.; Kudisch, B.; Scholes, G. D.; Doyle, A. G. Long-Lived Charge-Transfer States of Nickel(II) Aryl Halide Complexes Facilitate Bimolecular Photoinduced Electron Transfer. *J. Am. Chem. Soc.* **2018**, *140* (8), 3035–3039. <https://doi.org/10.1021/jacs.7b13281>.
- (6) Hansch, Corwin.; Leo, A.; Taft, R. W. A Survey of Hammett Substituent Constants and Resonance and Field Parameters. *Chem. Rev.* **1991**, *91* (2), 165–195. <https://doi.org/10.1021/cr00002a004>.
- (7) Yang, L.; Lu, H.-H.; Lai, C.-H.; Li, G.; Zhang, W.; Cao, R.; Liu, F.; Wang, C.; Xiao, J.; Xue, D. Light-Promoted Nickel Catalysis: Etherification of Aryl Electrophiles with Alcohols Catalyzed by a NiII-Aryl Complex. *Angew. Chem. Int. Ed.* **2020**, *59* (31), 12714–12719. <https://doi.org/10.1002/anie.202003359>.
- (8) Shin, J.; Lee, J.; Suh, J.-M.; Park, K. Ligand-Field Transition-Induced C–S Bond Formation from Nickelacycles. *Chem. Sci.* **2021**, *12* (48), 15908–15915. <https://doi.org/10.1039/D1SC05113J>.
- (9) Till, N. A.; Oh, S.; MacMillan, D. W. C.; Bird, M. J. The Application of Pulse Radiolysis to the Study of Ni(I) Intermediates in Ni-Catalyzed Cross-Coupling Reactions. *J. Am. Chem. Soc.* **2021**, *143* (25), 9332–9337. <https://doi.org/10.1021/jacs.1c04652>.
- (10) Clifford, S.; Maeder, M. Model-Based Analysis for Kinetic and Equilibrium Investigations. *Crit. Rev. Anal. Chem.* **2006**, *36*, 199–209. <https://doi.org/10.1080/10408340600969619>.
- (11) Gampp, H.; Maeder, M.; Meyer, C. J.; Zuberbühler, A. D. Calculation of Equilibrium Constants from Multiwavelength Spectroscopic Data--II: SPECFIT: Two User-Friendly Programs in Basic and Standard FORTRAN 77. *Talanta* **1985**, *32* (4), 257–264. [https://doi.org/10.1016/0039-9140\(85\)80077-1](https://doi.org/10.1016/0039-9140(85)80077-1).
- (12) Mohadjer Beromi, M.; Brudvig, G. W.; Hazari, N.; Lant, H. M. C.; Mercado, B. Q. Synthesis and Reactivity of Paramagnetic Nickel Polypyridyl Complexes Relevant to C(Sp<sup>2</sup>)–C(Sp<sup>3</sup>) Coupling Reactions. *Angew. Chem. Int. Ed.* **2019**, *58* (18), 6094–6098. <https://doi.org/10.1002/anie.201901866>.
- (13) Engel, T.; Reid, P. *Physical Chemistry*, 2nd ed.; Pearson Prentice Hall, 2010.
- (14) Stadler, E.; Eibel, A.; Fast, D.; Freißmuth, H.; Holly, C.; Wiech, M.; Moszner, N.; Gescheidt, G. A Versatile Method for the Determination of Photochemical Quantum

- Yields via Online UV-Vis Spectroscopy. *Photochem. Photobiol. Sci.* **2018**, *17* (5), 660–669. <https://doi.org/10.1039/C7PP00401J>.
- (15) Neese, F. Software Update: The ORCA Program System, Version 4.0. *WIREs Comput. Mol. Sci.* **2018**, *8* (1), e1327. <https://doi.org/10.1002/wcms.1327>.
- (16) Neese, F. The ORCA Program System. *WIREs Comput. Mol. Sci.* **2012**, *2* (1), 73–78. <https://doi.org/10.1002/wcms.81>.
- (17) Perdew, J. P. Density-Functional Approximation for the Correlation Energy of the Inhomogeneous Electron Gas. *Phys. Rev. B* **1986**, *33* (12), 8822–8824. <https://doi.org/10.1103/PhysRevB.33.8822>.
- (18) Becke, A. D. Density-Functional Exchange-Energy Approximation with Correct Asymptotic Behavior. *Phys. Rev. A* **1988**, *38* (6), 3098–3100. <https://doi.org/10.1103/PhysRevA.38.3098>.
- (19) Weigend, F.; Ahlrichs, R. Balanced Basis Sets of Split Valence, Triple Zeta Valence and Quadruple Zeta Valence Quality for H to Rn: Design and Assessment of Accuracy. *Phys. Chem. Chem. Phys.* **2005**, *7* (18), 3297–3305. <https://doi.org/10.1039/B508541A>.
- (20) Grimme, S.; Antony, J.; Ehrlich, S.; Krieg, H. A Consistent and Accurate Ab Initio Parametrization of Density Functional Dispersion Correction (DFT-D) for the 94 Elements H–Pu. *J. Chem. Phys.* **2010**, *132* (15), 154104. <https://doi.org/10.1063/1.3382344>.
- (21) Grimme, S.; Ehrlich, S.; Goerigk, L. Effect of the Damping Function in Dispersion Corrected Density Functional Theory. *J. Comput. Chem.* **2011**, *32* (7), 1456–1465. <https://doi.org/10.1002/jcc.21759>.
- (22) Barone, V.; Cossi, M. Quantum Calculation of Molecular Energies and Energy Gradients in Solution by a Conductor Solvent Model. *J. Phys. Chem. A* **1998**, *102* (11), 1995–2001. <https://doi.org/10.1021/jp9716997>.
- (23) Klamt, A.; Schüürmann, G. COSMO: A New Approach to Dielectric Screening in Solvents with Explicit Expressions for the Screening Energy and Its Gradient. *J. Chem. Soc. Perkin Trans. 2* **1993**, No. 5, 799–805. <https://doi.org/10.1039/P29930000799>.
- (24) Eichkorn, K.; Treutler, O.; Öhm, H.; Häser, M.; Ahlrichs, R. Auxiliary Basis Sets to Approximate Coulomb Potentials. *Chem. Phys. Lett.* **1995**, *240* (4), 283–290. [https://doi.org/10.1016/0009-2614\(95\)00621-A](https://doi.org/10.1016/0009-2614(95)00621-A).
- (25) Löwdin, P. On the Non-Orthogonality Problem Connected with the Use of Atomic Wave Functions in the Theory of Molecules and Crystals. *J. Chem. Phys.* **1950**, *18* (3), 365–375. <https://doi.org/10.1063/1.1747632>.
- (26) Becke, A. D. Density-functional Thermochemistry. III. The Role of Exact Exchange. *J. Chem. Phys.* **1993**, *98* (7), 5648–5652. <https://doi.org/10.1063/1.464913>.
- (27) Lee, C.; Yang, W.; Parr, R. G. Development of the Colle-Salvetti Correlation-Energy Formula into a Functional of the Electron Density. *Phys. Rev. B* **1988**, *37* (2), 785–789. <https://doi.org/10.1103/PhysRevB.37.785>.
- (28) Neese, F.; Wennmohs, F.; Hansen, A.; Becker, U. Efficient, Approximate and Parallel Hartree–Fock and Hybrid DFT Calculations. A ‘Chain-of-Spheres’ Algorithm for the Hartree–Fock Exchange. *Chem. Phys.* **2009**, *356* (1), 98–109. <https://doi.org/10.1016/j.chemphys.2008.10.036>.
- (29) Roos, B. O.; Taylor, P. R.; Sigbahn, P. E. M. A Complete Active Space SCF Method (CASSCF) Using a Density Matrix Formulated Super-CI Approach. *Chem. Phys.* **1980**, *48* (2), 157–173. [https://doi.org/10.1016/0301-0104\(80\)80045-0](https://doi.org/10.1016/0301-0104(80)80045-0).

- (30) Siegbahn, P. E. M.; Almlöf, J.; Heiberg, A.; Roos, B. O. The Complete Active Space SCF (CASSCF) Method in a Newton–Raphson Formulation with Application to the HNO Molecule. *J. Chem. Phys.* **1981**, *74* (4), 2384–2396. <https://doi.org/10.1063/1.441359>.
- (31) Angeli, C.; Cimiraglia, R.; Evangelisti, S.; Leininger, T.; Malrieu, J.-P. Introduction of N-Electron Valence States for Multireference Perturbation Theory. *J. Chem. Phys.* **2001**, *114* (23), 10252–10264. <https://doi.org/10.1063/1.1361246>.
- (32) Angeli, C.; Cimiraglia, R.; Malrieu, J.-P. N-Electron Valence State Perturbation Theory: A Fast Implementation of the Strongly Contracted Variant. *Chem. Phys. Lett.* **2001**, *350* (3), 297–305. [https://doi.org/10.1016/S0009-2614\(01\)01303-3](https://doi.org/10.1016/S0009-2614(01)01303-3).
- (33) Angeli, C.; Cimiraglia, R.; Malrieu, J.-P. N-Electron Valence State Perturbation Theory: A Spinless Formulation and an Efficient Implementation of the Strongly Contracted and of the Partially Contracted Variants. *J. Chem. Phys.* **2002**, *117* (20), 9138–9153. <https://doi.org/10.1063/1.1515317>.
- (34) Angeli, C.; Borini, S.; Cestari, M.; Cimiraglia, R. A Quasidegenerate Formulation of the Second Order N-Electron Valence State Perturbation Theory Approach. *J. Chem. Phys.* **2004**, *121* (9), 4043–4049. <https://doi.org/10.1063/1.1778711>.
- (35) Lang, L.; Sivalingam, K.; Neese, F. The Combination of Multipartitioning of the Hamiltonian with Canonical Van Vleck Perturbation Theory Leads to a Hermitian Variant of Quasidegenerate N-Electron Valence Perturbation Theory. *J. Chem. Phys.* **2020**, *152* (1), 014109. <https://doi.org/10.1063/1.5133746>.
- (36) Grimme, S. Improved Second-Order Møller–Plesset Perturbation Theory by Separate Scaling of Parallel- and Antiparallel-Spin Pair Correlation Energies. *J. Chem. Phys.* **2003**, *118* (20), 9095–9102. <https://doi.org/10.1063/1.1569242>.
- (37) Riplinger, C.; Neese, F. An Efficient and near Linear Scaling Pair Natural Orbital Based Local Coupled Cluster Method. *J. Chem. Phys.* **2013**, *138* (3), 034106. <https://doi.org/10.1063/1.4773581>.
- (38) Riplinger, C.; Sandhoefer, B.; Hansen, A.; Neese, F. Natural Triple Excitations in Local Coupled Cluster Calculations with Pair Natural Orbitals. *J. Chem. Phys.* **2013**, *139* (13), 134101. <https://doi.org/10.1063/1.4821834>.
- (39) Weigend, F.; Ahlrichs, R. Balanced Basis Sets of Split Valence, Triple Zeta Valence and Quadruple Zeta Valence Quality for H to Rn: Design and Assessment of Accuracy. *Phys. Chem. Chem. Phys.* **2005**, *7* (18), 3297–3305. <https://doi.org/10.1039/B508541A>.

## S4. NMR Spectra.

Proton nuclear magnetic resonance ( $^1\text{H}$  NMR) and fluorine nuclear magnetic resonance ( $^{19}\text{F}$  NMR) spectra were recorded on a 400 MHz Varian Spectrometer with broadband auto-tune OneProbe. All  $^{13}\text{C}$  NMR spectra were collected on a Bruker AV-III HD 400 MHz spectrometer.  $^{13}\text{C}$  NMR spectra were  $^1\text{H}$  decoupled. Chemical shifts are reported in parts per million ( $\delta$  in ppm, s: singlet, d: doublet, t: triplet, m: multiplet) and are referenced to residual solvent signal ( $\text{CD}_2\text{Cl}_2 = \delta$  5.32 ppm,  $\text{CD}_3\text{CN} = \delta$  1.94 ppm). Fluorine NMR were externally referenced to neat fluorobenzene ( $\delta = -113.15$  ppm).

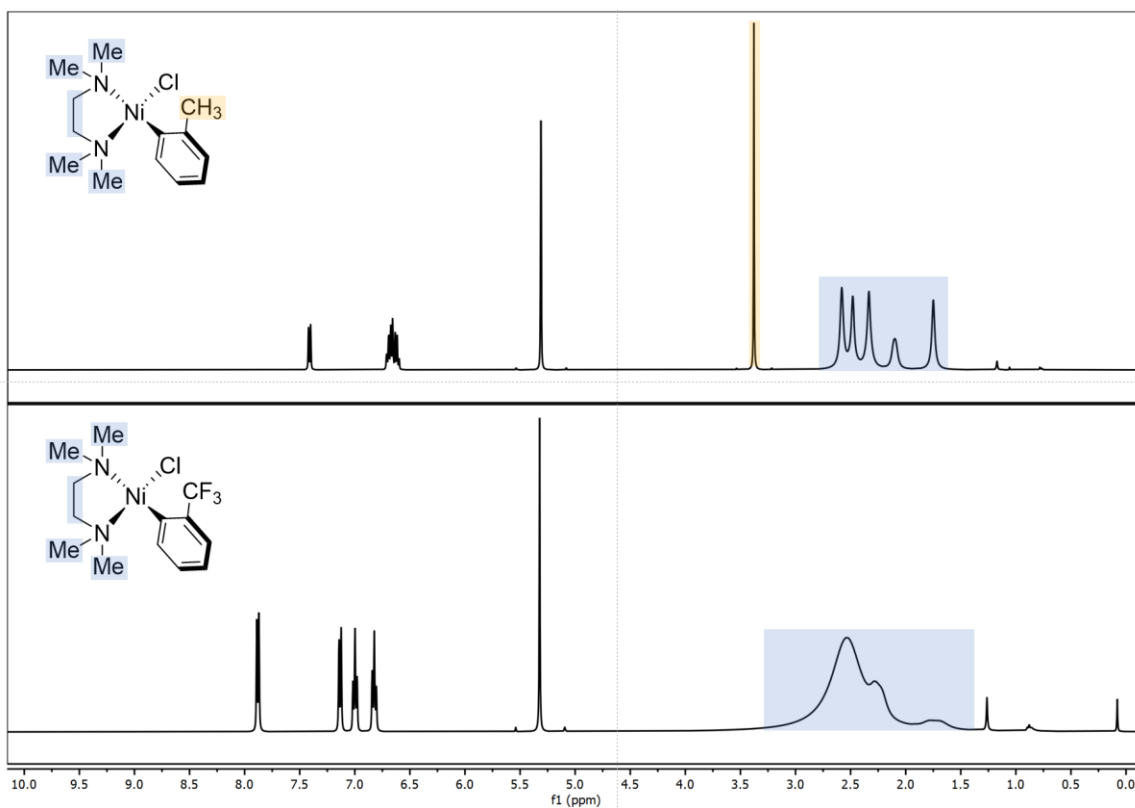

**Figure S71.** Comparison between the  $^1\text{H}$  NMR (400 MHz,  $\text{CD}_2\text{Cl}_2$ ) spectra of the Ni(TMEDA) complexes. More detailed spectra are given below.



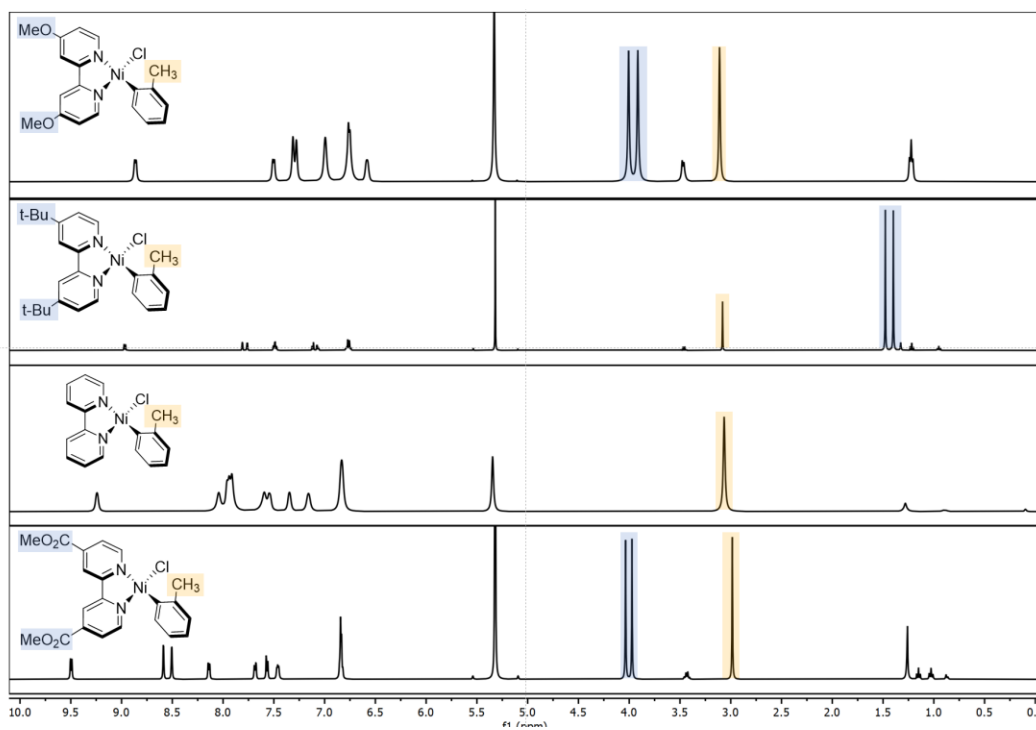

**Figure S72.** Comparison between the  $^1\text{H}$  NMR (400 MHz,  $\text{CD}_2\text{Cl}_2$ ) spectra of **1A–1D**. More detailed spectra are given below.

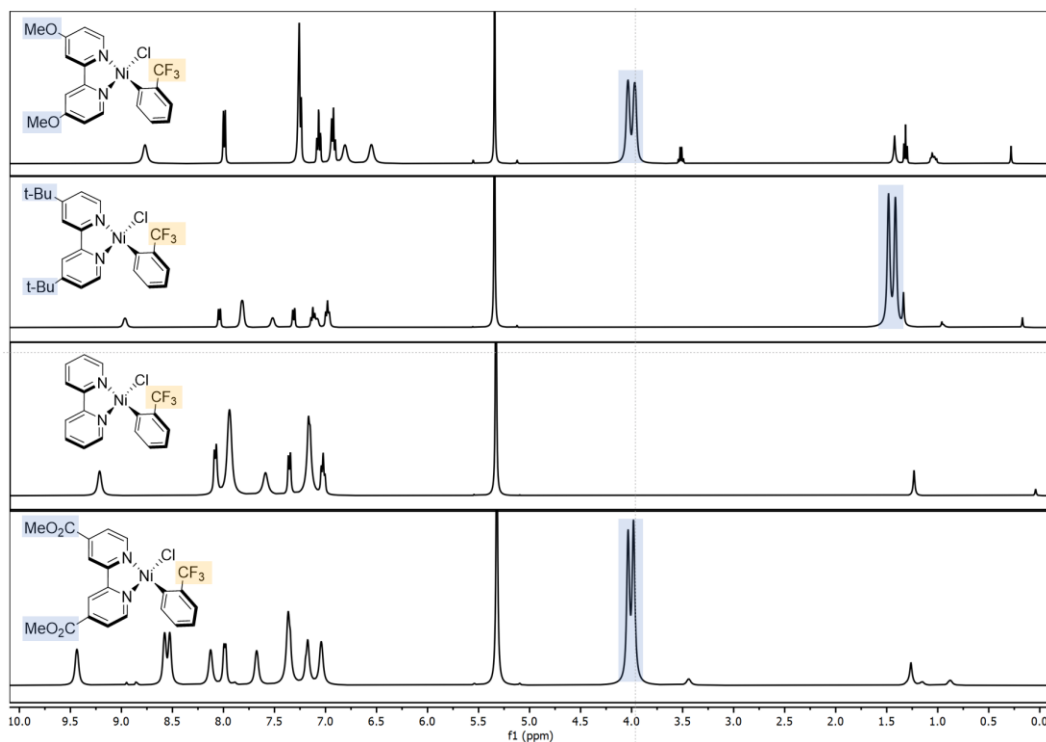

**Figure S73.** Comparison between the  $^1\text{H}$  NMR (400 MHz,  $\text{CD}_2\text{Cl}_2$ ) spectra of **5A–5D**. More detailed spectra are given below.

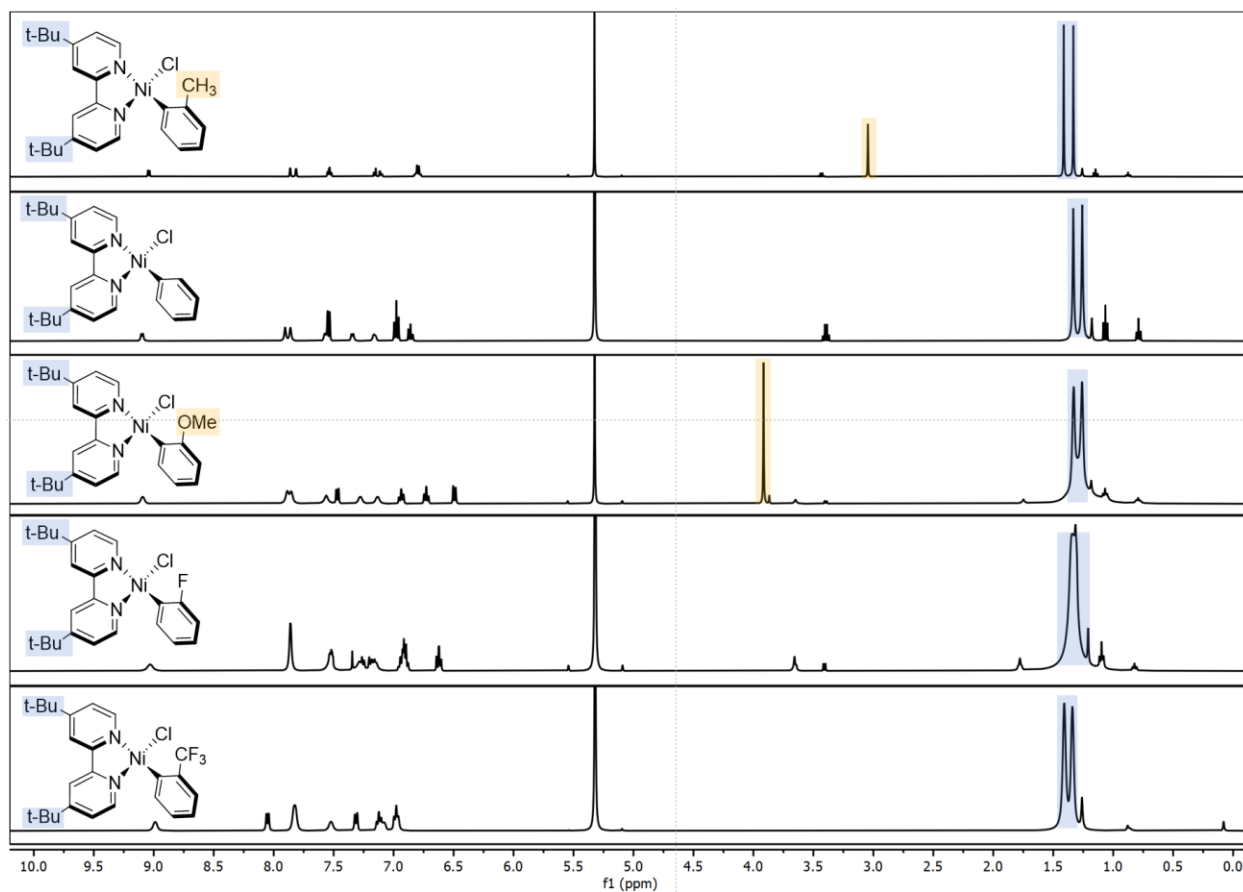

**Figure S74.** Comparison between the  $^1\text{H}$  NMR (400 MHz,  $\text{CD}_2\text{Cl}_2$ ) spectra of **1B**–**5B**. More detailed spectra are given below.

$^1\text{H}$  NMR (400 MHz,  $\text{CD}_2\text{Cl}_2$ ):  $\text{Ni}(\text{TMEDA})(\text{CH}_3\text{Ph})\text{Cl}$

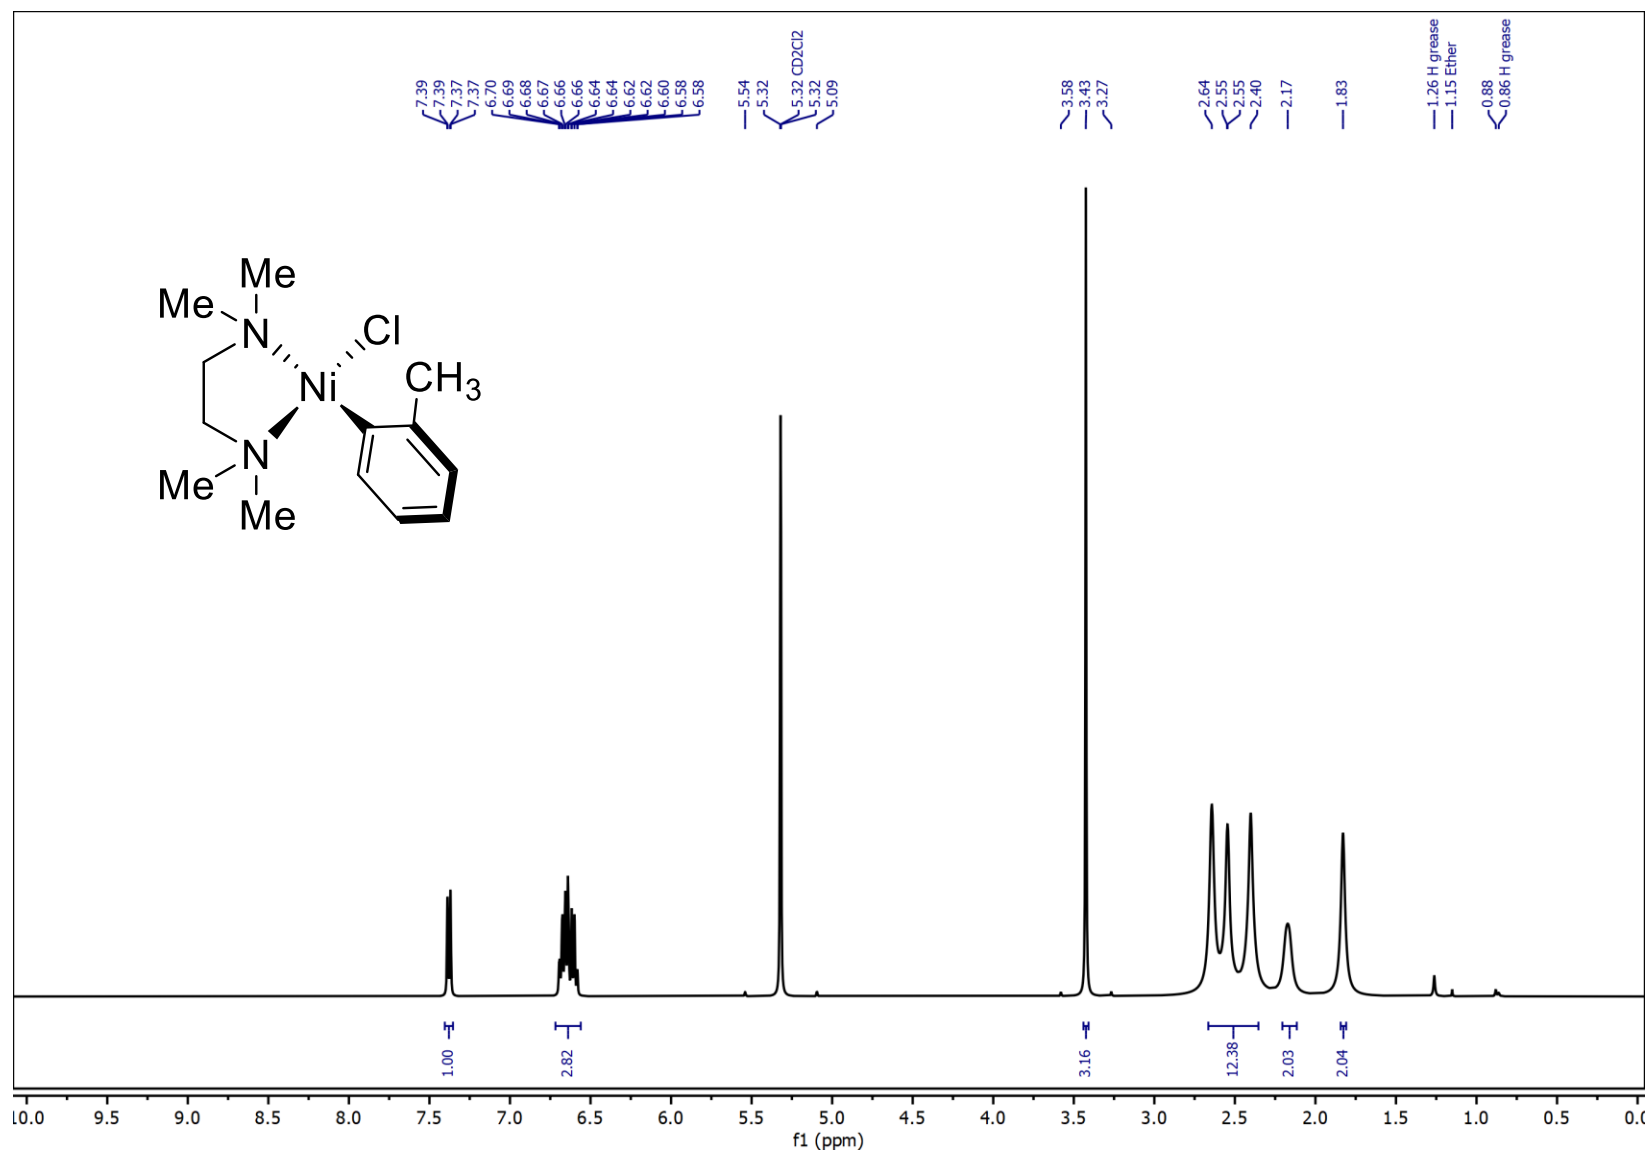

**$^{13}\text{C}$  NMR (100 MHz,  $\text{CD}_2\text{Cl}_2$ ):  $\text{Ni}(\text{TMEDA})(\text{CH}_3\text{Ph})\text{Cl}$**

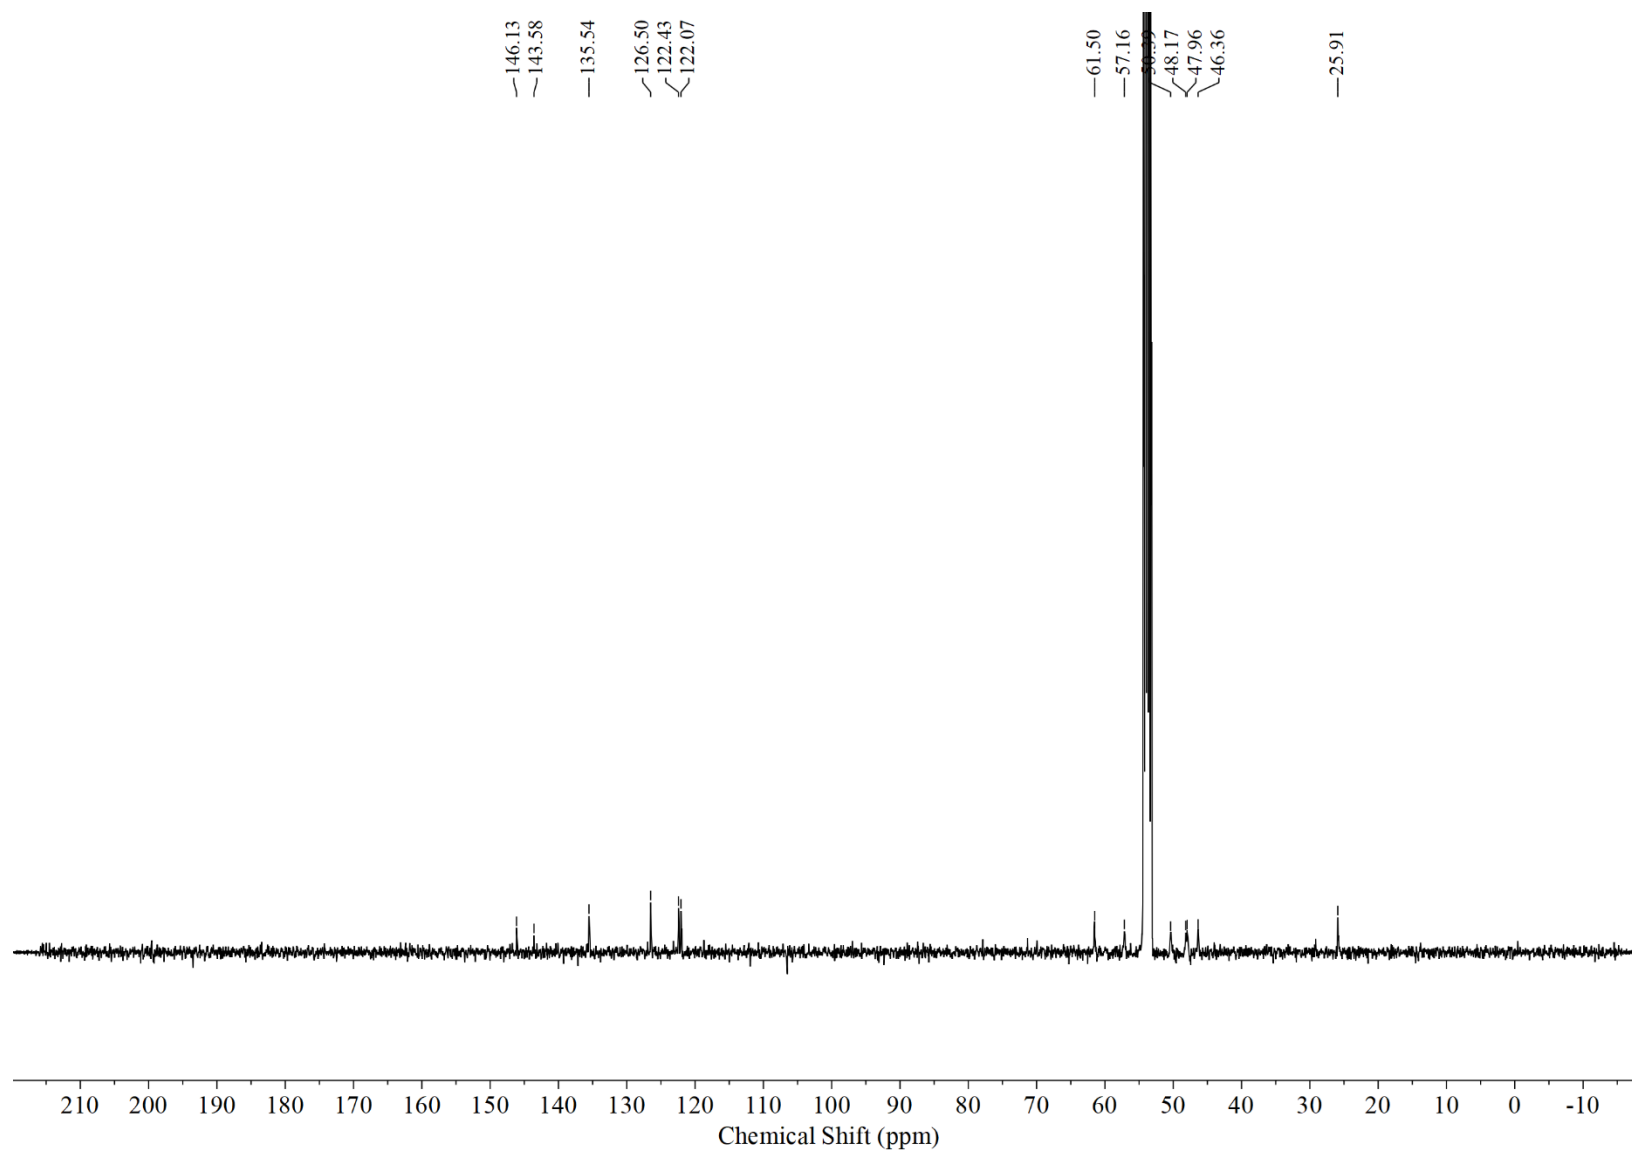

**<sup>1</sup>H NMR (400 MHz, CD<sub>2</sub>Cl<sub>2</sub>): Ni(TMEDA)(CF<sub>3</sub>Ph)Cl**

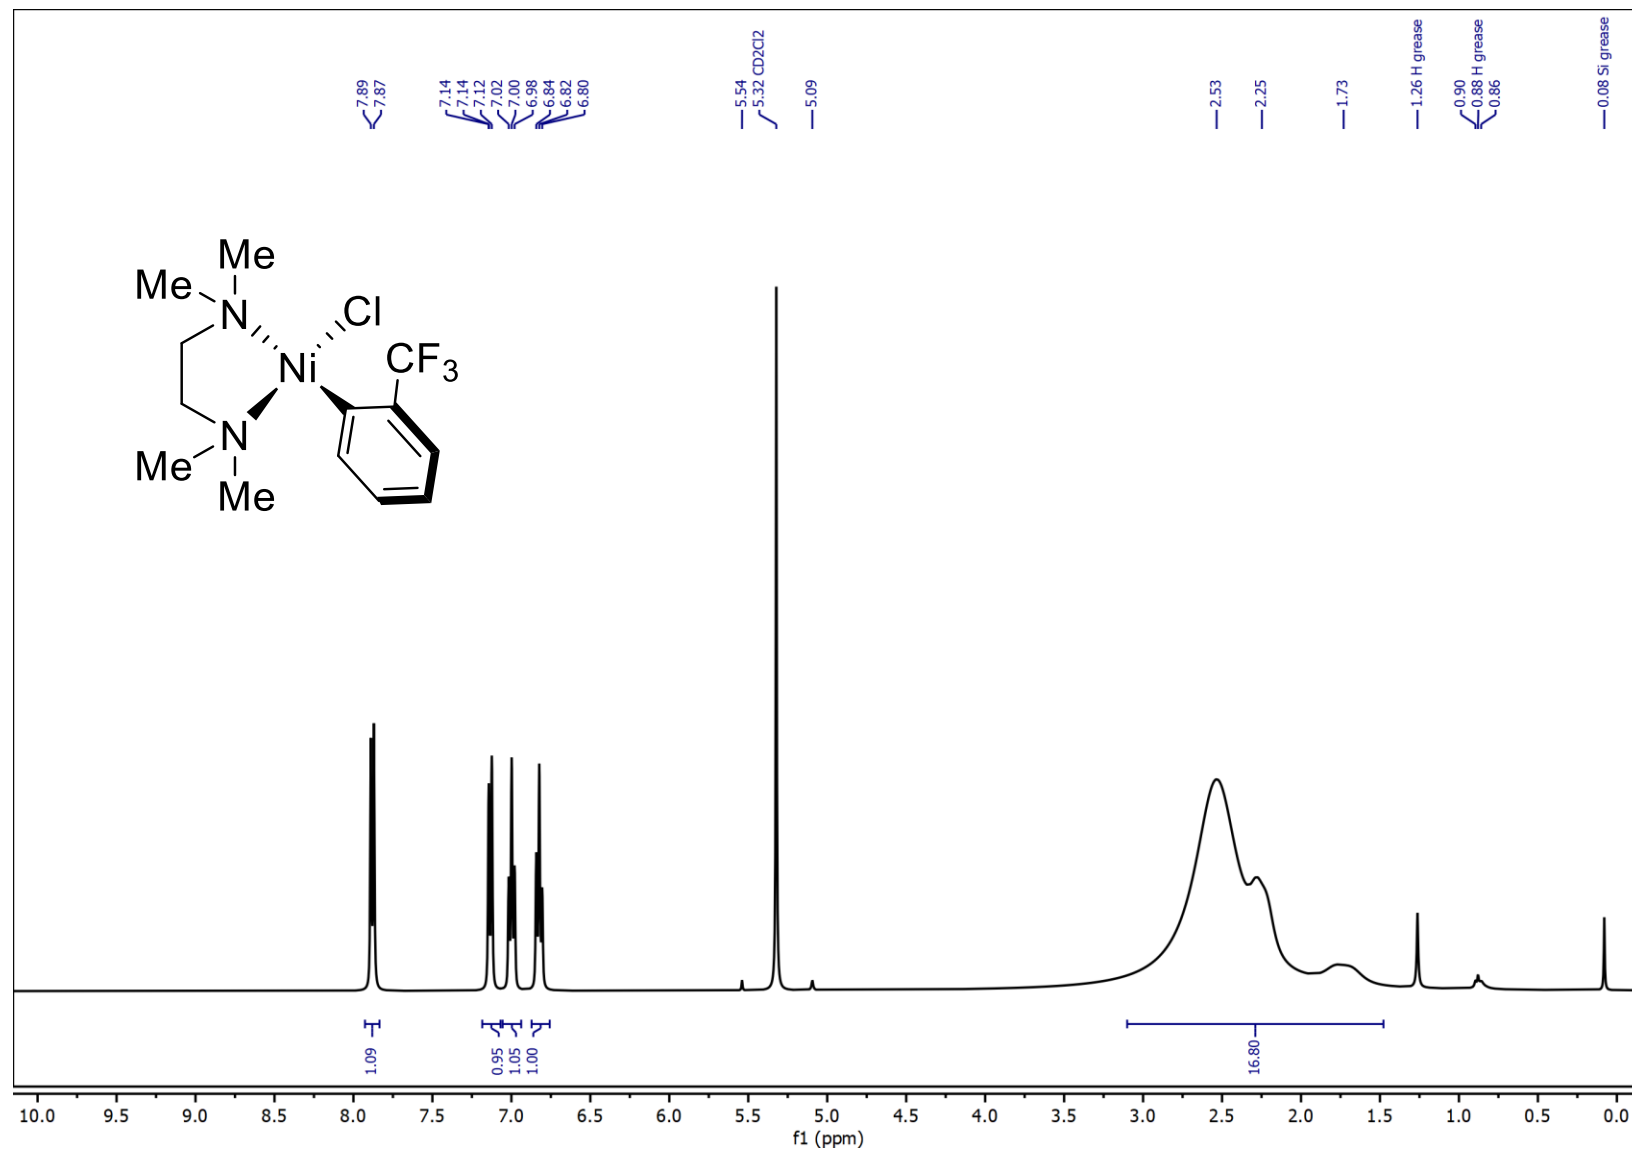

**$^{13}\text{C}$  NMR (100 MHz,  $\text{CD}_2\text{Cl}_2$ ):  $\text{Ni}(\text{TMEDA})(\text{CF}_3\text{Ph})\text{Cl}$**

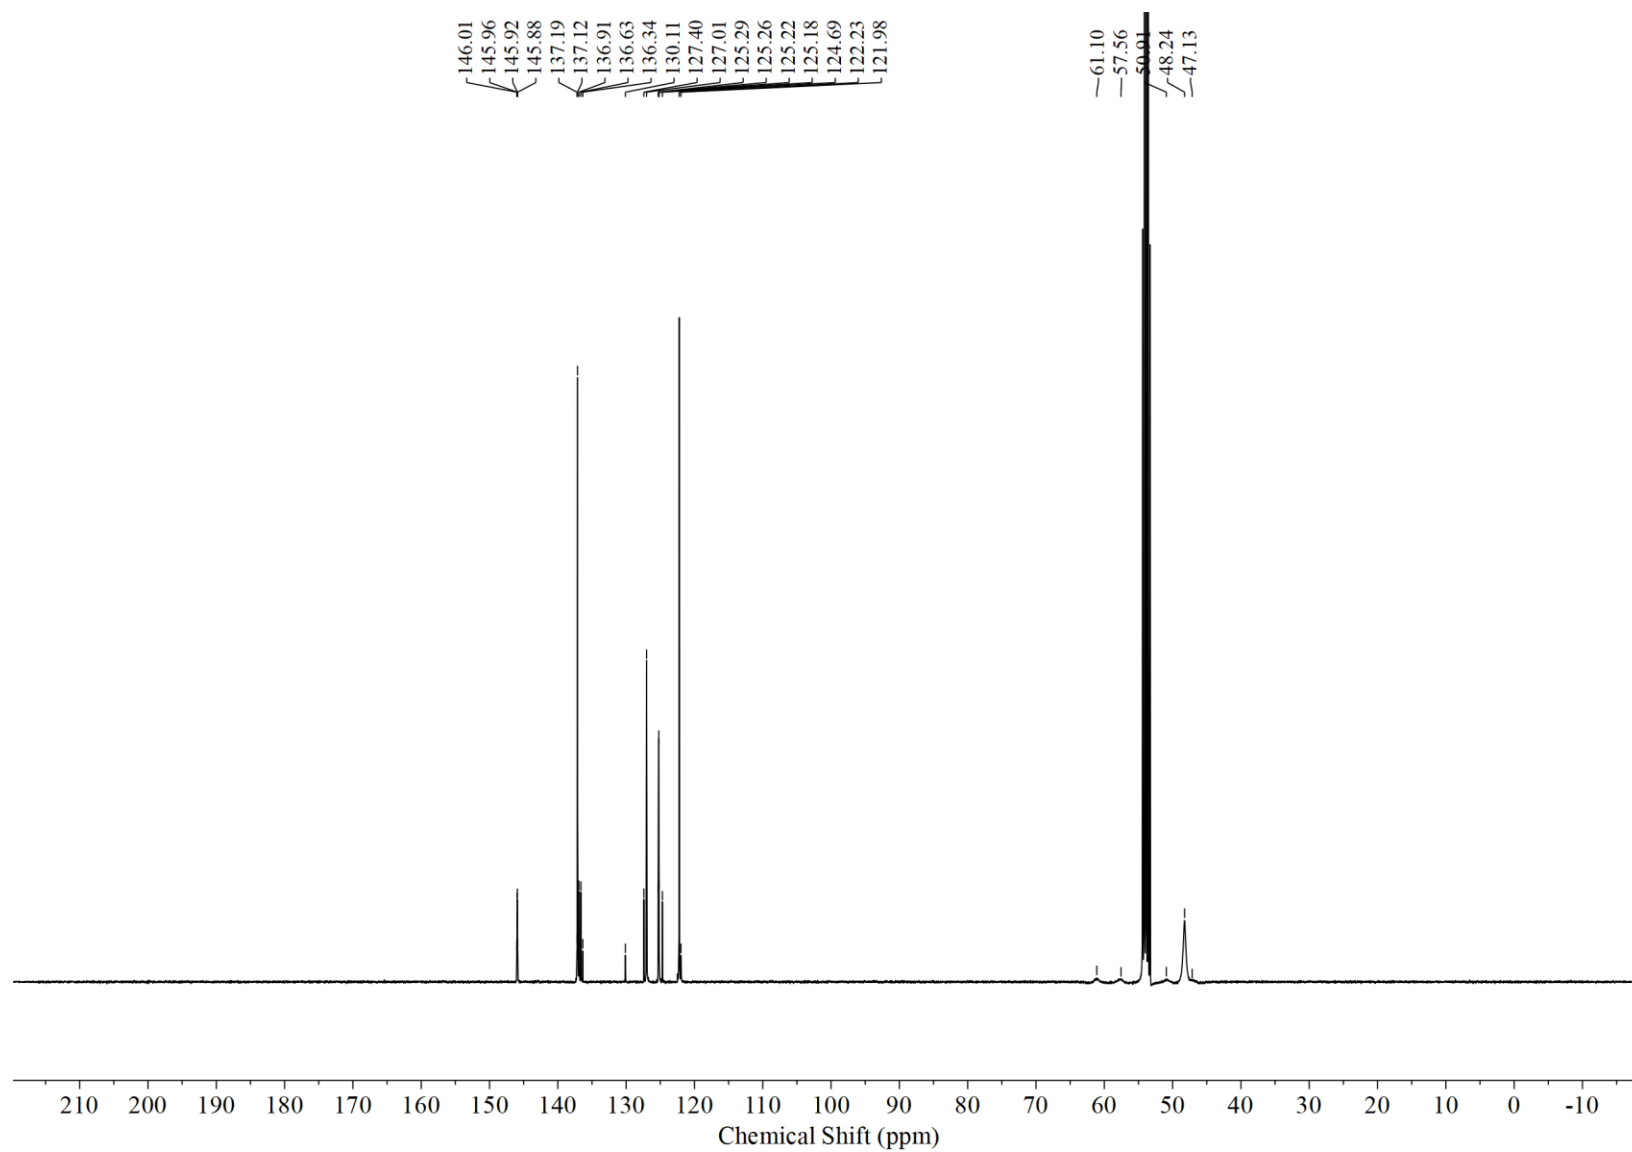

**$^1\text{H}$  NMR (400 MHz,  $\text{CD}_2\text{Cl}_2$ ):  $\text{Ni}(\text{MeO}^i\text{bpy})(\text{CH}_3\text{Ph})\text{Cl}$ , 1A**

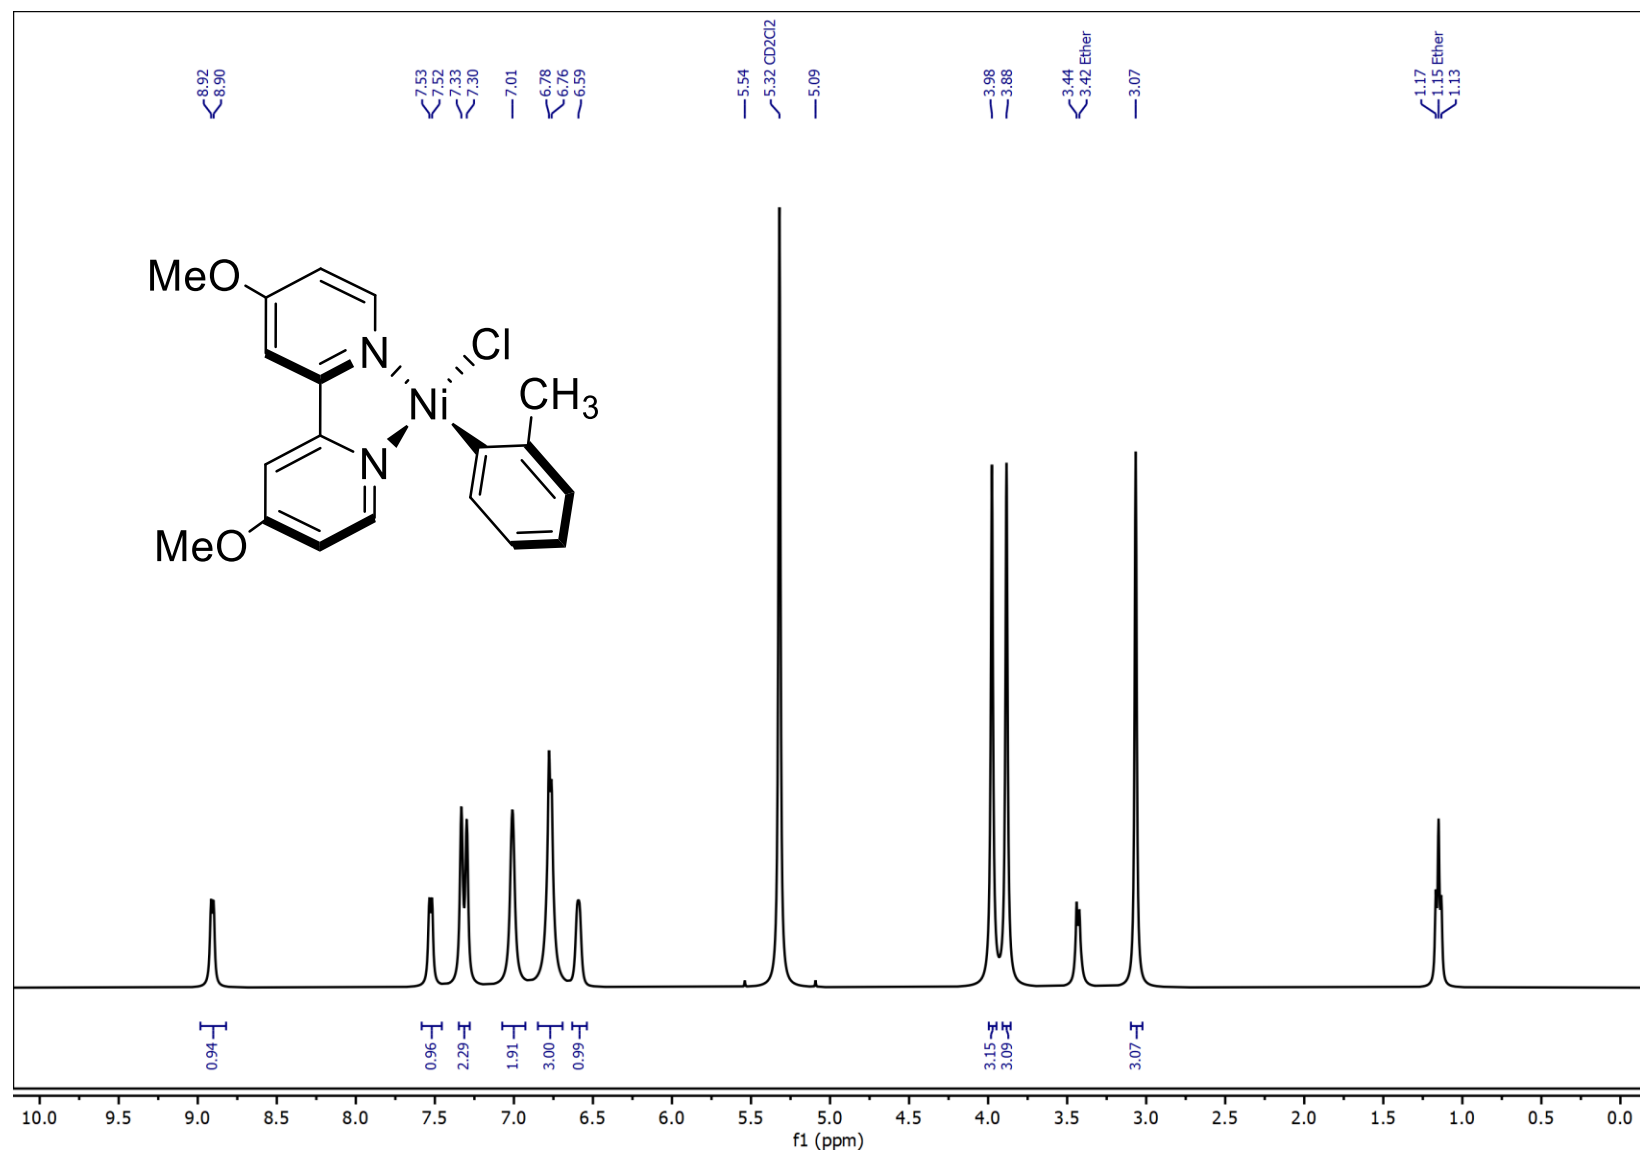

**$^{13}\text{C}$  NMR (100 MHz,  $\text{CD}_2\text{Cl}_2$ ):  $\text{Ni}(\text{MeO}^i\text{bpy})(\text{CH}_3\text{Ph})\text{Cl}$ , 1A**

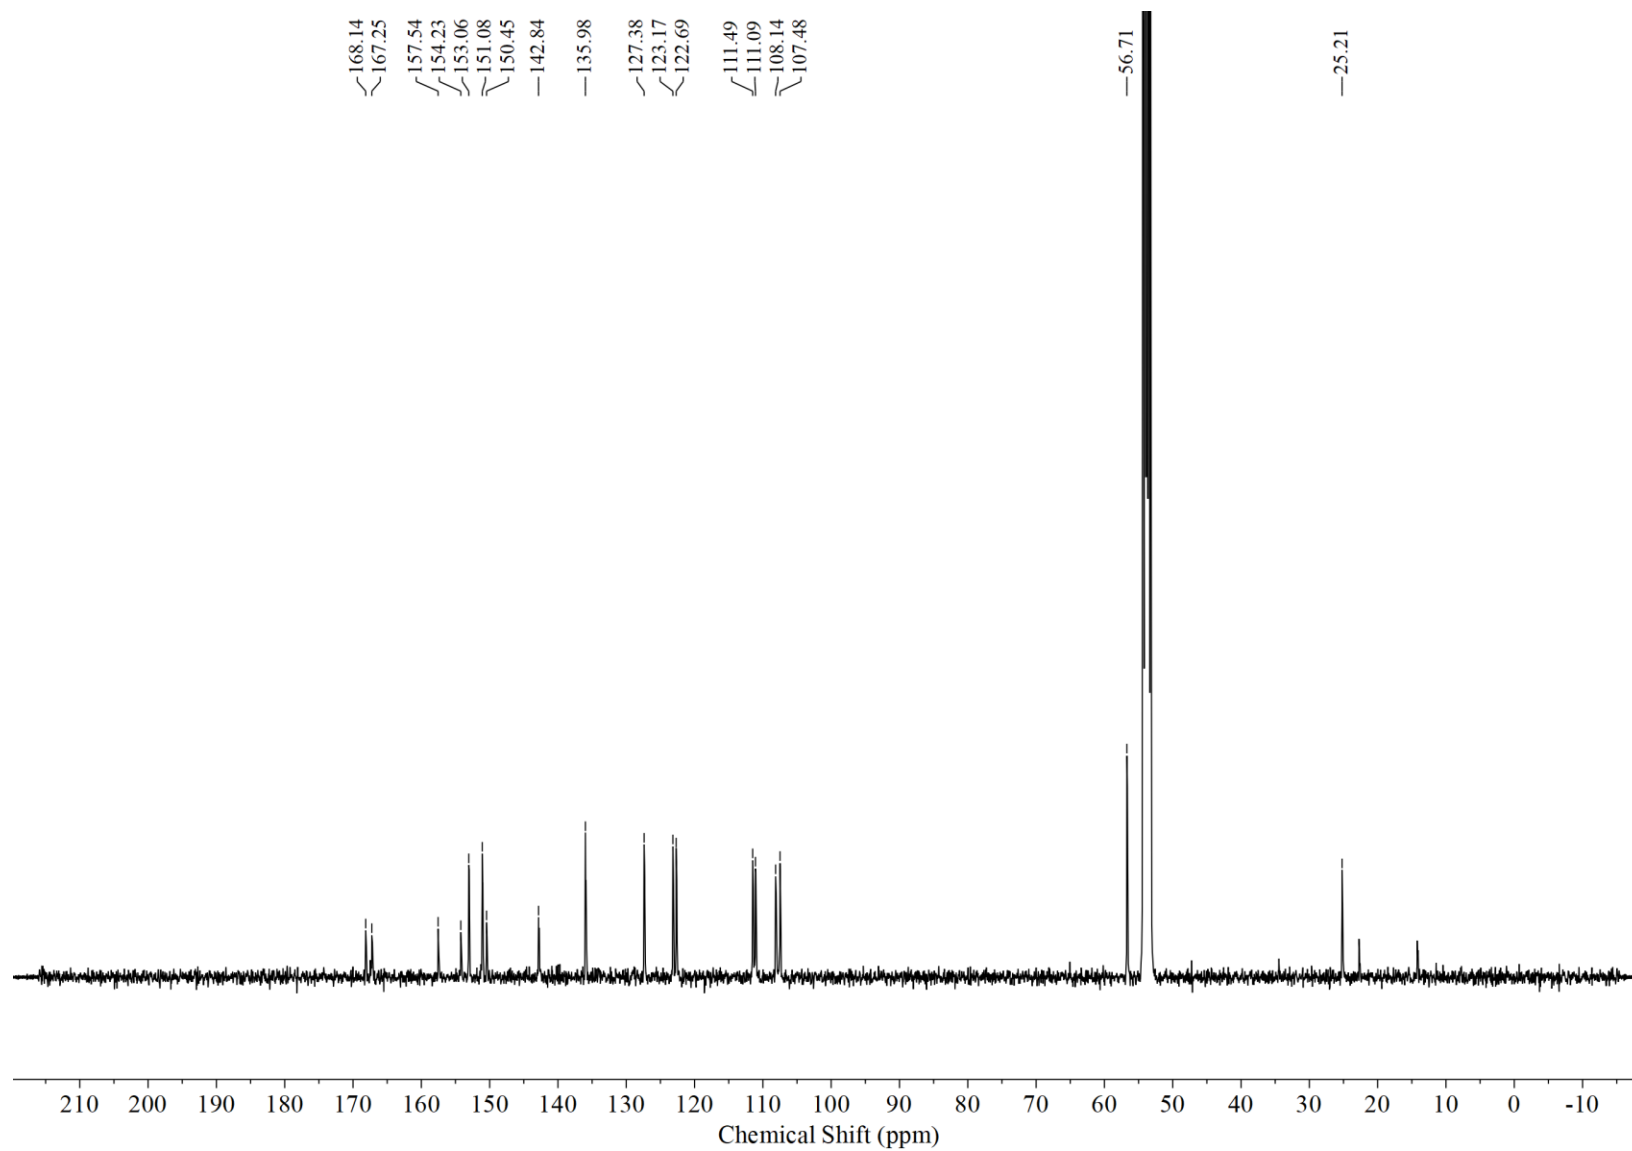



**$^1\text{H}$  NMR (400 MHz,  $\text{CD}_2\text{Cl}_2$ ):  $\text{Ni}(\text{t-Bu}^2\text{bpy})(\text{CH}_3\text{Ph})\text{Cl}$ , 1B**

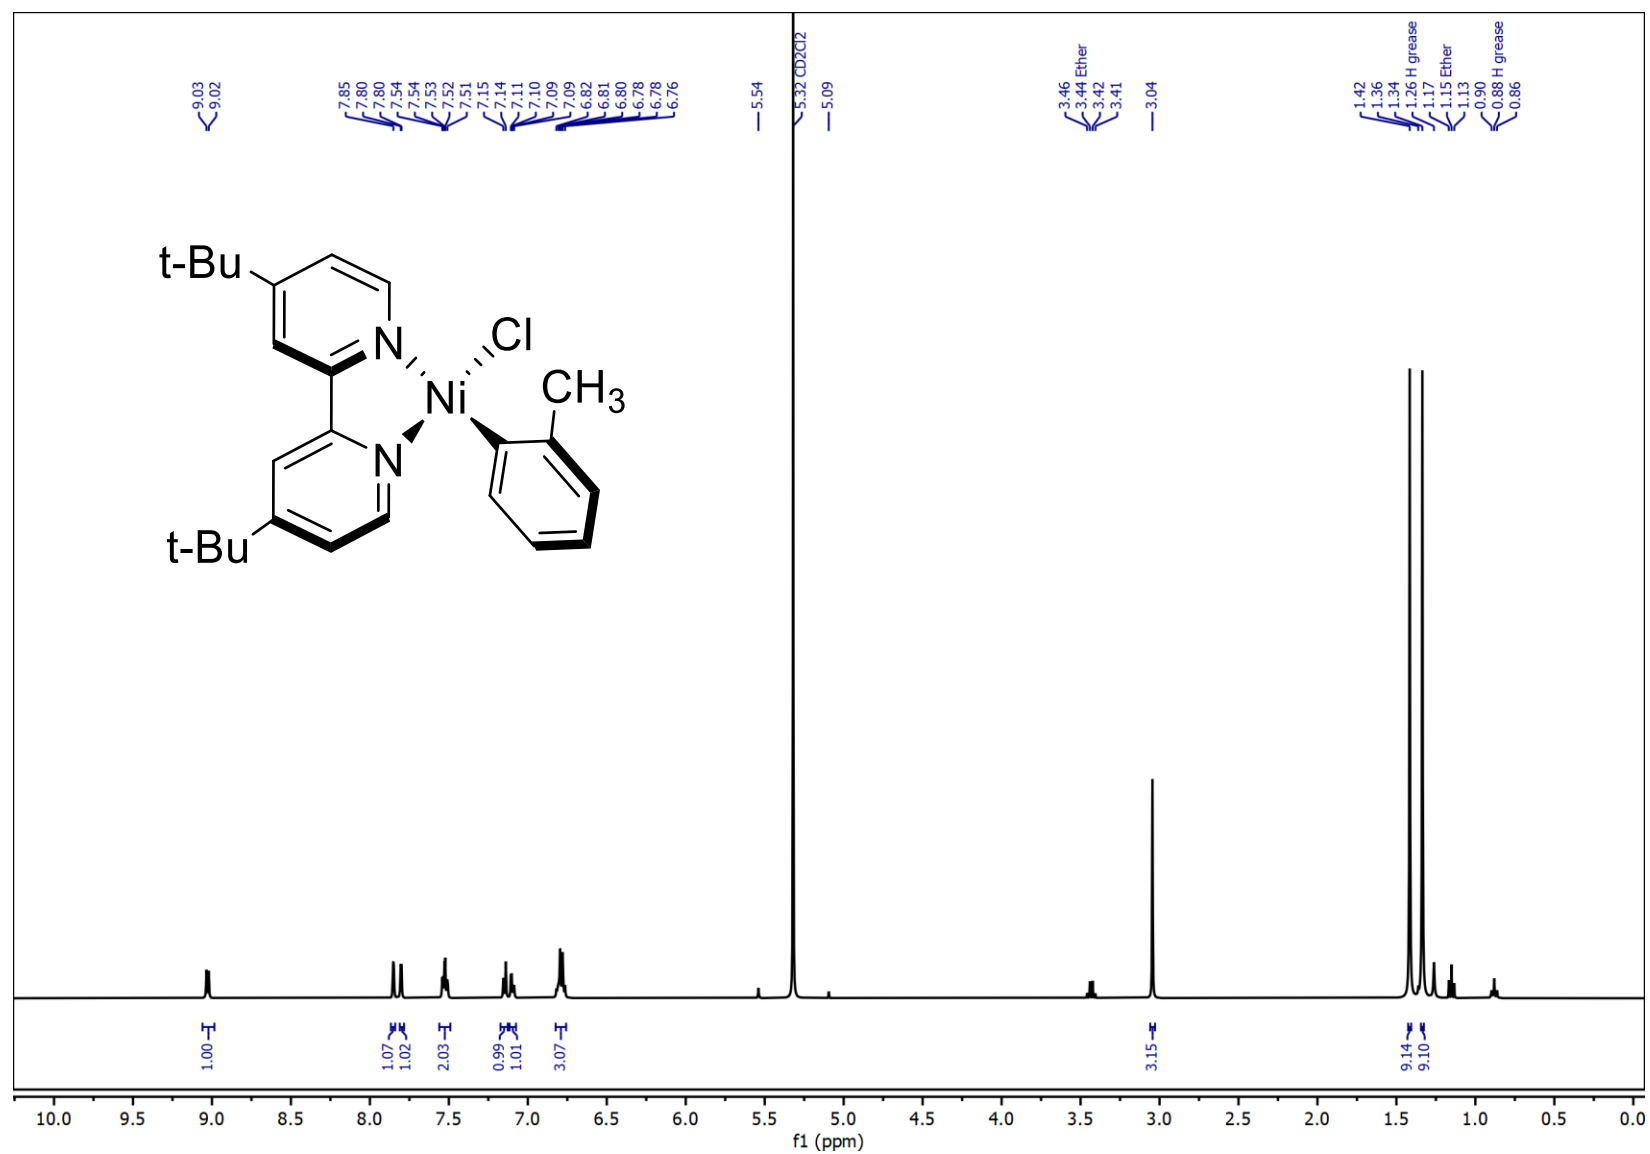

**$^{13}\text{C}$  NMR (100 MHz,  $\text{CD}_2\text{Cl}_2$ ):  $\text{Ni}(\text{}^t\text{Bu}^i\text{bpy})(\text{CH}_3\text{Ph})\text{Cl}$ , **1B****

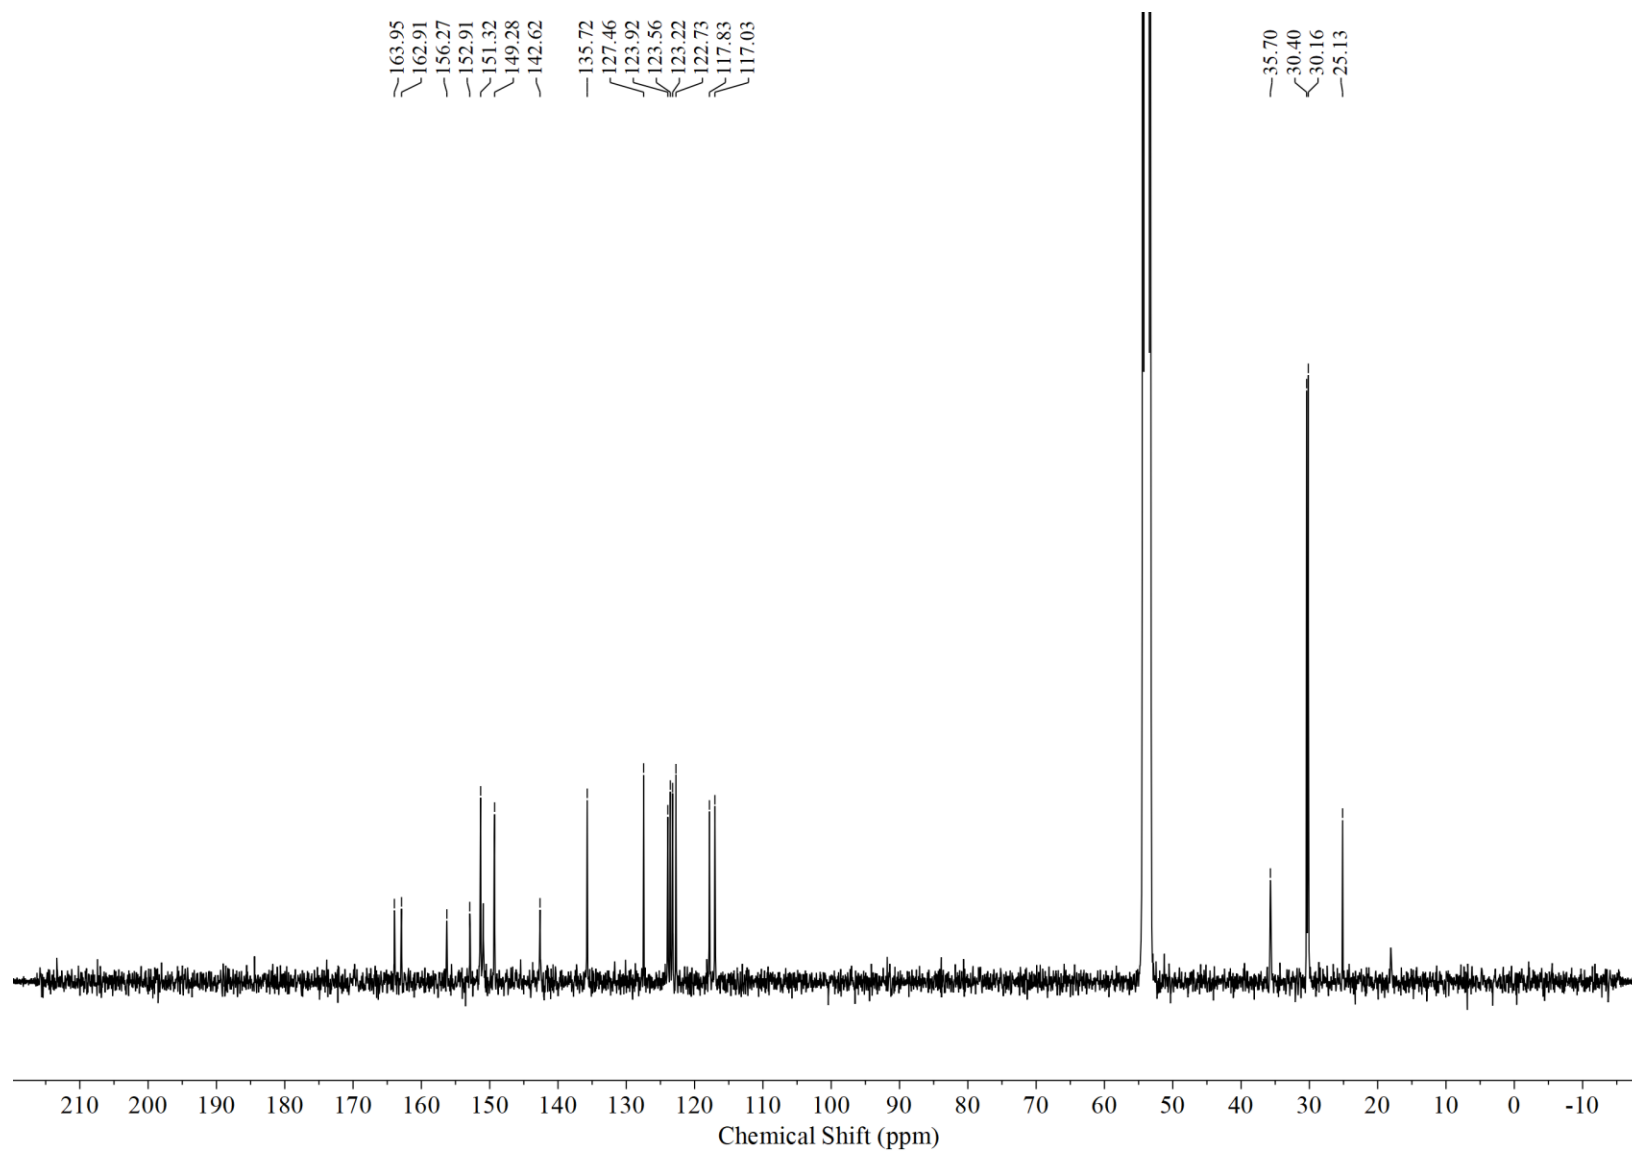

$^1\text{H}$  NMR (400 MHz,  $\text{CD}_2\text{Cl}_2$ ):  $\text{Ni}(\text{Hbpy})(\text{CH}_3\text{Ph})\text{Cl}$ , 1C

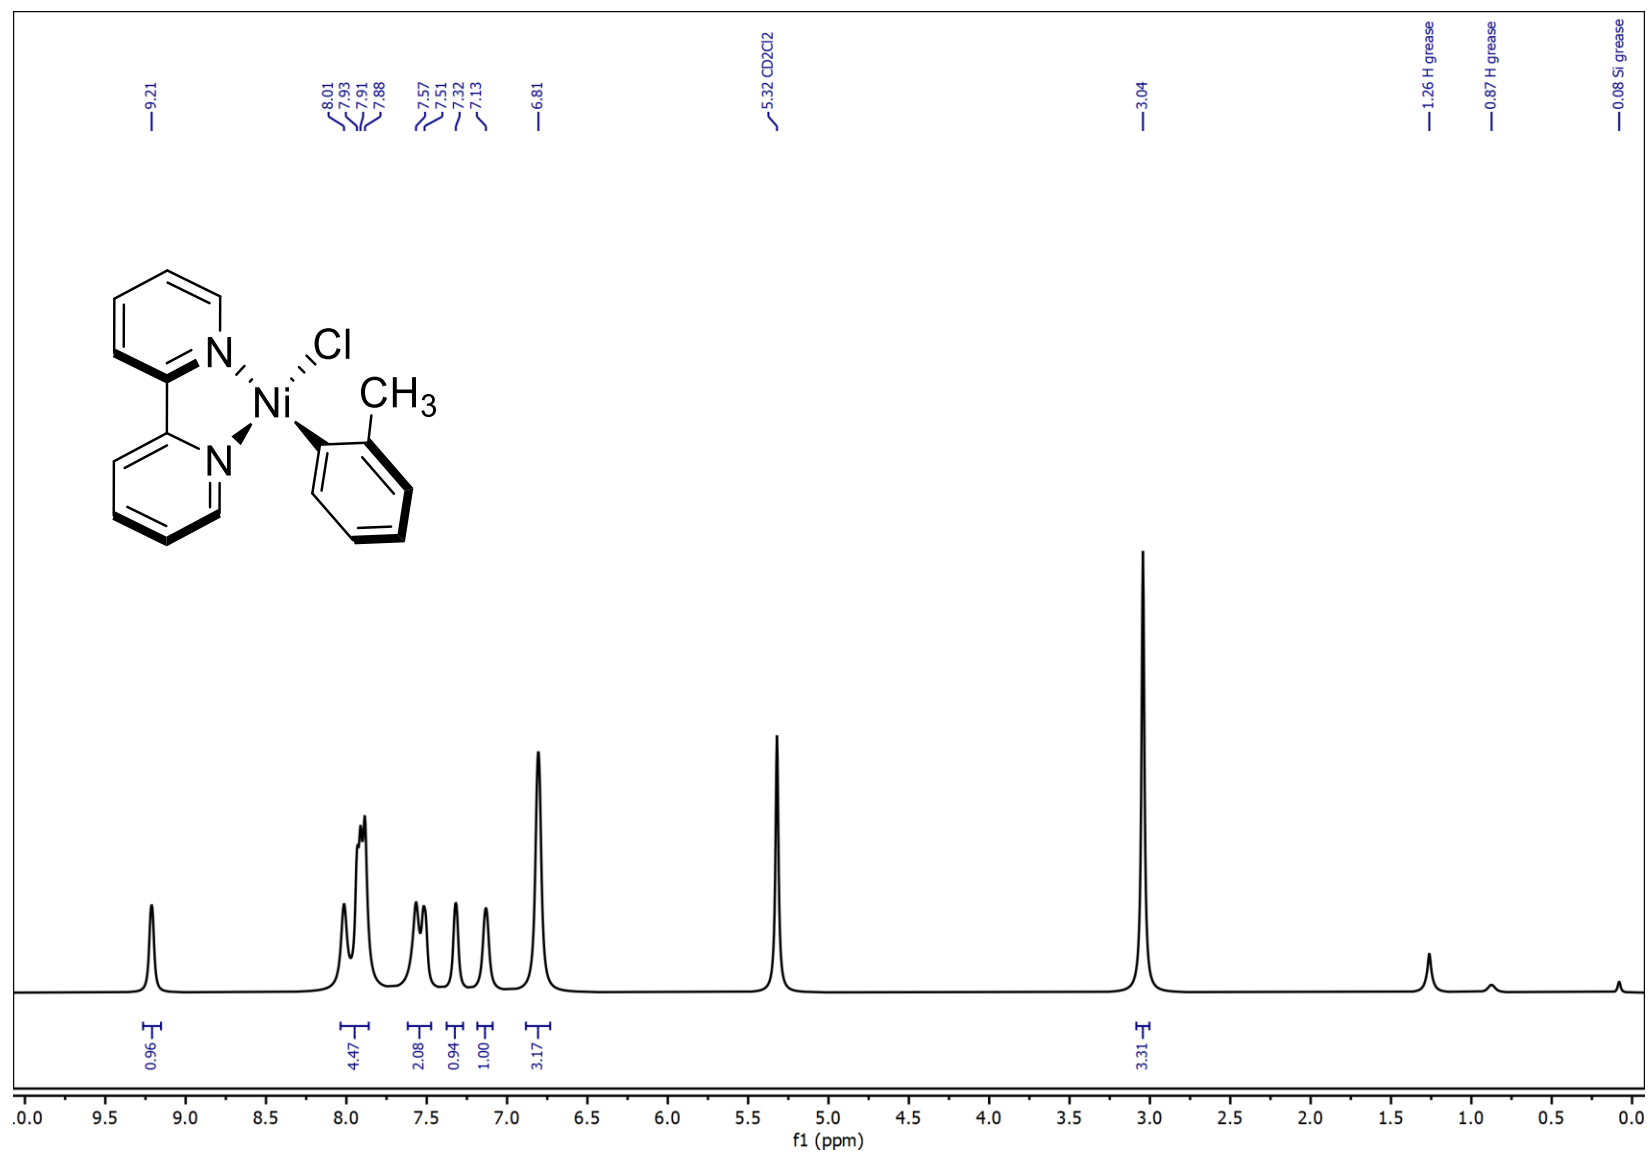

**$^{13}\text{C}$  NMR (100 MHz,  $\text{CD}_2\text{Cl}_2$ ):  $\text{Ni}(\text{Hbpy})(\text{CH}_3\text{Ph})\text{Cl}$ , 1C**

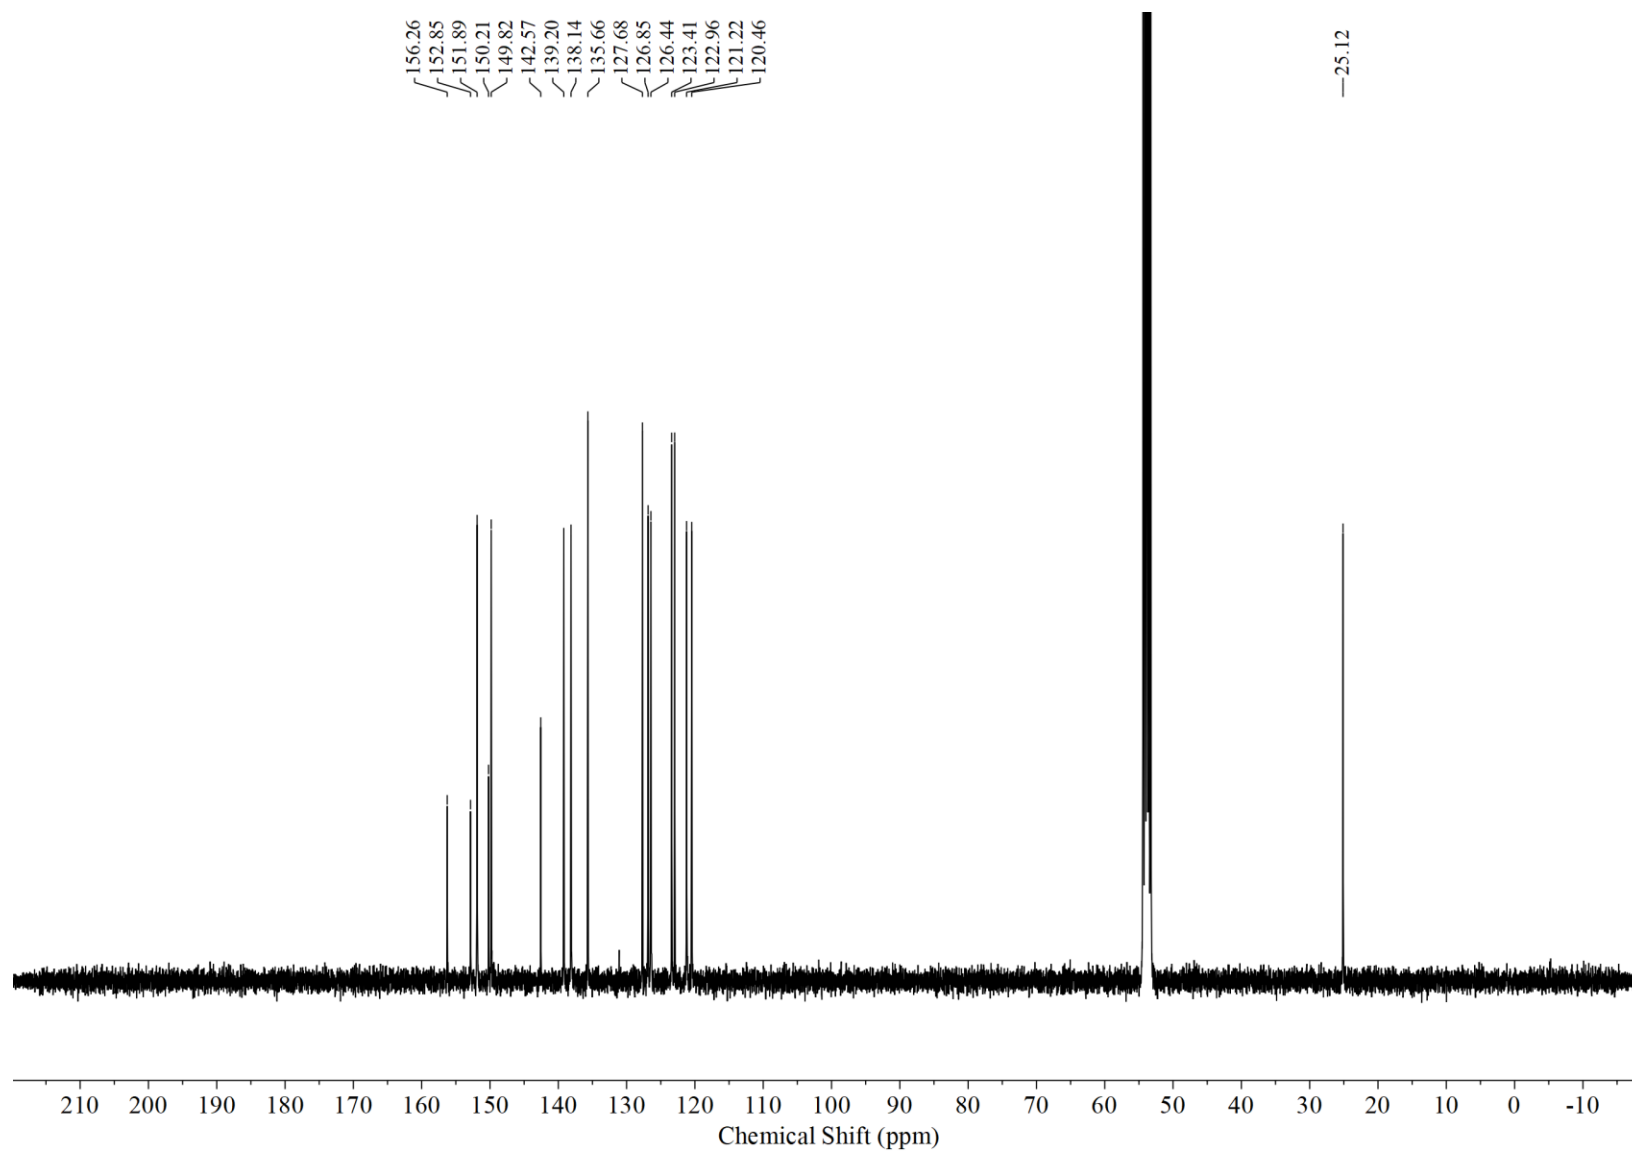

$^1\text{H}$  NMR (400 MHz,  $\text{CD}_2\text{Cl}_2$ ):  $\text{Ni}(\text{MeOOCbpy})(\text{CH}_3\text{Ph})\text{Cl}$ , 1D

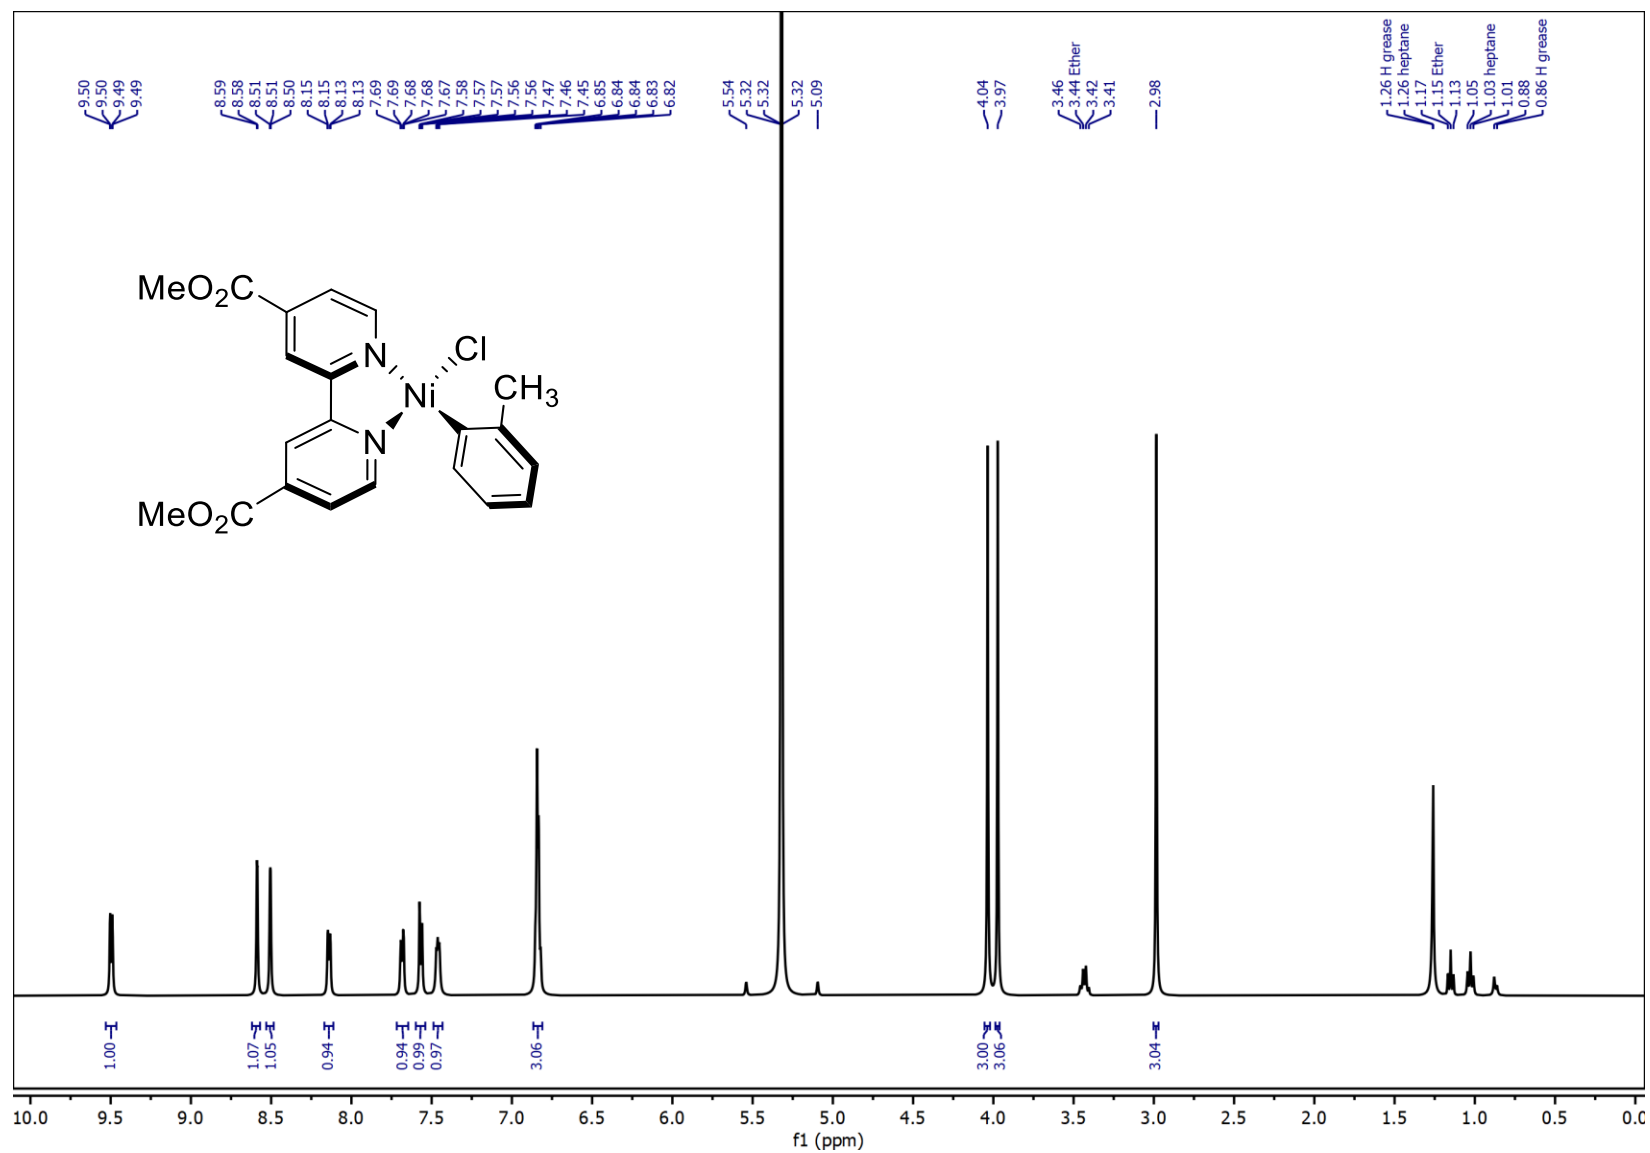

**$^{13}\text{C}$  NMR (100 MHz,  $\text{CD}_2\text{Cl}_2$ ):  $\text{Ni}(\text{MeOOCbpy})(\text{CH}_3\text{Ph})\text{Cl}$ , 1D**

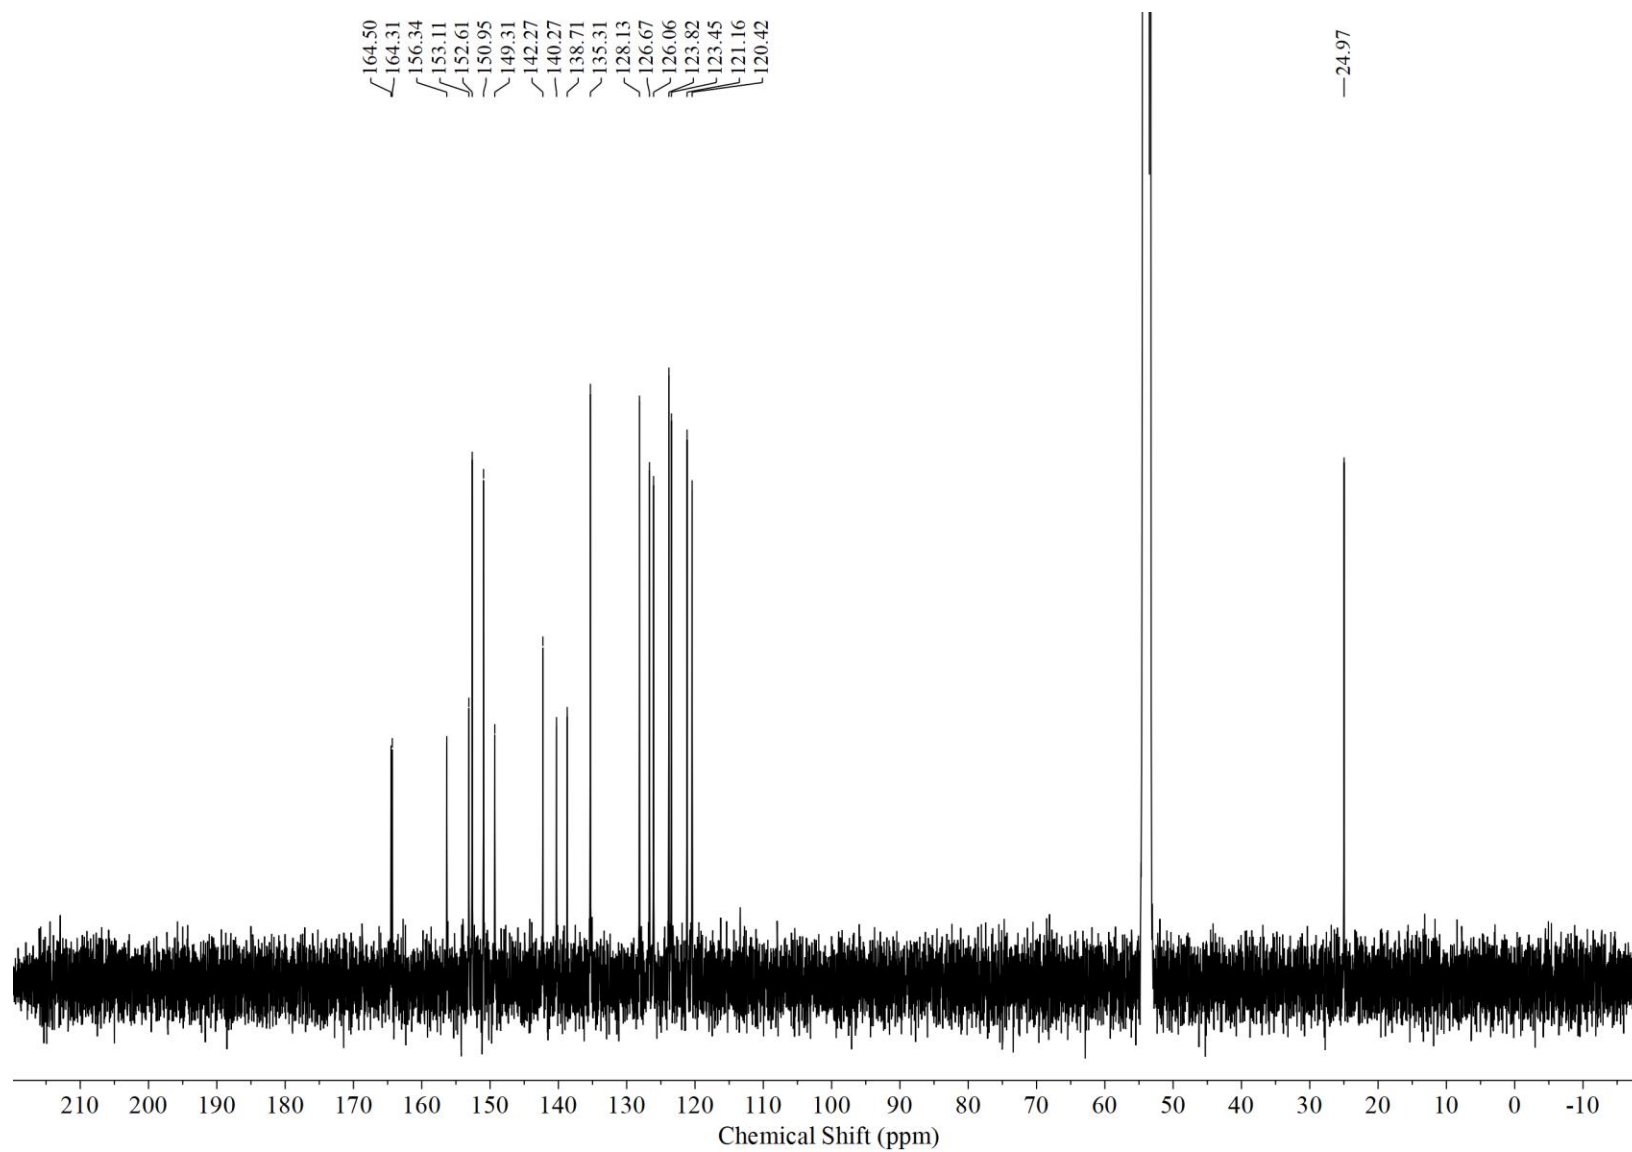

$^1\text{H}$  NMR (400 MHz,  $\text{CD}_2\text{Cl}_2$ ):  $\text{Ni}(\text{t-Bu}^2\text{bpy})(\text{Ph})\text{Cl}$ , 2B

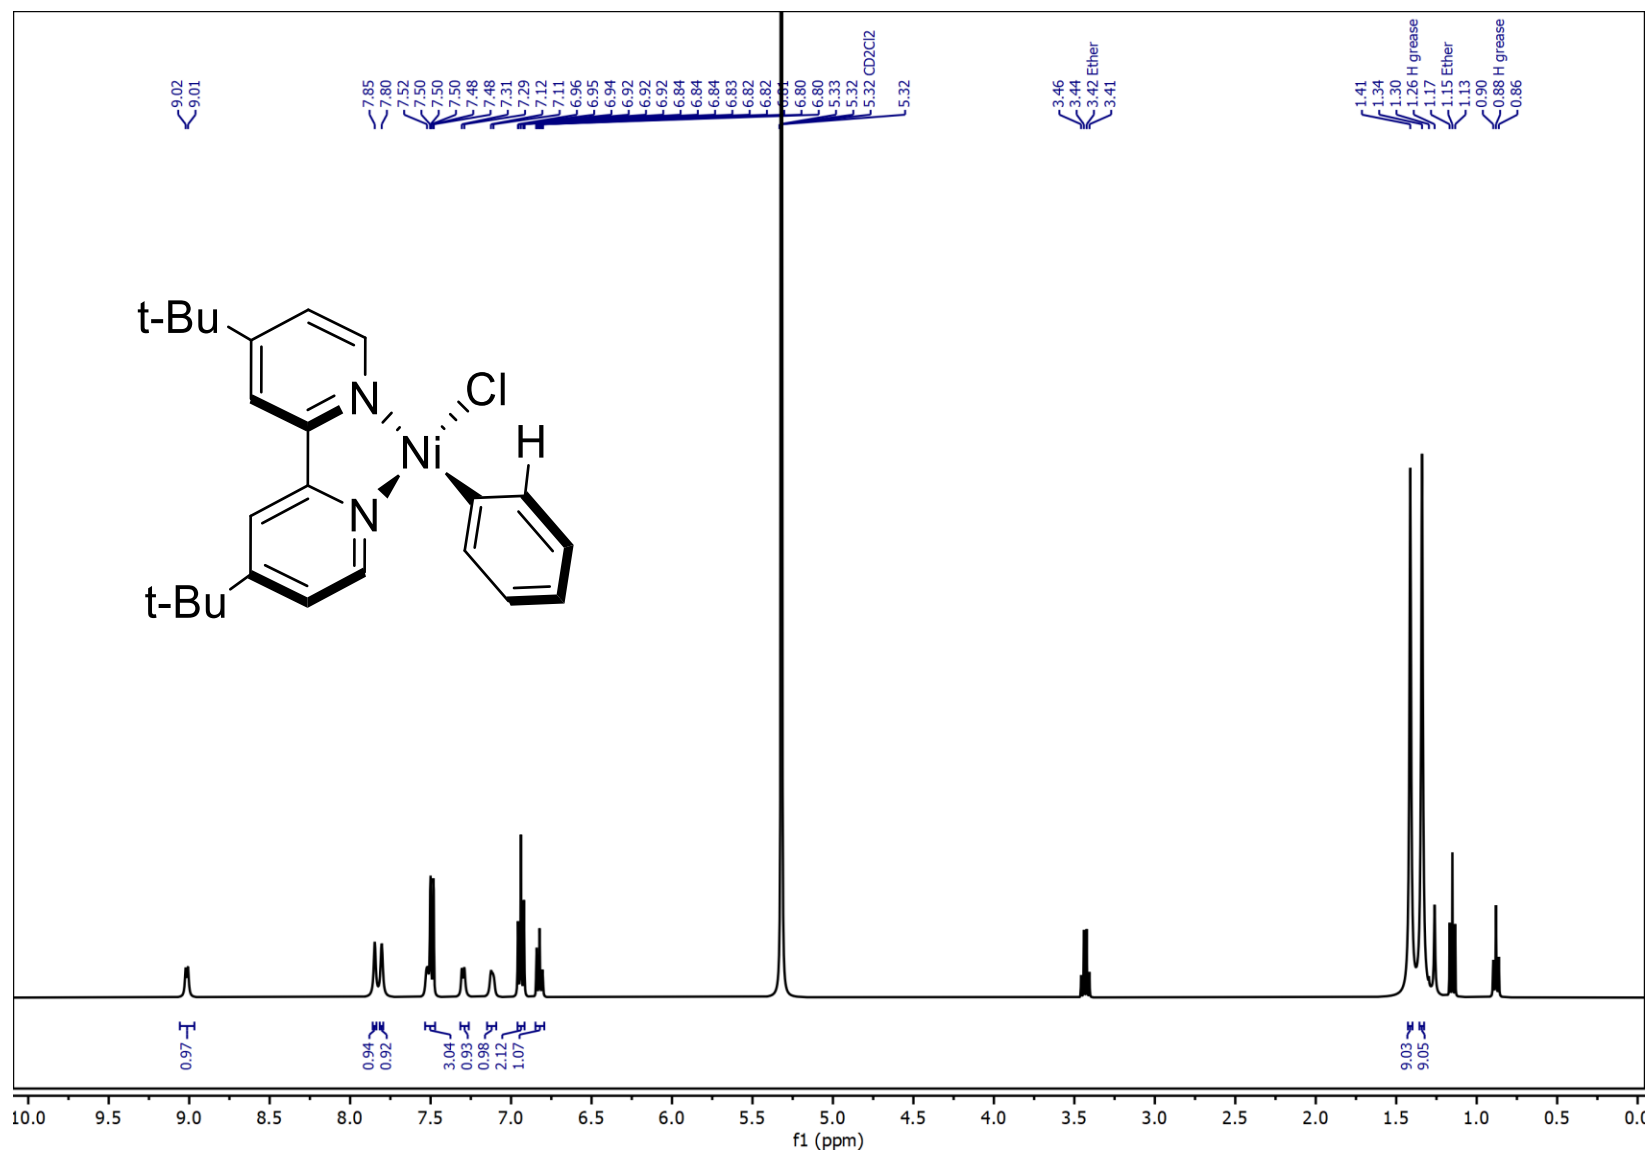

**$^{13}\text{C}$  NMR (100 MHz,  $\text{CD}_2\text{Cl}_2$ ): Ni(<sup>t</sup>-Bu<sub>3</sub>py)(Ph)Cl, 2B**

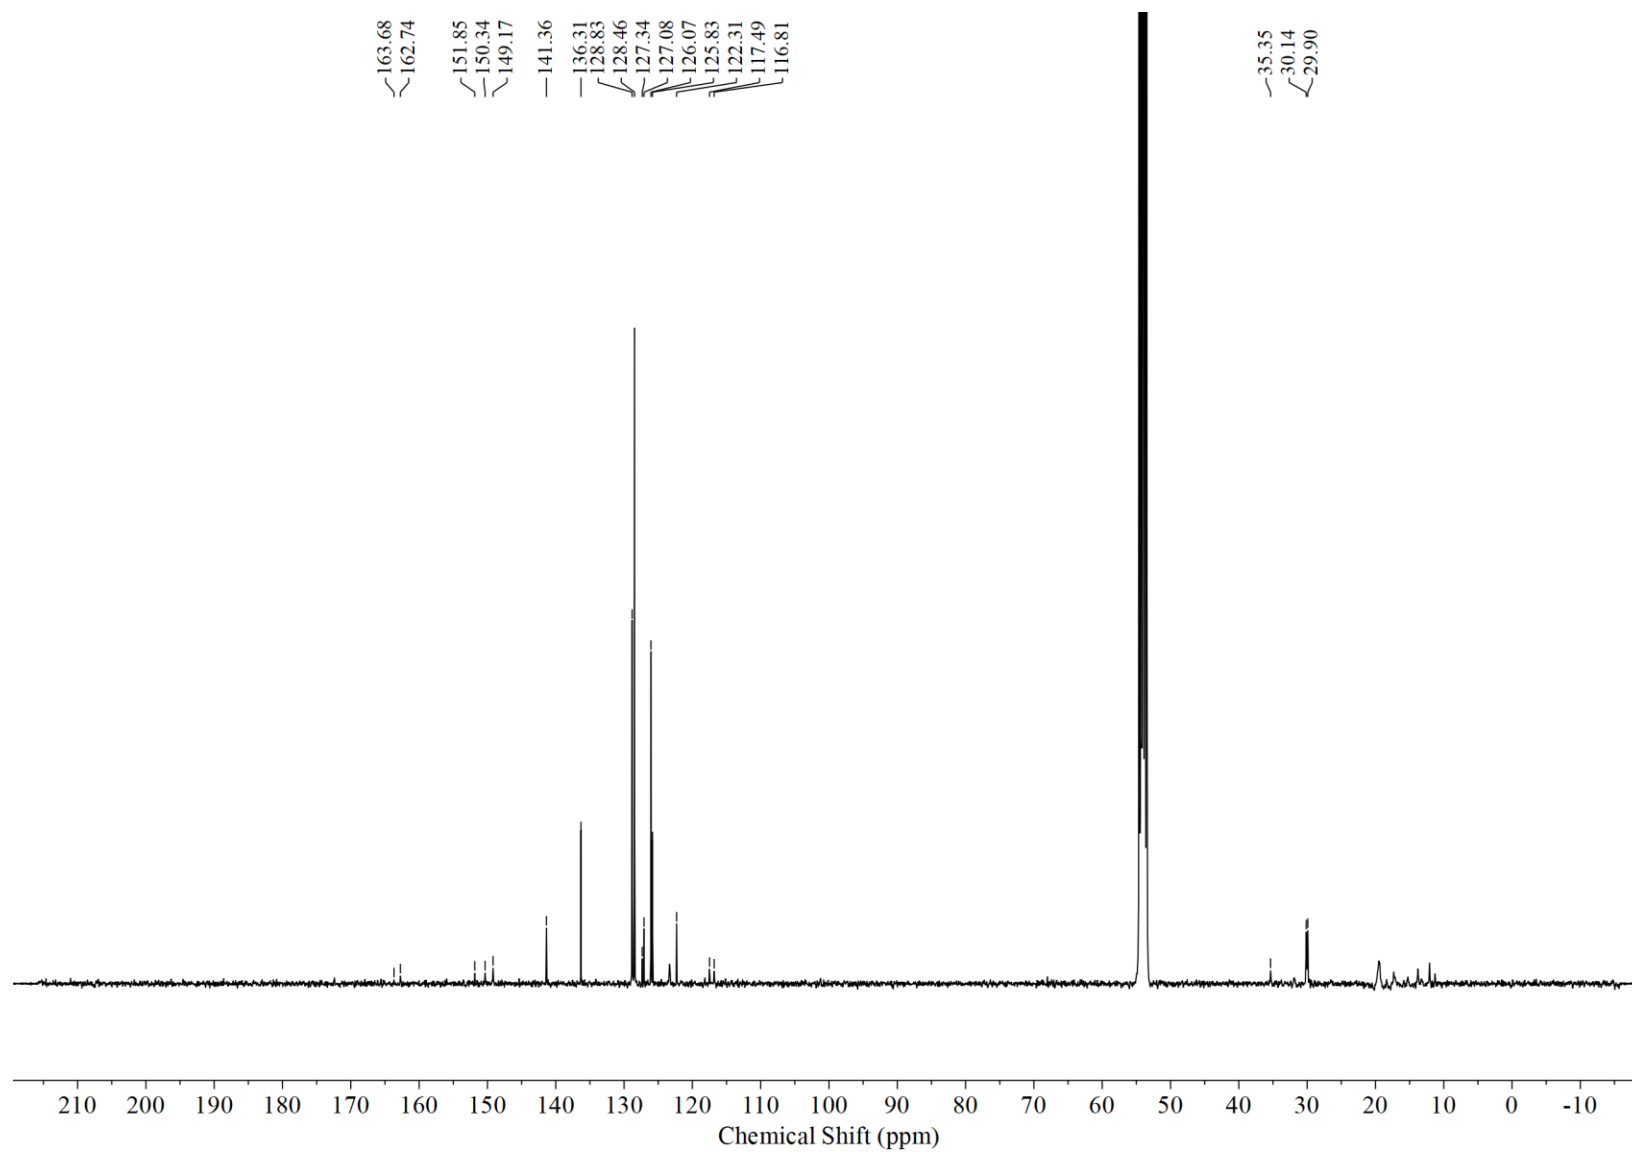



<sup>1</sup>H NMR (400 MHz, CD<sub>2</sub>Cl<sub>2</sub>): Ni(<sup>t</sup>-Bu<sub>2</sub>py)(CH<sub>3</sub>OPh)Cl, 3B

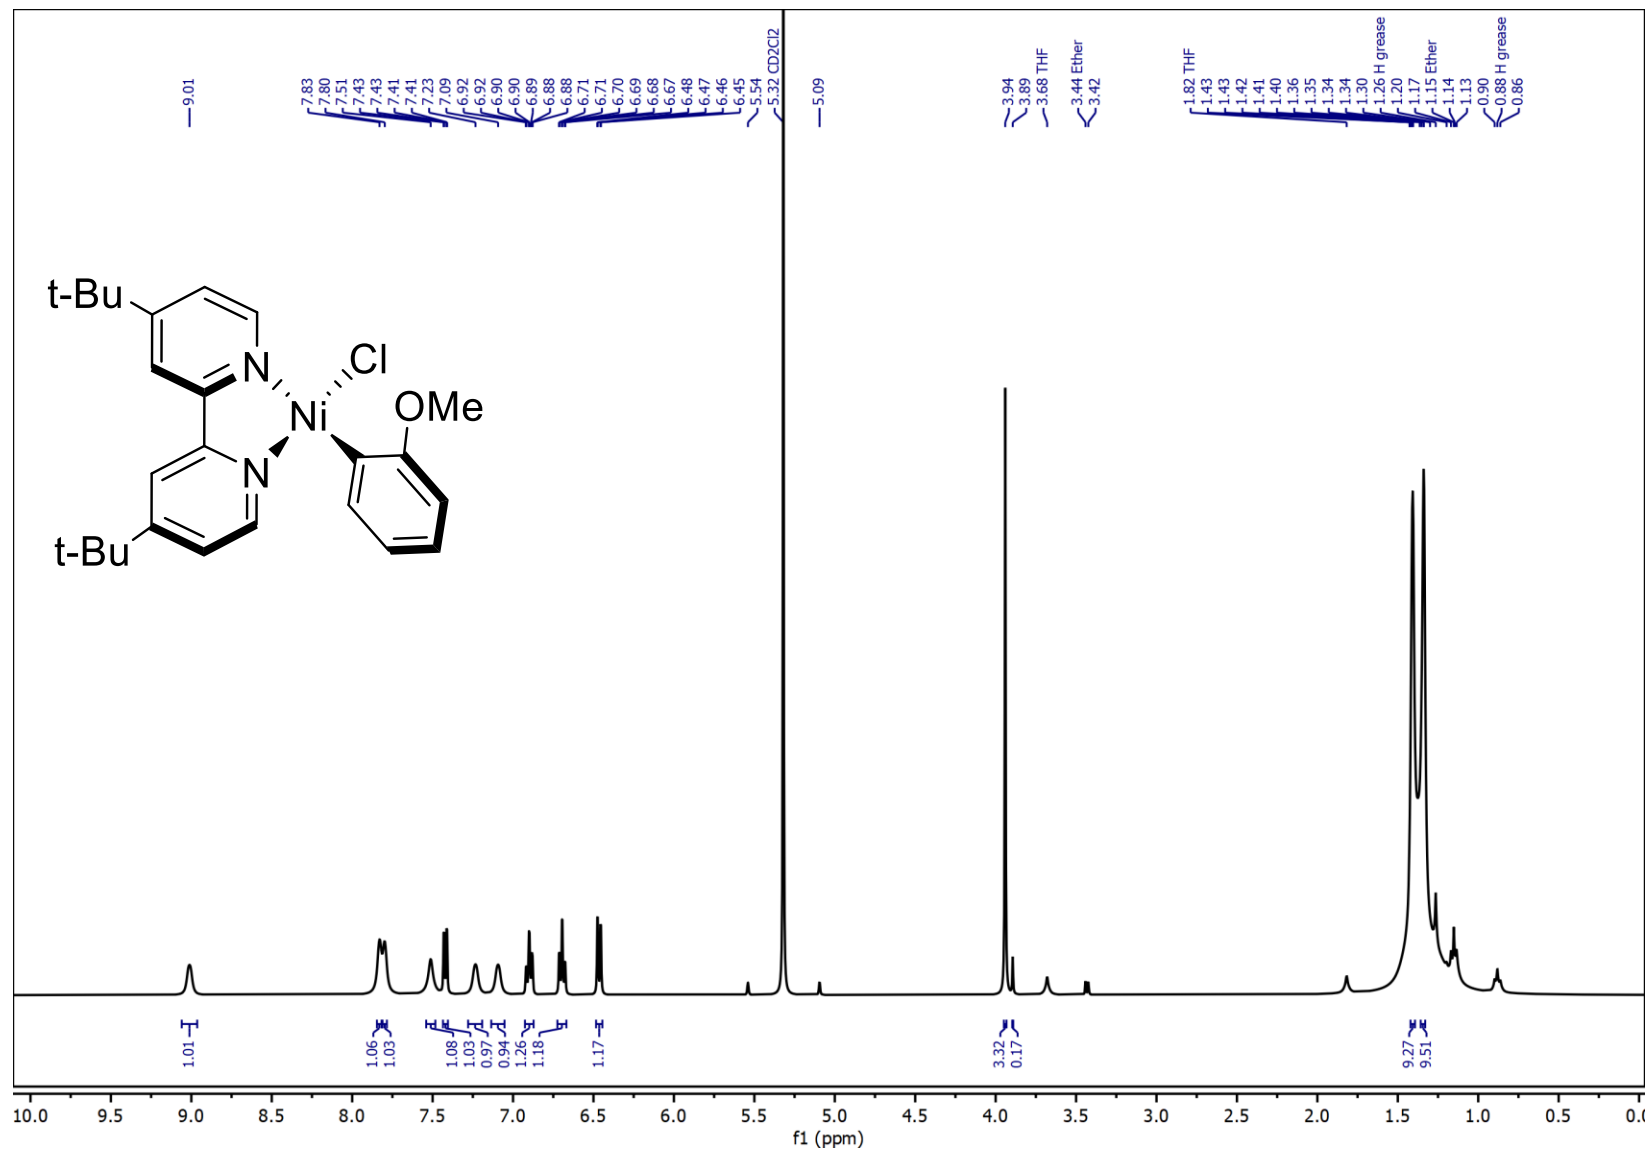

**$^{13}\text{C}$  NMR (100 MHz,  $\text{CD}_2\text{Cl}_2$ ):  $\text{Ni}(\text{t-Bu}^i\text{bpy})(\text{CH}_3\text{OPh})\text{Cl}$ , **3B****

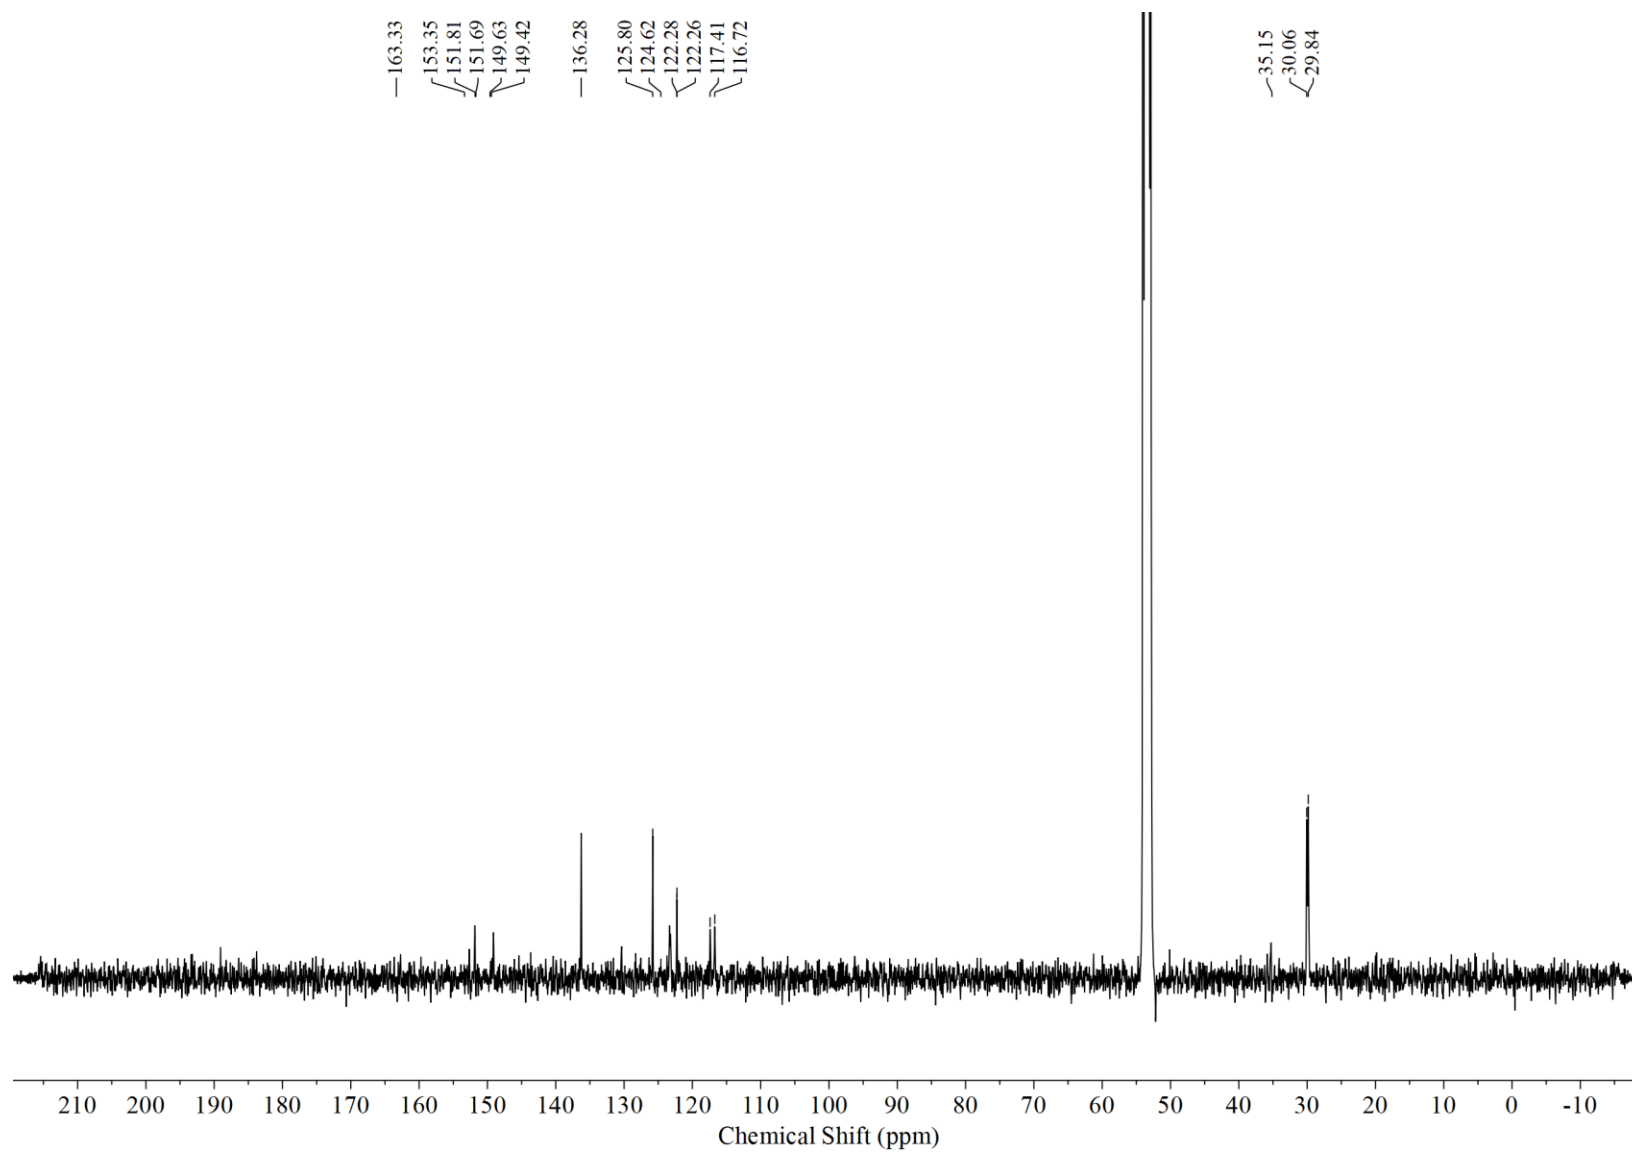

$^1\text{H}$  NMR (400 MHz,  $\text{CD}_2\text{Cl}_2$ ):  $\text{Ni}(\text{t-Bu}^2\text{bpy})(\text{F-Ph})\text{Cl}$ , 4B

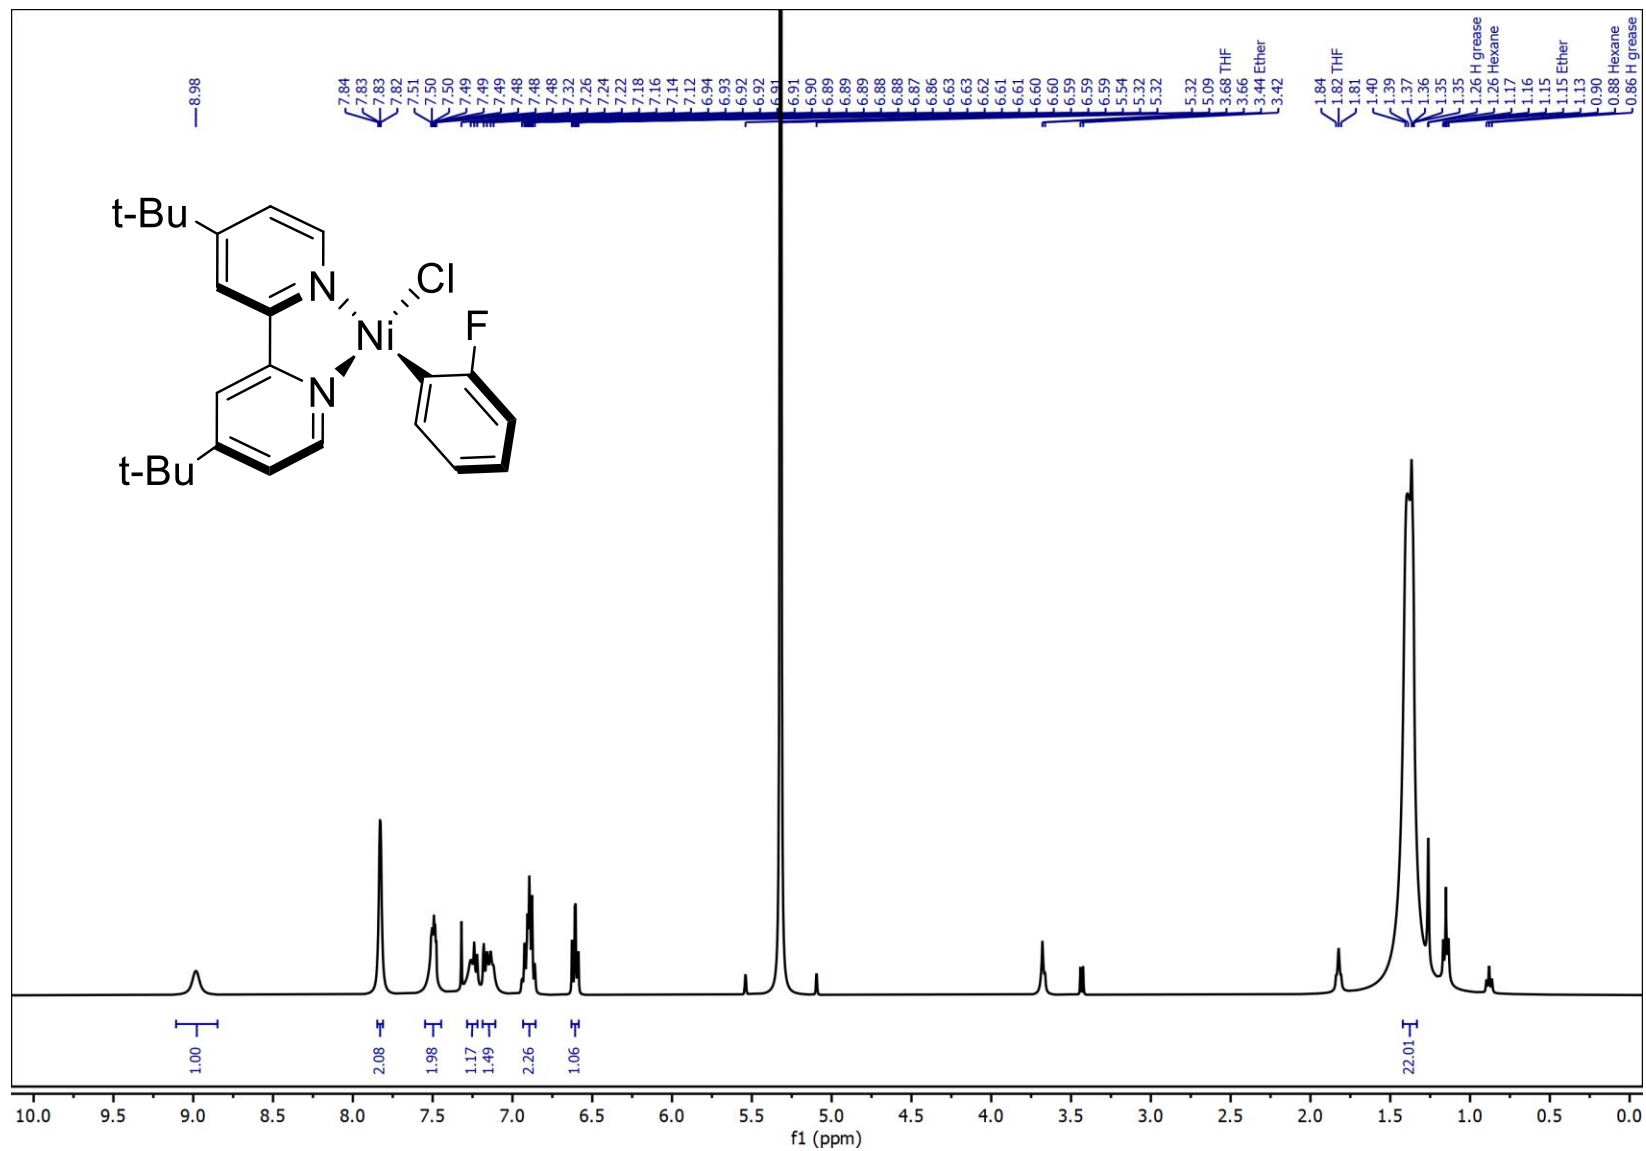

**$^{13}\text{C}$  NMR (100 MHz,  $\text{CD}_2\text{Cl}_2$ ):  $\text{Ni}(\text{t-Bu}^i\text{bpy})(\text{F-Ph})\text{Cl}$ , 4B**

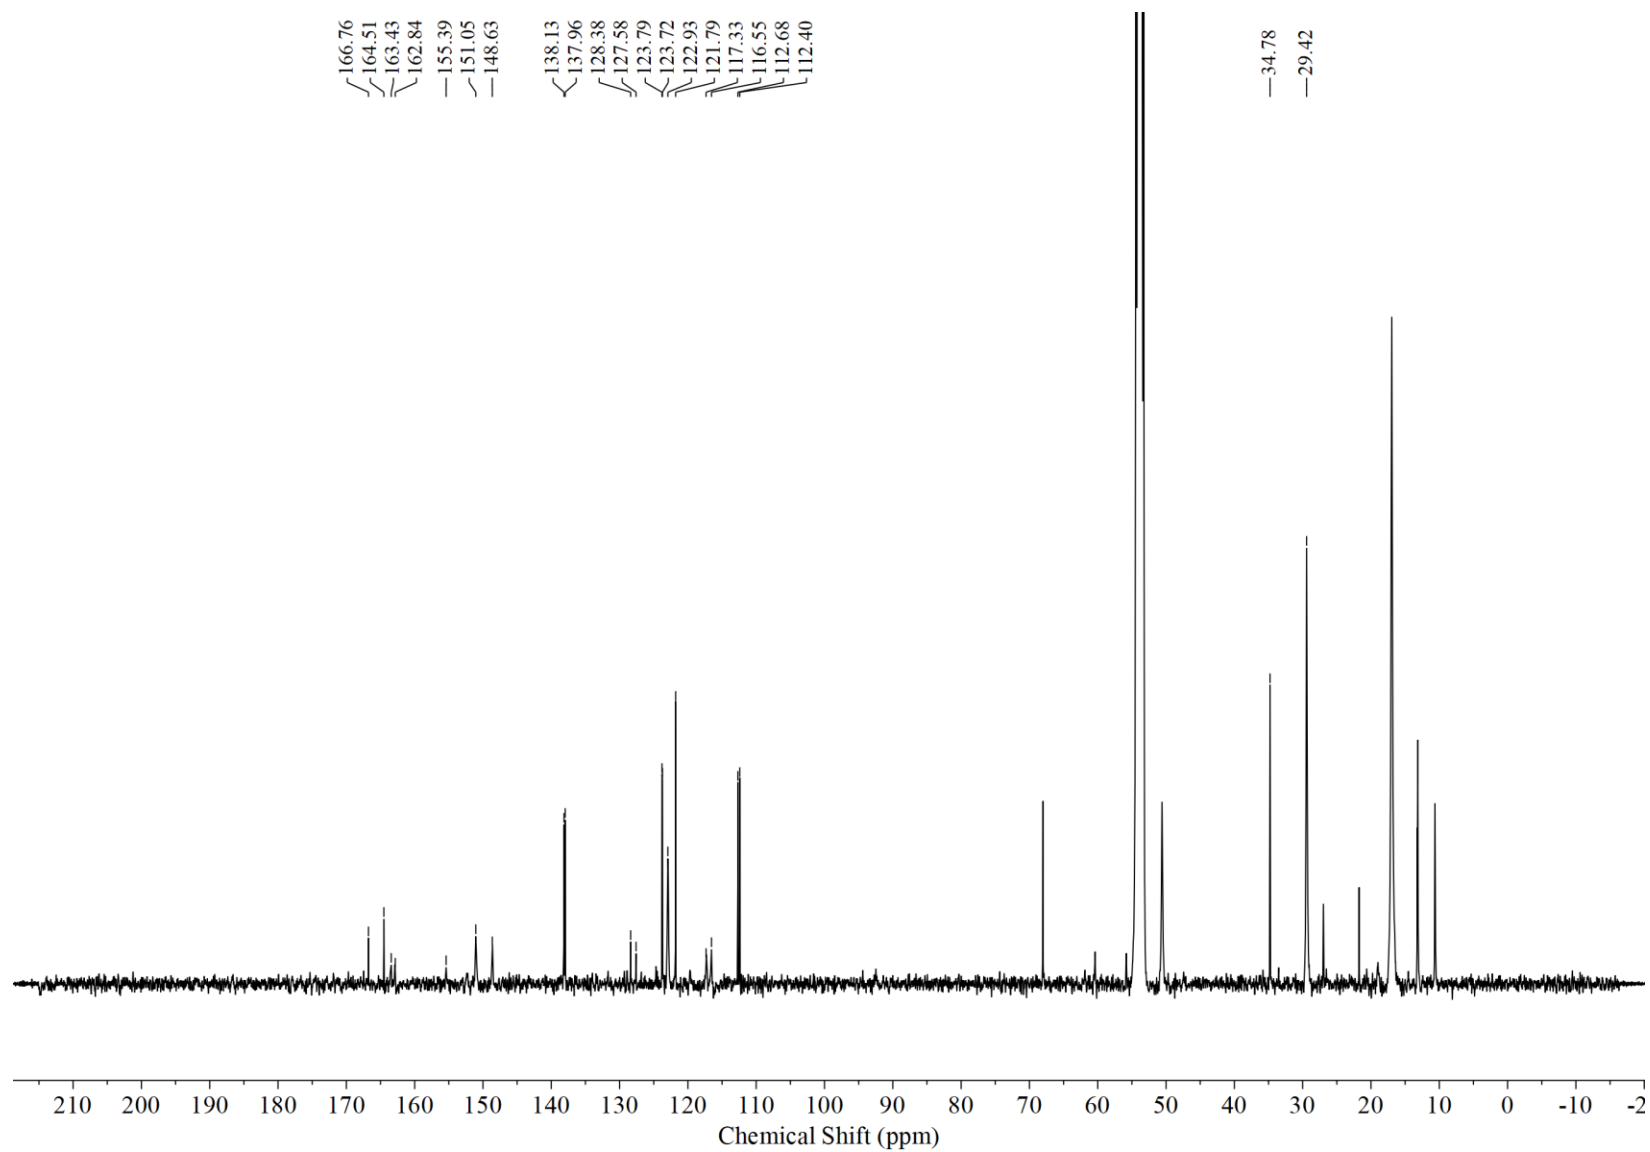

**$^1\text{H}$  NMR (400 MHz,  $\text{CD}_2\text{Cl}_2$ ):  $\text{Ni}(\text{MeO}^i\text{bpy})(\text{CF}_3\text{Ph})\text{Cl}$ , 5A**

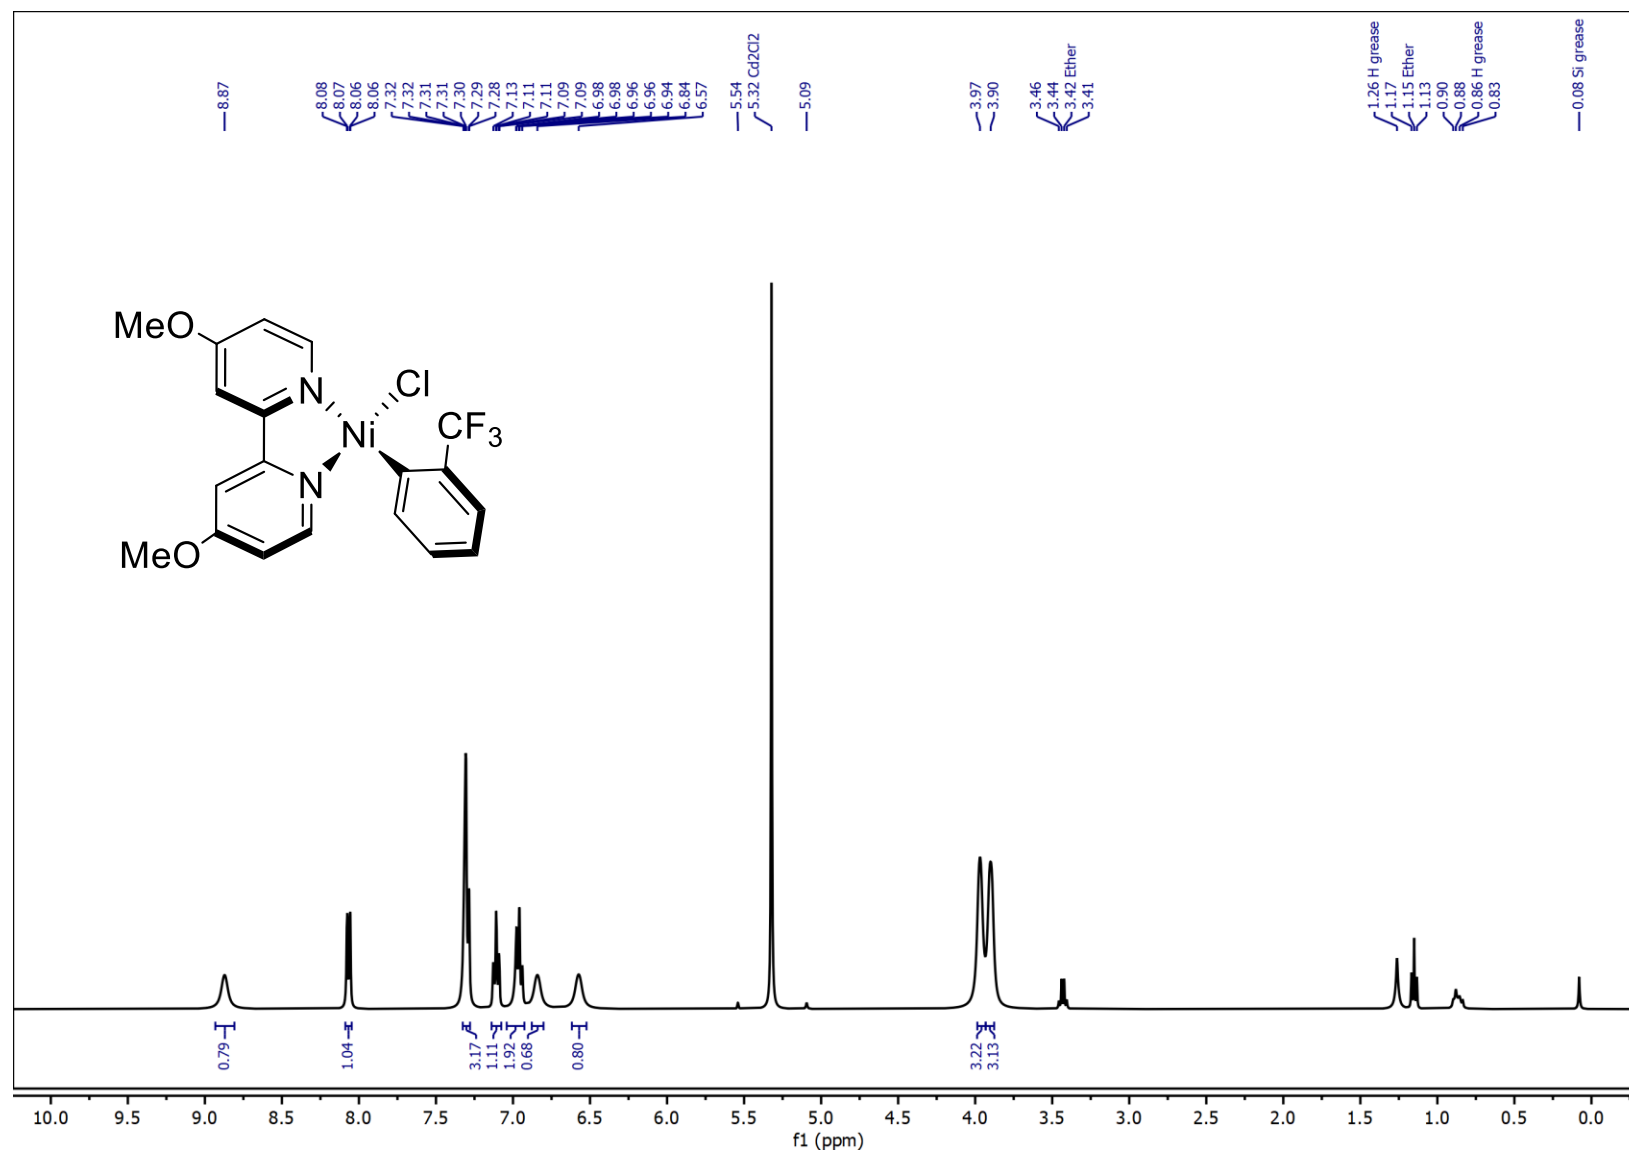

**$^{13}\text{C}$  NMR (100 MHz,  $\text{CD}_2\text{Cl}_2$ ):  $\text{Ni}(\text{MeO}bpy)(\text{CF}_3\text{Ph})\text{Cl}$ , 5A**

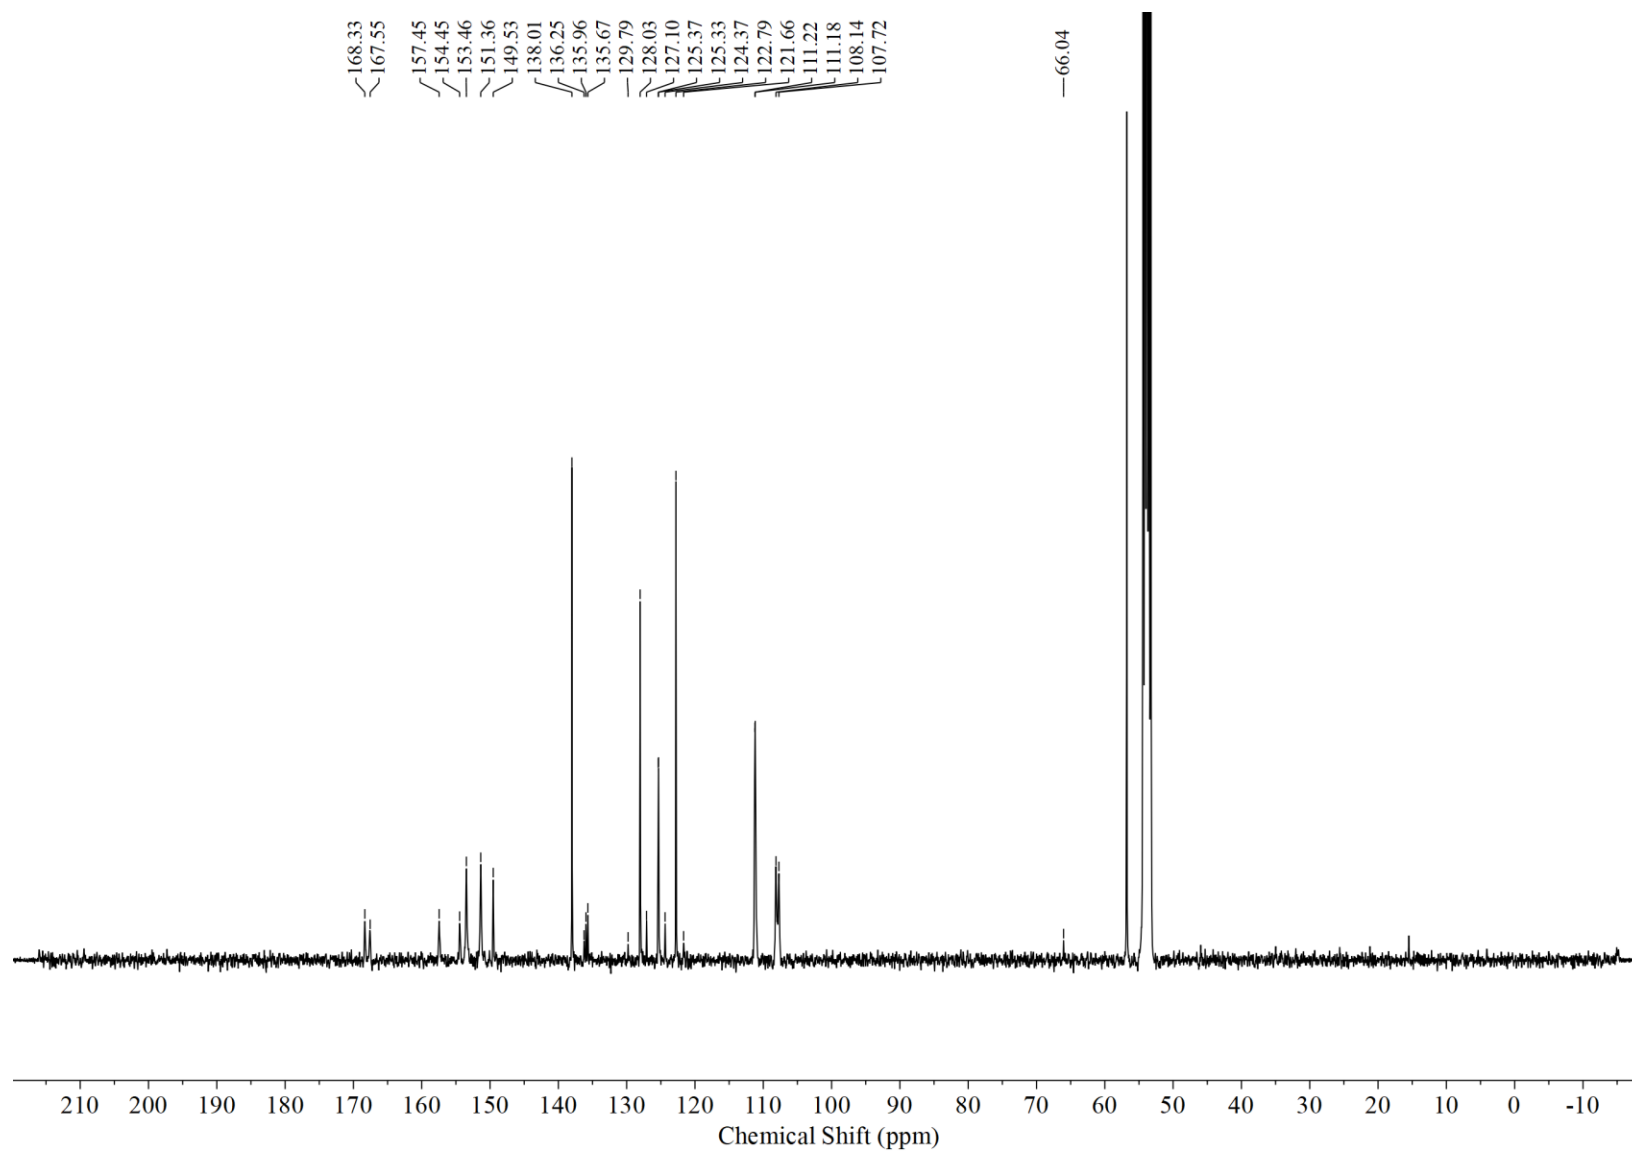

**<sup>1</sup>H NMR (400 MHz, CD<sub>2</sub>Cl<sub>2</sub>): Ni(<sup>t</sup>Bubpy)(CF<sub>3</sub>Ph)Cl, 5B**

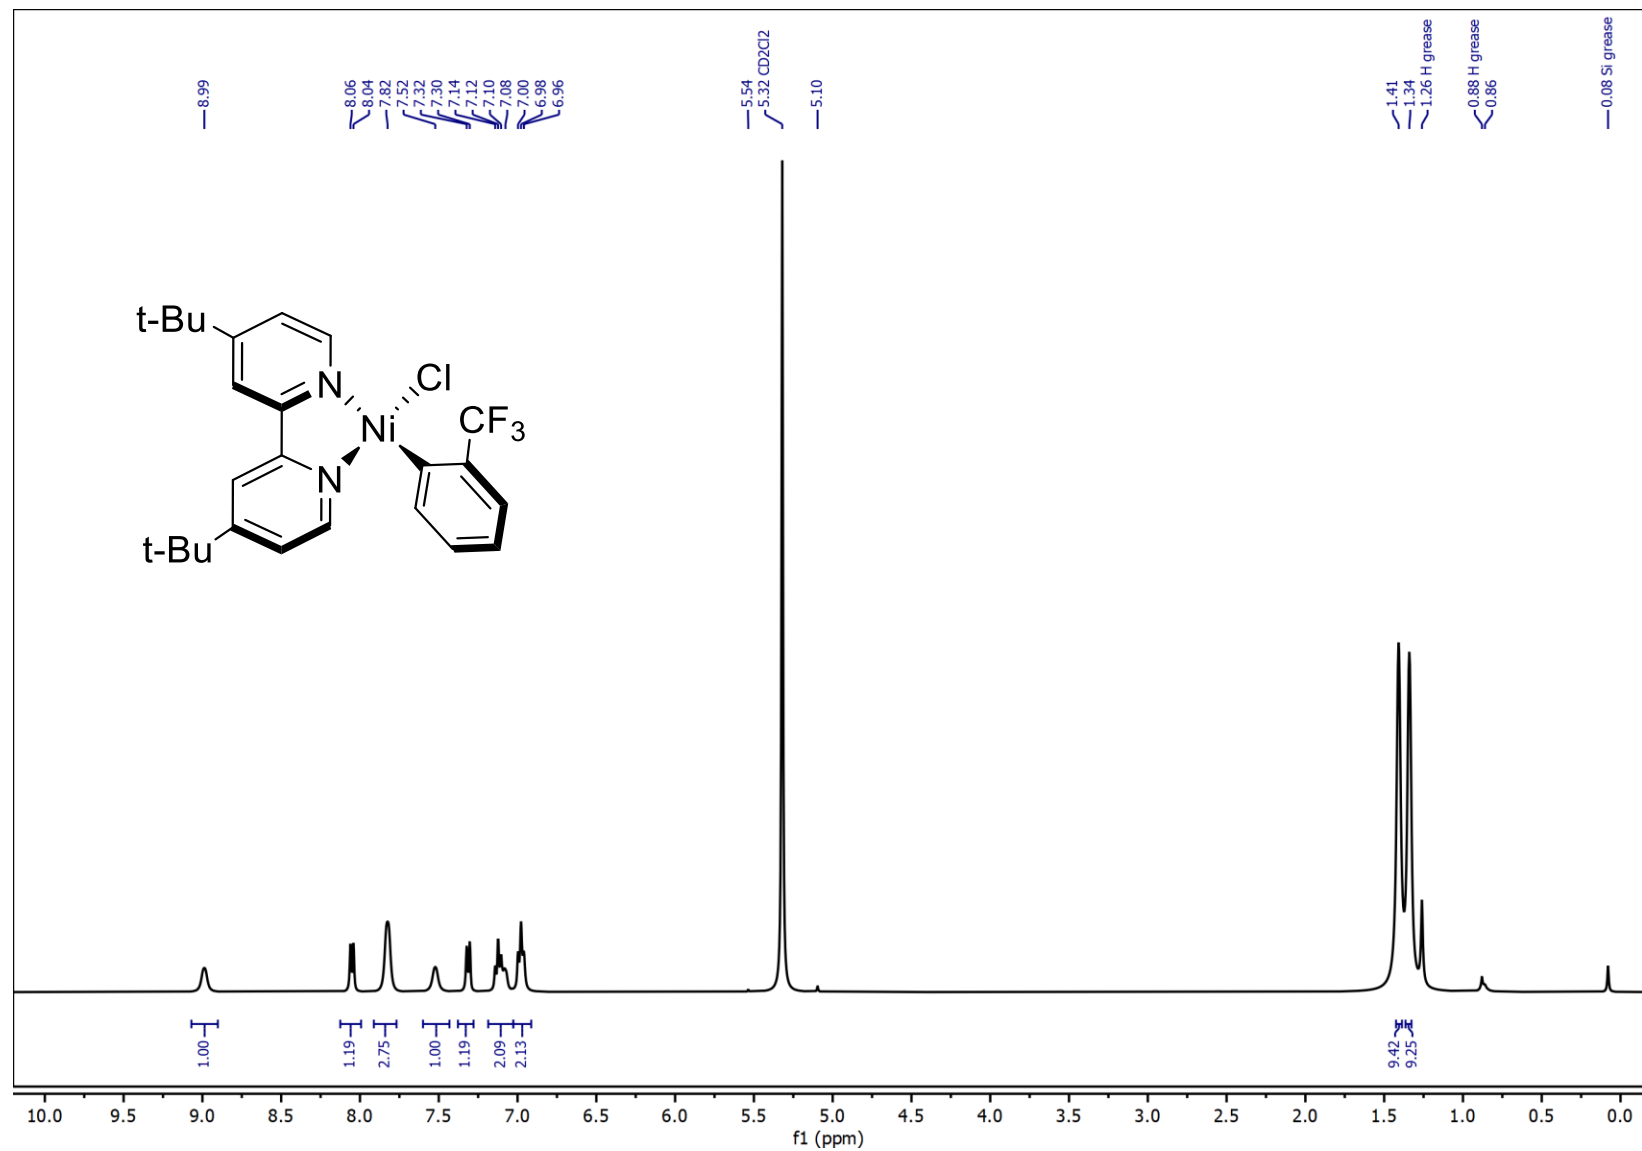

**$^{13}\text{C}$  NMR (100 MHz,  $\text{CD}_2\text{Cl}_2$ ):  $\text{Ni}(\text{}^t\text{Bu}^i\text{bpy})(\text{CF}_3\text{Ph})\text{Cl}$ , 5B**

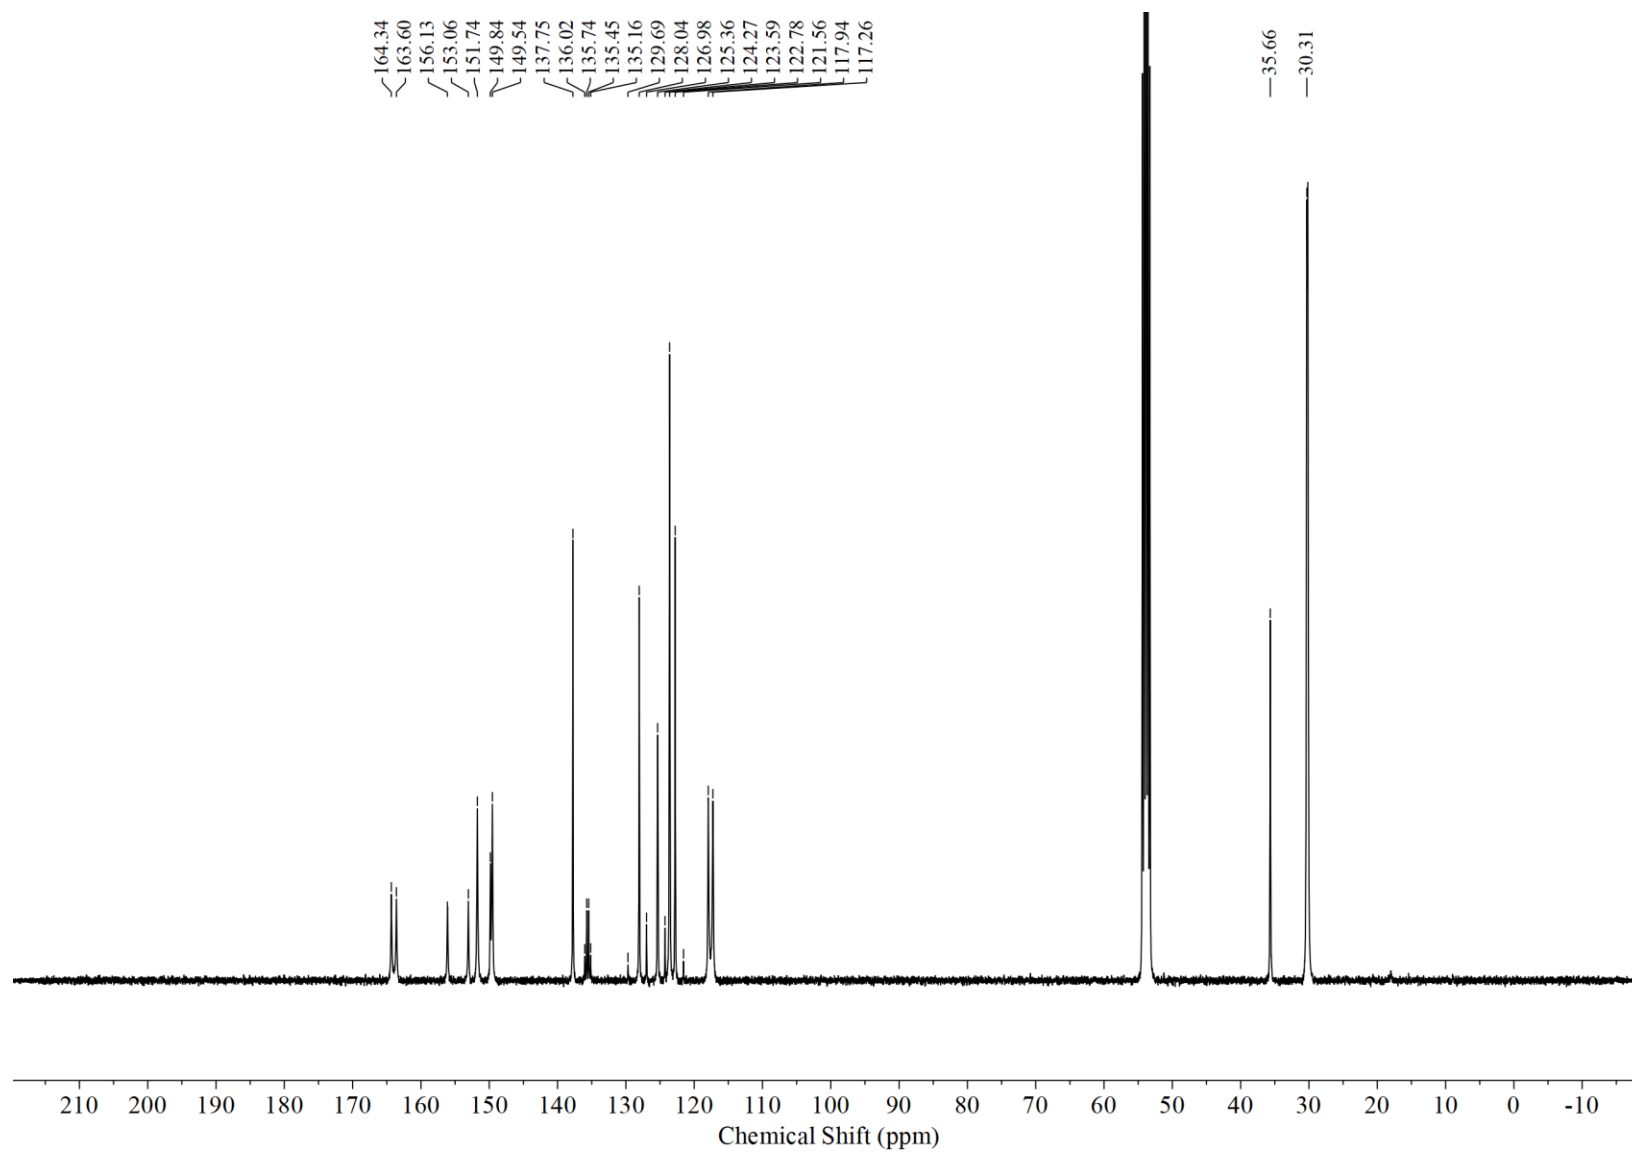



$^1\text{H}$  NMR (400 MHz,  $\text{CD}_2\text{Cl}_2$ ):  $\text{Ni}(\text{Hbpy})(\text{CF}_3\text{Ph})\text{Cl}$ , 5C

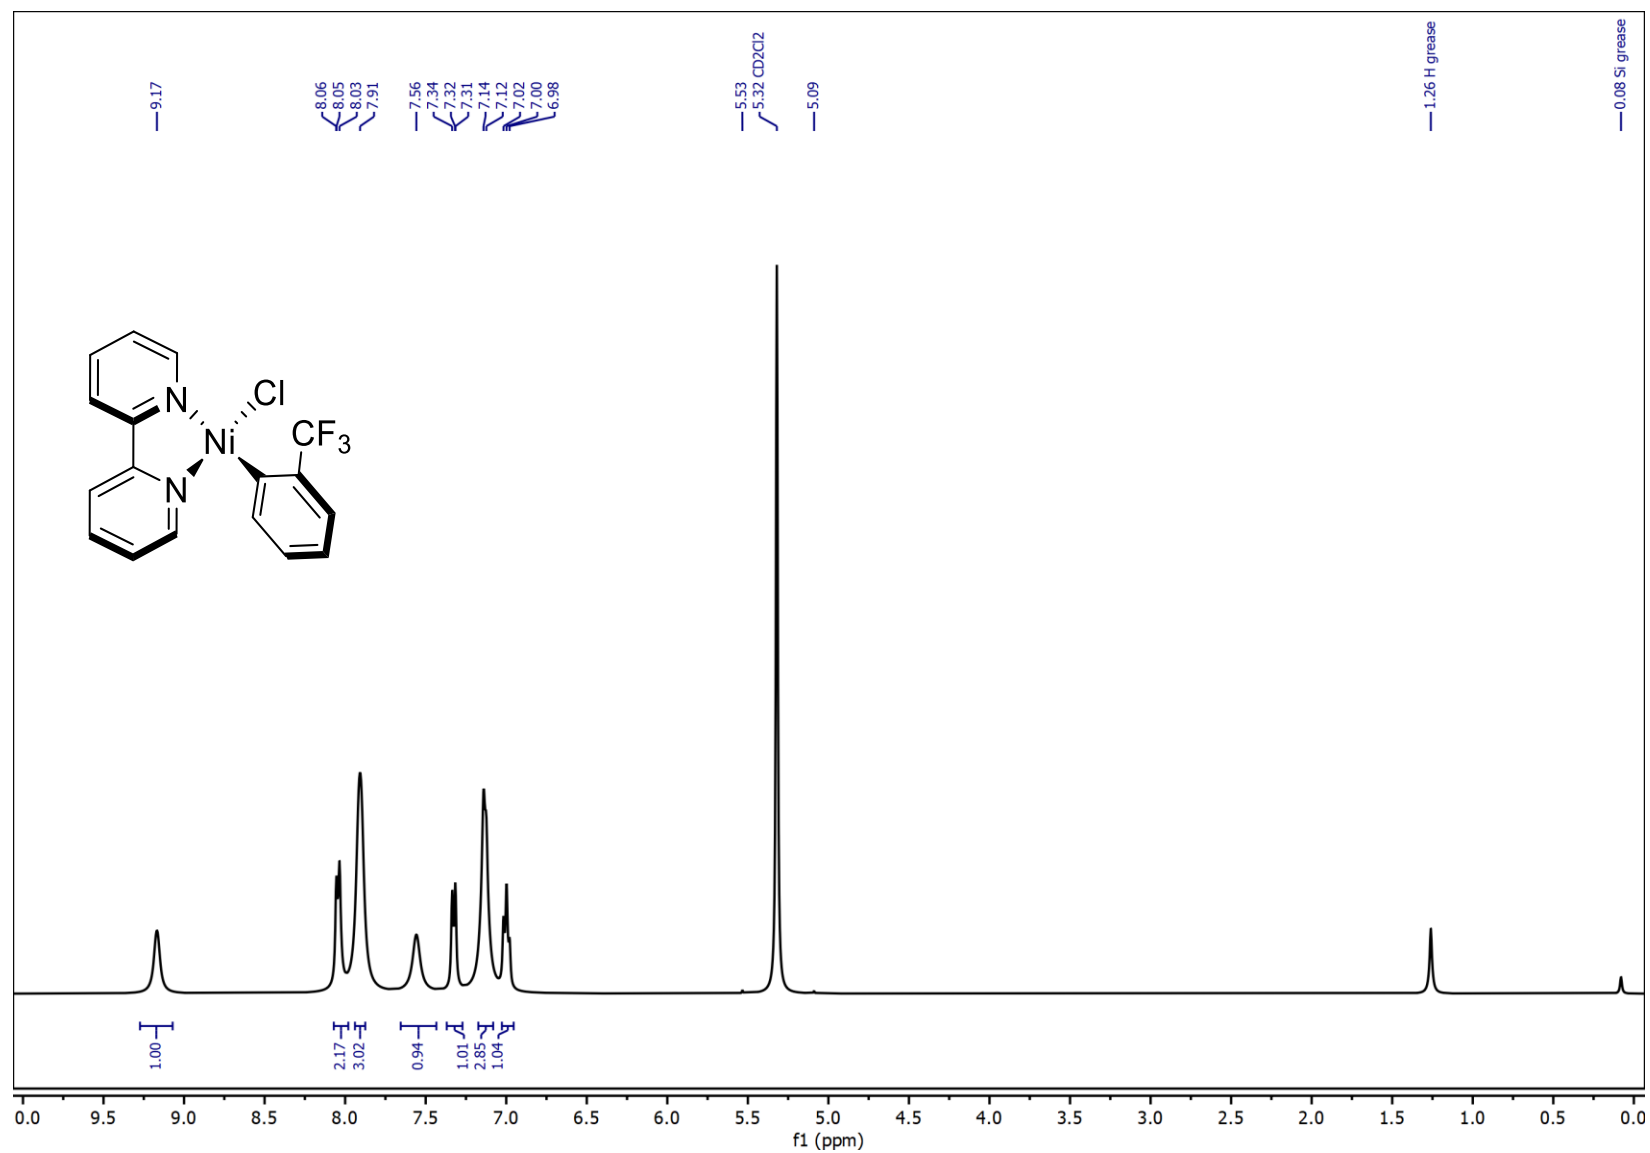

**$^{13}\text{C}$  NMR (100 MHz,  $\text{CD}_2\text{Cl}_2$ ):  $\text{Ni}(\text{Hbpy})(\text{CF}_3\text{Ph})\text{Cl}$ , 5C**

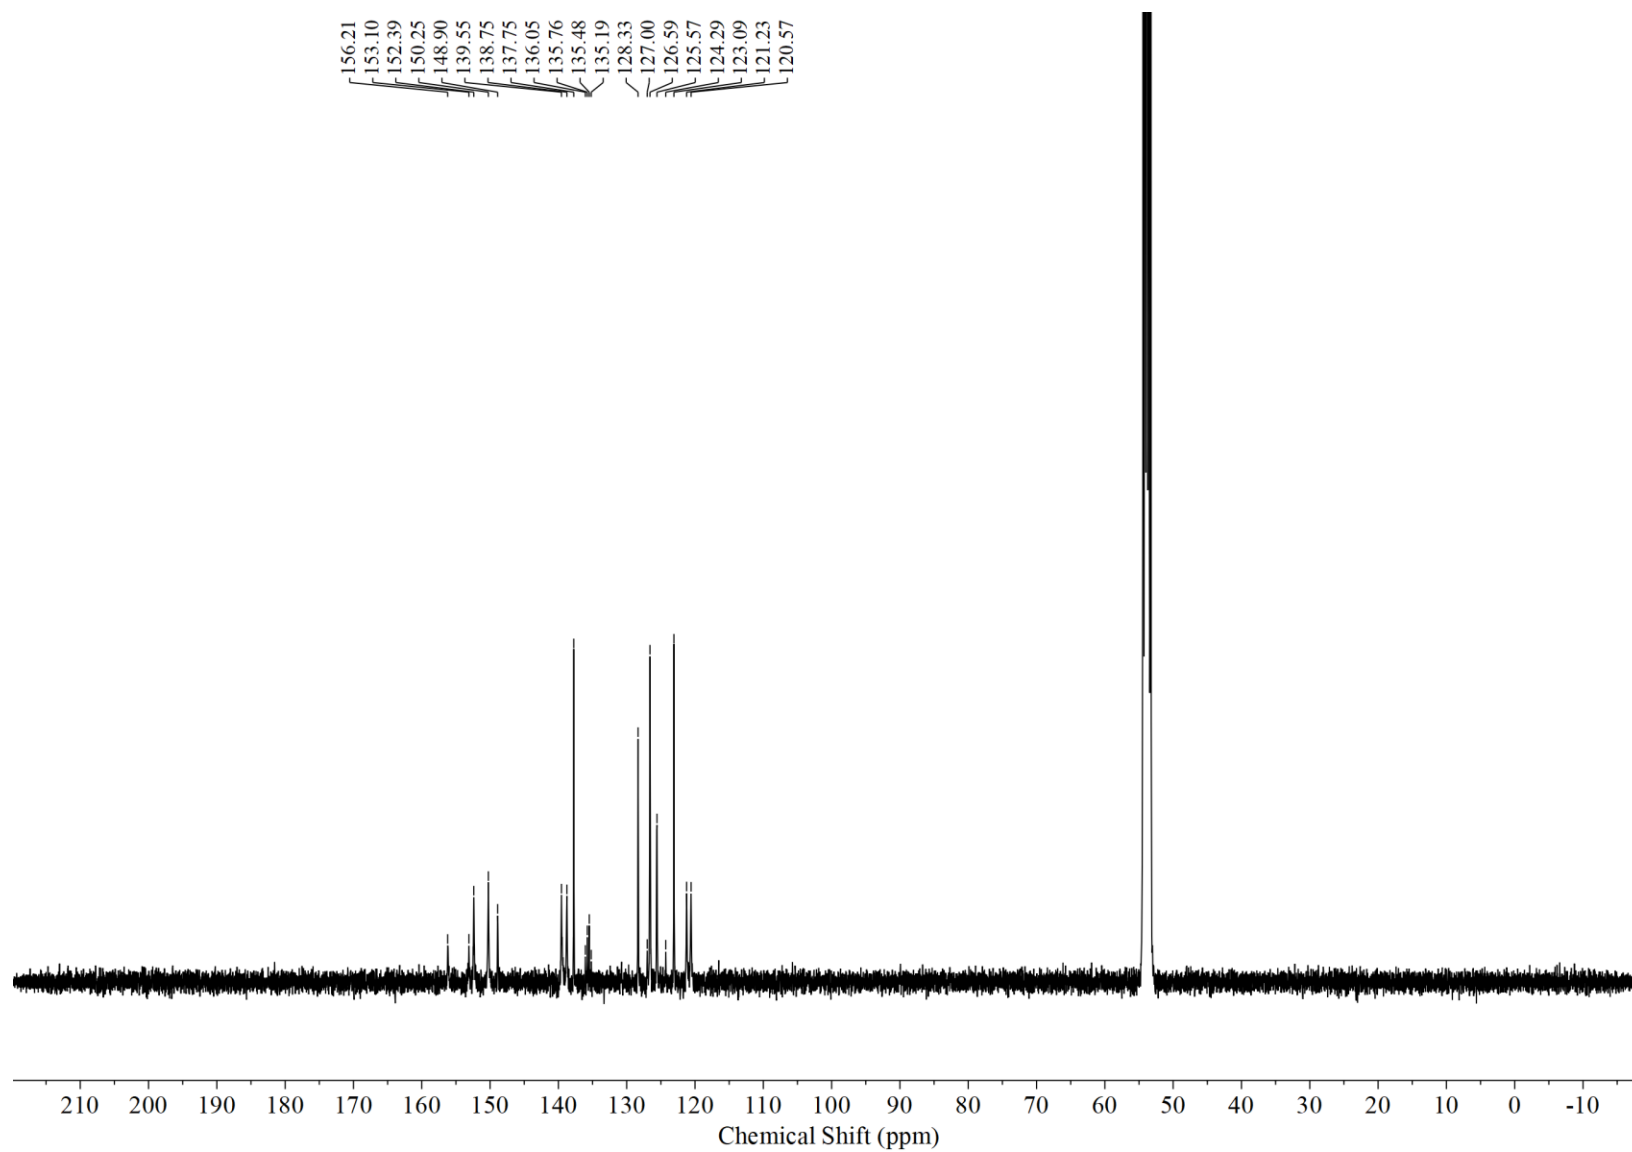

**$^1\text{H}$  NMR (400 MHz,  $\text{CD}_2\text{Cl}_2$ ):  $\text{Ni}(\text{MeOOCbpy})(\text{CF}_3\text{Ph})\text{Cl}$ , 5D**

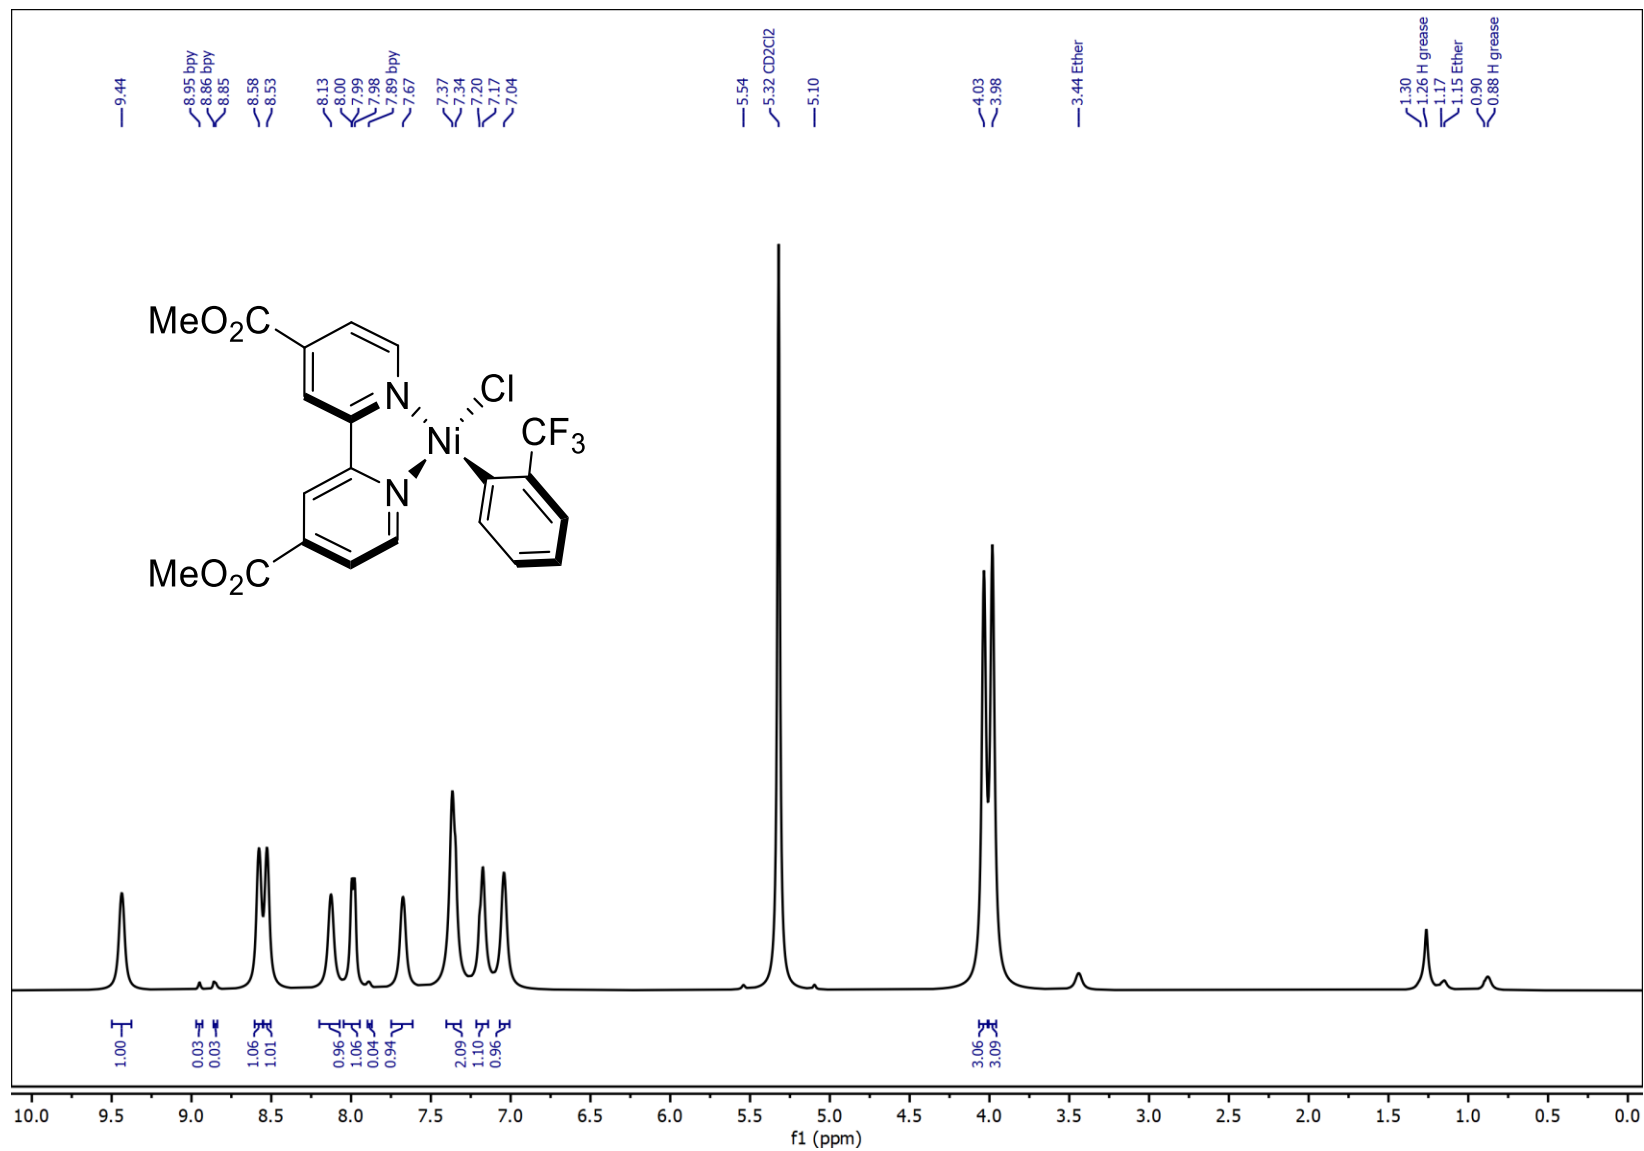

**$^{13}\text{C}$  NMR (100 MHz,  $\text{CD}_2\text{Cl}_2$ ):  $\text{Ni}(\text{MeOOCbpy})(\text{CF}_3\text{Ph})\text{Cl}$ , 5D**

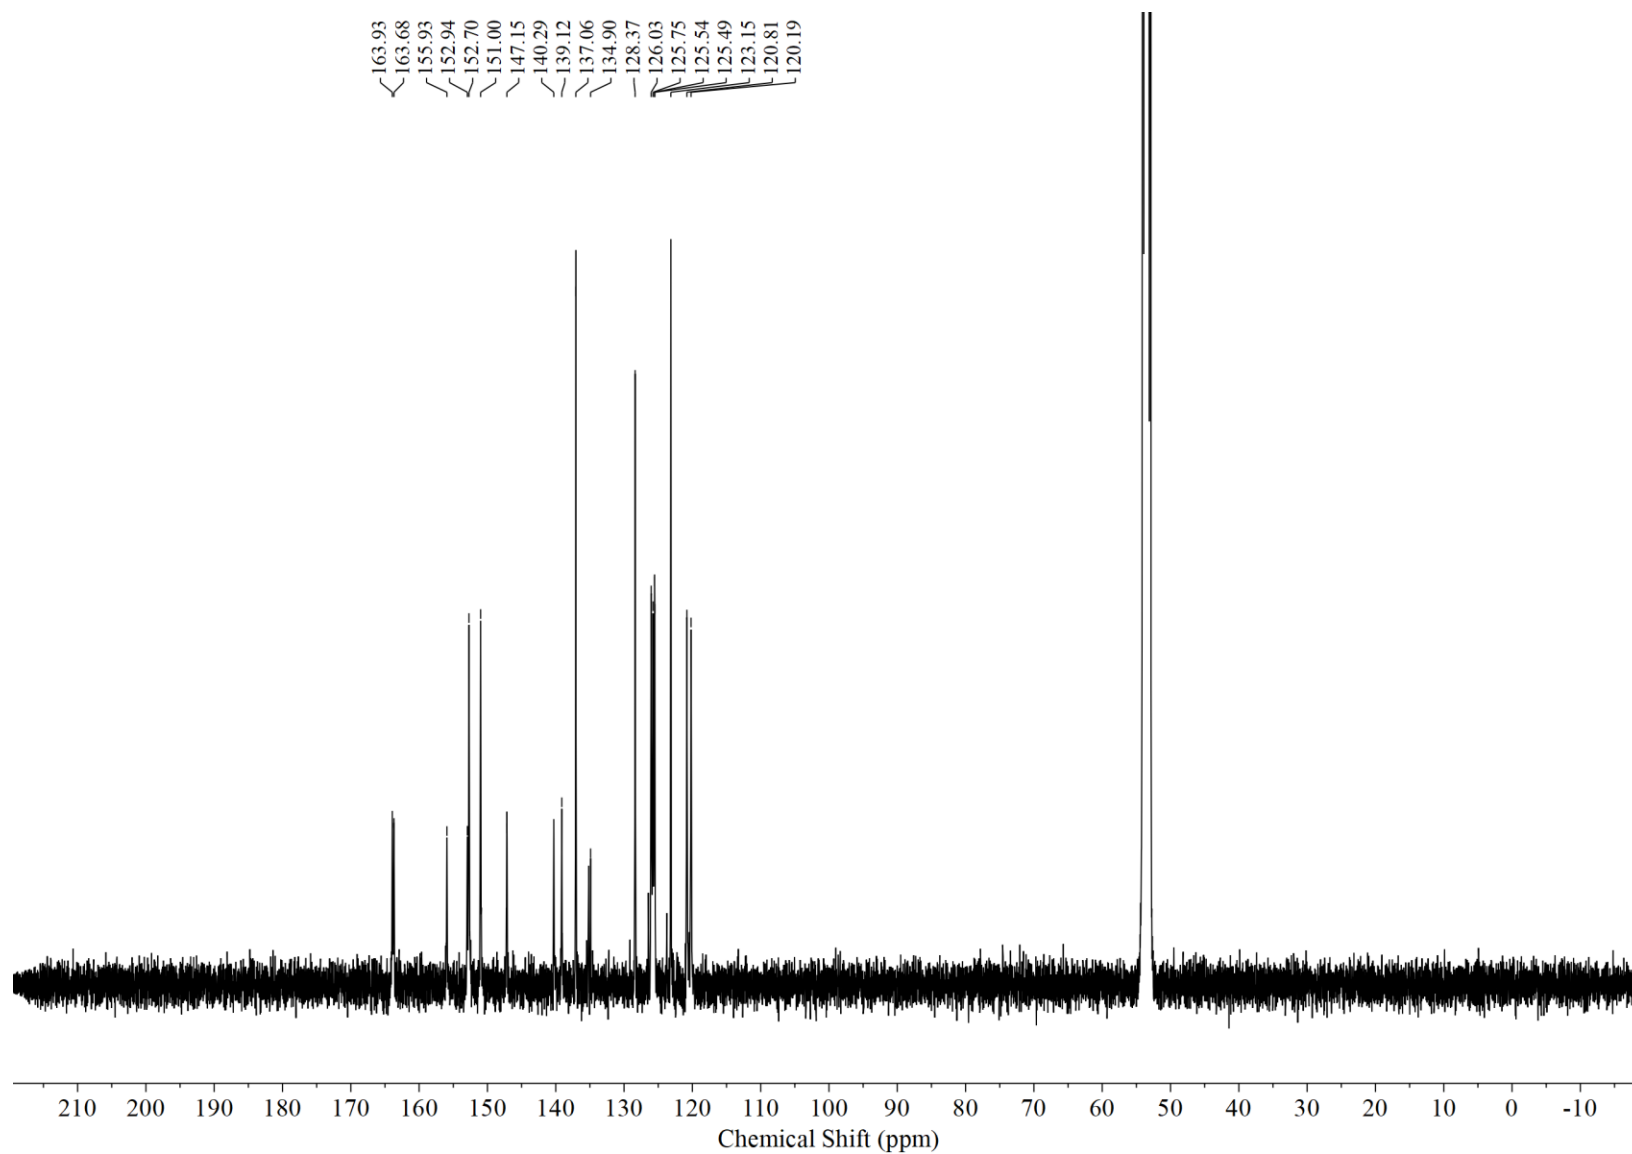

<sup>1</sup>H NMR (400 MHz, CD<sub>2</sub>Cl<sub>2</sub>): Ni(<sup>t</sup>Bu<sub>2</sub>bpy)(CH<sub>3</sub>Ph)Br, 1B-Br

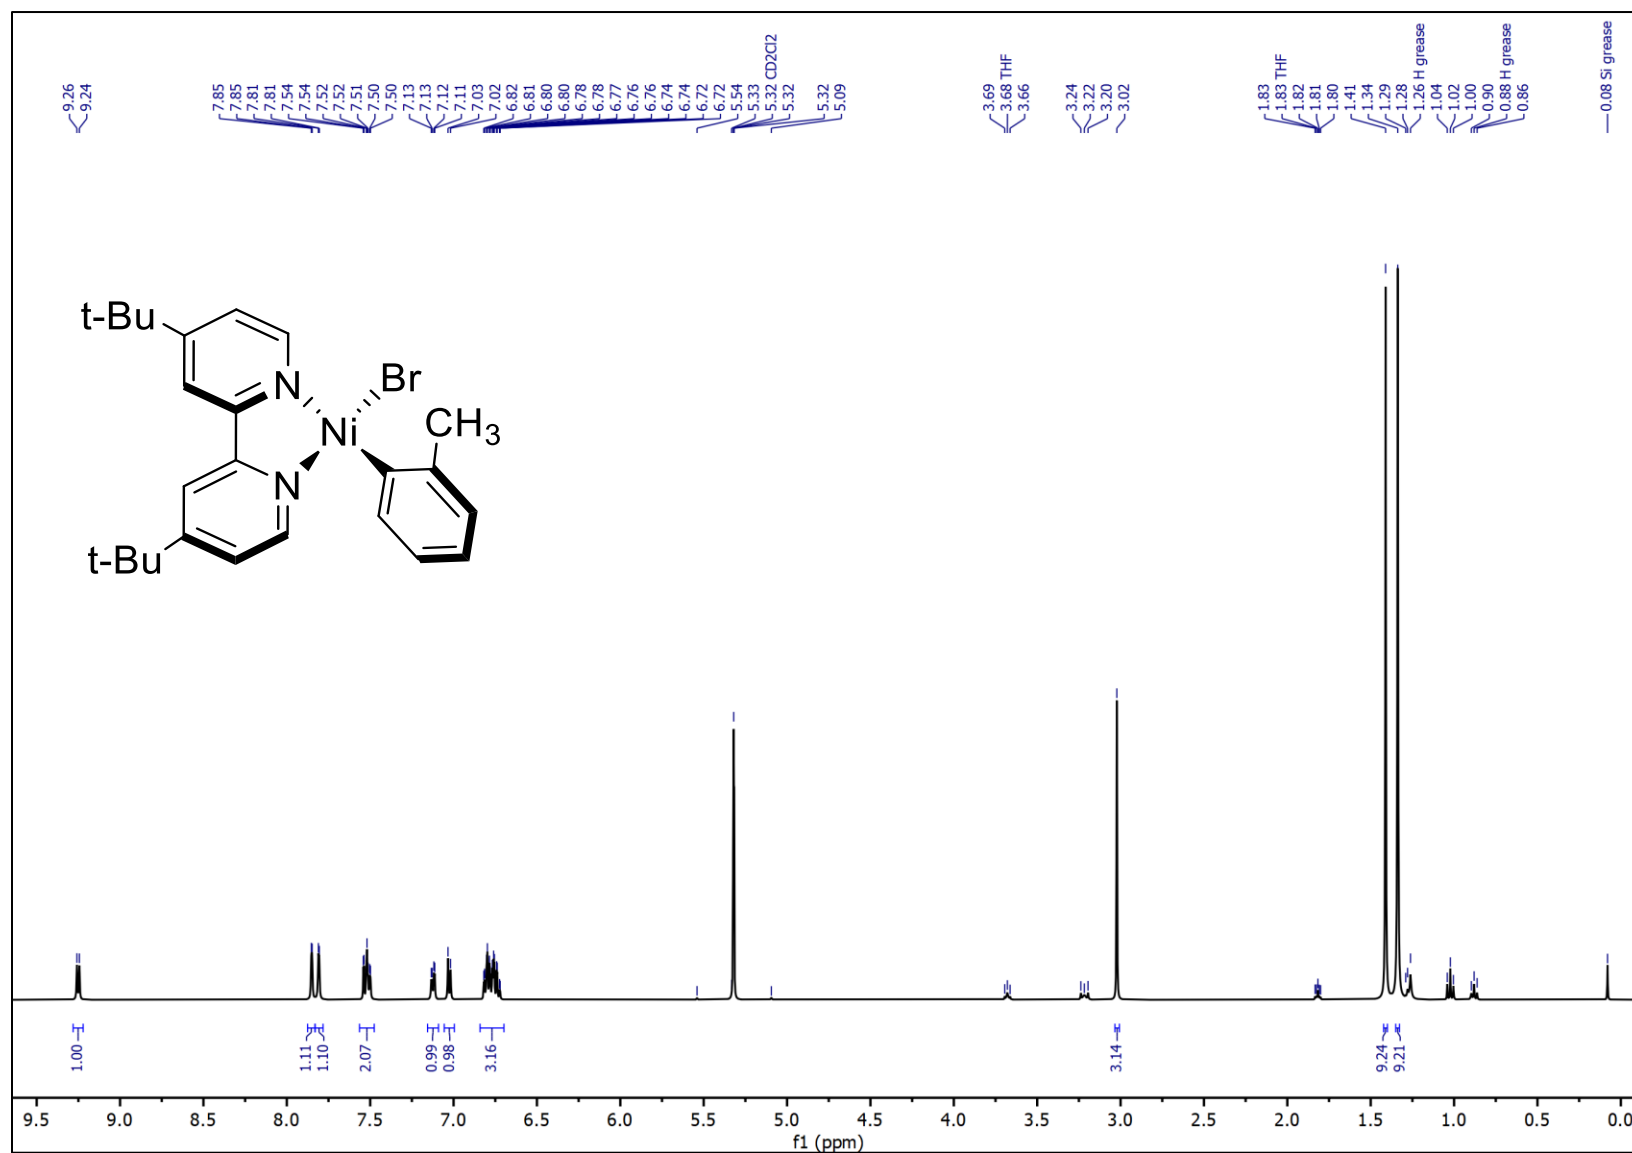

$^{13}\text{C}$  NMR (100 MHz,  $\text{CD}_2\text{Cl}_2$ ):  $\text{Ni}(\text{t-Bu}^i\text{bpy})(\text{CH}_3\text{Ph})\text{Br}$ , 1B-Br

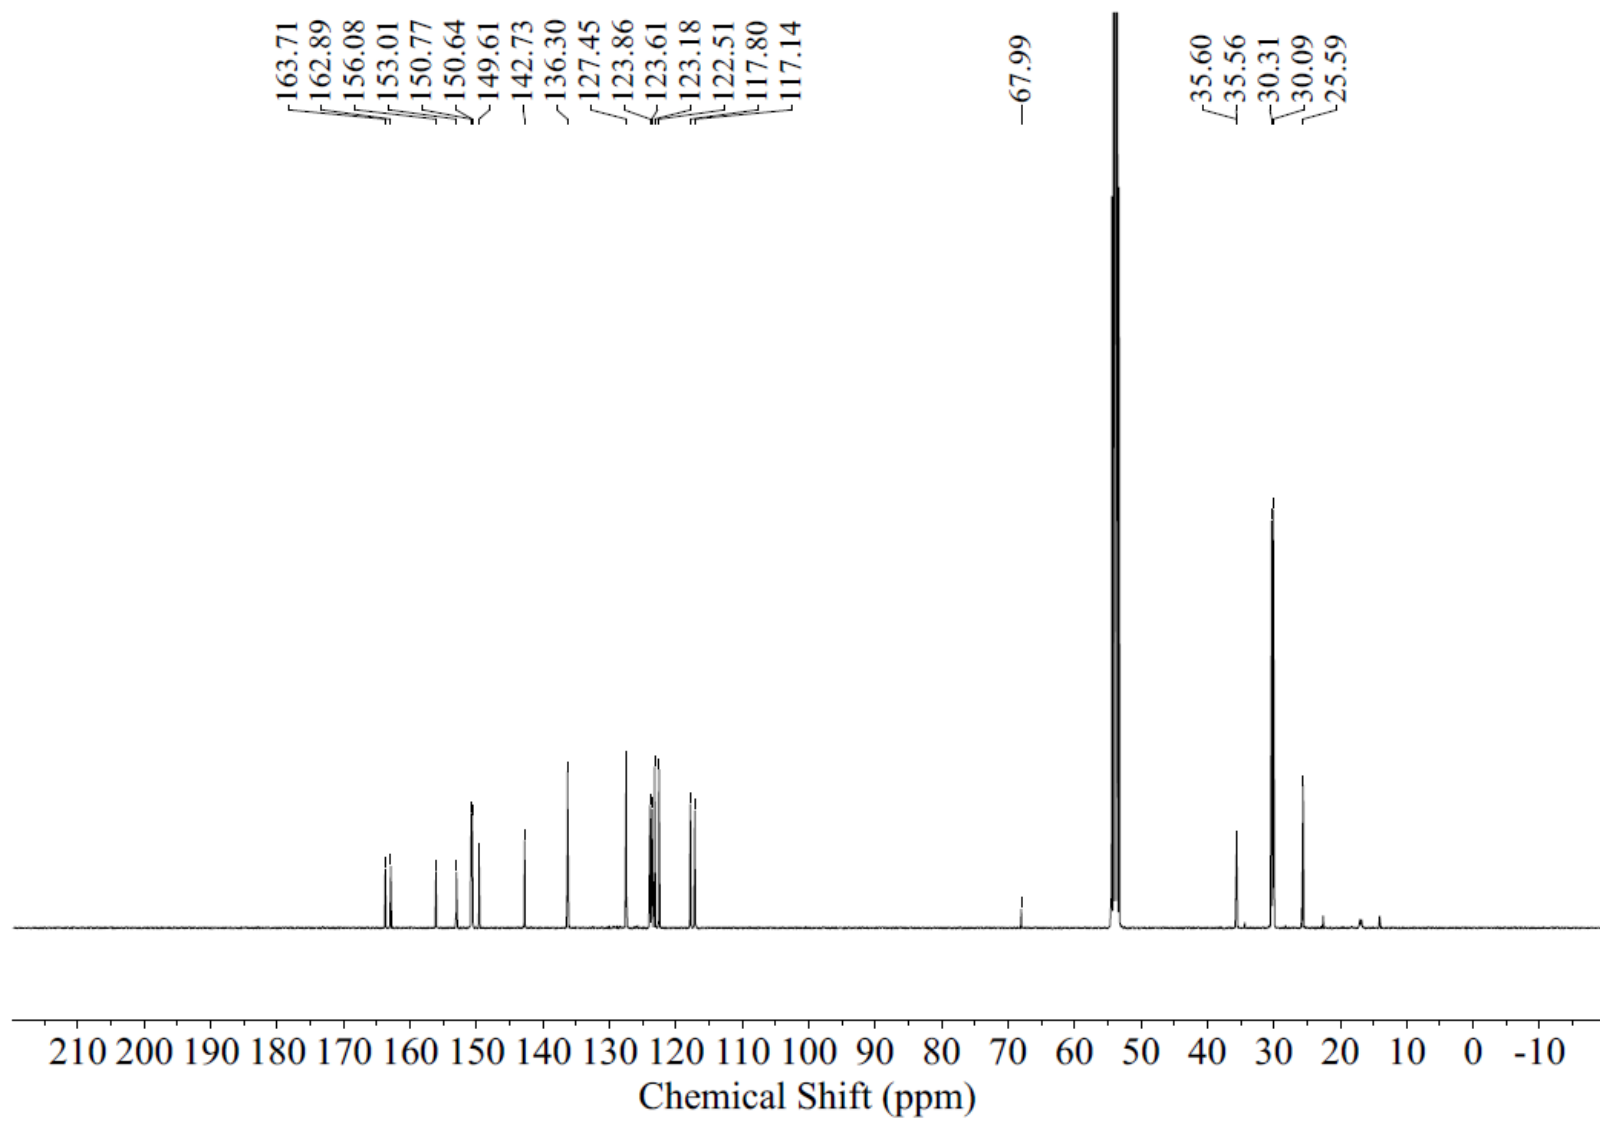

**$^{19}\text{F}$  NMR (400 MHz,  $\text{CD}_2\text{Cl}_2$ ):  $\text{Ni}(\text{TMEDA})(\text{CF}_3\text{Ph})\text{Cl}$**

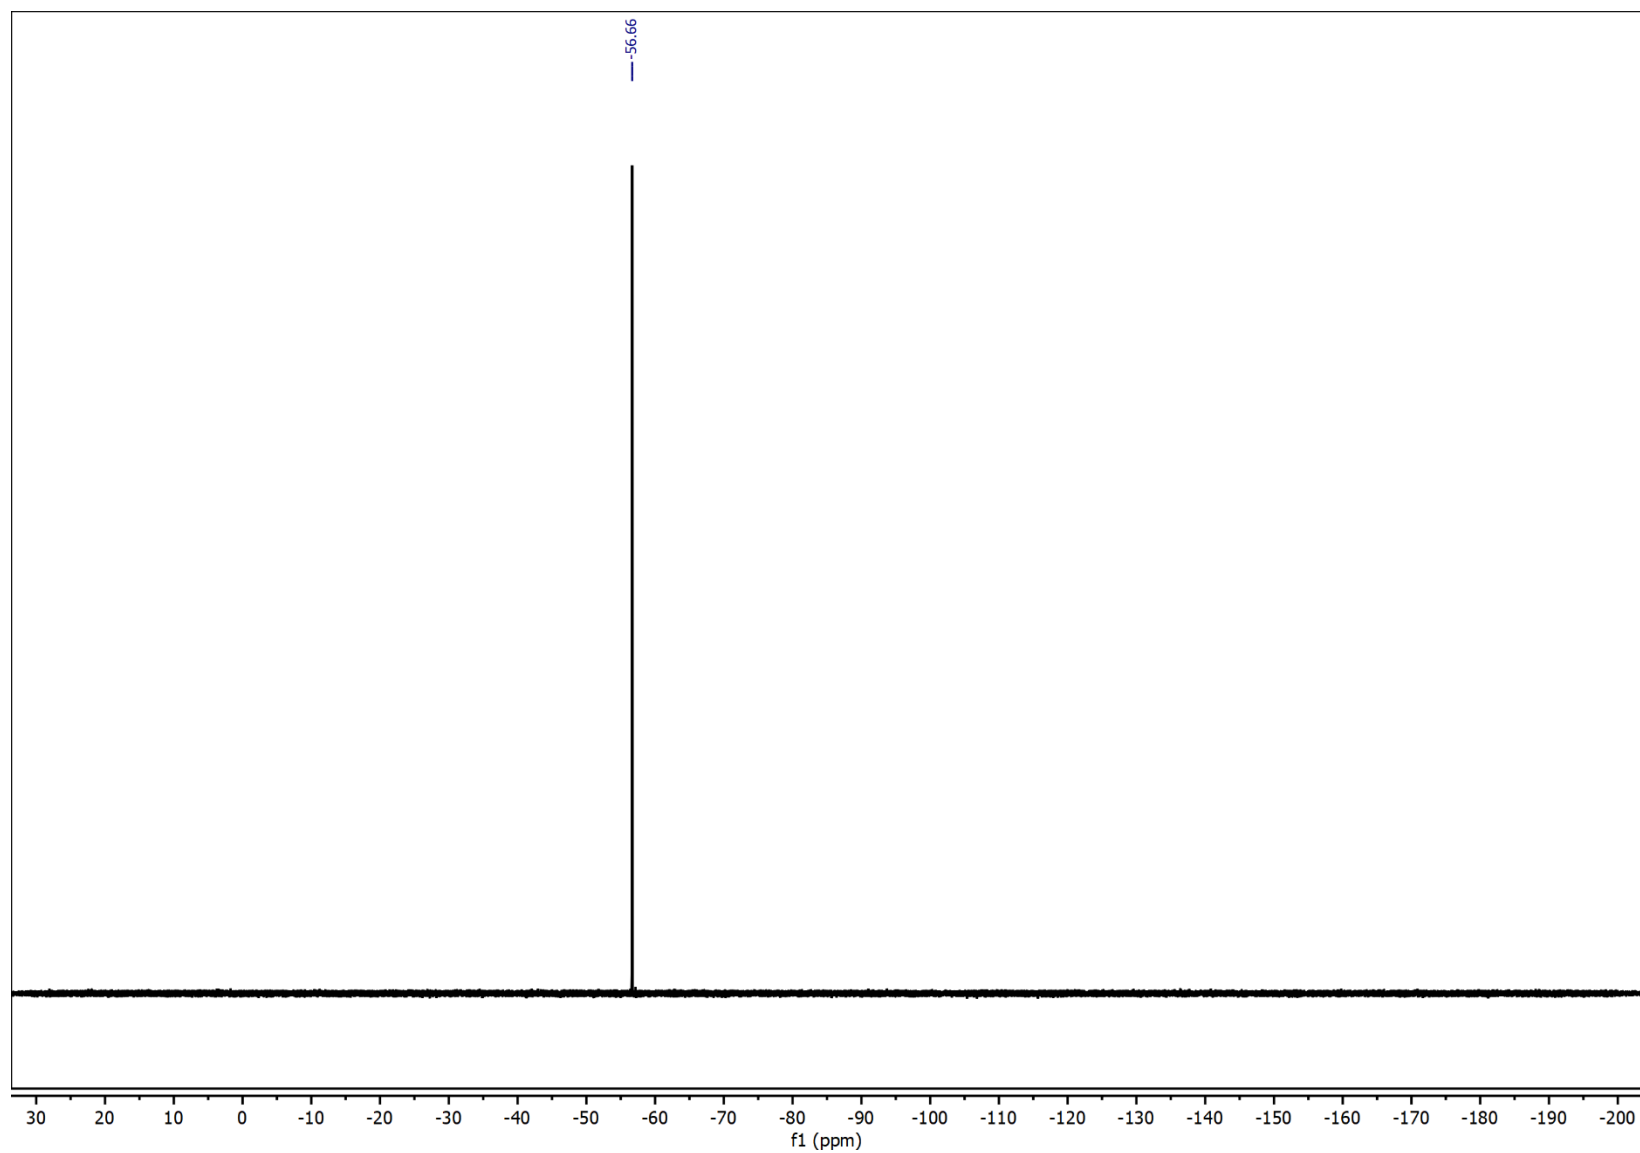

**$^{19}\text{F}$  NMR (400 MHz,  $\text{CD}_2\text{Cl}_2$ ):  $\text{Ni}(\text{MeO}bpy)(\text{CF}_3\text{Ph})\text{Cl}$ , 5A**

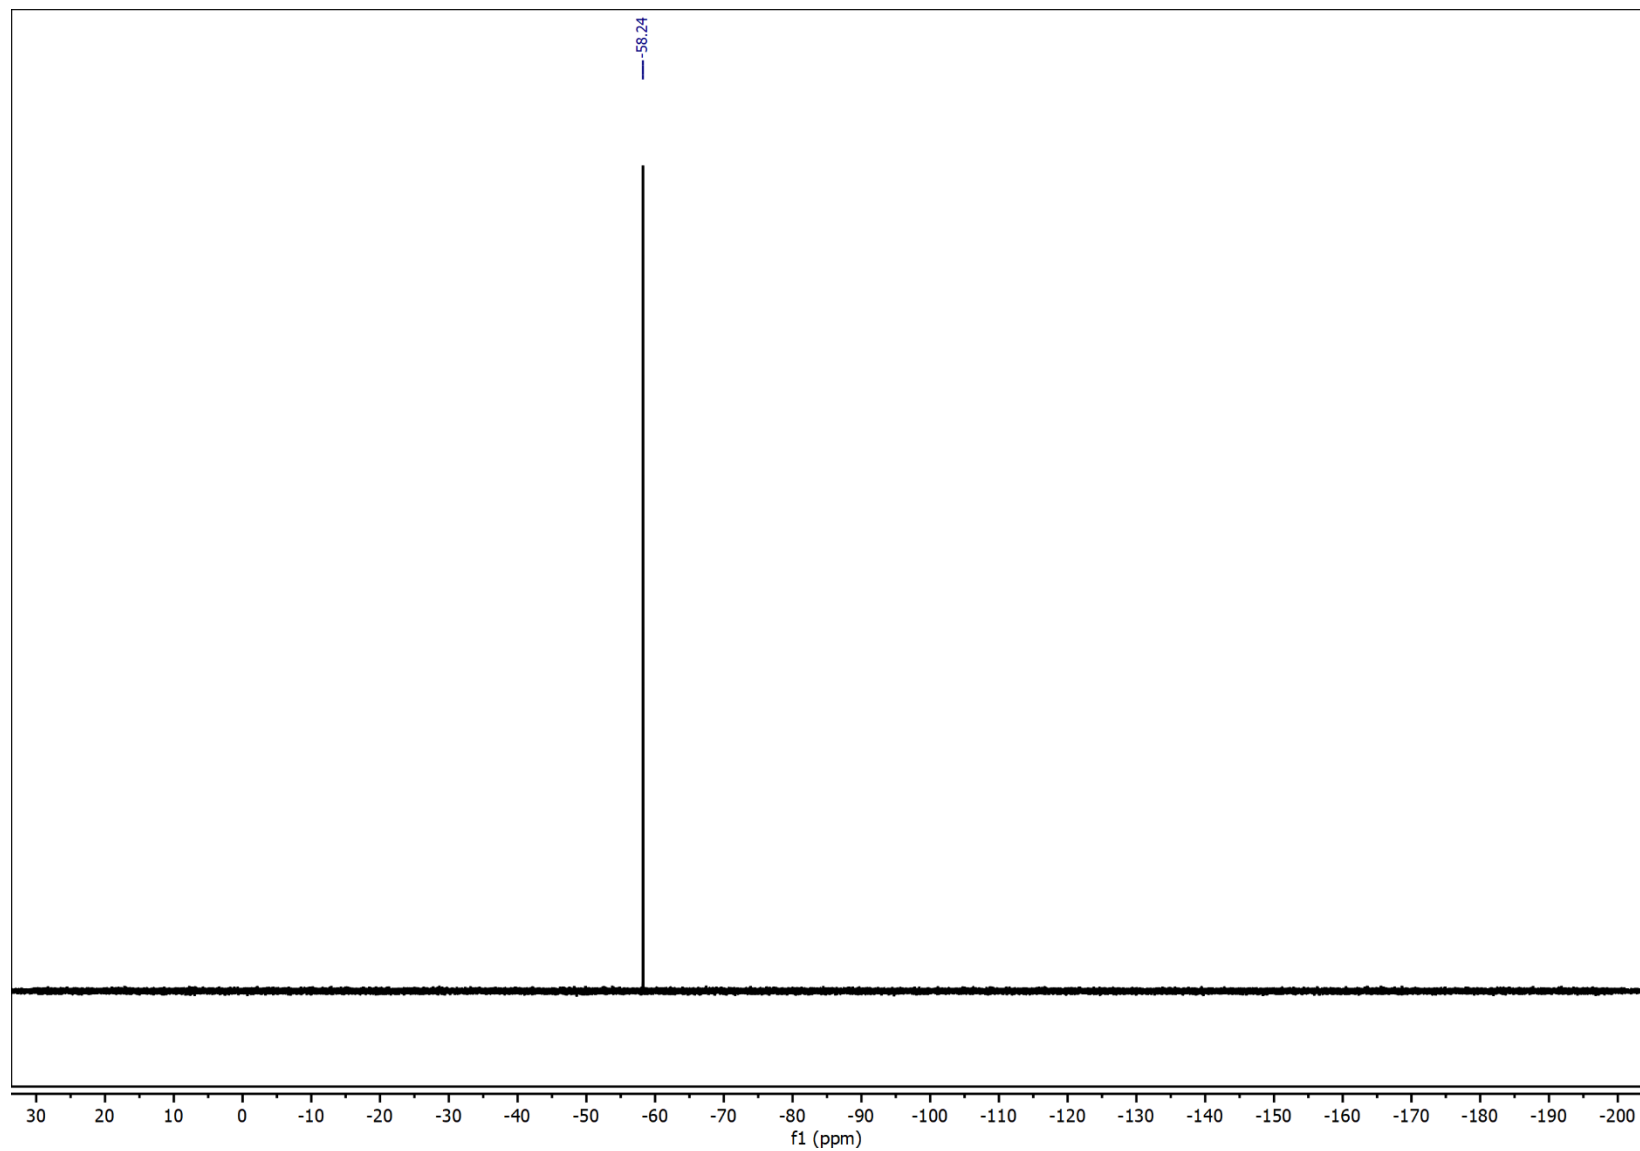



**$^{19}\text{F}$  NMR (400 MHz,  $\text{CD}_2\text{Cl}_2$ ):  $\text{Ni}(\text{}^t\text{Bu}^i\text{bpy})(\text{CF}_3\text{Ph})\text{Cl}$ , 5B**

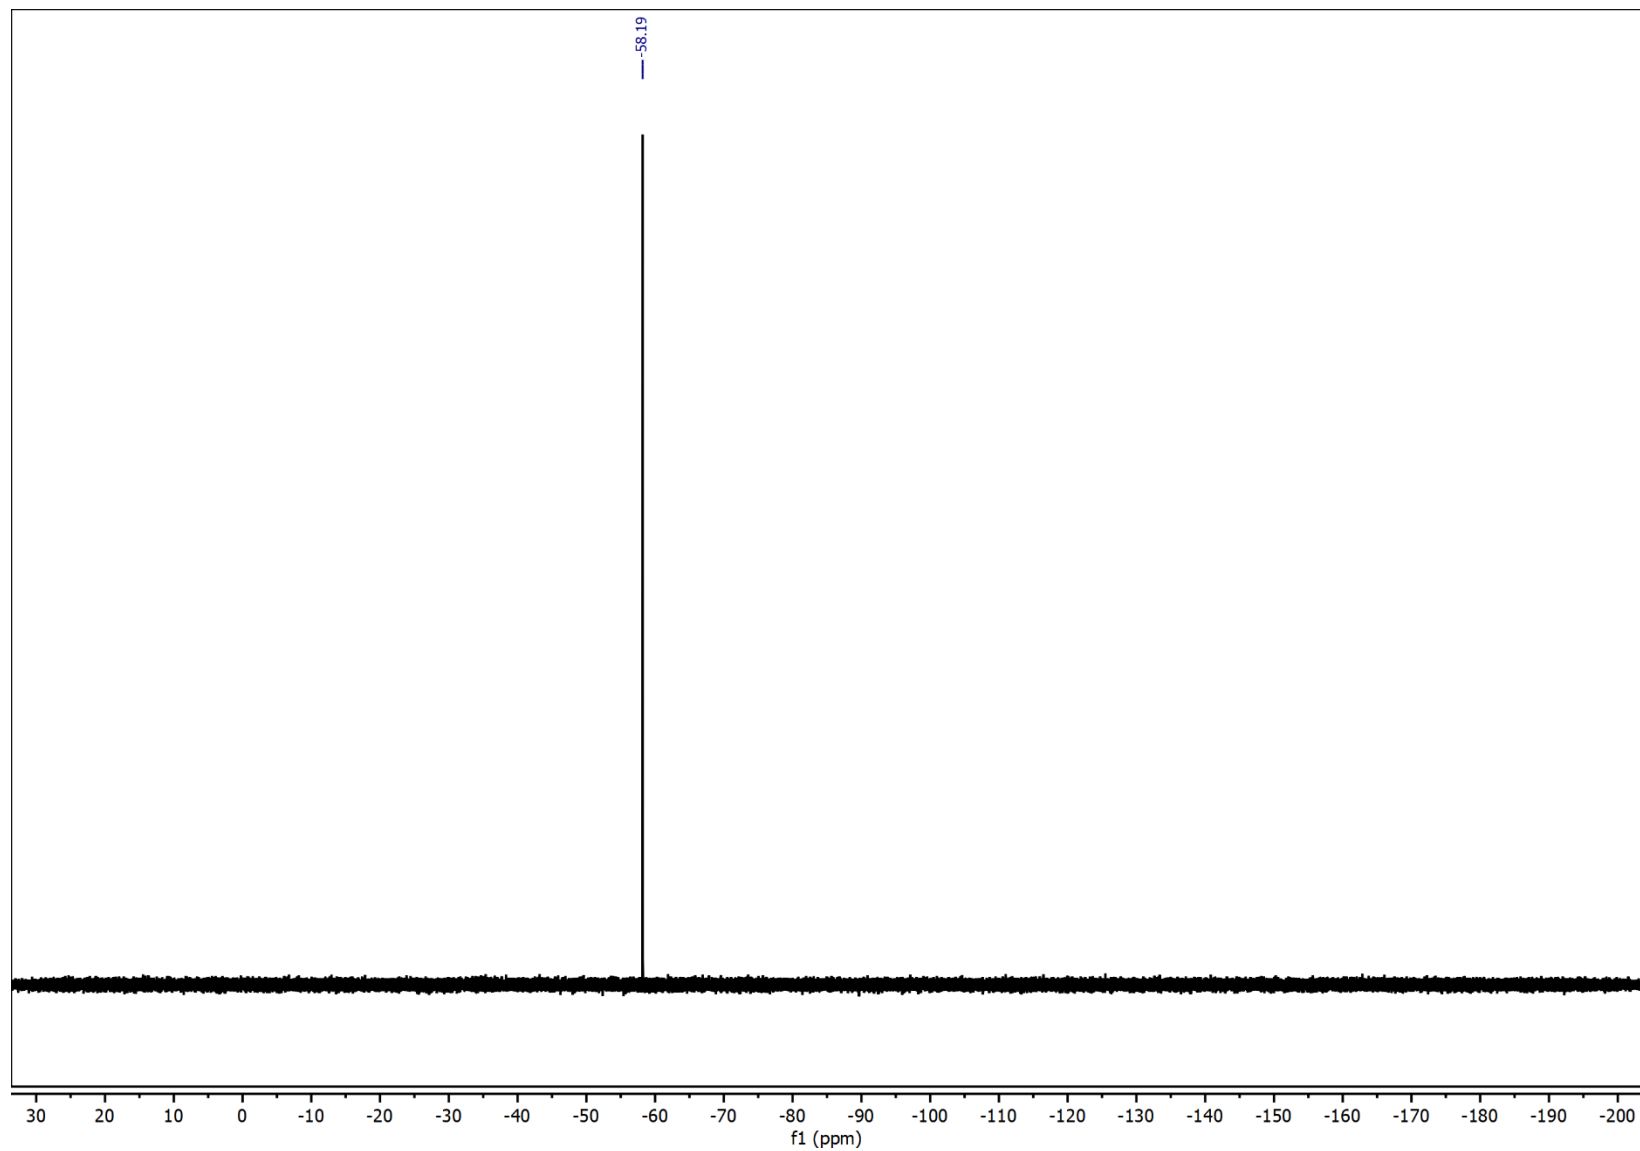

**$^{19}\text{F}$  NMR (400 MHz,  $\text{CD}_2\text{Cl}_2$ ):  $\text{Ni}(\text{Hbpy})(\text{CF}_3\text{Ph})\text{Cl}$ , 5C**

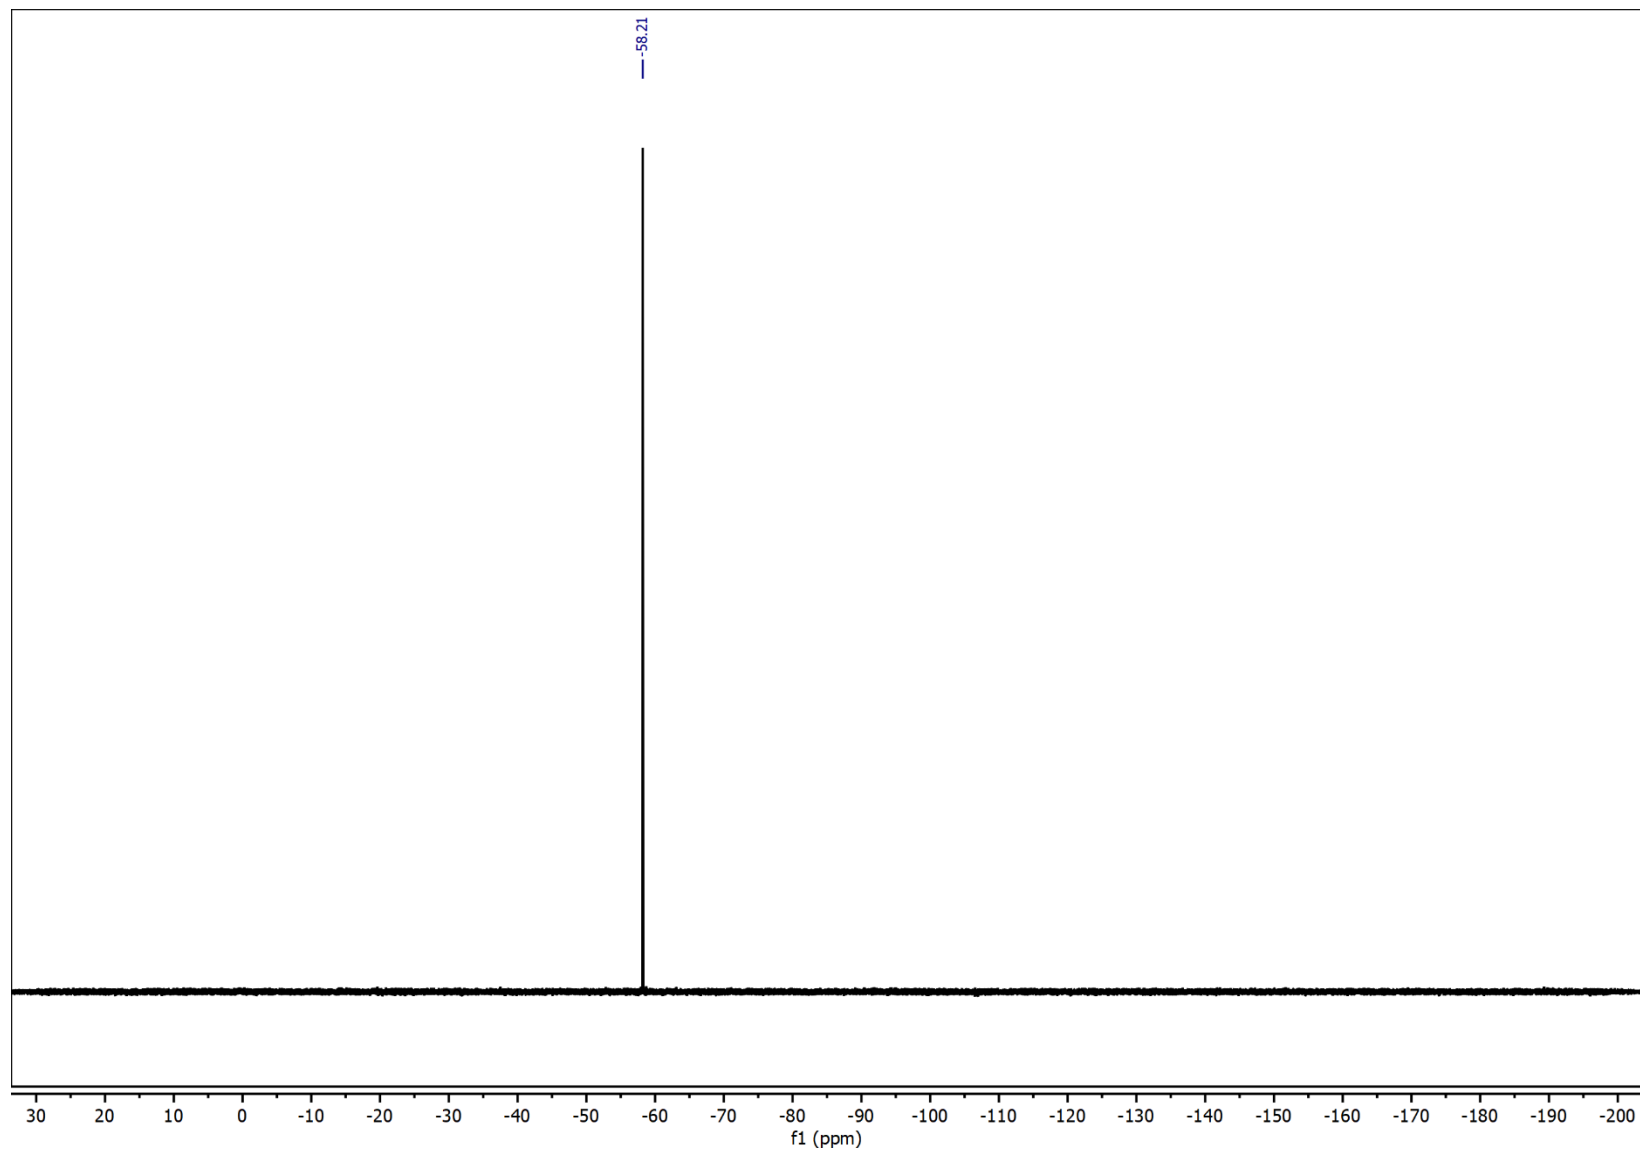

**$^{19}\text{F}$  NMR (400 MHz,  $\text{CD}_2\text{Cl}_2$ ):  $\text{Ni}(\text{MeOOCbpy})(\text{CF}_3\text{Ph})\text{Cl}$ , 5D**

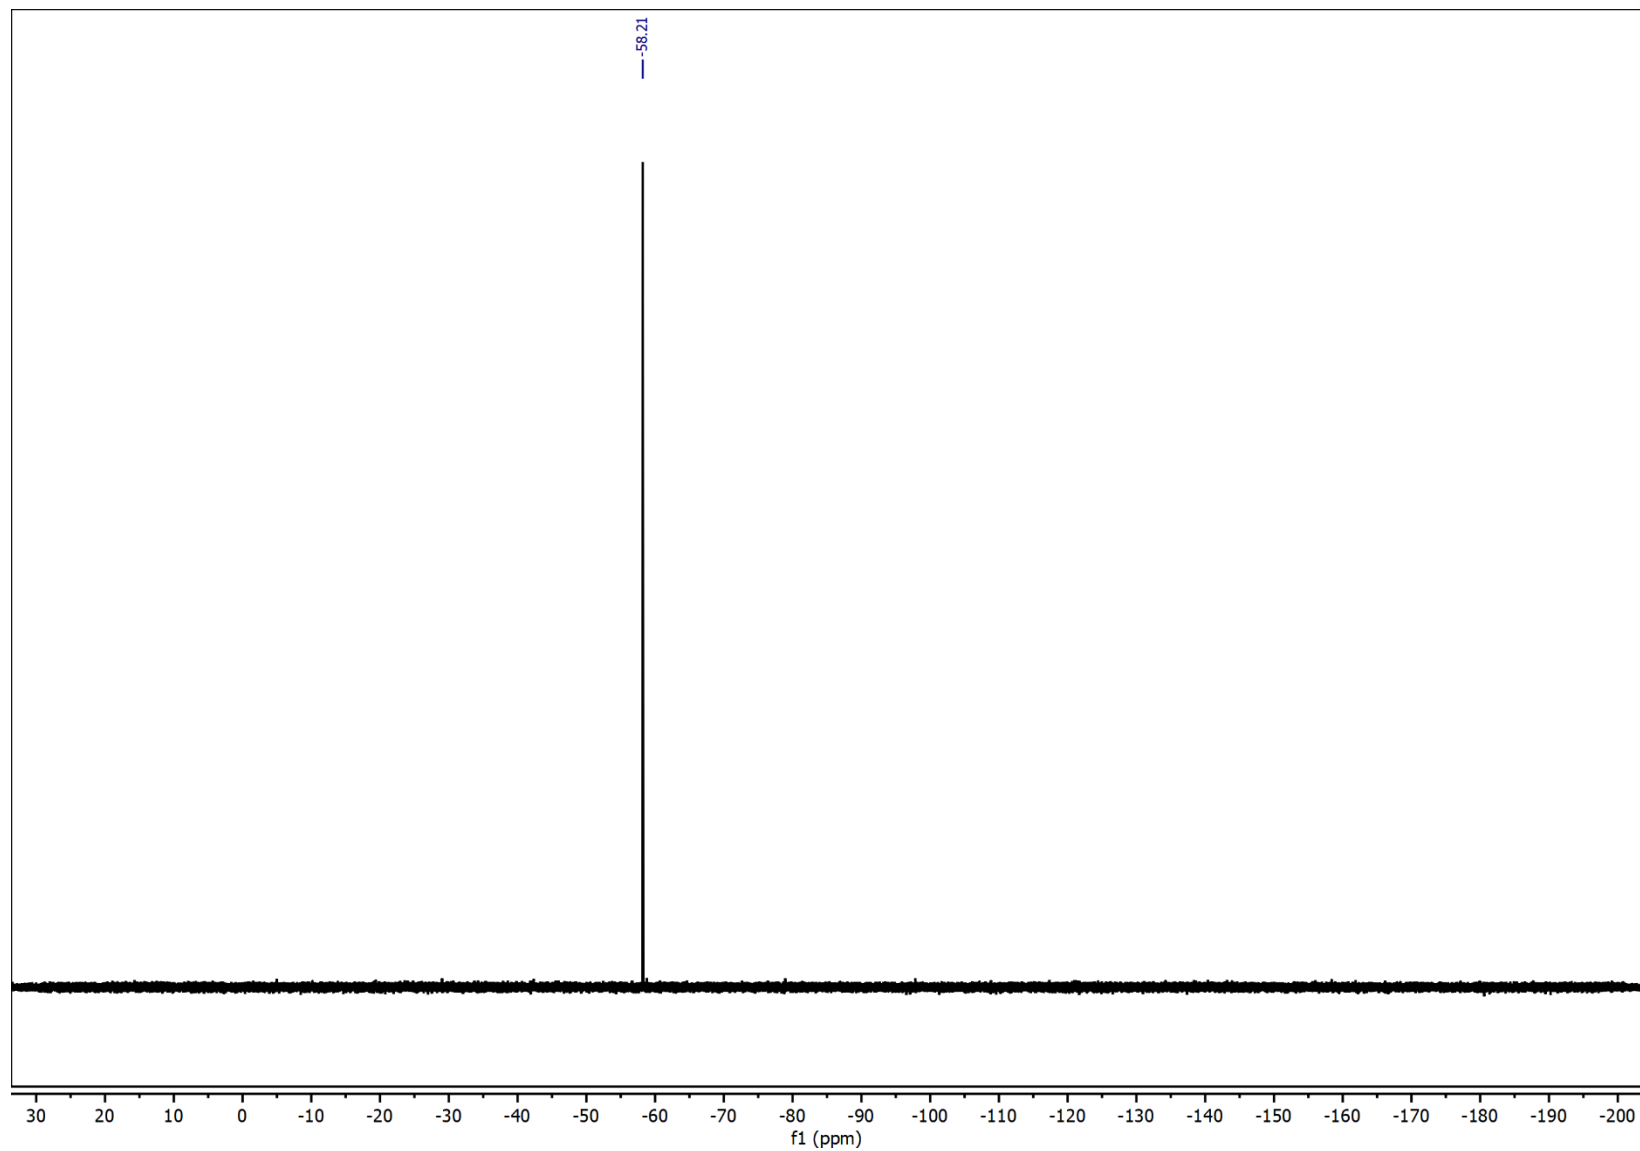

**$^{19}\text{F}$  NMR (400 MHz,  $\text{CD}_2\text{Cl}_2$ ): Ni(<sup>t</sup>Bu<sub>3</sub>py)(F-Ph)Cl, 4B**

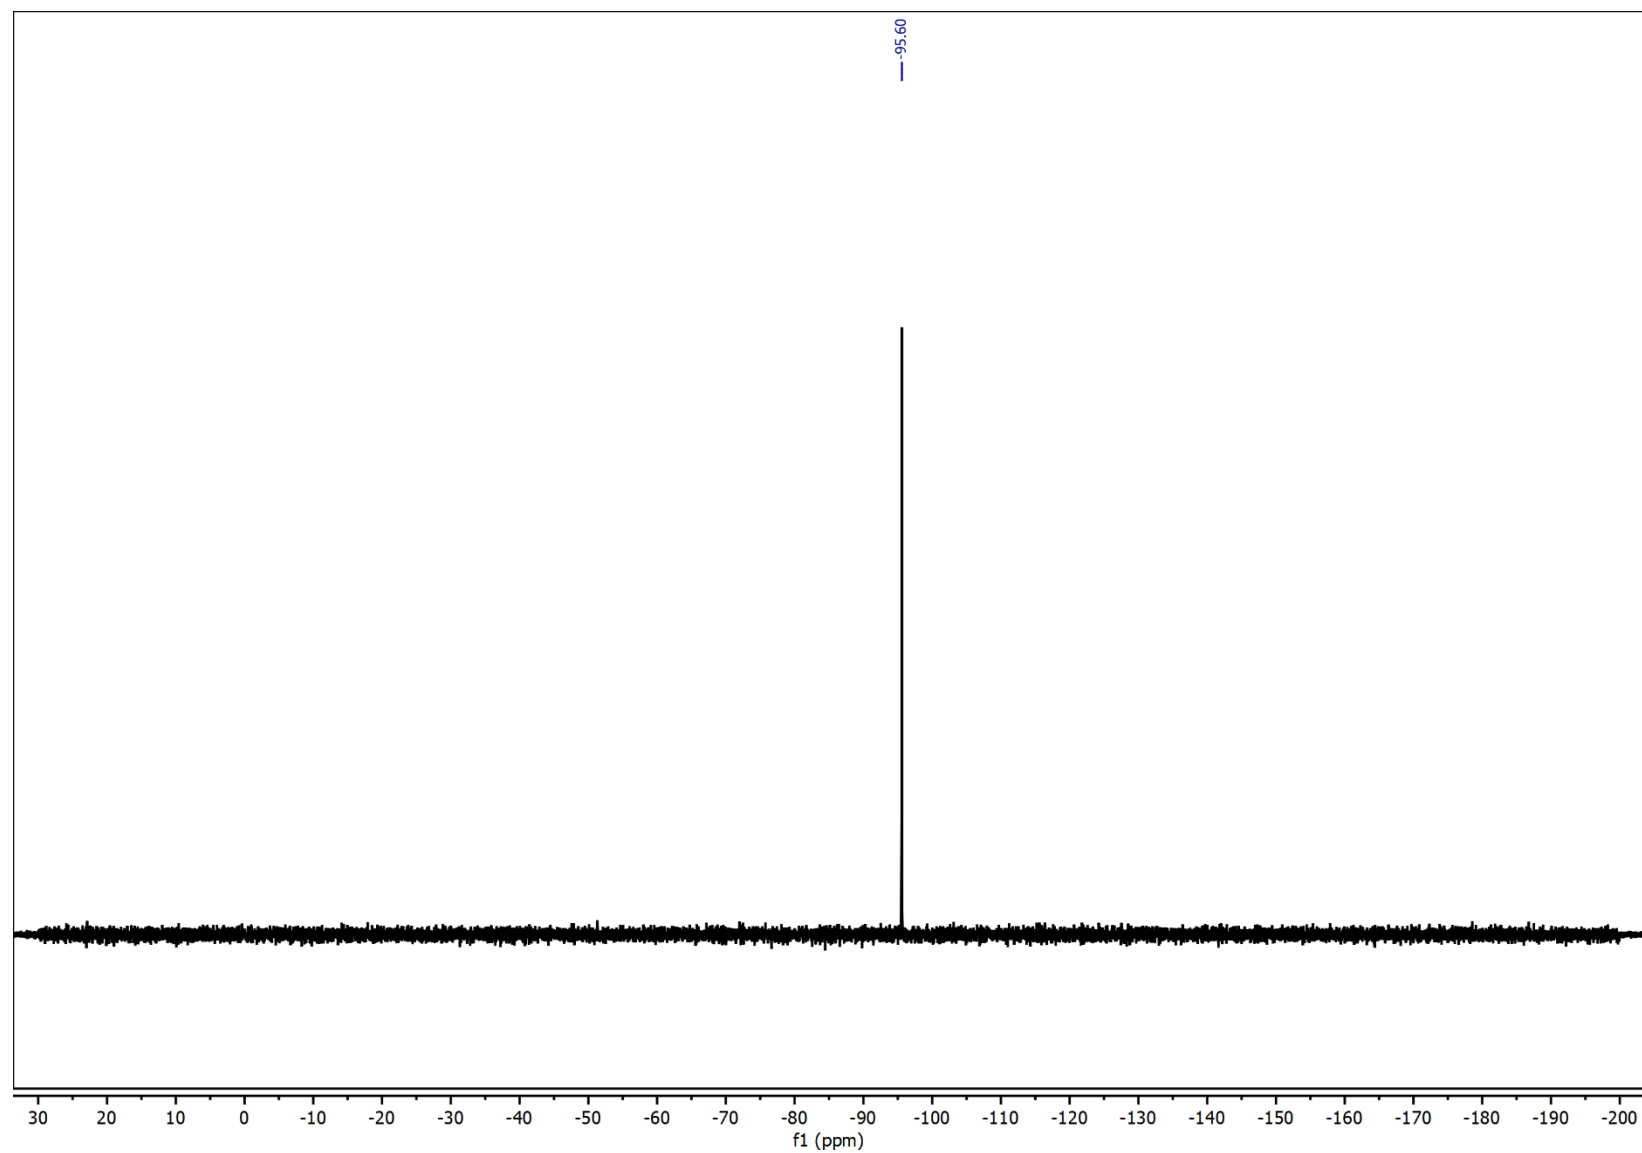

Supplement: NIHMS1870778-supplement-Supporting_Information.pdf [file NIHMS1870778-supplement-Supporting_Information.pdf]
